# Supplementary material for: From A3/KA2to AYA/KYA multicomponent coupling reactions with terminal ynamides as alkyne surrogates – a direct, green route to γ-amino-ynamides
Source: Royal Society of Chemistry journal article supplement (doi:10.1039/d2gc00966h), 2022-01-01
Supplement: d2gc00966h1.pdf [file d2gc00966h1.pdf]

# From A<sup>3</sup>/KA<sup>2</sup> to AYA/KYA Multicomponent Coupling Reactions with Terminal Ynamides as Alkyne Surrogates – A Direct, Green Route to $\gamma$ -Amino- Ynamides

Fabian Schlimpen, Tun Ast, Valérie Bénéteau, Patrick Pale,\* and Stefan Chassaing\*

## SUPPORTING INFORMATION

|                                                                     |             |
|---------------------------------------------------------------------|-------------|
| I. Optimisation of Reaction Conditions (Design of Experiment) ..... | <b>S2</b>   |
| II. General Experimental Methods.....                               | <b>S5</b>   |
| III. General Procedures & Reusability Study .....                   | <b>S5</b>   |
| IV. Analytical Description of Products.....                         | <b>S7</b>   |
| V. References.....                                                  | <b>S25</b>  |
| VI. NMR Spectra of Previously Unreported Products.....              | <b>S26</b>  |
| VII. X-Ray Crystallographic Data for Compound 5d .....              | <b>S106</b> |

## I. Optimisation of Reaction Conditions (Design of Experiment)

The solvent-free reaction between benzaldehyde (**1**), ynesulfonamide **2** and pyrrolidine (**3**) was used as a bench reaction to perform the optimisation studies *via* design of experiment (DoE).

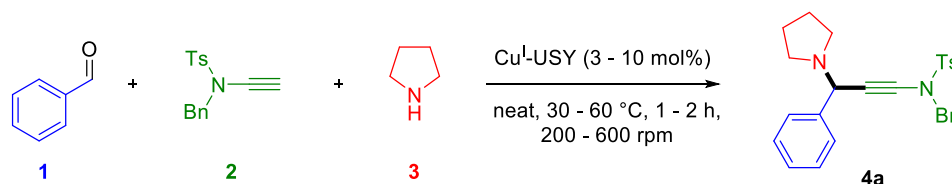

**Scheme S1.** The bench reaction used to optimise the reaction conditions.

Six factors, namely temperature (**A**), catalyst loading (**B**), aldehyde equivalents (**C**), stirring rate (**D**), stirring bar type (**E**) and reaction time (**F**), were studied in a 2<sup>6-3</sup> fractional factorial design giving a total number of eight experiments, which were run in parallel. **Table S1** shows the low and high levels for each factor.

**Table S1.** The investigated factors and their relative ranges.

| Factor   | Name             | Units | Type      | Min   | Max | Mean    | Std. Dev. |
|----------|------------------|-------|-----------|-------|-----|---------|-----------|
| <b>A</b> | Temperature      | °C    | Numeric   | 30    | 60  | 45      | 16.04     |
| <b>B</b> | Catalyst loading | mol%  | Numeric   | 3     | 10  | 6.5     | 3.74      |
| <b>C</b> | Aldehyde qty     | eq    | Numeric   | 1.0   | 1.5 | 1.25    | 0.2673    |
| <b>D</b> | Stirring rate    | rpm   | Numeric   | 200   | 600 | 400     | 213.81    |
| <b>E</b> | Stirring bar     |       | Categoric | Small | Big | Levels: | 2         |
| <b>F</b> | Reaction time    | min   | Numeric   | 60    | 120 | 90      | 32.07     |

**Table S2** shows the matrix of the design giving the standard run numbers, as well as the actual run number order together with the estimated yields (%) of formed  $\gamma$ -amino-ynamide **4a** (the recorded response) as determined *via* <sup>1</sup>H NMR using 1,3,5-trimethoxybenzene as internal standard.

**Table S2.** Design matrix.

|     |     | <b>A</b>         | <b>B</b>                | <b>C</b>          | <b>D</b>            | <b>E</b>     | <b>F</b>            | <b>Resp.</b>        |
|-----|-----|------------------|-------------------------|-------------------|---------------------|--------------|---------------------|---------------------|
| Std | Run | Temperature (°C) | Catalyst loading (mol%) | Aldehyde qty (eq) | Stirring rate (rpm) | Stirring bar | Reaction time (min) | Yield <b>4a</b> (%) |
| 1   | 1   | 30               | 3                       | 1.0               | 600                 | Big          | 120                 | 86                  |
| 6   | 2   | 60               | 3                       | 1.5               | 200                 | Big          | 60                  | 59                  |
| 4   | 3   | 60               | 10                      | 1.0               | 600                 | Small        | 60                  | 63                  |
| 5   | 4   | 30               | 3                       | 1.5               | 600                 | Small        | 60                  | 86                  |
| 2   | 5   | 60               | 3                       | 1.0               | 200                 | Small        | 120                 | 78                  |
| 7   | 6   | 30               | 10                      | 1.5               | 200                 | Small        | 120                 | 84                  |
| 3   | 7   | 30               | 10                      | 1.0               | 200                 | Big          | 60                  | 79                  |
| 8   | 8   | 60               | 10                      | 1.5               | 600                 | Big          | 120                 | 83                  |

The half-normal probability plot and PARETO chart were used for preliminary model selection. In this case, two models could be identified differing solely in the inclusion or exclusion of factor **D**, the stirring rate (**Figure S1**). Indeed, when included, factor **D** exceeds the t-value limit in the PARETO chart, however, significantly lays below the BONFERRONI limit (**Figure S1**, left). Consequently, stirring rate (**D**) was not included in the model. What can be deduced from both models is that temperature (**A**) was found to show the greatest impact on the ynamide yield, followed by the reaction time (**F**). In addition, the interaction term of both factors, **AF**, was found to significantly affect the ynamide yield. Considering this data set, the factors catalyst loading (**B**), aldehyde equivalents (**C**), and stirring bar type (**E**) do not significantly affect the ynamide yield within the investigated ranges. **Table S3** represents the ANOVA of the polynomial model including the factors temperature (**A**) and reaction time (**F**), as well as their interaction term **AF**. **Table S4** shows the corresponding Fit Statistics.

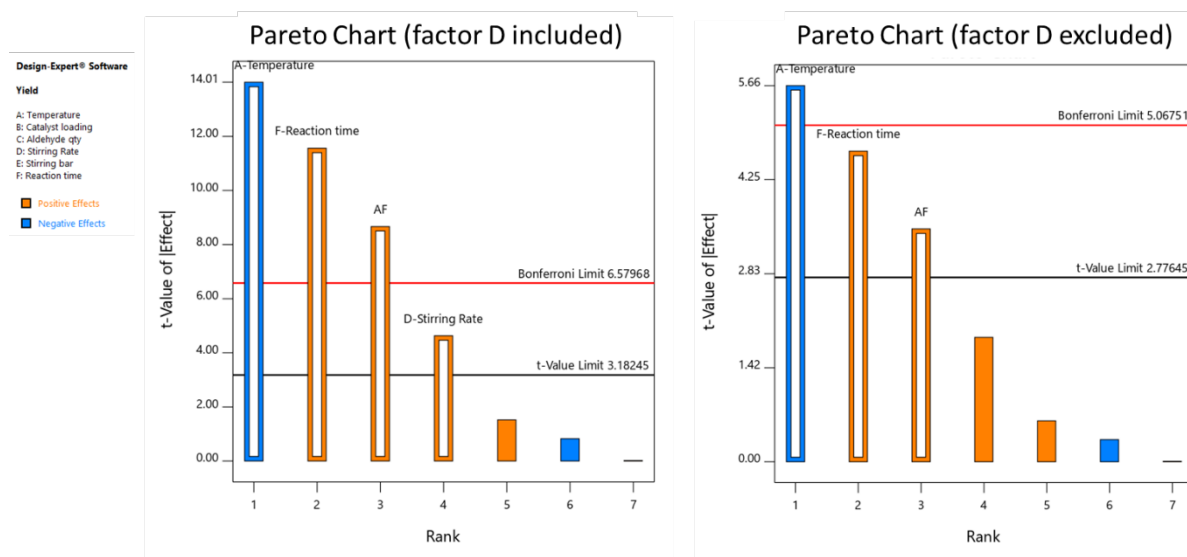

Figure S1. PARETO charts. Left: including factor D (stirring rate); right: excluding factor D.

Table S3. ANOVA for selected factorial model.

| Source                 | Sum of Squares | df | Mean Square | F-value | p-value |             |
|------------------------|----------------|----|-------------|---------|---------|-------------|
| <b>Model</b>           | 739.48         | 3  | 246.49      | 22.08   | 0.0060  | significant |
| <b>A-Temperature</b>   | 358.12         | 1  | 358.12      | 32.08   | 0.0048  |             |
| <b>F-Reaction time</b> | 244.13         | 1  | 244.13      | 21.87   | 0.0095  |             |
| <b>AF</b>              | 137.24         | 1  | 137.24      | 12.29   | 0.0248  |             |
| <b>Residual</b>        | 44.65          | 4  | 11.16       |         |         |             |
| <b>Cor Total</b>       | 784.13         | 7  |             |         |         |             |

**Table S4. Fit Statistics.**

|                  |       |  |                                |         |
|------------------|-------|--|--------------------------------|---------|
| <b>Std. Dev.</b> | 3.34  |  | <b>R<sup>2</sup></b>           | 0.9431  |
| <b>Mean</b>      | 77.17 |  | <b>Adjusted R<sup>2</sup></b>  | 0.9004  |
| <b>C.V. %</b>    | 4.33  |  | <b>Predicted R<sup>2</sup></b> | 0.7722  |
|                  |       |  | <b>Adeq Precision</b>          | 10.3408 |

The coded equation for the selected model is:

$$\text{Yield} = 77.1699 + (-6.69063 * \mathbf{A}) + 5.52417 * \mathbf{F} + 4.1418 * \mathbf{AF}.$$

The actual equation for the selected model is:

$$\text{Yield} = 117.945 + (-1.2744 * \text{Temperature}) + (-0.230041 * \text{Reaction time}) + 0.009204 * \text{Temperature} * \text{Reaction time}$$

yielding the graphical representation shown in **Figure S2**.

Design-Expert® Software  
Factor Coding: Actual

Yield (%)  
59 86

X1 = A: Temperature  
X2 = F: Reaction time

**Actual Factors**  
B: Catalyst loading = 3  
C: Aldehyde qty = 1  
D: Stirring Rate = 600  
E: Stirring bar = Small

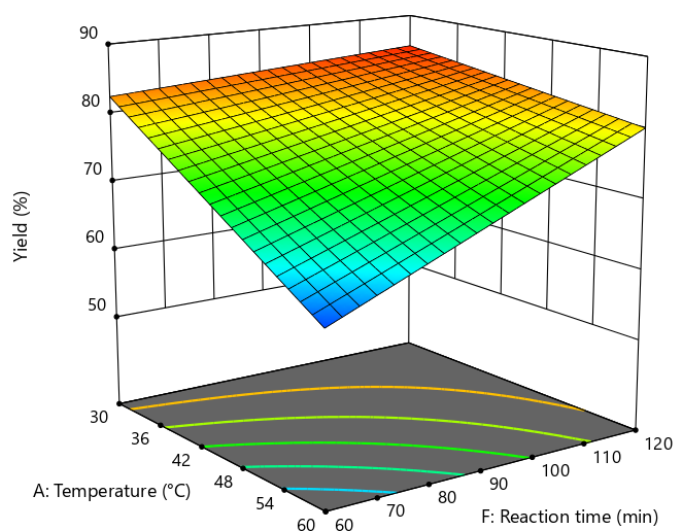

**Figure S2. Response surface.**

To conclude, temperature and reaction time were identified as the crucial factors to afford ynamide in high yield. This is in concordance with the preliminary results discussed above. As the optimal settings for those factors probably greatly depend on the substrate combination no further optimisation studies *via* DoE were performed. Nevertheless, the following conditions were set as the standard conditions for the scope based on the DoE results:

| <b>A: Temperature</b> | <b>B: Catalyst loading</b> | <b>C: Aldehyde qty</b> | <b>D: Stirring Rate</b> | <b>E: Stirring bar</b> |
|-----------------------|----------------------------|------------------------|-------------------------|------------------------|
| 30 °C                 | 3 mol%                     | 1.0 eq                 | 600 rpm                 | Small                  |



## II. General Experimental Methods

All starting materials were purchased at the highest commercial quality and used as received unless otherwise stated. – Reactions were monitored by thin-layer chromatography carried out on silica plates (silica gel 60 F254, Merck) using UV-light and/or  $\text{KMnO}_4$  and/or vanillin dip for visualisation. Column chromatographies were performed on (deactivated) silica gel 60 (0.040-0.063 mm, Merck) using cyclohexane/EtOAc mixtures as eluents. – Evaporation of solvents was conducted under reduced pressure at temperatures equal to or less than 40 °C. – IR spectra were recorded neat on a Bruker Alpha ATR Diamant. Wave numbers are given in  $\text{cm}^{-1}$ . –  $^1\text{H}$  and  $^{13}\text{C}$  NMR spectra were recorded on Bruker Avance spectrometers at 300, 400 or 500 MHz for  $^1\text{H}$  NMR experiments and 126 MHz for  $^{13}\text{C}$  NMR experiments. Chemical shifts ( $\delta$ ) and coupling constants ( $J$ ) are given in ppm and Hertz (Hz), respectively. The signal multiplicity is described according to the following abbreviations: s (singlet), br s (broad singlet), d (doublet), t (triplet), q (quartet), quint (quintet), sextet (sext), septet (sept), and m (multiplet). Chemical shifts ( $\delta$ ) are reported relative to the residual solvent as an internal standard ( $\text{CDCl}_3$ :  $\delta = 7.26$  ppm for  $^1\text{H}$  and  $\delta = 77.16$  ppm for  $^{13}\text{C}$ ). Carbon multiplicities were determined by DEPT135 experiments. – Electrospray Ionization (ESI) and Electrospray Ionization Time-Of-Flight (ESI-TOF) low/high-resolution mass spectra were obtained from the “Service de Spectroscopie de Masse” of the Fédération de Chimie “Le Bel” (FR2010).

## III. General Procedures & Reusability Study

### General Procedure for the Preparation of $\text{Cu}^{\text{I}}$ -USY

$\text{Cu}^{\text{I}}$ -USY was prepared according to a well-established solid/solid exchange procedure. Commercial  $\text{NH}_4$ -USY (ZEOLYST® CBV500) was first loaded in an oven and heated at 550 °C for 4 h to give H-USY. A mixture of so-formed H-USY (1.0 g, 3.8 mmol acidic sites/g of zeolite) and  $\text{CuCl}$  (376 mg, 1.0 eq. related to the number of H-zeolite protons) were ground by mortar and pestle and then heated in a furnace under flowing nitrogen at 350 °C for three days furnishing the expected  $\text{Cu}^{\text{I}}$ -USY.

### General Procedure A: Synthesis of Sulfonamides

To an ice-cold solution of primary amine (1.0 eq.) and  $\text{Et}_3\text{N}$  (2.0 eq.) in dry  $\text{CH}_2\text{Cl}_2$  (0.2 M) was added the corresponding sulfonyl chloride (1.1 eq.) in small portions and the mixture was stirred at room temperature until completion as indicated by thin layer chromatography. The reaction was then quenched with water (30 mL/10 mmol amine) and the aqueous phase was extracted with  $\text{CH}_2\text{Cl}_2$  ( $3 \times 20$  mL). The combined organic phases were dried over  $\text{Na}_2\text{SO}_4$ , filtered and the solvent was removed under reduced pressure. If necessary, the crude product was purified *via* column chromatography using silica gel.

### General Procedure B: Synthesis of 1,2-Dichloroenamides

Amide (1.0 eq.) and powdered  $\text{Cs}_2\text{CO}_3$  (1.5 eq.) were given into a flame-dried Schlenk flask equipped with a stirring bar. After three cycles of high vacuum evacuation and argon backfill of the flask, DMF (0.75 mL/mmol of amide substrate) was added and degassed for 5 minutes with argon. Next, the suspension was heated to 50 °C followed by a dropwise addition of trichloroethylene (1.1 eq.) over 5 to 10 minutes. The resulting mixture was stirred at 50 °C until

completion, as analysed by TLC. Cooled to room temperature, the mixture was partitioned between ethyl acetate and water (ca. EtOAc/H<sub>2</sub>O 2:1). Next, the organic layer was separated and further washed three times with water, and once with brine. The organic layer was then dried over Na<sub>2</sub>SO<sub>4</sub>, filtered, and the solvent was removed under reduced pressure. The crude mixtures were purified by column chromatography over silica gel (cyclohexane/ethyl acetate) if necessary.

### **General Procedure C: Synthesis of TIPS-protected Ynamides**

To a solution of 1-bromo-2-(triisopropylsilyl)acetylene (1.1 eq.) in toluene (0.5 M) were successively added amide (1.0 eq.), K<sub>2</sub>CO<sub>3</sub> or K<sub>3</sub>PO<sub>4</sub> (2.0 eq), CuSO<sub>4</sub>·5H<sub>2</sub>O (10 mol%) (homogeneous)<sup>[1]</sup> or Cu<sup>I</sup>-USY (8 mol%) (heterogeneous)<sup>[2]</sup> and 1,10-phenanthroline (20 mol%). The vial was capped and placed into a pre-heated aluminium block (60-110 °C) and stirred at 600 rpm until completion of the reaction. Next, the reaction mixture was filtrated over celite, washed with ethyl acetate or dichloromethane and the solvent was removed under reduced pressure. The crude mixtures were purified by column chromatography over silica gel (cyclohexane/ethyl acetate).

### **General Procedure D: Synthesis of Terminal Ynamides from 1,2-Dichloroenamides**

To a solution of 1,2-dichloroenamide (1.0 eq.) in freshly distilled THF (10 mL/mmol enamide) was added phenyllithium solution (1.9 M in Bu<sub>2</sub>O, 2.2 eq.) dropwise over 2-10 min under vigorous magnetic stirring at -78 °C. After completion (ca. 1 h at -78 °C), the mixture was quenched with diethyl ether/water (1:1) at -78 °C and let warm to room temperature. The two phases were separated, and the aqueous layer was extracted with diethyl ether (three times). The combined organic layers were washed once with saturated aqueous brine, dried over Na<sub>2</sub>SO<sub>4</sub> and the solvent was removed under reduced pressure. The crude mixtures were purified by column chromatography over silica gel (cyclohexane/ethyl acetate/triethylamine).

### **General Procedure E: Desilylation of TIPS-protected Ynamides**

To a solution of silylated ynamide (1.0 eq.) in freshly distilled THF (1 M) was added TBAF (1 M in THF, 1.1 eq.) dropwise over 2-3 min under vigorous magnetic stirring at -40 °C. After completion, the mixture was quenched with ethyl acetate/water (1:1) and let warm to room temperature. The two phases were separated, and the aqueous layer was extracted with ethyl acetate (three times). The combined organic layers were washed once with saturated aqueous brine, dried over Na<sub>2</sub>SO<sub>4</sub> and the solvent was removed under reduced pressure. The crude mixtures were purified by column chromatography over silica gel (cyclohexane/ethyl acetate/triethylamine).

### **General Procedure F: Synthesis of $\gamma$ -Amino-Ynamides**

Aldehyde or ketone (1.0 eq.), amine (1.0 eq.), terminal ynamide (1.0 eq.), Cu<sup>I</sup>-USY (3 mol%), and MS (4 Å, 75 mg/250  $\mu$ mol if indicated) are added to a 10 mL screw cap tube. When needed, EtOAc (0.15 mL/250  $\mu$ mol) is added and the tube is flushed with argon before sealing. The tube is placed into a pre-heated aluminium block at 30 °C and stirred until completion of starting material at 600 rpm. Next, the mixture was diluted with EtOAc (2 mL) and filtered over celite (wash with EtOAc). The crude product is purified by column chromatography over silica gel (cyclohexane/ethyl acetate/triethylamine).

## Recyclability Study

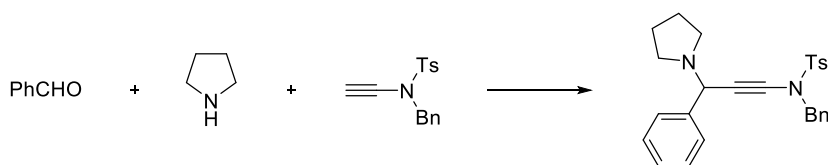

A recyclability study was performed following the optimised procedure on a 250  $\mu$ mol scale using benzaldehyde (26.5 mg), pyrrolidine (17.8 mg), TsBnN(CCH) (71.4 mg) and Cu<sup>I</sup>-USY (9.0 mg, 10 mol% Cu) in dry EtOAc (0.15 mL, HPLC grade). 1,3,5-trimethoxybenzene was added as internal standard for estimation of <sup>1</sup>H NMR yield. The reaction mixture was stirred for 15 min at 30 °C, then diluted with EtOAc (2 mL) and centrifuged (1000 rpm, 1 min). The supernatant was decanted, and centrifugation was repeated three times with EtOAc (2 mL) to wash the zeolite residue. The recovered zeolite was directly engaged in the next run.

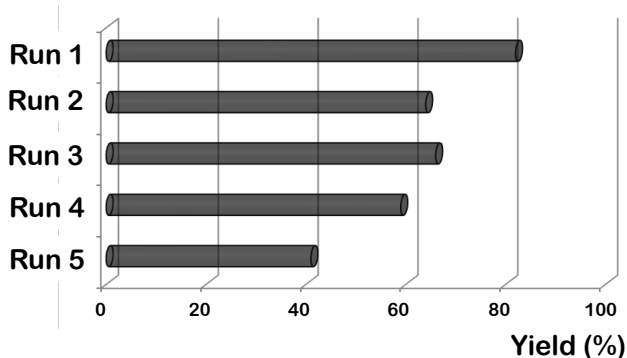

## IV. Analytical Description of Products

### Precursors of Terminal Ynamides

#### Sulfonamides

#### *N*-Benzyl-4-methylbenzenesulfonamide (CAS: 1576-37-0)<sup>[1]</sup>

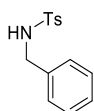

Chemical Formula: C<sub>14</sub>H<sub>15</sub>NO<sub>2</sub>S  
Molecular Weight: 261.34

Following the **General Procedure A**, the title compound was obtained as an off-white solid (2.51 g, 9.60 mmol) and used without further purification. Yield 99%. – R<sub>f</sub> = 0.13 (cyclohexane/EtOAc 9:1). – FTIR-ATR (neat) 3267, 3033, 2914, 1597, 1495, 1453, 1421, 1321, 1287, 1160, 1093, 1082, 1058, 1028, 874, 805, 740, 682 cm<sup>-1</sup>. – <sup>1</sup>H NMR (600 MHz, CDCl<sub>3</sub>)  $\delta$  = 7.78 – 7.75 (m, 2H), 7.33 – 7.24 (m, 5H), 7.22 – 7.18 (m, 2H), 4.62 (t, *J* = 6.1 Hz, 1H), 4.13 (d, *J* = 6.1 Hz, 2H), 2.44 (s, 3H) ppm. – <sup>13</sup>C NMR (126 MHz, CDCl<sub>3</sub>)  $\delta$  = 143.7, 136.9, 136.4, 129.9, 128.9, 128.1, 128.0, 127.3, 47.4, 21.7 ppm.

#### *N*-Benzyl-4-nitrobenzenesulfonamide (CAS: 52374-25-1)<sup>[2]</sup>

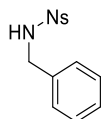

Chemical Formula: C<sub>13</sub>H<sub>12</sub>N<sub>2</sub>O<sub>4</sub>S  
Molecular Weight: 292.3090

Following the **General Procedure A**, the title compound was obtained as a yellow solid (5.44 g, 18.61 mmol) and used without further purification. Yield 98%. – R<sub>f</sub> = 0.28 (cyclohexane/EtOAc 8:2). – FTIR-ATR (neat) 3286, 3098, 3067, 2955, 2866, 2165, 1606, 1521, 1347, 1154, 1056, 856, 735 cm<sup>-1</sup>. – <sup>1</sup>H NMR (500 MHz, CDCl<sub>3</sub>)  $\delta$  = 8.40 – 8.25 (m, 2H), 8.06 – 7.89 (m, 2H), 7.30 – 7.25 (m, 3H), 7.20 – 7.15 (m, 2H), 4.89 (t, *J* = 6.0 Hz, 1H), 4.24 (d, *J* = 6.1 Hz, 2H) ppm. – <sup>13</sup>C NMR (126 MHz, CDCl<sub>3</sub>)  $\delta$  = 150.1, 146.1, 135.5, 129.0, 128.4, 128.0, 124.5, 53.6, 47.6 ppm. – MS (ESI-TOF, positive mode) *m/z* (rel intensity) 315.04 (100) [M+H]<sup>+</sup>.

### N-Benzylmethanesulfonamide (CAS: 3989-45-5)<sup>[2]</sup>

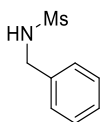

Chemical Formula: C<sub>8</sub>H<sub>11</sub>NO<sub>2</sub>S  
Molecular Weight: 185,2410

Following the **General Procedure A**, the title compound was obtained as a colourless solid (3.31 g, 11.32 mmol) and used without further purification. Yield 99%. – R<sub>f</sub> = 0.21 (cyclohexane/EtOAc 7:3). – FTIR-ATR (neat) 3224, 3062, 3034, 2016, 2934, 2864, 1605, 1493, 1455, 1293, 1160, 1081, 973, 874, 736 cm<sup>-1</sup>. – <sup>1</sup>H NMR (300 MHz, CDCl<sub>3</sub>) δ = 7.42 – 7.28 (m, 5H), 4.57 (br s, 1H), 4.33 (d, *J* = 6.1 Hz, 2H), 2.88 (s, 3H) ppm. – <sup>13</sup>C NMR (126 MHz, CDCl<sub>3</sub>) δ = 136.7, 129.1, 128.3, 128.0, 47.4, 41.3 ppm. – MS (ESI-TOF, positive mode) *m/z* (rel intensity) 208.04 (100) [M+H]<sup>+</sup>.

### 4-Methyl-N-phenylbenzenesulfonamide (CAS: 68-34-8)<sup>[3]</sup>

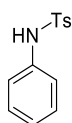

Chemical Formula: C<sub>13</sub>H<sub>13</sub>NO<sub>2</sub>S  
Molecular Weight: 247,3120

Following the **General Procedure A**, the title compound was obtained as an off-white solid (1.21 g, 4.90 mmol) and used without further purification. Yield 98%. – R<sub>f</sub> = 0.50 (cyclohexane/EtOAc 7:3). – FTIR-ATR (neat) 3234, 3103, 3028, 2970, 2897, 1597, 1481, 1414, 1335, 1153, 1090, 908, 817, 753, 693 cm<sup>-1</sup>. – <sup>1</sup>H NMR (300 MHz, CDCl<sub>3</sub>) δ = 7.67 – 7.61 (m, 2H), 7.27 – 7.19 (m, 4H), 7.15 – 7.08 (m, 1H), 7.07 – 7.03 (m, 2H), 6.42 (br s, 1H), 2.38 (s, 3H) ppm. – <sup>13</sup>C NMR (126 MHz, CDCl<sub>3</sub>) δ = 144.0, 136.5, 136.2, 129.8, 129.5, 127.4, 125.6, 121.9, 21.7 ppm.

### N-Allyl-4-methylbenzenesulfonamide (CAS: 50487-71-3)<sup>[4]</sup>

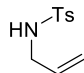

Chemical Formula: C<sub>10</sub>H<sub>13</sub>NO<sub>2</sub>S  
Molecular Weight: 211,2790

Following the **General Procedure A**, the title compound was obtained as a colourless solid (2.07 g, 9.80 mmol). Yield 98%. – R<sub>f</sub> = 0.43 (cyclohexane/EtOAc 7:3). – FTIR-ATR (neat) 3245, 2927, 2853, 2105, 1747, 1648, 1595, 1493, 1422, 1373, 1318, 1157, 1092, 1062, 935, 810, 664 cm<sup>-1</sup>. – <sup>1</sup>H NMR (300 MHz, CDCl<sub>3</sub>) δ = 7.78 – 7.73 (m, 2H), 7.35 – 7.29 (m, 2H), 5.73 (ddt, *J* = 17.1, 10.2, 5.8 Hz, 1H), 5.17 (dq, *J* = 17.1, 1.5 Hz, 1H), 5.10 (dq, *J* = 10.2, 1.3 Hz, 1H), 4.39 (t, *J* = 5.9 Hz, 1H), 3.59 (tt, *J* = 6.0, 1.5 Hz, 2H), 2.43 (s, 3H) ppm. – <sup>13</sup>C NMR (126 MHz, CDCl<sub>3</sub>) δ = 143.7, 137.1, 133.1, 129.9, 127.3, 117.9, 45.9, 21.7 ppm.

### 4-Methyl-N-(prop-2-yn-1-yl)benzenesulfonamide (CAS: 55022-46-3)<sup>[5]</sup>

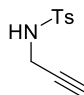

Chemical Formula: C<sub>10</sub>H<sub>11</sub>NO<sub>2</sub>S  
Molecular Weight: 209,2630

Following the **General Procedure A**, the title compound was isolated as a beige solid (2.69 g, 12.85 mmol) after recrystallisation in hot petrol ether and dichloromethane, followed by filtration of the residue over a silica plug washing with ethyl acetate. Yield 67%. – R<sub>f</sub> = 0.37 (cyclohexane/EtOAc 7:3). – FTIR-ATR (neat) 3265, 3023, 2935, 2860, 1596, 1493, 1436, 1291, 1157, 1062, 870, 696 cm<sup>-1</sup>. – <sup>1</sup>H NMR (300 MHz, CDCl<sub>3</sub>) δ = 7.97 – 7.59 (m, 2H), 7.44 – 7.16 (m, 2H), 4.60 (t, *J* = 5.9 Hz, 1H), 3.83 (dd, *J* = 6.1, 2.5 Hz, 2H), 2.43 (s, 3H), 2.11 (t, *J* = 2.5 Hz, 1H) ppm. – <sup>13</sup>C NMR (126 MHz, CDCl<sub>3</sub>) δ = 144.0, 136.6, 129.9, 127.5, 78.0, 73.2, 33.0, 21.7 ppm. – MS (ESI-TOF, positive mode) *m/z* (rel intensity) 232.04 (100) [M+Na]<sup>+</sup>.

Methyl 4-((4-methylphenyl)sulfonamido)butanoate (CAS: 118429-43-9)<sup>[6]</sup>

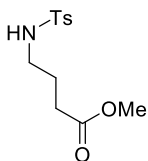

Chemical Formula: C<sub>12</sub>H<sub>17</sub>NO<sub>4</sub>S  
Molecular Weight: 271.3310

*N*-Tosylpyrrolidin-2-one (19.8 g, 82.75 mmol, 1.0 eq.) was added portionwise to a stirred solution of NaOMe (5.37 g, 99.30 mmol, 1.2 eq.) in MeOH (160 mL) at room temperature. Next, the mixture was heated at reflux for 30 min. The solvent was removed under reduced pressure and the residue was dissolved in EtOAc (250 mL). This organic phase was washed with H<sub>2</sub>O (3 × 100 mL). The combined aqueous phases were back-extracted with EtOAc (100 mL) and the combined organic phases were washed with brine (150 mL), dried over MgSO<sub>4</sub> and the solvent was removed under reduced pressure to yield a colourless solid (19.45 g, 71.68 mmol). Yield 87%. – R<sub>f</sub> = 0.30 (cyclohexane/EtOAc 6:4). – FTIR-ATR (neat) 3270, 2959, 2892, 2848, 1720, 1595, 1429, 1330, 1268, 1202, 1158, 1080, 1050, 977, 869, 819, 673 cm<sup>-1</sup>. – <sup>1</sup>H NMR (500 MHz, CDCl<sub>3</sub>) δ = 7.77 – 7.70 (m, 2H), 7.30 (d, *J* = 8.0 Hz, 2H), 4.68 (t, *J* = 6.3 Hz, 1H), 3.65 (s, 3H), 2.99 (q, *J* = 6.6 Hz, 2H), 2.42 (s, 3H), 2.35 (t, *J* = 7.1 Hz, 2H), 1.79 (quint, *J* = 6.9 Hz, 2H) ppm. – <sup>13</sup>C NMR (126 MHz, CDCl<sub>3</sub>) δ = 173.7, 143.6, 136.9, 129.9, 127.2, 51.9, 42.7, 31.1, 24.8, 21.7 ppm.

*N*-(2-(1*H*-Indol-3-yl)ethyl)-4-nitrobenzenesulfonamide (CAS: 33284-09-2)<sup>[7]</sup>

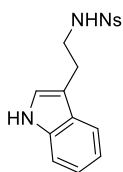

Chemical Formula: C<sub>16</sub>H<sub>15</sub>N<sub>3</sub>O<sub>4</sub>S  
Molecular Weight: 345.3730

Following the **General Procedure A**, the title compound was obtained as a yellow solid (4.30 g, 12.45 mmol) and used without further purification. R<sub>f</sub> = 0.75 (CH<sub>2</sub>Cl<sub>2</sub>/MeOH 9:1). – FTIR-ATR (neat) 3410, 3242, 3109, 3086, 3071, 3049, 3039, 2986, 2958, 2909, 2895, 2856, 1610, 1529, 1436, 1346, 1305, 1149, 1069, 912, 854, 739 cm<sup>-1</sup>. – <sup>1</sup>H NMR (500 MHz, CDCl<sub>3</sub>) δ = 8.14 – 8.07 (m, 2H), 8.01 (br s, 1H), 7.80 – 7.73 (m, 2H), 7.35 – 7.29 (m, 2H), 7.21 – 7.13 (m, 1H), 7.06 – 6.96 (m, 2H), 4.45 (t, *J* = 5.8 Hz, 1H), 3.36 (q, *J* = 6.2 Hz, 2H), 2.97 (t, *J* = 6.3 Hz, 2H) ppm. – <sup>13</sup>C NMR (126 MHz, CDCl<sub>3</sub>) δ = 149.8, 145.4, 136.5, 128.0, 126.6, 124.1, 122.7(8), 122.7(6), 119.9, 118.4, 111.5, 111.3, 43.1, 25.6 ppm.

*tert*-Butyl 3-(2-((4-nitrophenyl)sulfonamido)ethyl)-1*H*-indole-1-carboxylate (CAS: 1627199-33-0)<sup>[8]</sup>

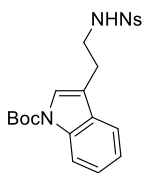

Chemical Formula: C<sub>21</sub>H<sub>23</sub>N<sub>3</sub>O<sub>6</sub>S  
Molecular Weight: 445.4900

The title compound was prepared as described in the literature<sup>[8]</sup> and was isolated as a yellow foam (1.28 g, 2.87 mmol) after column chromatography (EtOAc/CH<sub>2</sub>Cl<sub>2</sub>/cyclohexane 1:1:8) on only a fraction of the crude mixture. R<sub>f</sub> = 0.48 (cyclohexane/EtOAc 7:3). – FTIR-ATR (neat) 3396, 3103, 3068, 3039, 2977, 2934, 2909, 2852, 1711, 1607, 1531, 1457, 1343, 1293, 1140, 1082, 1010, 912, 842, 736, 642 cm<sup>-1</sup>. – <sup>1</sup>H NMR (500 MHz, CDCl<sub>3</sub>) δ = 8.28 – 8.22 (m, 2H), 8.02 (br s, 1H), 7.99 – 7.94 (m, 2H), 7.69 (d, *J* = 7.9 Hz, 1H), 7.38 (d, *J* = 8.1 Hz, 1H), 7.22 (t, *J* = 7.5 Hz, 1H), 7.13 (t, *J* = 7.4 Hz, 1H), 7.06 (d, *J* = 2.4 Hz, 1H), 4.17 – 4.09 (m, 2H), 3.27 – 3.19 (m, 2H), 1.32 (s, 9H) ppm. – <sup>13</sup>C NMR (126 MHz, CDCl<sub>3</sub>) δ = 150.7, 150.2, 145.7, 136.3, 129.4, 127.5, 123.9, 122.7, 122.5, 119.8, 118.9, 112.2, 111.3, 85.2, 48.2, 27.9, 26.2 ppm. – MS (ESI-TOF, positive mode) *m/z* (rel intensity) 484.09 (50) [M+K]<sup>+</sup>.

## 1,2-Dichloroenamides

1,2-Dichloroenamides were prepared following a reported procedure.<sup>[9]</sup>

### (E)-N-Benzyl-N-(1,2-dichlorovinyl)-4-methylbenzenesulfonamide (CAS: 1637778-11-

0)

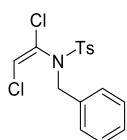

Chemical Formula: C<sub>16</sub>H<sub>15</sub>Cl<sub>2</sub>NO<sub>2</sub>S  
Molecular Weight: 356,2610

Following the **General Procedure B**, the title compound was obtained as a colourless solid (6.52 g, 18.31 mmol) and used without further purification. Yield 94%. – R<sub>f</sub> = 0.73 (cyclohexane/EtOAc 7:3). – FTIR-ATR (neat) 3079, 3035, 2973, 2922, 2876, 1595, 1496, 1457, 1356, 1168, 1085, 1029, 952, 814, 693 cm<sup>-1</sup>. – <sup>1</sup>H NMR (300 MHz, CDCl<sub>3</sub>) δ = 7.91 – 7.81 (m, 2H), 7.41 – 7.27 (m, 7H), 6.27 (s, 1H), 4.40 (br s, 2H), 2.47 (s, 3H) ppm. – <sup>13</sup>C NMR (126 MHz, CDCl<sub>3</sub>) δ = 144.9, 135.2, 133.5, 129.9, 129.5(2), 129.5(0), 128.6(1), 128.6(0), 128.5, 121.9, 51.9, 21.9 ppm. – MS (ESI-TOF, positive mode) *m/z* (rel intensity) 393.98 (100) [M+K]<sup>+</sup>.

### (E)-N-(1,2-dichlorovinyl)-4-methyl-N-phenylbenzenesulfonamide (CAS: 1198340-49-6)

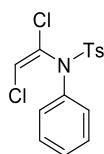

Chemical Formula: C<sub>15</sub>H<sub>13</sub>Cl<sub>2</sub>NO<sub>2</sub>S  
Molecular Weight: 342,2340

Following the **General Procedure B**, the title compound was isolated as a colourless solid (1.16 g, 3.38 mmol) after column chromatography over silica gel (cyclohexane/EtOAc). Yield 83%. – R<sub>f</sub> = 0.42 (cyclohexane/EtOAc 9:1). – FTIR-ATR (neat) 3076, 3034, 2954, 2920, 2853, 1592, 1487, 1360, 1288, 1163, 1087, 944, 801, 698 cm<sup>-1</sup>. – <sup>1</sup>H NMR (300 MHz, CDCl<sub>3</sub>) δ = 7.68 – 7.61 (m, 2H), 7.40 – 7.29 (m, 5H), 7.27 – 7.21 (m, 2H), 6.46 (s, 1H), 2.43 (s, 3H) ppm. – <sup>13</sup>C NMR (126 MHz, CDCl<sub>3</sub>) δ = 144.7, 137.8, 135.6, 130.7, 129.5(4), 129.5(0), 129.2, 128.9, 128.7, 120.7, 21.8 ppm. – MS (ESI-TOF, positive mode) *m/z* (rel intensity) 379.96 (100) [M+K]<sup>+</sup>.

### (E)-N-Allyl-N-(1,2-dichlorovinyl)-4-methylbenzenesulfonamide

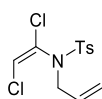

Chemical Formula: C<sub>12</sub>H<sub>13</sub>Cl<sub>2</sub>NO<sub>2</sub>S  
Molecular Weight: 306,2010

Following the **General Procedure B**, the title compound was obtained as a light brown waxy solid (2.76 g, 9.01 mmol) and used without further purification. Yield 95%. – R<sub>f</sub> = 0.65 (cyclohexane/EtOAc 7:3). – FTIR-ATR (neat) 3088, 2983, 2923, 2870, 1597, 1495, 1446, 1358, 1291, 1163, 1088, 1041, 936, 804, 661 cm<sup>-1</sup>. – <sup>1</sup>H NMR (500 MHz, CDCl<sub>3</sub>) δ = 7.80 (d, J = 8.3 Hz, 2H), 7.33 (d, J = 8.1 Hz, 2H), 6.46 (s, 1H), 5.76 (ddt, J = 16.9, 10.1, 6.8 Hz, 1H), 5.31 – 5.15 (m, 2H), 3.87 (br s, 2H), 2.44 (s, 3H) ppm. – <sup>13</sup>C NMR (126 MHz, CDCl<sub>3</sub>) δ = 144.8, 135.2, 130.8, 129.8, 129.6, 128.5, 121.7, 120.8, 51.1, 21.8 ppm. – HRMS (ESI-TOF, positive mode): *m/z*: calcd for C<sub>12</sub>H<sub>13</sub>Cl<sub>2</sub>NNaO<sub>2</sub>S 327.9936, found 327.9925 [M+Na]<sup>+</sup>.

## TIPS-protected ynamides

### *N*-Benzyl-4-nitro-*N*-((triisopropylsilyl)ethynyl)benzenesulfonamide

(CAS: 945536-25-4)<sup>[10]</sup>

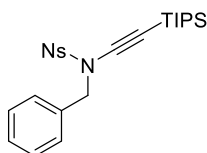

Chemical Formula: C<sub>24</sub>H<sub>32</sub>N<sub>2</sub>O<sub>4</sub>SSi  
Molecular Weight: 472,6750

Following the **General Procedure C** using K<sub>2</sub>CO<sub>3</sub> and Cu<sup>I</sup>-USY at 90 °C for two days, the title compound was isolated as a colourless solid (1.16 g, 2.45 mmol). Yield 80%. – R<sub>f</sub> = 0.73 (cyclohexane/EtOAc 7:3). – FTIR-ATR (neat) 3107, 2954, 2939, 2890, 2863, 2165, 1608, 1530, 1462, 1378, 1348, 1311, 1173, 1087, 1011, 941, 857, 781, 673 cm<sup>-1</sup>. – <sup>1</sup>H NMR (500 MHz, CDCl<sub>3</sub>) δ = 8.28 – 8.22 (m, 2H), 7.96 – 7.89 (m, 2H), 7.31 – 7.21 (m, 5H), 4.58 (br s, 2H), 0.96 (br s, 21H) ppm. – <sup>13</sup>C NMR (126 MHz, CDCl<sub>3</sub>) δ = 150.5, 143.1, 133.8, 129.1, 129.0, 128.8, 128.7, 124.1, 95.5, 71.4, 56.3, 18.6, 11.3 ppm. – HRMS (ESI-TOF, positive mode): *m/z*: calcd for C<sub>24</sub>H<sub>32</sub>N<sub>2</sub>NaO<sub>4</sub>SSi 495.1744, found 495.1773 [M+Na]<sup>+</sup>.

### *N*-Benzyl-*N*-((triisopropylsilyl)ethynyl)methanesulfonamide (CAS: 1160723-59-0)<sup>[11]</sup>

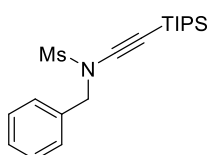

Chemical Formula: C<sub>19</sub>H<sub>31</sub>NO<sub>2</sub>SSi  
Molecular Weight: 365,6070

Following the **General Procedure C** using K<sub>2</sub>CO<sub>3</sub> and Cu<sup>I</sup>-USY at 60 °C for 18 h, the title compound was isolated as a yellow oil (1.72 g, 4.70 mmol). Yield 95%. – R<sub>f</sub> = 0.80 (cyclohexane/EtOAc 7:3). – FTIR-ATR (neat) 3091, 3066, 3034, 2942, 2891, 2864, 2726, 2162, 1459, 1360, 1162, 1016, 961, 882, 781, 675 cm<sup>-1</sup>. – <sup>1</sup>H NMR (500 MHz, CDCl<sub>3</sub>) δ = 7.47 – 7.42 (m, 2H), 7.39 – 7.34 (m, 3H), 4.61 (s, 2H), 2.87 (s, 3H), 1.02 (s, 21H) ppm. – <sup>13</sup>C NMR (126 MHz, CDCl<sub>3</sub>) δ = 134.5, 129.2, 128.9, 128.8(6), 96.2, 71.0, 55.8, 38.6, 18.7, 11.4 ppm. – MS (ESI-TOF, positive mode) *m/z* (rel intensity) 405.15 (80) [M+K]<sup>+</sup>.

### 4-Methyl-*N*-(prop-2-yn-1-yl)-*N*-((triisopropylsilyl)ethynyl)benzenesulfonamide

(CAS: 898827-45-7)<sup>[12]</sup>

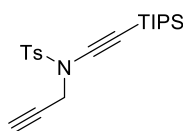

Chemical Formula: C<sub>21</sub>H<sub>31</sub>NO<sub>2</sub>SSi  
Molecular Weight: 389,6290

Following the **General Procedure C** using K<sub>2</sub>CO<sub>3</sub> and Cu<sup>I</sup>-USY at 65 °C for 21 h, the title compound was isolated as an orange oil (636 mg, 1.63 mmol). Yield 80%. – R<sub>f</sub> = 0.70 (cyclohexane/EtOAc 7:3). – FTIR-ATR (neat) 3277, 2943, 2865, 2168, 1598, 1463, 1537, 1259, 1163, 1088, 1031, 881, 729, 663 cm<sup>-1</sup>. – <sup>1</sup>H NMR (500 MHz, CDCl<sub>3</sub>) δ = 7.83 (d, *J* = 8.3 Hz, 2H), 7.31 (d, *J* = 8.0 Hz, 2H), 4.26 (d, *J* = 2.6 Hz, 2H), 2.45 (s, 3H), 2.16 (t, *J* = 2.5 Hz, 1H), 1.03 (s, 21H) ppm. – <sup>13</sup>C NMR (126 MHz, CDCl<sub>3</sub>) δ = 145.0, 134.1, 129.6, 128.4, 95.4, 75.9, 74.7, 70.5, 41.8, 21.8, 18.7, 11.4 ppm. – MS (ESI-TOF, positive mode) *m/z* (rel intensity) 412.17 (100) [M+Na]<sup>+</sup>.

### Methyl 4-((4-methyl-*N*-((triisopropylsilyl)ethynyl)phenyl)sulfonamido)butanoate

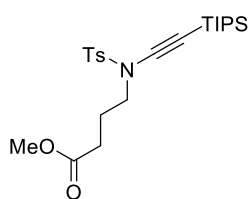

Chemical Formula: C<sub>23</sub>H<sub>37</sub>NO<sub>4</sub>SSi  
Molecular Weight: 451,6970

Following the **General Procedure C** using K<sub>2</sub>CO<sub>3</sub> and CuSO<sub>4</sub>•5H<sub>2</sub>O at 65 °C for 18 h, the title compound was isolated as a pale-yellow viscous oil (201 mg, 445 μmol). Yield 89%. – R<sub>f</sub> = 0.44 (cyclohexane/EtOAc 8:2). – FTIR-ATR (neat) 2942, 2892, 2863, 2158, 1743, 1596, 1435, 1365, 1167, 1089, 1002, 945, 881, 816, 658 cm<sup>-1</sup>. – <sup>1</sup>H NMR (500 MHz, CDCl<sub>3</sub>) δ = 7.82 – 7.76 (m, 2H), 7.32 (d, *J* = 8.0 Hz, 2H), 3.67 (s, 3H), 3.38 (t, *J* = 6.6 Hz, 2H), 2.44 (s, 3H), 2.41 (t, *J* = 7.3 Hz, 2H), 1.98 (quint, *J* = 7.0 Hz, 2H), 1.04 (s, 21H) ppm. – <sup>13</sup>C NMR (126 MHz, CDCl<sub>3</sub>) δ = 173.2, 144.8, 134.5, 129.8, 127.8, 96.0, 69.8, 51.8, 50.6, 30.5, 23.1, 21.8, 18.7, 11.5 ppm. – HRMS (ESI-TOF, positive mode): *m/z*: calcd for C<sub>23</sub>H<sub>37</sub>NNaO<sub>4</sub>SSi 474.2105, found 474.2112 [M+Na]<sup>+</sup>.

### *N*-(2-(1*H*-Indol-3-yl)ethyl)-4-nitro-*N*-((triisopropylsilyl)ethynyl)benzenesulfonamide

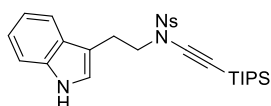

Chemical Formula: C<sub>27</sub>H<sub>35</sub>N<sub>3</sub>O<sub>4</sub>SSi  
Molecular Weight: 525,7390

Following the **General Procedure C** using K<sub>2</sub>CO<sub>3</sub> and CuSO<sub>4</sub>•5H<sub>2</sub>O at 85 – 95 °C for 13 days, the title compound was isolated as a brown resin (118 mg, 225 μmol) from *tert*-butyl 3-(2-((4-nitrophenyl)sulfonamido)ethyl)-1*H*-indole-1-carboxylate. \* Yield 45%. – R<sub>f</sub> = 0.61 (cyclohexane/EtOAc 7:3). – FTIR-ATR (neat) 3291, 3104, 2941, 2890, 2863, 2169, 1650, 1529, 1458, 1159, 919, 792, 735 cm<sup>-1</sup>. – <sup>1</sup>H NMR (500 MHz, CDCl<sub>3</sub>) δ = 8.14 – 8.09 (m, 2H), 7.82 – 7.77 (m, 2H), 7.42 (d, *J* = 8.1 Hz, 1H), 7.34 – 7.27 (m, 2H), 7.15 – 7.10 (m, 1H), 7.00 (s, 1H), 4.67 (s, 1H), 3.37 (q, *J* = 5.6 Hz, 2H), 2.91 (t, *J* = 6.4 Hz, 2H), 1.21 – 1.15 (m, 21H) ppm. – <sup>13</sup>C NMR (126 MHz, CDCl<sub>3</sub>) δ = 149.8, 145.4, 138.7, 128.0, 127.0, 126.6, 124.3, 124.1, 122.1, 118.8, 114.0, 111.8, 93.9, 69.5, 42.8, 25.6, 18.9, 11.5 ppm. – HRMS (ESI-TOF, positive mode): *m/z*: calcd for C<sub>27</sub>H<sub>35</sub>KN<sub>3</sub>O<sub>4</sub>SSi 564.1749, found 564.1733 [M+K]<sup>+</sup>.

\*N.B.: Boc-deprotection occurred under the above stated reaction conditions and was not performed as an additional step.

### 1-((Triisopropylsilyl)ethynyl)pyrrolidin-2-one (CAS: 1007597-70-7)<sup>[13]</sup>

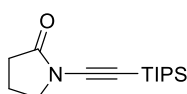

Chemical Formula: C<sub>15</sub>H<sub>27</sub>NOSi  
Molecular Weight: 265,4720

Following the **General Procedure C** using K<sub>2</sub>CO<sub>3</sub> and Cu<sup>I</sup>-USY at 105 °C, the title compound was isolated as a colourless solid (138 mg, 520 μmol). Yield 43%. – R<sub>f</sub> = 0.43 (cyclohexane/EtOAc 7:3). – FTIR-ATR (neat) 2940, 2892, 2863, 2725, 2168, 1719, 1460, 1381, 1460, 1381, 1191, 882, 672, 501 cm<sup>-1</sup>. – <sup>1</sup>H NMR (300 MHz, CDCl<sub>3</sub>) δ = 3.75 – 3.66 (m, 2H), 2.46 – 2.38 (m, 2H), 2.18 – 2.05 (m, 2H), 1.12 – 1.06 (m, 21H) ppm. – <sup>13</sup>C NMR (126 MHz, CDCl<sub>3</sub>) δ = 175.8, 94.7, 70.8, 50.1, 29.7, 18.8, 18.6, 11.3 ppm – MS (ESI-TOF, positive mode) *m/z* (rel intensity) 288.18 (100) [M+Na]<sup>+</sup>.



### 3-((Triisopropylsilyl)ethynyl)oxazolidin-2-one (CAS: 1007597-70-7)<sup>[13]</sup>

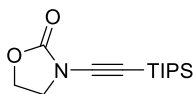

Chemical Formula: C<sub>14</sub>H<sub>25</sub>NO<sub>2</sub>Si  
Molecular Weight: 267,4440

Following the **General Procedure C** using K<sub>2</sub>CO<sub>3</sub> and Cu<sup>I</sup>-USY at 110 °C for 21 h, the title compound was isolated as a colourless solid (110 mg, 411 μmol). Yield 82%. – R<sub>f</sub> = 0.43 (cyclohexane/EtOAc 7:3). – FTIR-ATR (neat) 2960, 2942, 2889, 2864, 2177, 1758, 1478, 1463, 1397, 1296, 1197, 1104, 1034, 992, 881, 809, 751, 707 cm<sup>-1</sup>. – <sup>1</sup>H NMR (500 MHz, CDCl<sub>3</sub>) δ = 4.47 – 4.39 (m, 2H), 3.98 – 3.90 (m, 2H), 1.08 (s, 21H) ppm. – <sup>13</sup>C NMR (126 MHz, CDCl<sub>3</sub>) δ = 155.9, 93.1, 70.2, 62.9, 47.1, 18.7, 11.3 ppm. – MS (ESI-TOF, positive mode) *m/z* (rel intensity) 290.15 (60) [M+Na]<sup>+</sup>.

### 1-(1-((Triisopropylsilyl)ethynyl)-1H-indol-3-yl)ethan-1-one (CAS: 1007597-74-1)<sup>[13]</sup>

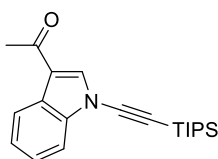

Chemical Formula: C<sub>21</sub>H<sub>29</sub>NOSi  
Molecular Weight: 339,5540

Following the **General Procedure C** using K<sub>2</sub>CO<sub>3</sub> and Cu<sup>I</sup>-USY at 90 °C for two days, the title compound was isolated as an orange solid (932 mg, 2.75 mmol). Yield 87%. – R<sub>f</sub> = 0.53 (cyclohexane/EtOAc 7:3). – FTIR-ATR (neat) 3116, 3055, 2942, 2891, 2864, 2379, 2177, 1738, 1633, 1613, 1533, 1456, 1205, 882, 670 cm<sup>-1</sup>. – <sup>1</sup>H NMR (500 MHz, CDCl<sub>3</sub>) δ = 8.36 (d, *J* = 7.7 Hz, 1H), 7.87 (s, 1H), 7.54 (d, *J* = 8.0 Hz, 1H), 7.44 – 7.34 (m, 2H), 2.56 (s, 3H), 1.20 – 1.14 (m, 21H) ppm. – <sup>13</sup>C NMR (126 MHz, CDCl<sub>3</sub>) δ = 193.1, 138.8, 135.5, 125.2, 125.1, 124.4, 123.1, 119.6, 111.5, 92.8, 71.2, 27.9, 18.8, 11.4 ppm. – MS (ESI-TOF, positive mode) *m/z* (rel intensity) 362.19 (100) [M+Na]<sup>+</sup>.

## Terminal Ynamides

### *N*-Benzyl-*N*-ethynyl-4-methylbenzenesulfonamide (CAS: 205885-39-8)<sup>[14]</sup>

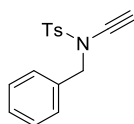

Chemical Formula: C<sub>16</sub>H<sub>15</sub>NO<sub>2</sub>S  
Molecular Weight: 285,3610

Following the **General Procedure D**, the title compound **3** was isolated as a colourless solid (4.0 g, 14.02 mmol). Yield 93%. – R<sub>f</sub> = 0.55 (cyclohexane/EtOAc 9:1). – FTIR-ATR (neat) 3275, 3062, 2963, 2929, 2132, 1596, 1495, 1431, 1356, 1164, 1087, 1026, 930, 798, 689 cm<sup>-1</sup>. – <sup>1</sup>H NMR (400 MHz, CDCl<sub>3</sub>) δ = 7.78 – 7.74 (m, 2H), 7.34 – 7.27 (m, 7H), 4.50 (s, 2H), 2.67 (s, 1H), 2.45 (s, 3H) ppm. – <sup>13</sup>C NMR (126 MHz, CDCl<sub>3</sub>) δ = 144.9, 134.8, 134.4, 129.9, 128.8, 128.7, 128.5, 127.9, 76.4, 59.8, 55.4, 21.8 ppm. – MS (ESI-TOF, positive mode) *m/z* (rel intensity) 324.05 (100) [M+K]<sup>+</sup>, 155.02 (25) [C<sub>7</sub>H<sub>7</sub>O<sub>2</sub>S]<sup>+</sup>.

### *N*-Benzyl-*N*-ethynyl-4-nitrobenzenesulfonamide (CAS: 329354-15-6)<sup>[10]</sup>

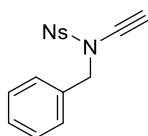

Chemical Formula: C<sub>15</sub>H<sub>12</sub>N<sub>2</sub>O<sub>4</sub>S  
Molecular Weight: 316,3310

Following the **General Procedure E**, the title compound was isolated as an off-white solid (49 mg, 155 μmol). Yield 84%. – R<sub>f</sub> = 0.90 (cyclohexane/EtOAc 7:3). – FTIR-ATR (neat) 3279, 3126, 3106, 3068, 3031, 2998, 2956, 2923, 2854, 2133, 1524, 1344, 1303, 1175, 1087, 1024, 852, 686 cm<sup>-1</sup>. – <sup>1</sup>H NMR (500 MHz, CDCl<sub>3</sub>) δ = 8.32 – 8.26 (m, 2H), 7.98 – 7.91 (m, 2H), 7.34 – 7.27 (m, 5H), 4.60 (s, 2H), 2.78 (s, 1H) ppm. – <sup>13</sup>C NMR (126 MHz, CDCl<sub>3</sub>) δ = 150.6, 143.1, 133.7, 129.0, 128.9(6), 128.9(0), 128.8, 124.3, 75.6, 60.5, 56.1 ppm. – MS (ESI-TOF, positive mode) *m/z* (rel intensity) 317.06 (30) [M+H]<sup>+</sup>.

### N-Benzyl-N-ethynylmethanesulfonamide (CAS: 737004-80-7)<sup>[15]</sup>

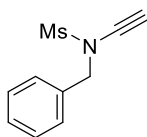

Chemical Formula: C<sub>10</sub>H<sub>11</sub>NO<sub>2</sub>S  
Molecular Weight: 209,2630

Following the **General Procedure E**, the title compound was isolated as an off-white solid (85 mg, 406 μmol). Yield 81%. – R<sub>f</sub> = 0.44 (cyclohexane/EtOAc 7:3). – FTIR-ATR (neat) 3273, 3065, 3033, 3015, 2930, 2852, 2494, 2293, 2133, 2063, 1496, 1456, 1341, 1154, 1020, 924, 784, 698 cm<sup>-1</sup>. – <sup>1</sup>H NMR (500 MHz, CDCl<sub>3</sub>) δ = 7.47 – 7.43 (m, 2H), 7.42 – 7.34 (m, 3H), 4.63 (s, 2H), 2.89 (s, 3H), 2.84 (s, 1H) ppm. – <sup>13</sup>C NMR (126 MHz, CDCl<sub>3</sub>) δ = 134.4, 129.0, 128.9(9), 128.9(6), 76.0, 60.3, 55.5, 39.0 ppm. – MS (ESI-TOF, positive mode) *m/z* (rel intensity) 232.04 (100) [M+Na]<sup>+</sup>.

### N-Ethynyl-4-methyl-N-phenylbenzenesulfonamide (CAS: 312329-87-6)<sup>[9]</sup>

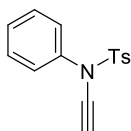

Chemical Formula: C<sub>15</sub>H<sub>13</sub>NO<sub>2</sub>S  
Molecular Weight: 271,3340

Following the **General Procedure D**, the title compound was isolated as a colourless solid (554 mg, 2.04 mmol) after recrystallization in refluxed Et<sub>2</sub>O. Yield 68%. – R<sub>f</sub> = 0.54 (cyclohexane/EtOAc 8:2). – FTIR-ATR (neat) 3293, 3065, 3042, 2955, 2924, 2130, 1697, 1595, 1556, 1488, 1371, 1293, 1173, 1089, 925, 813, 761, 673 cm<sup>-1</sup>. – <sup>1</sup>H NMR (500 MHz, CDCl<sub>3</sub>) δ = 7.62 – 7.57 (m, 2H), 7.37 – 7.24 (m, 7H), 2.85 (s, 1H), 2.46 (s, 3H) ppm. – <sup>13</sup>C NMR (126 MHz, CDCl<sub>3</sub>) δ = 145.2, 138.4, 133.0, 129.7, 129.3, 128.6, 128.4, 126.4, 76.7, 59.0, 21.9 ppm.

### N-Allyl-N-ethynyl-4-methylbenzenesulfonamide (CAS: 312329-85-4)<sup>[10]</sup>

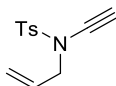

Chemical Formula: C<sub>12</sub>H<sub>13</sub>NO<sub>2</sub>S  
Molecular Weight: 235,3010

Following the **General Procedure D**, the title compound was isolated as pale-yellow solid (167 mg, 710 μmol). Yield 71%. – R<sub>f</sub> = 0.60 (cyclohexane/EtOAc 7:3). – FTIR-ATR (neat) 3270, 2925, 2137, 1647, 1594, 1490, 1429, 1352, 1294, 1159, 1118, 1086, 1032, 991, 921, 899, 814, 739, 709, 659 cm<sup>-1</sup>. – <sup>1</sup>H NMR (500 MHz, CDCl<sub>3</sub>) δ = 7.84 – 7.78 (m, 2H), 7.35 (d, *J* = 8.0 Hz, 2H), 5.72 (ddt, *J* = 16.6, 10.1, 6.3 Hz, 1H), 5.29 – 5.19 (m, 2H), 3.96 (dt, *J* = 6.4, 1.3 Hz, 2H), 2.73 (s, 1H), 2.46 (s, 3H) ppm. – <sup>13</sup>C NMR (126 MHz, CDCl<sub>3</sub>) δ = 145.0, 134.8, 130.7, 129.9, 127.9, 120.3, 76.0, 59.4, 54.1, 21.8 ppm. – MS (ESI-TOF, positive mode) *m/z* (rel intensity) 258.05 (20) [M+Na]<sup>+</sup>.

### N-Ethynyl-4-methyl-N-(prop-2-yn-1-yl)benzenesulfonamide (CAS: 2445280-24-8)<sup>[16]</sup>

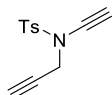

Chemical Formula: C<sub>12</sub>H<sub>11</sub>NO<sub>2</sub>S  
Molecular Weight: 233,2850

Following the **General Procedure E**, the title compound was isolated as yellow oil (93 mg, 399 μmol). Yield 52%. – R<sub>f</sub> = 0.70 (cyclohexane/EtOAc 7:3). – FTIR-ATR (neat) 3286, 2985, 2921, 2853, 2168, 1594, 1426, 1534, 1160, 1045, 599, 812, 705, 654 cm<sup>-1</sup>. – <sup>1</sup>H NMR (500 MHz, CDCl<sub>3</sub>) δ = 7.87 – 7.83 (m, 2H), 7.35 (d, *J* = 8.0 Hz, 2H), 4.27 (d, *J* = 2.5 Hz, 2H), 2.80 (s, 1H), 2.46 (s, 3H), 2.20 (t, *J* = 2.5 Hz, 1H) ppm. – <sup>13</sup>C NMR (126 MHz, CDCl<sub>3</sub>) δ = 145.3, 134.1, 129.8, 128.3, 75.6, 75.3, 74.8, 60.0, 41.5, 21.9 ppm. – HRMS (ESI-TOF, positive mode): *m/z*: calcd for C<sub>12</sub>H<sub>11</sub>NO<sub>2</sub>SNa 256.0403, found 256.0411 [M+Na]<sup>+</sup>.

### Methyl 4-((*N*-ethynyl-4-methylphenyl)sulfonamido)butanoate

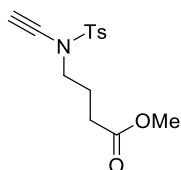

Chemical Formula:  
C<sub>14</sub>H<sub>17</sub>NO<sub>4</sub>S  
Molecular Weight: 295,3530

Following the **General Procedure E**, the title compound was isolated as an off-white solid (119 mg, 263  $\mu$ mol). Yield 62%. –  $R_f$  = 0.43 (cyclohexane/EtOAc 7:3). – FTIR-ATR (neat) 3264, 3054, 3000, 2955, 2925, 2852, 2135, 1738, 1598, 1438, 1355, 1167, 1099, 968, 808, 708, 652  $\text{cm}^{-1}$ . –  $^1\text{H}$  NMR (500 MHz,  $\text{CDCl}_3$ )  $\delta$  = 7.83 – 7.75 (m, 2H), 7.35 (d,  $J$  = 8.2 Hz, 2H), 3.68 (s, 3H), 3.37 (t,  $J$  = 6.8 Hz, 2H), 2.74 (s, 1H), 2.45 (s, 3H), 2.40 (t,  $J$  = 7.3 Hz, 2H), 1.98 (quint,  $J$  = 7.0 Hz, 2H) ppm. –  $^{13}\text{C}$  NMR (126 MHz,  $\text{CDCl}_3$ )  $\delta$  = 173.2, 145.0, 134.5, 130.0, 127.8, 75.8, 59.5, 51.9, 50.5, 30.4, 23.0, 21.8 ppm. – HRMS (ESI-TOF, positive mode):  $m/z$ : calcd for C<sub>14</sub>H<sub>17</sub>NNaO<sub>4</sub>S 318.0770, found 318.0783  $[\text{M}+\text{Na}]^+$ .

### *N*-(2-(1*H*-Indol-3-yl)ethyl)-*N*-ethynyl-4-nitrobenzenesulfonamide

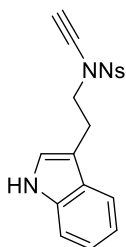

Chemical Formula: C<sub>18</sub>H<sub>15</sub>N<sub>3</sub>O<sub>4</sub>S  
Molecular Weight: 369,40

Following the **General Procedure E**, the title compound was isolated as an orange sticky solid (58 mg, 157  $\mu$ mol). Yield 87%. –  $R_f$  = 0.38 (cyclohexane/EtOAc 7:3). – FTIR-ATR (neat) 3273, 3104, 2937, 2890, 2855, 2147, 1607, 1523, 1457, 1346, 1311, 1226, 1152, 1090, 1011, 914, 851, 735, 682  $\text{cm}^{-1}$ . –  $^1\text{H}$  NMR (500 MHz,  $\text{CDCl}_3$ )  $\delta$  = 8.11 – 8.04 (m, 2H), 7.76 – 7.69 (m, 2H), 7.41 (d,  $J$  = 8.2 Hz, 1H), 7.32 (d,  $J$  = 7.8 Hz, 1H), 7.28 (t,  $J$  = 7.7 Hz, 1H), 7.13 (t,  $J$  = 7.5 Hz, 1H), 6.90 (s, 1H), 4.94 – 4.35 (m, 1H), 3.38 (t,  $J$  = 6.3 Hz, 2H), 3.12 (s, 1H), 2.88 (t,  $J$  = 6.3 Hz, 2H) ppm. –  $^{13}\text{C}$  NMR (126 MHz,  $\text{CDCl}_3$ )  $\delta$  = 149.8, 145.5, 138.6, 127.9, 126.8, 126.7, 124.4, 124.1, 122.2, 118.9, 114.5, 111.7, 73.7, 59.5, 42.9, 25.5 ppm.

### 1-Ethynylpyrrolidin-2-one (CAS: 1312921-13-3)<sup>[17]</sup>

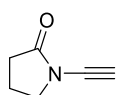

Chemical Formula: C<sub>6</sub>H<sub>7</sub>NO  
Molecular Weight: 109,1280

Following the **General Procedure E**, the title compound was isolated as a colourless solid (36 mg, 330  $\mu$ mol). Yield 27%. –  $R_f$  = 0.19 (cyclohexane/EtOAc 7:3). – FTIR-ATR (neat) 3399, 3216, 2962, 2924, 2901, 2854, 2771, 2136, 1704, 1456, 1261, 1193, 1022, 929, 802, 635  $\text{cm}^{-1}$ . –  $^1\text{H}$  NMR (500 MHz,  $\text{CDCl}_3$ )  $\delta$  = 3.71 (t,  $J$  = 7.2 Hz, 2H), 2.92 (s, 1H), 2.45 (t,  $J$  = 8.1 Hz, 2H), 2.19 – 2.10 (m, 2H) ppm. –  $^{13}\text{C}$  NMR (126 MHz,  $\text{CDCl}_3$ )  $\delta$  = 176.7, 74.0, 61.0, 49.6, 29.6, 19.0 ppm. – MS (ESI-TOF, positive mode)  $m/z$  (rel intensity) 132.04 (50)  $[\text{M}+\text{Na}]^+$ .

### 3-Ethynylloxazolidin-2-one (CAS: 660866-29-5)<sup>[18]</sup>

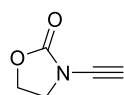

Chemical Formula: C<sub>5</sub>H<sub>5</sub>NO<sub>2</sub>  
Molecular Weight: 111,1000

Following the **General Procedure E**, the title compound was isolated as an orange solid (37 mg, 333  $\mu$ mol). Yield 88%. –  $R_f$  = 0.15 (cyclohexane/EtOAc 7:3). – FTIR-ATR (neat) 3281, 2989, 2920, 2865, 2152, 1755, 1478, 1401, 1272, 1089, 1028, 970, 748, 688, 632  $\text{cm}^{-1}$ . –  $^1\text{H}$  NMR (300 MHz,  $\text{CDCl}_3$ )  $\delta$  = 4.49 – 4.42 (m, 2H), 3.98 – 3.90 (m, 2H), 2.86 (s, 1H) ppm. –  $^{13}\text{C}$  NMR (126 MHz,  $\text{CDCl}_3$ )  $\delta$  = 156.3, 72.7, 63.2 (CH<sub>2</sub>), 60.0 (CH), 46.6 ppm. – MS (ESI-TOF, positive mode)  $m/z$  (rel intensity) 134.02 (100)  $[\text{M}+\text{Na}]^+$ .

## 1-(1-Ethynyl-1H-indol-3-yl)ethan-1-one (CAS: 1574275-58-3)

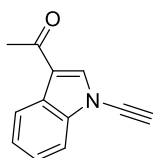

Chemical Formula: C<sub>12</sub>H<sub>9</sub>NO  
Molecular Weight: 183.2100

Following the **General Procedure E**, the title compound was isolated as an off-white solid (110 mg, 600 μmol). Yield 60%. – R<sub>f</sub> = 0.48 (cyclohexane/EtOAc 7:3). – FTIR-ATR (neat) 3308, 3105, 3049, 2924, 2853, 2470, 1735, 1642, 1453, 1218, 930, 738 cm<sup>-1</sup>. – <sup>1</sup>H NMR (500 MHz, CDCl<sub>3</sub>) δ = 8.37 (d, *J* = 7.7 Hz, 1H), 7.85 (s, 1H), 7.57 (d, *J* = 7.9 Hz, 1H), 7.44 – 7.33 (m, 2H), 3.20 (s, 1H), 2.54 (s, 3H) ppm. – <sup>13</sup>C NMR (126 MHz, CDCl<sub>3</sub>) δ = 193.0, 138.6, 135.2, 125.2, 125.0, 124.5, 123.1, 120.0, 111.3, 72.8, 60.5, 27.8 ppm. – HRMS (ESI-TOF, positive mode): *m/z*: calcd for C<sub>12</sub>H<sub>10</sub>NO 184.0757, found 184.0776 [M+H]<sup>+</sup>.

## **γ-Amino-Ynamides**

### *N*-Benzyl-4-methyl-*N*-(3-phenyl-3-(pyrrolidin-1-yl)prop-1-yn-1-yl)benzenesulfonamide (4a)

Following the **General Procedure F**, the title compound **4a** was isolated as a colourless resin (196 mg, 441 μmol). Yield 88%. – R<sub>f</sub> = 0.30 (cyclohexane/EtOAc 7:3). – FTIR-ATR (neat) 3062, 3031, 2965, 2930, 2873, 2816, 2239, 1597, 1494, 1366, 1169, 1090, 1027, 877, 814, 719, 700 cm<sup>-1</sup>. – <sup>1</sup>H NMR (400 MHz, CDCl<sub>3</sub>) δ = 7.72 (d, *J* = 8.4 Hz, 2H), 7.27 – 7.15 (m, 12H), 4.67 (s, 1H), 4.52 (d, *J* = 13.7 Hz, 1H), 4.46 (d, *J* = 13.7 Hz, 1H), 2.39 (s, 3H), 2.38 – 2.22 (m, 4H), 1.62 – 1.54 (m, 4H) ppm. – <sup>13</sup>C NMR (126 MHz, CDCl<sub>3</sub>) δ = 144.7, 139.5, 134.6(1), 134.6(0), 129.8, 129.0, 128.6, 128.4, 128.2, 128.1, 127.9, 127.4, 79.9, 68.0, 58.4, 55.6, 49.6, 23.4, 21.8 ppm. – HRMS (ESI-TOF, positive mode): *m/z*: calcd for C<sub>27</sub>H<sub>29</sub>N<sub>2</sub>O<sub>2</sub>S 445.1944, found 445.1929 [M+H]<sup>+</sup>.

### *N*-Benzyl-*N*-(3-(4-chlorophenyl)-3-(pyrrolidin-1-yl)prop-1-yn-1-yl)-4-methylbenzenesulfonamide (4b)

Following the **General Procedure F**, the title compound **4b** was isolated as a pale-yellow viscous oil (206 mg, 430 μmol). Yield 86%. – R<sub>f</sub> = 0.48 (cyclohexane/EtOAc 7:3). – FTIR-ATR (neat) 2964, 2911, 2874, 2821, 2241, 1597, 1485, 1443, 1368, 1184, 1168, 1086, 1016, 893, 811, 735, 693 cm<sup>-1</sup>. – <sup>1</sup>H NMR (500 MHz, CDCl<sub>3</sub>) δ = 7.77 (d, *J* = 8.4 Hz, 2H), 7.35 – 7.26 (m, 7H), 7.19 (s, 4H), 4.69 (s, 1H), 4.56 (d, *J* = 13.7 Hz, 1H), 4.49 (d, *J* = 13.6 Hz, 1H), 2.45 (s, 3H), 2.40 – 2.23 (m, 4H), 1.68 – 1.56 (m, 4H) ppm. – <sup>13</sup>C NMR (126 MHz, CDCl<sub>3</sub>) δ = 144.8, 138.2, 134.6, 134.5, 133.1, 129.9, 129.5, 129.1, 128.7, 128.5, 128.2, 127.9, 80.2, 67.6, 57.7, 55.5, 49.5, 23.5, 21.8 ppm. – HRMS (ESI-TOF, positive mode): *m/z*: calcd for C<sub>27</sub>H<sub>28</sub>ClN<sub>2</sub>O<sub>2</sub>S 479.1555, found 479.1562 [M+H]<sup>+</sup>.

### *N*-Benzyl-*N*-(3-(4-methoxyphenyl)-3-(pyrrolidin-1-yl)prop-1-yn-1-yl)-4-methylbenzenesulfonamide (4c)

Following the **General Procedure F**, the title compound **4c** was isolated as an orange viscous oil (209 mg, 440 μmol). Yield 88%. – R<sub>f</sub> = 0.19 (cyclohexane/EtOAc 7:3). – FTIR-ATR (neat) 3063, 3032, 2960, 2930, 2873, 2833, 2814, 2237, 1610, 1509, 1456, 1362, 1302, 1244, 1166, 1089, 1029, 874, 837, 812, 717, 695 cm<sup>-1</sup>. – <sup>1</sup>H NMR (500 MHz, CDCl<sub>3</sub>) δ = 7.79 – 7.73 (m, 2H), 7.33 – 7.27 (m, 7H), 7.22 – 7.16 (m, 2H), 6.80 – 6.74 (m, 2H), 4.65 (s, 1H), 4.55 (d, *J* = 13.7 Hz, 1H), 4.49 (d, *J* = 13.7 Hz, 1H), 3.79 (s, 3H), 2.44 (s, 3H), 2.41 – 2.25 (m, 4H), 1.67 – 1.55 (m, 4H) ppm. – <sup>13</sup>C NMR (126 MHz, CDCl<sub>3</sub>) δ = 158.9, 144.7, 134.7(3), 134.7(0), 131.9, 129.8, 129.3, 129.1, 128.7, 128.4, 128.0, 113.5, 79.7, 68.4, 57.8, 55.6, 55.4, 49.6, 23.5,

21.8 ppm. – HRMS (ESI-TOF, positive mode):  $m/z$ : calcd for  $C_{28}H_{31}N_2O_3S$  475.2050, found 475.2072  $[M+H]^+$ .

*N*-Benzyl-*N*-(3-(2-hydroxyphenyl)-3-(pyrrolidin-1-yl)prop-1-yn-1-yl)-4-methylbenzenesulfonamide (**4d**)

Following the **General Procedure F**, the title compound **4d** was isolated as a highly viscous red oil (195 mg, 423  $\mu$ mol). Yield 85%. –  $R_f$  = 0.35 (cyclohexane/EtOAc 7:3). – FTIR-ATR (neat) 3063, 3032, 2962, 2929, 2875, 2849, 2243, 1591, 1457, 1364, 1246, 1166, 1090, 1025, 881, 812, 755, 695  $cm^{-1}$ . –  $^1H$  NMR (500 MHz,  $CD_3CN$ )  $\delta$  = 7.84 – 7.80 (m, 2H), 7.46 – 7.42 (m, 2H), 7.38 – 7.30 (m, 5H), 7.14 (tdd,  $J$  = 8.2, 1.7, 0.7 Hz, 1H), 6.99 – 6.93 (m, 1H), 6.71 – 6.66 (m, 2H), 5.02 (s, 1H), 4.63 (d,  $J$  = 13.9 Hz, 1H), 4.55 (d,  $J$  = 13.8 Hz, 1H), 2.50 – 2.44 (m, 5H), 2.35 – 2.28 (m, 2H), 1.69 – 1.59 (m, 4H) ppm. –  $^{13}C$  NMR (126 MHz,  $CD_3CN$ )  $\delta$  = 158.5, 146.6, 135.7, 135.1, 131.0, 130.1, 130.0, 129.6, 129.4, 128.7, 128.6, 123.3, 119.6, 116.7, 82.3, 66.3, 57.2, 56.2, 49.3, 24.3, 21.6 ppm. – HRMS (ESI-TOF, positive mode):  $m/z$ : calcd for  $C_{27}H_{28}N_2NaO_3S$  483.1713, found 483.1710  $[M+Na]^+$ .

*N*-Benzyl-4-methyl-*N*-(3-(pyridin-3-yl)-3-(pyrrolidin-1-yl)prop-1-yn-1-yl)benzenesulfonamide (**4f**)

Following the **General Procedure F**, the title compound **4f** was isolated as a pale-red solid (186 mg, 417  $\mu$ mol). Yield 83%. –  $R_f$  = 0.20 ( $CH_2Cl_2$ /MeOH 9:1). – FTIR-ATR (neat) 3063, 3051, 3031, 2962, 2928, 2874, 2810, 2239, 1595, 1577, 1495, 1421, 1362, 1292, 1166, 1088, 979, 812, 766, 698  $cm^{-1}$ . –  $^1H$  NMR (500 MHz,  $CDCl_3$ )  $\delta$  = 8.56 (d,  $J$  = 2.3 Hz, 1H), 8.48 (dd,  $J$  = 4.8, 1.7 Hz, 1H), 7.80 – 7.75 (m, 2H), 7.57 (dt,  $J$  = 8.0, 2.1 Hz, 1H), 7.34 – 7.29 (m, 7H), 7.17 (ddd,  $J$  = 7.8, 4.8, 0.9 Hz, 1H), 4.77 (s, 1H), 4.56 (d,  $J$  = 13.7 Hz, 1H), 4.51 (d,  $J$  = 13.6 Hz, 1H), 2.46 (s, 3H), 2.43 – 2.24 (m, 4H), 1.68 – 1.57 (m, 4H) ppm. –  $^{13}C$  NMR (126 MHz,  $CDCl_3$ )  $\delta$  = 149.8, 148.7, 144.9, 135.6, 135.2, 134.6, 134.4, 129.9, 129.0, 128.7, 128.5, 127.8, 123.1, 80.5, 66.9, 56.2, 55.5, 49.5, 23.5, 21.7 ppm. – HRMS (ESI-TOF, positive mode):  $m/z$ : calcd for  $C_{26}H_{28}N_3O_2S$  446.1897, found 446.1897  $[M+H]^+$ .

*N*-Benzyl-4-methyl-*N*-(3-(pyrrolidin-1-yl)-3-(thiophen-2-yl)prop-1-yn-1-yl)benzenesulfonamide (**4g**)

Following the **General Procedure F**, the title compound **4g** was isolated as a pale-red solid (218 mg, 484  $\mu$ mol). Yield 97%. –  $R_f$  = 0.43 (cyclohexane/EtOAc 7:3). – FTIR-ATR (neat) 2961, 2923, 2874, 2856, 2810, 2237, 1596, 1494, 1455, 1360, 1286, 1260, 1230, 1168, 1128, 1087, 1041, 978, 877, 754, 655  $cm^{-1}$ . –  $^1H$  NMR (500 MHz,  $CDCl_3$ )  $\delta$  = 7.77 – 7.71 (m, 2H), 7.29 – 7.24 (m, 7H), 7.15 (dd,  $J$  = 4.9, 1.3 Hz, 1H), 6.84 – 6.76 (m, 2H), 4.94 (d,  $J$  = 1.2 Hz, 1H), 4.52 (d,  $J$  = 13.7 Hz, 1H), 4.46 (d,  $J$  = 13.7 Hz, 1H), 2.41 (s, 3H), 2.40 – 2.31 (m, 4H), 1.64 – 1.53 (m, 4H) ppm. –  $^{13}C$  NMR (126 MHz,  $CDCl_3$ )  $\delta$  = 144.8, 144.6, 134.8, 134.6, 129.9, 129.1, 128.7, 128.4, 128.0, 126.2, 125.4, 125.2, 79.4, 67.5, 55.6, 54.0, 49.3, 23.6, 21.8 ppm. – HRMS (ESI-TOF, positive mode):  $m/z$ : calcd for  $C_{25}H_{27}N_2O_2S_2$  451.1508, found 451.1507  $[M+H]^+$ .

*N*-Benzyl-4-methyl-*N*-(3-ferrocenyl-3-(pyrrolidin-1-yl)prop-1-yn-1-yl)benzenesulfonamide (**4h**)

Following the **General Procedure F**, the title compound **4h** was isolated as an orange solid (116 mg, 210  $\mu$ mol). Yield 84%. –  $R_f$  = 0.14 (cyclohexane/EtOAc 7:3). – FTIR-ATR (neat) 3104, 3062, 3038, 2965, 2925, 2869, 2814, 2251, 1596, 1496, 1455, 1356, 1267, 1162, 1091, 928, 810, 756, 694  $cm^{-1}$ . –  $^1H$  NMR (500 MHz,  $CDCl_3$ )  $\delta$  = 7.90 – 7.83 (m, 2H), 7.40 – 7.28 (m, 7H), 4.59 (s, 2H), 4.56 (s, 1H), 4.17 (dt,  $J$  = 2.6, 1.4 Hz, 1H), 4.07 (dt,  $J$  = 2.6, 1.4 Hz, 1H), 4.05 –

4.01 (m, 2H), 3.99 (s, 5H), 2.46 (s, 3H), 2.37 – 2.23 (m, 4H), 1.60 – 1.53 (m, 4H) ppm. – <sup>13</sup>C NMR (126 MHz, CDCl<sub>3</sub>) δ = 144.8, 135.1, 134.9, 129.9, 128.8(0), 128.7(7), 128.5, 127.9, 86.8, 78.0, 69.1, 68.7, 68.4, 68.2, 68.1, 67.5, 55.7, 54.4, 49.2, 23.3, 21.8 ppm. – HRMS (ESI-TOF, positive mode): *m/z*: calcd for C<sub>31</sub>H<sub>32</sub>FeN<sub>2</sub>O<sub>2</sub>S 552.1529, found 552.1508 [M+H]<sup>+</sup>.

*N*-Benzyl-4-methyl-*N*-(3-(pyrrolidin-1-yl)non-1-yn-1-yl)benzenesulfonamide (**4i**)

Following the **General Procedure F**, the title compound **4i** was isolated as a yellow viscous oil (90 mg, 199 μmol). Yield 80%. – R<sub>f</sub> = 0.10 (cyclohexane/EtOAc 7:3). – FTIR-ATR (neat) 3064, 3032, 2954, 2926, 2857, 2816, 2240, 1597, 1495, 1366, 1292, 1167, 1090, 1025, 812, 697 cm<sup>-1</sup>. – <sup>1</sup>H NMR (500 MHz, CDCl<sub>3</sub>) δ = 7.79 – 7.73 (m, 2H), 7.34 – 7.27 (m, 7H), 4.52 (d, *J* = 13.7 Hz, 1H), 4.43 (d, *J* = 13.6 Hz, 1H), 3.46 (dd, *J* = 9.9, 5.0 Hz, 1H), 2.45 (s, 3H), 2.41 – 2.33 (m, 4H), 1.65 – 1.58 (m, 4H), 1.57 – 1.35 (m, 2H), 1.29 – 1.19 (m, 8H), 0.88 (t, *J* = 7.1 Hz, 4H) ppm. – <sup>13</sup>C NMR (126 MHz, CDCl<sub>3</sub>) δ = 144.6, 134.7, 129.7, 129.0, 128.5, 128.3, 127.9, 78.0, 69.5, 55.6, 54.6, 49.3, 35.3, 31.9, 29.2, 26.7, 23.4, 22.8, 21.8, 14.3 ppm. – HRMS (ESI-TOF, positive mode): *m/z*: calcd for C<sub>27</sub>H<sub>37</sub>N<sub>2</sub>O<sub>2</sub>S 453.2570, found 453.2572 [M+H]<sup>+</sup>.

*N*-Benzyl-4-methyl-*N*-(4-methyl-3-(pyrrolidin-1-yl)pent-1-yn-1-yl)benzenesulfonamide (**4j**)

Following the **General Procedure F**, the title compound **4j** was isolated as a colourless solid (83 mg, 202 μmol). Yield 81%. – R<sub>f</sub> = 0.20 (cyclohexane/EtOAc 7:3). – FTIR-ATR (neat) 3061, 3032, 2962, 2930, 2905, 2870, 2835, 2796, 2241, 1596, 1495, 1358, 1293, 1211, 1166, 1044, 996, 861, 728, 694 cm<sup>-1</sup>. – <sup>1</sup>H NMR (500 MHz, CDCl<sub>3</sub>) δ = 7.79 – 7.74 (m, 2H), 7.30 (m, 7H), 4.52 (d, *J* = 13.6 Hz, 1H), 4.43 (d, *J* = 13.7 Hz, 1H), 3.03 (d, *J* = 8.4 Hz, 1H), 2.45 (s, 3H), 2.39 – 2.26 (m, 4H), 1.68 – 1.55 (m, 5H), 0.86 (d, *J* = 6.7 Hz, 3H), 0.82 (d, *J* = 6.6 Hz, 3H) ppm. – <sup>13</sup>C NMR (126 MHz, CDCl<sub>3</sub>) δ = 144.6, 134.7(6), 134.7(5), 129.7, 129.0, 128.5, 128.3, 127.9, 78.0, 69.0, 61.9, 55.6, 49.8, 32.1, 23.5, 21.8, 20.2, 19.7 ppm. – HRMS (ESI-TOF, positive mode): *m/z*: calcd for C<sub>24</sub>H<sub>31</sub>N<sub>2</sub>O<sub>2</sub>S 411.2101, found 411.2102 [M+H]<sup>+</sup>.

*N*-Benzyl-*N*-(4,4-dimethyl-3-(pyrrolidin-1-yl)pent-1-yn-1-yl)-4-methylbenzenesulfonamide (**4k**)

Following the **General Procedure F**, the title compound **4k** was isolated as a pale-yellow solid (85 mg, 200 μmol). Yield 80%. – R<sub>f</sub> = 0.50 (cyclohexane/EtOAc 7:3). – FTIR-ATR (neat) 3085, 3064, 2958, 2872, 2812, 2239, 1599, 1495, 1455, 1356, 1292, 1168, 1091, 1045, 914, 812, 692 cm<sup>-1</sup>. – <sup>1</sup>H NMR (500 MHz, CDCl<sub>3</sub>) δ = 7.80 – 7.75 (m, 2H), 7.33 – 7.27 (m, 7H), 4.53 (d, *J* = 13.7 Hz, 1H), 4.45 (d, *J* = 13.7 Hz, 1H), 3.23 (s, 1H), 2.45 (s, 3H), 2.43 – 2.37 (m, 4H), 1.58 – 1.48 (m, 4H), 0.83 (s, 9H) ppm. – <sup>13</sup>C NMR (126 MHz, CDCl<sub>3</sub>) δ = 144.5, 134.8(0), 134.7(9), 129.7, 129.0, 128.6, 128.3, 127.9, 79.2, 68.0, 64.8, 55.7, 51.3, 36.0, 27.8, 24.1, 21.8 ppm. – HRMS (ESI-TOF, positive mode): *m/z*: calcd for C<sub>25</sub>H<sub>33</sub>N<sub>2</sub>O<sub>2</sub>S 425.2257, found 425.2256 [M+H]<sup>+</sup>.

*N*-Benzyl-*N*-(3-((*S*)-2,2-dimethyl-1,3-dioxolan-4-yl)-3-(pyrrolidin-1-yl)prop-1-yn-1-yl)-4-methylbenzenesulfonamide (**4l**)

Following the **General Procedure F**, the title compound **4l** was isolated as a colourless oil (84 mg, 179 μmol) in a diastereomeric ratio of 9:1. Yield 70% (both diastereoisomers combined). – R<sub>f</sub> = 0.10 (cyclohexane/EtOAc 8:2). – FTIR-ATR (neat) 3409, 3239, 3066, 3033, 2981, 2962, 2932, 2875, 2814, 2238, 1597, 1544, 1496, 1456, 1366, 1186, 1069, 844, 656 cm<sup>-1</sup>. – <sup>1</sup>H NMR (500 MHz, CDCl<sub>3</sub>) (major diastereomer) δ = 7.76 (d, *J* = 8.3 Hz, 2H), 7.38 – 7.28 (m, 5H), 7.26 – 7.22 (m, 2H), 4.49 (d, *J* = 13.6 Hz, 1H), 4.44 (d, *J* = 13.6 Hz, 1H), 3.96 (ddd, *J*

= 8.6, 7.5, 6.1 Hz, 1H), 3.73 (dd,  $J = 8.5, 6.2$  Hz, 1H), 3.65 (d,  $J = 8.6$  Hz, 1H), 3.50 (dd,  $J = 8.4, 7.5$  Hz, 1H), 2.46 (s, 3H), 2.46 – 2.38 (m, 4H), 1.68 – 1.60 (m, 4H), 1.36 (s, 3H), 1.32 (s, 3H) ppm. –  $^{13}\text{C}$  NMR (126 MHz,  $\text{CDCl}_3$ )  $\delta = 144.9, 134.6, 134.4, 129.9, 129.0, 128.7, 128.6, 127.8, 110.2, 79.5, 76.6, 67.9, 65.7, 58.3, 55.4, 49.4, 25.8, 23.5, 21.8, 1.2$  ppm. – HRMS (ESI-TOF, positive mode):  $m/z$ : calcd for  $\text{C}_{26}\text{H}_{33}\text{N}_2\text{O}_4\text{S}$  469.2156, found 469.2131  $[\text{M}+\text{H}]^+$ .

*N*-Benzyl-4-methyl-*N*-((1-(pyrrolidin-1-yl)cyclohexyl)ethynyl)benzenesulfonamide  
**(4m)**

Following the **General Procedure F**, the title compound **4m** was isolated as an off-white solid (87 mg, 199  $\mu\text{mol}$ ). Yield 80%. –  $R_f = 0.26$  ( $\text{CH}_2\text{Cl}_2/\text{MeOH}$  9:1). – FTIR-ATR (neat) 3029, 2955, 2929, 2854, 2825, 2233, 1597, 1495, 1447, 1361, 1258, 1122, 1045, 971, 809, 735, 694  $\text{cm}^{-1}$ . –  $^1\text{H}$  NMR (500 MHz,  $\text{CDCl}_3$ )  $\delta = 7.80 - 7.75$  (m, 2H), 7.35 – 7.26 (m, 7H), 4.48 (s, 2H), 2.46 (s, 3H), 2.45 – 2.38 (m, 4H), 1.78 – 1.71 (m, 2H), 1.64 – 1.55 (m, 4H), 1.55 – 1.43 (m, 2H), 1.38 – 1.18 (m, 5H), 1.13 – 1.01 (m, 1H) ppm. –  $^{13}\text{C}$  NMR (126 MHz,  $\text{CDCl}_3$ )  $\delta = 144.6, 134.7(0), 134.6(5), 129.7, 129.1, 128.5, 128.3, 127.9, 78.8, 71.3, 59.3, 55.6, 46.9, 38.0, 25.6, 23.3, 22.9, 21.8$  ppm. – HRMS (ESI-TOF, positive mode):  $m/z$ : calcd for  $\text{C}_{26}\text{H}_{33}\text{N}_2\text{O}_2\text{S}$  437.2257, found 437.2250  $[\text{M}+\text{H}]^+$ .

*N*-Benzyl-4-methyl-*N*-((1-(pyrrolidin-1-yl)cyclopentyl)ethynyl)benzenesulfonamide  
**(4n)**

Following the **General Procedure F**, the title compound **4n** was isolated as a yellow solid (150 mg, 355  $\mu\text{mol}$ ). Yield 71%. –  $R_f = 0.37$  ( $\text{CH}_2\text{Cl}_2/\text{MeOH}$  9:1). – FTIR-ATR (neat) 3268, 3060, 3031, 2961, 2929, 2869, 2808, 2232, 1597, 1495, 1454, 1423, 1365, 1323, 1309, 1292, 1188, 1165, 1090, 1059, 1012, 940, 912, 875, 816, 801, 781, 741, 700, 662  $\text{cm}^{-1}$ . –  $^1\text{H}$  NMR (500 MHz,  $\text{CDCl}_3$ )  $\delta = 7.76$  (d,  $J = 8.3$  Hz, 2H), 7.33 – 7.26 (m, 7H), 4.47 (s, 2H), 2.46 (s, 3H), 2.42 – 2.37 (m, 4H), 1.77 – 1.71 (m, 2H), 1.70 – 1.47 (m, 9H) ppm. –  $^{13}\text{C}$  NMR (126 MHz,  $\text{CDCl}_3$ )  $\delta = 144.7, 134.8, 129.8, 129.3, 128.6, 128.4, 128.0, 127.5, 78.1, 72.4, 65.6, 55.7, 49.2, 40.7, 23.7, 23.4, 21.9$  ppm. – HRMS (ESI-TOF, positive mode):  $m/z$ : calcd for  $\text{C}_{25}\text{H}_{31}\text{N}_2\text{O}_2\text{S}$  423.2101, found 423.2112  $[\text{M}+\text{H}]^+$ .

*N*-Benzyl-4-methyl-*N*-((1-(pyrrolidin-1-yl)cycloheptyl)ethynyl)benzenesulfonamide  
**(4o)**

Following the **General Procedure F**, the title compound **4o** was isolated as a yellow solid (189 mg, 419  $\mu\text{mol}$ ). Yield 84%. –  $R_f = 0.54$  ( $\text{CH}_2\text{Cl}_2/\text{MeOH}$  9:1). – FTIR-ATR (neat) 3104, 3062, 3038, 2965, 2925, 2869, 2814, 2251, 1596, 1496, 1455, 1356, 1267, 1162, 1129, 1091, 1025, 928, 905, 881, 756, 694  $\text{cm}^{-1}$ . –  $^1\text{H}$  NMR (500 MHz,  $\text{CDCl}_3$ )  $\delta = 7.77$  (d,  $J = 8.4$  Hz, 2H), 7.31 (d,  $J = 8.1$  Hz, 2H), 7.30 – 7.26 (m, 4H), 4.47 (s, 2H), 2.45 (s, 3H), 2.44 – 2.38 (m, 4H), 1.78 – 1.69 (m, 2H), 1.65 – 1.44 (m, 12H), 1.42 – 1.31 (m, 2H) ppm. –  $^{13}\text{C}$  NMR (126 MHz,  $\text{CDCl}_3$ )  $\delta = 144.5, 134.7(9), 134.7(6), 129.7, 129.1, 128.5, 128.3, 128.0, 77.6, 73.1, 62.5, 55.7, 47.6, 40.3, 28.1, 23.6, 22.0, 21.8$  ppm. – HRMS (ESI-TOF, positive mode):  $m/z$ : calcd for  $\text{C}_{27}\text{H}_{35}\text{N}_2\text{O}_2\text{S}$  451.2414, found 451.2431  $[\text{M}+\text{H}]^+$ .

*N*-Benzyl-4-methyl-*N*-((2-methyl-1-(pyrrolidin-1-yl)cyclohexyl)ethynyl)benzenesulfonamide  
**(4p)**

Following the **General Procedure F**, the title compound **4p** was isolated as a colourless viscous oil (30 mg, 68  $\mu\text{mol}$ ) as a mixture of both diastereoisomers in a 1:1 ratio. Yield 27%. –  $R_f = 0.10$  (cyclohexane/EtOAc 7:3). – FTIR-ATR (neat) 3065, 3032, 2928, 2859, 2816, 2234, 1598, 1496, 2455, 1364, 1090, 812, 657  $\text{cm}^{-1}$ . –  $^1\text{H}$  NMR (500 MHz,  $\text{CDCl}_3$ ) (both diastereoisomers, proportion 1:1)  $\delta = 7.78 - 7.70$  (m, 4H), 7.32 – 7.22 (m, 14H), 4.49 – 4.39

(m, 4H), 2.46 – 2.37 (m, 10H), 2.36 – 2.27 (m, 4H), 1.80 – 1.33 (m, 19H), 1.30 – 1.12 (m, 7H), 1.11 – 1.02 (m, 1H), 0.86 (d,  $J = 11.7$  Hz, 3H), 0.84 (d,  $J = 11.6$  Hz, 3H) ppm. –  $^{13}\text{C}$  NMR (126 MHz,  $\text{CDCl}_3$ )  $\delta = 144.5, 144.4, 134.8(2), 134.8(0), 134.7, 129.7(1), 129.7(0), 129.0, 128.5(2), 128.5(0), 128.3, 128.2, 127.9(3), 127.9(1), 78.5, 77.9, 72.6, 72.4, 62.0, 61.3, 55.7, 55.6(6), 46.4, 46.0, 36.5, 31.5, 29.6, 23.9, 23.3, 23.1, 21.8(3), 21.8(0), 21.7(6), 19.5, 16.6, 13.0$  ppm. – HRMS (ESI-TOF, positive mode):  $m/z$ : calcd for  $\text{C}_{27}\text{H}_{35}\text{N}_2\text{O}_2\text{S}$  451.2414, found 451.2407  $[\text{M}+\text{H}]^+$ .

*N*-Benzyl-4-methyl-*N*-(3-methyl-3-(pyrrolidin-1-yl)hept-1-yn-1-yl)benzenesulfonamide

**(4r)**

Following the **General Procedure F**, the title compound **4s** was isolated as a colourless solid (68 mg, 203  $\mu\text{mol}$ ). Yield 79%. –  $R_f = 0.12$  (cyclohexane/EtOAc 7:3). – FTIR-ATR (neat) 3065, 3032, 2955, 2935, 2870, 2816, 2235, 1597, 1495, 1455, 1364, 1306, 1166, 1089, 960, 898, 776, 697  $\text{cm}^{-1}$ . –  $^1\text{H}$  NMR (500 MHz,  $\text{CDCl}_3$ )  $\delta = 7.76 – 7.70$  (m, 2H), 7.31 – 7.21 (m, 6H), 4.46 (d,  $J = 13.6$  Hz, 1H), 4.42 (d,  $J = 13.5$  Hz, 1H), 2.43 (s, 3H), 2.41 – 2.37 (m, 4H), 1.61 – 1.54 (m, 4H), 1.50 – 1.35 (m, 2H), 1.25 – 1.10 (m, 7H), 0.85 – 0.80 (m, 3H) ppm. –  $^{13}\text{C}$  NMR (126 MHz,  $\text{CDCl}_3$ )  $\delta = 144.5, 134.7, 134.6, 129.7, 129.1, 128.5, 128.3, 128.0, 72.4, 58.0, 55.6, 47.6, 41.4, 31.1, 26.6, 26.0, 23.5, 23.2, 21.8, 14.2$  ppm. – HRMS (ESI-TOF, positive mode):  $m/z$ : calcd for  $\text{C}_{26}\text{H}_{35}\text{N}_2\text{O}_2\text{S}$  439.2414, found 439.2436  $[\text{M}+\text{H}]^+$ .

*N*-Benzyl-4-methyl-*N*-(3-phenyl-3-(piperidin-1-yl)prop-1-yn-1-yl)benzenesulfonamide

**(5a)**

Following the **General Procedure F**, the title compound **5a** was isolated as a yellow solid (214 mg, 467  $\mu\text{mol}$ ). Yield 93%. –  $R_f = 0.43$  (cyclohexane/EtOAc 8:2). – FTIR-ATR (neat) 3056, 3029, 2938, 2917, 2856, 2800, 2753, 2238, 1596, 1491, 1452, 1357, 1300, 1167, 1087, 986, 811, 768, 698  $\text{cm}^{-1}$ . –  $^1\text{H}$  NMR (300 MHz,  $\text{CDCl}_3$ )  $\delta = 7.83 – 7.75$  (m, 2H), 7.35 – 7.27 (m, 8H), 7.25 – 7.19 (m, 2H), 4.59 (d,  $J = 13.7$  Hz, 1H), 4.55 (s, 1H), 4.51 (d,  $J = 13.7$  Hz, 1H), 2.45 (s, 3H), 2.22 – 2.12 (m, 4H), 1.51 – 1.38 (m, 3H), 1.35 – 1.24 (m, 2H) ppm. –  $^{13}\text{C}$  NMR (126 MHz,  $\text{CDCl}_3$ )  $\delta = 144.7, 138.8, 134.7, 134.7, 129.8, 129.1, 128.7, 128.5, 128.4, 128.0, 128.0, 127.3, 80.6, 67.5, 61.9, 55.7, 31.1, 26.2, 24.4, 21.8$  ppm. – HRMS (ESI-TOF, positive mode):  $m/z$ : calcd for  $\text{C}_{28}\text{H}_{31}\text{N}_2\text{O}_2\text{S}$  459.2101, found 459.2095  $[\text{M}+\text{H}]^+$ .

*N*-Benzyl-4-methyl-*N*-(3-morpholino-3-phenylprop-1-yn-1-yl)benzenesulfonamide (5b)

Following the **General Procedure F**, the title compound **5b** was isolated as a colourless solid (98 mg, 213  $\mu\text{mol}$ ). Yield 85%. –  $R_f = 0.20$  (Cy/EtOAc 7:3). – FTIR-ATR (neat) 3268, 3064, 3048, 3029, 2965, 2925, 2860, 2834, 2247, 1596, 1493, 1449, 1371, 1321, 1249, 1167, 1111, 1002, 892, 804, 740, 695  $\text{cm}^{-1}$ . –  $^1\text{H}$  NMR (300 MHz,  $\text{CDCl}_3$ )  $\delta = 7.83 – 7.73$  (m, 2H), 7.34 – 7.26 (m, 9H), 7.26 – 7.22 (m, 3H), 4.59 (d,  $J = 13.7$  Hz, 1H), 4.54 – 4.47 (m, 2H), 3.64 – 3.50 (m, 4H), 2.45 (s, 3H), 2.28 – 2.20 (m, 4H) ppm. –  $^{13}\text{C}$  NMR (126 MHz,  $\text{CDCl}_3$ )  $\delta = 144.9, 137.9, 134.6, 134.5, 129.9, 129.1, 128.7, 128.6, 128.5, 128.2, 128.0, 127.7, 81.1, 67.1, 66.9, 61.6, 55.6, 49.4, 21.8$  ppm. – HRMS (ESI-TOF, positive mode):  $m/z$ : calcd for  $\text{C}_{27}\text{H}_{28}\text{N}_2\text{NaO}_3\text{S}$  483.1713, found 483.1705  $[\text{M}+\text{Na}]^+$ .

*N*-Benzyl-*N*-(3-(3,4-dihydroisoquinolin-2(1*H*)-yl)-3-phenylprop-1-yn-1-yl)-4-methylbenzenesulfonamide (5c)

Following the **General Procedure F**, the title compound **5c** was isolated as a yellow resin (107 mg, 211  $\mu\text{mol}$ ). Yield 84%. –  $R_f = 0.57$  (cyclohexane/EtOAc 7:3). – FTIR-ATR (neat) 3062, 3028, 2923, 2892, 2830, 2785, 2244, 1736, 1637, 1597, 1494, 1453, 1255, 1088, 1039, 985, 886, 816, 722, 656  $\text{cm}^{-1}$ . –  $^1\text{H}$  NMR (500 MHz,  $\text{CDCl}_3$ )  $\delta = 7.79$  (d,  $J = 8.0$  Hz, 2H), 7.41



– 7.36 (m, 2H), 7.34 – 7.21 (m, 10H), 7.14 – 7.05 (m, 3H), 6.94 – 6.89 (m, 1H), 4.82 (s, 1H), 4.60 (d,  $J = 13.5$  Hz, 1H), 4.52 (d,  $J = 13.4$  Hz, 1H), 3.48 (d,  $J = 14.9$  Hz, 1H), 3.41 (d,  $J = 14.8$  Hz, 1H), 2.76 (qt,  $J = 16.0, 5.8$  Hz, 2H), 2.50 – 2.40 (m, 3H), 2.39 (s, 3H) ppm. –  $^{13}\text{C}$  NMR (126 MHz,  $\text{CDCl}_3$ )  $\delta = 144.8, 138.3, 135.3, 134.5, 134.4(1), 134.4(0), 129.8, 129.1, 128.6(8), 128.6(7), 128.5, 128.4, 128.1, 127.9, 127.6, 126.8, 125.9, 125.5, 81.1, 66.8, 61.2, 55.6, 51.8, 46.7, 29.6, 21.7$  ppm. – HRMS (ESI-TOF, positive mode):  $m/z$ : calcd for  $\text{C}_{32}\text{H}_{31}\text{N}_2\text{O}_2\text{S}$  507.2101, found 507.2076  $[\text{M}+\text{H}]^+$ .

*N*-Benzyl-*N*-((*R*)-3-((*R*)-2-(hydroxymethyl)pyrrolidin-1-yl)-3-phenylprop-1-yn-1-yl)-4-methylbenzenesulfonamide (**5d**)

Following the **General Procedure F**, the title compound **5d** was isolated as a pale-yellow solid (105 mg, 221  $\mu\text{mol}$ ) in a diastereomeric ratio of 92:8. Yield 88%. –  $R_f = 0.13$  (cyclohexane/EtOAc 7:3). – FTIR-ATR (neat) 3476, 3059, 3031, 2961, 2923, 2874, 2820, 2243, 1595, 1493, 1448, 1402, 1354, 1249, 1166, 1085, 1001, 882, 814, 768, 695  $\text{cm}^{-1}$ . –  $^1\text{H}$  NMR (500 MHz,  $\text{CDCl}_3$ ) (major diastereomer)  $\delta = 7.84 – 7.78$  (m, 2H), 7.37 – 7.30 (m, 8H), 7.27 – 7.23 (m, 5H), 4.86 (s, 1H), 4.61 (d,  $J = 13.5$  Hz, 1H), 4.52 (d,  $J = 13.6$  Hz, 1H), 3.65 (dd,  $J = 10.9, 3.4$  Hz, 1H), 3.39 (dd,  $J = 11.0, 2.3$  Hz, 1H), 2.77 – 2.70 (m, 1H), 2.61 – 2.51 (m, 1H), 2.47 (s, 3H), 2.36 – 2.28 (m, 2H), 1.75 – 1.62 (m, 2H), 1.55 – 1.46 (m, 2H) ppm. –  $^{13}\text{C}$  NMR (126 MHz,  $\text{CDCl}_3$ )  $\delta = 144.9, 139.1, 134.6, 134.5, 129.9, 129.1, 128.7, 128.5, 128.3, 128.1, 127.9, 127.5, 80.3, 67.2, 61.7, 61.5, 55.8, 55.5, 47.5, 27.8, 23.4, 21.8$  ppm. – HRMS (ESI-TOF, positive mode):  $m/z$ : calcd for  $\text{C}_{28}\text{H}_{31}\text{N}_2\text{O}_3\text{S}$  475.2050, found 475.2067  $[\text{M}+\text{H}]^+$ .

*N*-(3-(Allyl(4-methoxybenzyl)amino)-3-phenylprop-1-yn-1-yl)-*N*-benzyl-4-methylbenzenesulfonamide (**5f**)

Following the **General Procedure F**, the title compound **5f** was isolated as a colourless resin (100 mg, 182  $\mu\text{mol}$ ). Yield 67%. –  $R_f = 0.57$  (cyclohexane/EtOAc 7:3). – FTIR-ATR (neat) 3062, 3031, 3001, 2929, 2833, 2240, 1611, 1511, 1450, 1365, 1301, 1247, 1167, 1090, 1034, 919, 870, 831, 740, 697  $\text{cm}^{-1}$ . –  $^1\text{H}$  NMR (500 MHz,  $\text{CDCl}_3$ )  $\delta = 7.77$  (d,  $J = 8.0$  Hz, 2H), 7.33 – 7.23 (m, 9H), 7.19 – 7.09 (m, 3H), 7.04 (d,  $J = 8.4$  Hz, 2H), 6.77 – 6.68 (m, 2H), 5.63 (dddd,  $J = 16.9, 9.9, 8.5, 3.9$  Hz, 1H), 5.03 (dt,  $J = 17.1, 2.2$  Hz, 1H), 4.97 (dt,  $J = 10.1, 2.0$  Hz, 1H), 4.63 (s, 1H), 4.55 (d,  $J = 13.6$  Hz, 1H), 4.51 (d,  $J = 13.7$  Hz, 1H), 3.69 (s, 3H), 3.41 (d,  $J = 13.3$  Hz, 1H), 2.88 – 2.80 (m, 2H), 2.48 (dd,  $J = 14.1, 8.6$  Hz, 1H), 2.37 (s, 3H) ppm. –  $^{13}\text{C}$  NMR (126 MHz,  $\text{CDCl}_3$ )  $\delta = 158.7, 144.8, 139.4, 136.8, 134.6, 131.6, 130.0, 129.9, 129.1, 128.8, 128.5, 128.2, 128.0(1), 128.0(0), 127.3, 117.2, 113.6, 80.7, 66.8, 55.8, 55.6, 55.4, 53.8, 53.1, 21.8$  ppm. – HRMS (ESI-TOF, positive mode):  $m/z$ : calcd for  $\text{C}_{34}\text{H}_{34}\text{N}_2\text{NaO}_3\text{S}$  573.2182, found 573.2183  $[\text{M}+\text{Na}]^+$ .

*N*-Benzyl-*N*-(3-(diethylamino)-3-phenylprop-1-yn-1-yl)-4-methylbenzenesulfonamide (**5g**)

Following the **General Procedure F**, the title compound **5g** was isolated as a colourless oil (59 mg, 133  $\mu\text{mol}$ ). Yield 53% (69% based on recovered starting material). –  $R_f = 0.31$  (cyclohexane/EtOAc 8:2). – FTIR-ATR (neat) 3087, 3062, 3030, 2968, 2931, 2872, 2820, 2237, 1597, 1493, 1449, 1364, 1166, 1089, 1026, 868, 812, 717, 695  $\text{cm}^{-1}$ . –  $^1\text{H}$  NMR (500 MHz,  $\text{CDCl}_3$ )  $\delta = 7.77 – 7.71$  (m, 2H), 7.30 – 7.23 (m, 7H), 7.22 – 7.14 (m, 5H), 4.73 (s, 1H), 4.51 (d,  $J = 13.6$  Hz, 1H), 4.46 (d,  $J = 13.6$  Hz, 1H), 2.40 (s, 3H), 2.29 (dq,  $J = 12.7, 7.4$  Hz, 2H), 2.03 (dq,  $J = 13.6, 6.9$  Hz, 2H), 0.85 (t,  $J = 7.1$  Hz, 6H) ppm. –  $^{13}\text{C}$  NMR (126 MHz,  $\text{CDCl}_3$ )  $\delta = 144.7, 140.0, 134.7, 134.6, 129.8, 129.1, 128.7, 128.4(3), 128.4(0), 128.0, 127.9(6), 127.1, 80.0, 67.5, 56.6, 55.6, 44.4, 21.8, 13.6$  ppm. – HRMS (ESI-TOF, positive mode):  $m/z$ : calcd for  $\text{C}_{27}\text{H}_{31}\text{N}_2\text{O}_2\text{S}$  447.2101, found 447.2133  $[\text{M}+\text{H}]^+$ .

*N*-Benzyl-*N*-(3-(benzylamino)-3-phenylprop-1-yn-1-yl)-4-methylbenzenesulfonamide

**(5k)**

Ti(OEt)<sub>4</sub> (20.0 μL, 64 μmol, 1.0 eq.) was added to a suspension of *N*-benzylbenzaldimine (25.0 mg, 128 μmol, 2.0 eq.), **3** (18.5 mg, 64 μmol, 1.0 eq.) and Cu<sup>I</sup>-USY (2.9 mg, 8 mol%) in EtOAc (1 mL) at room temperature. The vial was flushed with argon and capped. The mixture was stirred at 30 °C for six days. Then, the mixture was dissolved in EtOAc, filtered over celite and concentrated. The crude was purified by column chromatography on silica gel (cyclohexane/EtOAc/Et<sub>3</sub>N 99:0:1 to 89:10:1). The title compound **5k** was isolated as a yellow oil (5.3 mg, 11 μmol). Yield 17%. – R<sub>f</sub> = 0.45 (cyclohexane/EtOAc 7:3). – FTIR-ATR (neat) 3320, 3086, 3061, 3029, 2922, 2852, 2241, 1597, 1494, 1360, 1166, 1089, 813, 695 cm<sup>-1</sup>. – <sup>1</sup>H NMR (500 MHz, CDCl<sub>3</sub>) δ = 7.77 – 7.73 (m, 2H), 7.35 – 7.21 (m, 17H), 4.56 (d, *J* = 13.7 Hz, 1H), 4.55 (s, 1H), 4.51 (d, *J* = 13.7 Hz, 1H), 3.72 (d, *J* = 13.0 Hz, 1H), 3.65 (d, *J* = 13.0 Hz, 1H), 2.42 (s, 3H) ppm. – <sup>13</sup>C NMR (126 MHz, CDCl<sub>3</sub>) δ = 144.8, 140.3, 139.9, 134.6(1), 134.6(0), 129.9, 129.1, 128.7, 128.5(3), 128.5(1), 128.4, 128.4, 127.9, 127.7, 127.6, 127.1, 78.9, 71.1, 55.6, 53.1, 50.9, 21.8 ppm. – HRMS (ESI-TOF, positive mode): *m/z*: calcd for C<sub>30</sub>H<sub>28</sub>N<sub>2</sub>NaO<sub>2</sub>S 503.1764, found 503.1727 [M+Na]<sup>+</sup>.

*N*-Benzyl-4-nitro-*N*-(3-phenyl-3-(pyrrolidin-1-yl)prop-1-yn-1-yl)benzenesulfonamide

**(6a)**

Following the **General Procedure F**, the title compound **6a** was isolated as an orange solid (83 mg, 175 μmol). Yield 70%. – R<sub>f</sub> = 0.36 (cyclohexane/EtOAc 7:3). – FTIR-ATR (neat) 3104, 3063, 3026, 2959, 2925, 2870, 2848, 2241, 1604, 1529, 1450, 1368, 1307, 1171, 1088, 1006, 898, 854, 740, 700 cm<sup>-1</sup>. – <sup>1</sup>H NMR (500 MHz, CDCl<sub>3</sub>) δ = 8.26 – 8.22 (m, 2H), 7.96 – 7.90 (m, 2H), 7.35 – 7.27 (m, 10H), 4.67 (s, 1H), 4.62 (d, *J* = 13.9 Hz, 1H), 4.58 (d, *J* = 13.9 Hz, 1H), 2.46 – 2.30 (m, 4H), 1.73 – 1.57 (m, 4H) ppm. – <sup>13</sup>C NMR (126 MHz, CDCl<sub>3</sub>) δ = 150.5, 143.0, 139.3, 133.9, 129.1, 128.9, 128.8, 128.4, 128.1, 127.8, 124.3, 78.8, 69.4, 58.7, 56.2, 50.1, 23.5 ppm. – HRMS (ESI-TOF, positive mode): *m/z*: calcd for C<sub>26</sub>H<sub>26</sub>N<sub>3</sub>O<sub>4</sub>S 476.1639, found 476.1630 [M+H]<sup>+</sup>.

*N*-Benzyl-*N*-(3-phenyl-3-(pyrrolidin-1-yl)prop-1-yn-1-yl)methanesulfonamide (**6b**)

Following the **General Procedure F**, the title compound **6b** was isolated as a pale-yellow oil (66 mg, 179 μmol). Yield 71%. – R<sub>f</sub> = 0.53 (cyclohexane/EtOAc 1:1). – FTIR-ATR (neat) 3086, 3060, 3030, 3012, 2959, 2931, 2873, 2814, 2240, 1624, 1602, 1587, 1493, 1450, 1346, 1154, 959, 906, 780, 698 cm<sup>-1</sup>. – <sup>1</sup>H NMR (500 MHz, CDCl<sub>3</sub>) δ = 7.46 – 7.42 (m, 2H), 7.41 – 7.35 (m, 5H), 7.33 – 7.22 (m, 3H), 4.79 (s, 1H), 4.66 (d, *J* = 14.2 Hz, 1H), 4.62 (d, *J* = 14.2 Hz, 1H), 2.94 (s, 3H), 2.54 – 2.40 (m, 4H), 1.76 – 1.64 (m, 4H) ppm. – <sup>13</sup>C NMR (126 MHz, CDCl<sub>3</sub>) δ = 139.5, 134.6, 129.2, 128.9, 128.8, 128.3, 128.2, 127.6, 79.5, 68.8, 58.6, 55.7, 50.0, 38.7, 23.5 ppm. – HRMS (ESI-TOF, positive mode): *m/z*: calcd for C<sub>21</sub>H<sub>25</sub>N<sub>2</sub>O<sub>2</sub>S 369.1631, found 369.1648 [M+H]<sup>+</sup>.

*N*-Benzyl-4-nitro-*N*-((1-(pyrrolidin-1-yl)cyclohexyl)ethynyl)benzenesulfonamide (**6c**)

Following the **General Procedure F**, the title compound **6c** was isolated as a pale-yellow solid (96 mg, 205 μmol). Yield 82%. – R<sub>f</sub> = 0.60 (CH<sub>2</sub>Cl<sub>2</sub>/MeOH 9:1). – FTIR-ATR (neat) 3100, 3072, 3032, 2928, 2855, 2822, 2230, 1604, 1527, 1454, 1376, 1346, 1251, 1172, 1123, 1086, 1018, 903, 785, 740, 684 cm<sup>-1</sup>. – <sup>1</sup>H NMR (500 MHz, CDCl<sub>3</sub>) δ = 8.36 – 8.29 (m, 2H), 8.03 – 7.96 (m, 2H), 7.34 – 7.27 (m, 5H), 4.57 (s, 2H), 2.53 – 2.40 (m, 4H), 1.80 – 1.74 (m, 2H), 1.67 – 1.59 (m, 4H), 1.58 – 1.46 (m, 3H), 1.37 (td, *J* = 12.3, 3.3 Hz, 2H), 1.31 – 1.21 (m, 3H), 1.17 – 1.07 (m, 1H) ppm. – <sup>13</sup>C NMR (126 MHz, CDCl<sub>3</sub>) δ = 150.5, 143.2, 134.0, 129.0(5), 129.0(3), 128.8,

128.7, 124.2, 77.9, 72.4, 59.3, 56.3, 47.0, 37.9, 25.6, 23.4, 22.9 ppm. – HRMS (ESI-TOF, positive mode):  $m/z$ : calcd for  $C_{25}H_{29}N_3NaO_4S$  490.1771, found 490.1753  $[M+Na]^+$ .

#### *N*-Benzyl-*N*-((1-(pyrrolidin-1-yl)cyclohexyl)ethynyl)methanesulfonamide (6d)

Following the **General Procedure F**, the title compound **6d** was isolated as a colourless solid (49 mg, 136  $\mu$ mol). Yield 54%. –  $R_f$  = 0.42 ( $CH_2Cl_2/MeOH$  9:1). – FTIR-ATR (neat) 3069, 3025, 2950, 2930, 2858, 2812, 2232, 1495, 1354, 1161, 956, 787, 695  $cm^{-1}$ . –  $^1H$  NMR (500 MHz,  $CDCl_3$ )  $\delta$  = 7.44 – 7.31 (m, 5H), 4.58 (s, 2H), 2.92 (s, 3H), 2.61 – 2.48 (m, 4H), 1.89 – 1.80 (m, 2H), 1.71 – 1.64 (m, 4H), 1.64 – 1.49 (m, 3H), 1.45 – 1.34 (m, 4H), 1.18 – 1.08 (m, 1H) ppm. –  $^{13}C$  NMR (126 MHz,  $CDCl_3$ )  $\delta$  = 134.6, 129.2, 128.7(4), 128.7(0), 78.5, 72.0, 59.3, 55.7, 47.0, 38.2, 38.0, 25.6, 23.4, 23.1 ppm. – HRMS (ESI-TOF, positive mode):  $m/z$ : calcd for  $C_{20}H_{29}N_2O_2S$  361.1944, found 361.1929  $[M+H]^+$ .

#### 1-(3-Phenyl-3-(pyrrolidin-1-yl)prop-1-yn-1-yl)pyrrolidin-2-one (6e)

Following the **General Procedure F**, the title compound **6e** was isolated as a pale-orange solid (18 mg, 68  $\mu$ mol). Yield 27%. –  $R_f$  = 0.42 ( $CH_2Cl_2/MeOH$  9:1). – FTIR-ATR (neat) 3084, 3060, 3028, 2962, 2932, 2875, 2807, 2704, 2246, 1716, 1627, 1602, 1392, 1262, 1194, 1028, 700  $cm^{-1}$ . –  $^1H$  NMR (500 MHz,  $CDCl_3$ )  $\delta$  = 7.51 – 7.43 (m, 2H), 7.26 (t,  $J$  = 7.5 Hz, 2H), 7.22 – 7.17 (m, 1H), 4.77 (s, 1H), 3.68 – 3.62 (m, 2H), 2.59 – 2.48 (m, 4H), 2.38 (t,  $J$  = 8.1 Hz, 2H), 2.07 (quint,  $J$  = 7.6 Hz, 2H), 1.75 – 1.63 (m, 4H) ppm. –  $^{13}C$  NMR (126 MHz,  $CDCl_3$ )  $\delta$  = 176.2, 139.6, 128.3, 128.3, 127.6, 77.9, 69.4, 58.8, 50.3, 50.2, 29.8, 23.5, 18.9 ppm. – HRMS (ESI-TOF, positive mode):  $m/z$ : calcd for  $C_{17}H_{21}N_2O$  269.1648, found 269.1639  $[M+H]^+$ .

#### 3-(3-Phenyl-3-(pyrrolidin-1-yl)prop-1-yn-1-yl)oxazolidin-2-one (6f)

Following the **General Procedure F**, the title compound **6f** was isolated as a pale-red solid (77 mg, 285  $\mu$ mol). Yield 90%. –  $R_f$  = 0.52 ( $CH_2Cl_2/MeOH$  9:1). – FTIR-ATR (neat) 3058, 3032, 2964, 2915, 2873, 2805, 2246, 1752, 1475, 1418, 1218, 1199, 1110, 1028, 865, 748, 702  $cm^{-1}$ . –  $^1H$  NMR (500 MHz,  $CDCl_3$ )  $\delta$  = 7.56 – 7.49 (m, 2H), 7.37 – 7.31 (m, 2H), 7.30 – 7.26 (m, 1H), 4.80 (s, 1H), 4.49 – 4.40 (m, 2H), 3.98 – 3.89 (m, 2H), 2.60 (m, 4H), 1.77 (m, 4H) ppm. –  $^{13}C$  NMR (126 MHz,  $CDCl_3$ )  $\delta$  = 156.4, 139.4, 128.4, 128.3, 127.7, 76.5, 68.3, 63.0, 58.8, 50.4, 47.1, 23.5 ppm. – HRMS (ESI-TOF, positive mode):  $m/z$ : calcd for  $C_{16}H_{18}N_2NaO_2$  293.1260, found 293.1251  $[M+H]^+$ .

#### 4-Methyl-*N*-phenyl-*N*-(3-phenyl-3-(pyrrolidin-1-yl)prop-1-yn-1-yl)benzenesulfonamide (6h)

Following the **General Procedure F**, the title compound **6h** was isolated as a yellow solid (181 mg, 420  $\mu$ mol). Yield 84%. –  $R_f$  = 0.39 (cyclohexane/EtOAc 7:3). – FTIR-ATR (neat) 3059, 3028, 2958, 2924, 2874, 2853, 2814, 2244, 1685, 1595, 1542, 1489, 1446, 1370, 1257, 1156, 1088, 1028, 922, 888, 812, 755, 691  $cm^{-1}$ . –  $^1H$  NMR (500 MHz,  $CDCl_3$ )  $\delta$  = 7.56 – 7.52 (m, 2H), 7.53 – 7.47 (m, 2H), 7.36 – 7.27 (m, 8H), 7.22 (d,  $J$  = 8.1 Hz, 2H), 4.84 (s, 1H), 2.65 – 2.52 (m, 4H), 2.42 (s, 3H), 1.80 – 1.71 (m, 4H) ppm. –  $^{13}C$  NMR (126 MHz,  $CDCl_3$ )  $\delta$  = 145.0, 139.7, 139.2, 133.1, 129.5, 129.2, 128.4, 128.3(1), 128.3(0), 128.2, 127.6, 126.2, 80.4, 67.6, 58.7, 50.1, 23.6, 21.8 ppm. – HRMS (ESI-TOF, positive mode):  $m/z$ : calcd for  $C_{26}H_{26}N_2NaO_2S$  453.1607, found 453.1592  $[M+Na]^+$ .

#### 4-Methyl-*N*-phenyl-*N*-((1-(pyrrolidin-1-yl)cyclohexyl)ethynyl)benzenesulfonamide (6i)

Following the **General Procedure F**, the title compound **6i** was isolated as an orange solid (165 mg, 390  $\mu$ mol). Yield 78%. –  $R_f$  = 0.45 ( $CH_2Cl_2/MeOH$  9:1). – FTIR-ATR (neat) 3061,

2955, 2934, 2856, 2818, 2226, 1592, 1487, 1365, 1242, 1165, 1087, 926, 812, 768, 690  $\text{cm}^{-1}$ . –  $^1\text{H}$  NMR (300 MHz,  $\text{CDCl}_3$ )  $\delta$  = 7.59 – 7.50 (m, 2H), 7.40 – 7.20 (m, 7H), 2.74 – 2.60 (m, 4H), 2.43 (s, 3H), 1.98 – 1.88 (m, 2H), 1.79 – 1.68 (m, 4H), 1.68 – 1.38 (m, 7H), 1.24 – 1.10 (m, 1H) ppm. –  $^{13}\text{C}$  NMR (126 MHz,  $\text{CDCl}_3$ )  $\delta$  = 144.9, 139.6, 132.9, 129.4, 129.1, 128.4, 128.0, 126.1, 79.5, 71.0, 59.4, 47.2, 38.1, 25.7, 23.5, 23.1, 21.8 ppm. – HRMS (ESI-TOF, positive mode):  $m/z$ : calcd for  $\text{C}_{25}\text{H}_{31}\text{N}_2\text{O}_2\text{S}$  423.2101, found 423.2128  $[\text{M}+\text{H}]^+$ .

#### *N*-Allyl-4-methyl-*N*-(3-phenyl-3-(pyrrolidin-1-yl)prop-1-yn-1-yl)benzenesulfonamide

**(6j)**

Following the **General Procedure F**, the title compound **6j** was isolated as an off-white viscous oil (77 mg, 195  $\mu\text{mol}$ ). Yield 80%. –  $R_f$  = 0.20 (cyclohexane/EtOAc 7:3). – FTIR-ATR (neat) 3084, 3061, 3028, 2963, 2928, 2874, 2810, 2237, 1646, 1597, 1493, 1449, 1363, 1291, 1166, 1089, 1028, 928, 862, 758, 660  $\text{cm}^{-1}$ . –  $^1\text{H}$  NMR (500 MHz,  $\text{CDCl}_3$ )  $\delta$  = 7.79 – 7.75 (m, 2H), 7.46 (dd,  $J$  = 7.1, 1.8 Hz, 2H), 7.34 – 7.27 (m, 5H), 5.77 (ddt,  $J$  = 16.6, 10.1, 6.3 Hz, 1H), 5.26 (dd,  $J$  = 17.1, 1.4 Hz, 1H), 5.22 (dd,  $J$  = 10.2, 1.2 Hz, 1H), 4.79 (s, 1H), 4.01 (dq,  $J$  = 6.4, 1.4 Hz, 2H), 2.58 – 2.46 (m, 4H), 2.44 (s, 3H), 1.75 – 1.69 (m, 4H) ppm. –  $^{13}\text{C}$  NMR (126 MHz,  $\text{CDCl}_3$ )  $\delta$  = 144.7, 139.7, 134.7, 131.2, 129.8, 128.3, 128.2, 128.0, 127.6, 120.2, 79.7, 67.5, 58.6, 54.4, 50.0, 23.5, 21.8 ppm. – HRMS (ESI-TOF, positive mode):  $m/z$ : calcd for  $\text{C}_{23}\text{H}_{27}\text{N}_2\text{O}_2\text{S}$  395.1788, found 395.1784  $[\text{M}+\text{H}]^+$ .

#### *N*-Allyl-4-methyl-*N*-((1-(pyrrolidin-1-yl)cyclohexyl)ethynyl)benzenesulfonamide (6k)

Following the **General Procedure F**, the title compound **6k** was isolated as an off-white viscous oil (76 mg, 197  $\mu\text{mol}$ ). Yield 79%. –  $R_f$  = 0.36 ( $\text{CH}_2\text{Cl}_2/\text{MeOH}$  9:1). – FTIR-ATR (neat) 3070, 2929, 2854, 2812, 2232, 1645, 1597, 1494, 1364, 1167, 1123, 1090, 1034, 925, 812, 760, 660  $\text{cm}^{-1}$ . –  $^1\text{H}$  NMR (500 MHz,  $\text{CDCl}_3$ )  $\delta$  = 7.81 – 7.77 (m, 2H), 7.33 (d,  $J$  = 8.1 Hz, 2H), 5.73 (ddt,  $J$  = 16.6, 10.1, 6.3 Hz, 1H), 5.26 – 5.18 (m, 2H), 3.97 (dt,  $J$  = 6.3, 1.3 Hz, 2H), 2.65 – 2.57 (m, 4H), 2.45 (s, 3H), 1.90 – 1.83 (m, 2H), 1.73 – 1.68 (m, 4H), 1.62 – 1.52 (m, 3H), 1.50 – 1.36 (m, 4H), 1.19 – 1.09 (m, 1H) ppm. –  $^{13}\text{C}$  NMR (126 MHz,  $\text{CDCl}_3$ )  $\delta$  = 144.6, 134.7, 131.3, 129.7, 128.0, 120.0, 78.7, 70.7, 59.4, 54.6, 47.1, 38.1, 25.7, 23.5, 23.1, 21.8 ppm. – HRMS (ESI-TOF, positive mode):  $m/z$ : calcd for  $\text{C}_{22}\text{H}_{31}\text{N}_2\text{O}_2\text{S}$  387.2101, found 387.2127  $[\text{M}+\text{H}]^+$ .

#### Methyl 4-(((4-methyl-*N*-(3-phenyl-3-(pyrrolidin-1-yl)prop-1-yn-1-yl)phenyl)sulfonamido)-butanoate (6n)

Following the **General Procedure F**, the title compound **6n** was isolated as a yellow viscous oil (110 mg, 242  $\mu\text{mol}$ ). Yield 97%. –  $R_f$  = 0.15 (cyclohexane/EtOAc 7:3). – FTIR-ATR (neat) 3062, 3029, 2954, 2875, 2807, 2236, 1735, 1627, 1597, 1493, 1448, 1363, 1166, 1090, 1029, 900, 814, 701, 668  $\text{cm}^{-1}$ . –  $^1\text{H}$  NMR (500 MHz,  $\text{CDCl}_3$ )  $\delta$  = 7.78 – 7.73 (m, 2H), 7.49 – 7.44 (m, 2H), 7.35 – 7.26 (m, 5H), 4.78 (s, 1H), 3.67 (s, 3H), 3.47 – 3.35 (m, 2H), 2.58 – 2.48 (m, 4H), 2.45 – 2.40 (m, 5H), 2.00 (quint,  $J$  = 7.0 Hz, 2H), 1.78 – 1.68 (m, 4H) ppm. –  $^{13}\text{C}$  NMR (126 MHz,  $\text{CDCl}_3$ )  $\delta$  = 173.2, 144.7, 139.7, 134.5, 129.9, 128.3(2), 128.3(0), 127.8, 127.6, 79.4, 67.7, 58.7, 51.8, 50.7, 50.1, 30.5, 23.6, 23.2, 21.8 ppm. – HRMS (ESI-TOF, positive mode):  $m/z$ : calcd for  $\text{C}_{25}\text{H}_{30}\text{N}_2\text{NaO}_4\text{S}$  477.1818, found 477.1835  $[\text{M}+\text{Na}]^+$ .

#### *N*-(2-(1*H*-Indol-3-yl)ethyl)-4-nitro-*N*-(3-phenyl-3-(pyrrolidin-1-yl)prop-1-yn-1-yl)benzenesulfonamide (6o)

Following the **General Procedure F**, the title compound **6o** was isolated as an orange foam (55 mg, 104  $\mu\text{mol}$ ). Yield 77%. –  $R_f$  = 0.14 (cyclohexane/EtOAc 7:3). – FTIR-ATR (neat) 3285, 3102, 3060, 3033, 2961, 2929, 2873, 2808, 2249, 1607, 1527, 1461, 1346, 1308, 1230, 1158,

1093, 925, 853, 735, 606 cm<sup>-1</sup>. – <sup>1</sup>H NMR (500 MHz, CDCl<sub>3</sub>) δ = 8.12 – 8.05 (m, 2H), 7.82 – 7.76 (m, 2H), 7.67 – 7.60 (m, 2H), 7.45 – 7.26 (m, 6H), 7.13 (t, *J* = 7.5 Hz, 1H), 6.99 (s, 1H), 4.98 (s, 1H), 3.38 (t, *J* = 6.4 Hz, 2H), 2.91 (t, *J* = 6.4 Hz, 2H), 2.77 – 2.66 (m, 4H), 1.87 – 1.78 (m, 4H) ppm. – <sup>13</sup>C NMR (126 MHz, CDCl<sub>3</sub>) δ = 149.7, 145.4, 139.6, 138.7, 128.5, 128.0, 127.9, 127.1, 126.7, 124.2, 124.1, 121.9, 118.9, 114.0, 111.7, 77.5, 67.8, 59.0, 50.5, 42.9, 25.5, 23.6 ppm. – HRMS (ESI-TOF, positive mode): *m/z*: calcd for C<sub>29</sub>H<sub>29</sub>N<sub>4</sub>O<sub>4</sub>S 529.1904, found 529.1905 [M+H]<sup>+</sup>.

## V. References

- [1] W. Huang, Q. Shen, J. Wang, X. Zhou, *J. Org. Chem.* **2008**, *73*, 1586–1589.
- [2] M. H. S. A. Hamid, C. L. Allen, G. W. Lamb, A. C. Maxwell, H. C. Maytum, A. J. A. Watson, J. M. J. Williams, *J. Am. Chem. Soc.* **2009**, *131*, 1766–1774.
- [3] A. Kumar, G. Ye, Y. Ahmadibeni, K. Parang, *J. Org. Chem.* **2006**, *71*, 7915–7918.
- [4] J. D. Wilden, L. Geldeard, C. C. Lee, D. B. Judd, S. Caddick, *Chem. Commun.* **2007**, 1074–1076.
- [5] Y. Liu, Y. Huang, H. Song, Y. Liu, Q. Wang, *Chem. – Eur. J.* **2015**, *21*, 5337–5340.
- [6] K. Miyazawa, T. Koike, M. Akita, *Adv. Synth. Catal.* **2014**, *356*, 2749–2755.
- [7] A. Becker, C. P. Grugel, B. Breit, *Org. Lett.* **2021**, *23*, 3788–3792.
- [8] Q. Cai, Q. Yin, S.-L. You, *Asian J. Org. Chem.* **2014**, *3*, 408–411.
- [9] S. J. Mansfield, C. D. Campbell, M. W. Jones, E. A. Anderson, *Chem. Commun.* **2015**, *51*, 3316–3319.
- [10] X. Zhang, R. P. Hsung, H. Li, *Chem. Commun.* **2007**, *0*, 2420–2422.
- [11] B. Yao, Z. Liang, T. Niu, Y. Zhang, *J. Org. Chem.* **2009**, *74*, 4630–4633.
- [12] X. Zhang, Y. Zhang, J. Huang, R. P. Hsung, K. C. M. Kurtz, J. Oppenheimer, M. E. Petersen, I. K. Sagamanova, L. Shen, M. R. Tracey, *J. Org. Chem.* **2006**, *71*, 4170–4177.
- [13] T. Hamada, X. Ye, S. S. Stahl, *J. Am. Chem. Soc.* **2008**, *130*, 833–835.
- [14] K. Dooleweerd, T. Ruhland, T. Skrydstrup, *Org. Lett.* **2009**, *11*, 221–224.
- [15] M. R. Tracey, Y. Zhang, M. O. Frederick, J. A. Mulder, R. P. Hsung, *Org. Lett.* **2004**, *6*, 2209–2212.
- [16] X. Li, M. Jiang, T. Zhan, W. Cao, X. Feng, *Chem. – Asian J.* **2020**, *15*, 1953–1956.
- [17] E. Romain, C. Fopp, F. Chemla, F. Ferreira, O. Jackowski, M. Oestreich, A. Perez-Luna, *Angew. Chem. Int. Ed.* **2014**, *53*, 11333–11337.
- [18] B. S. L. Collins, M. G. Suero, M. J. Gaunt, *Angew. Chem. Int. Ed.* **2013**, *52*, 5799–5802.

## VI. NMR Spectra of Previously Unreported Products

### Precursors of Terminal Ynamides

#### (E)-N-Allyl-N-(1,2-dichlorovinyl)-4-methylbenzenesulfonamide

<sup>1</sup>H NMR (500 MHz) in CDCl<sub>3</sub>

p9-34-210921.10.fid

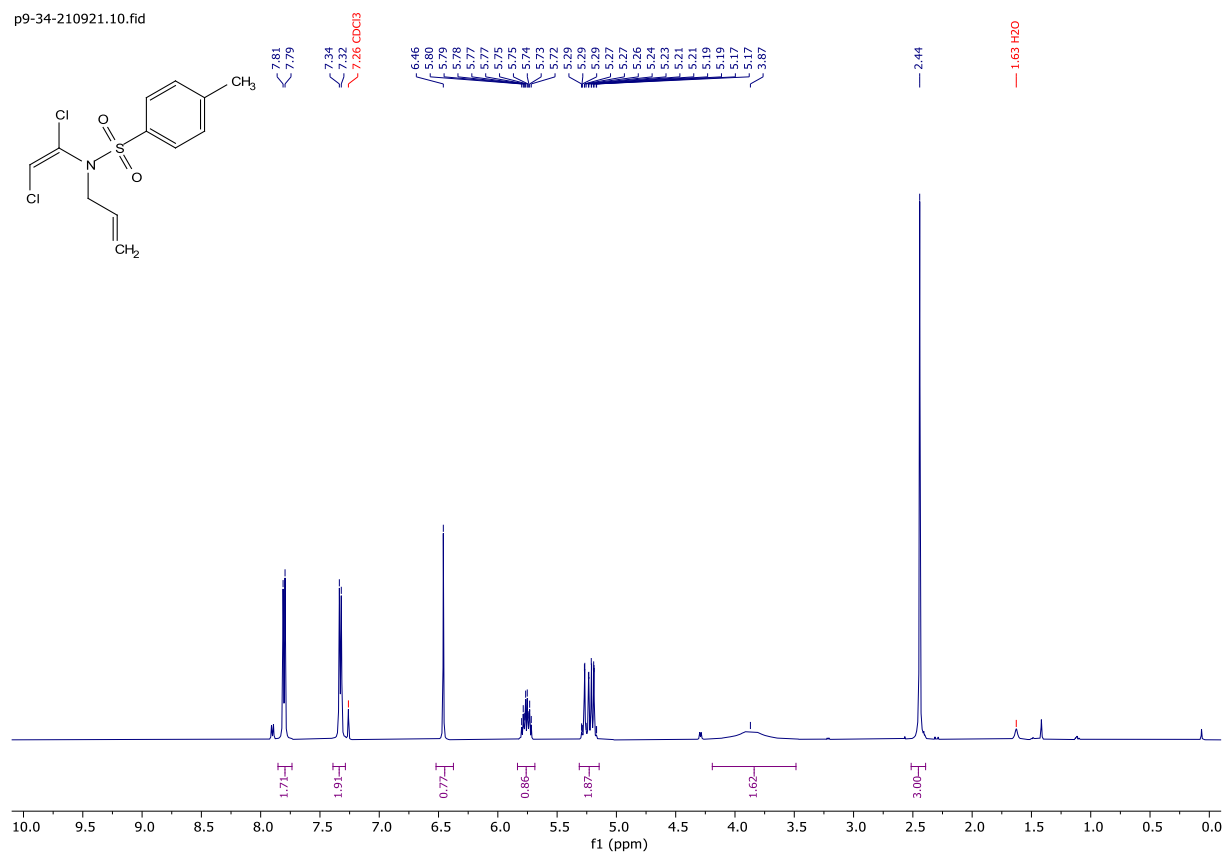

### <sup>13</sup>C NMR (126 MHz) in CDCl<sub>3</sub>

p9-34-210921.12.fid

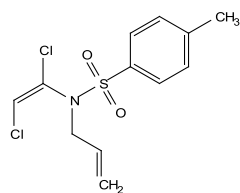

144.79  
135.22  
135.05  
129.84  
129.62  
128.47  
121.68  
120.82  
51.09  
21.78

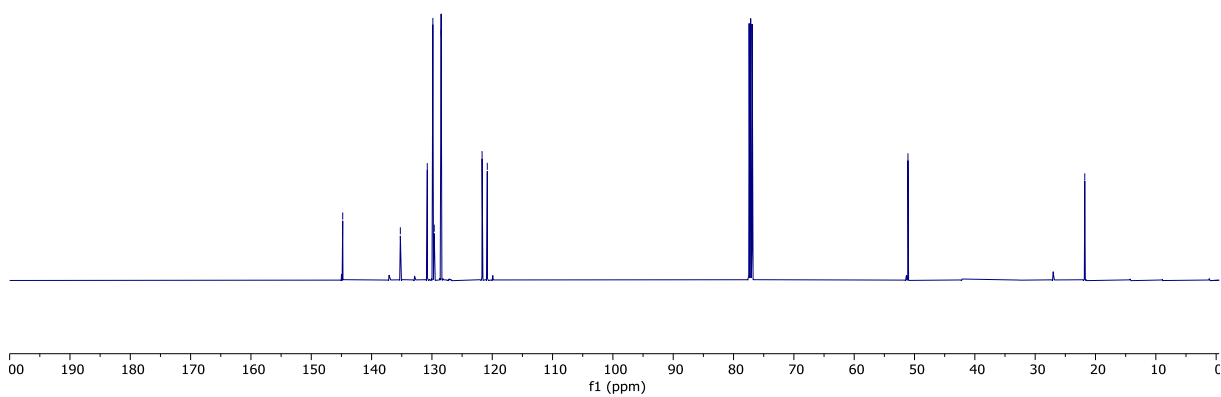

### DEPT135 NMR (126 MHz) in CDCl<sub>3</sub>

p9-34-210921.13.fid

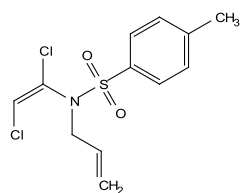

130.68  
129.75  
128.38  
121.60  
120.73  
77.27  
51.00  
21.69

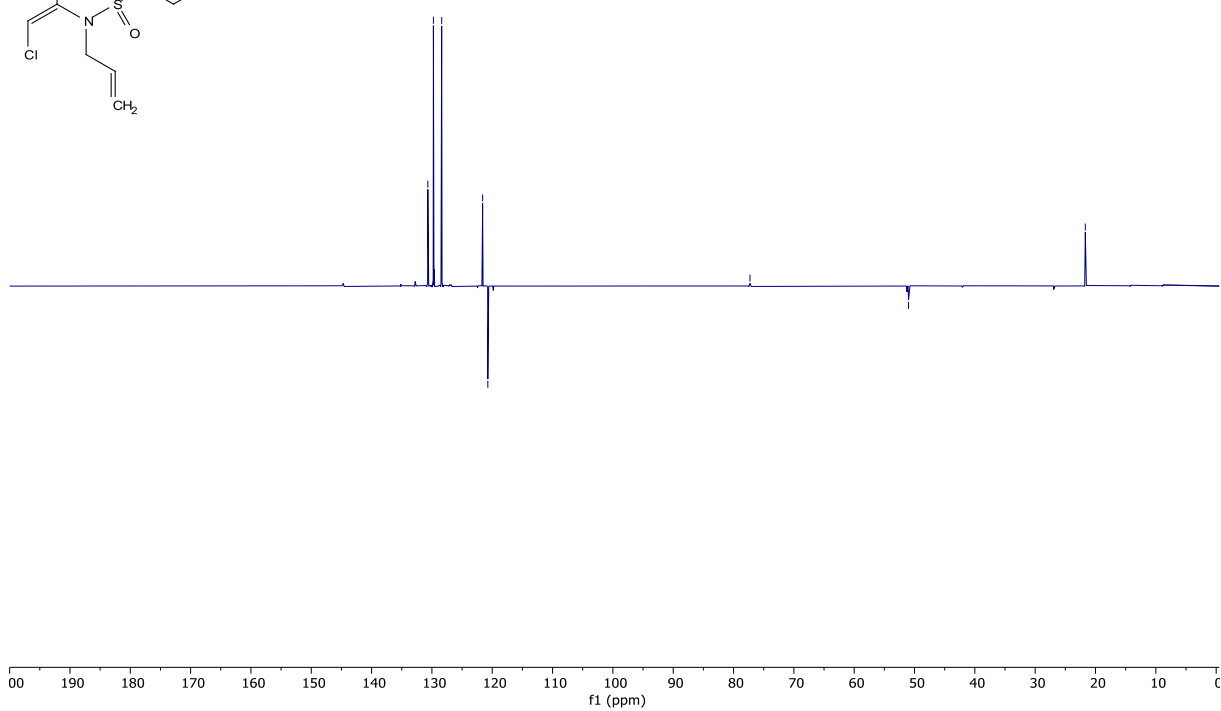

## TIPS-protected ynamides

### Methyl 4-((4-methyl-N-((triisopropylsilyl)ethynyl)phenyl)sulfonamido)butanoate

$^1\text{H}$  NMR (500 MHz) in  $\text{CDCl}_3$

p8-34-210309.10.fcd

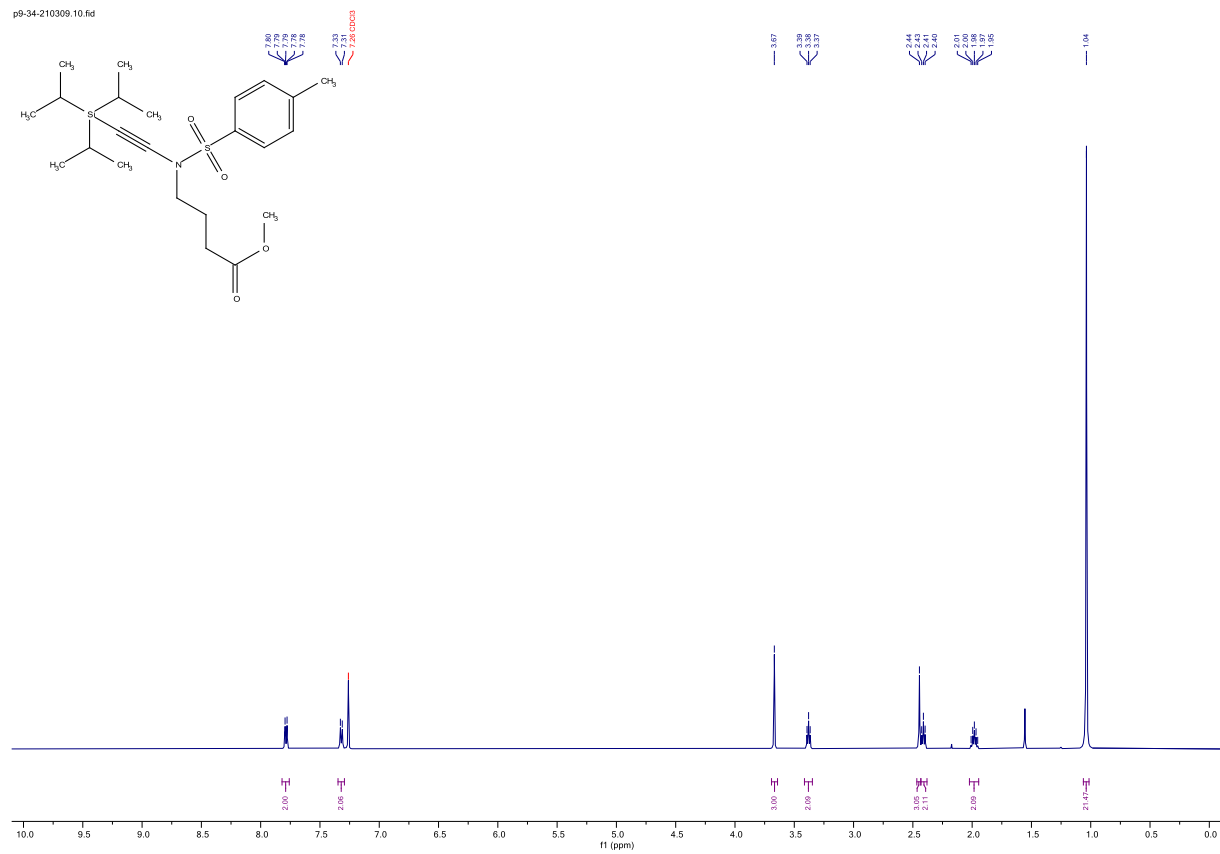



# <sup>13</sup>C NMR (126 MHz) in CDCl<sub>3</sub>

p9-34-210309.11.fid

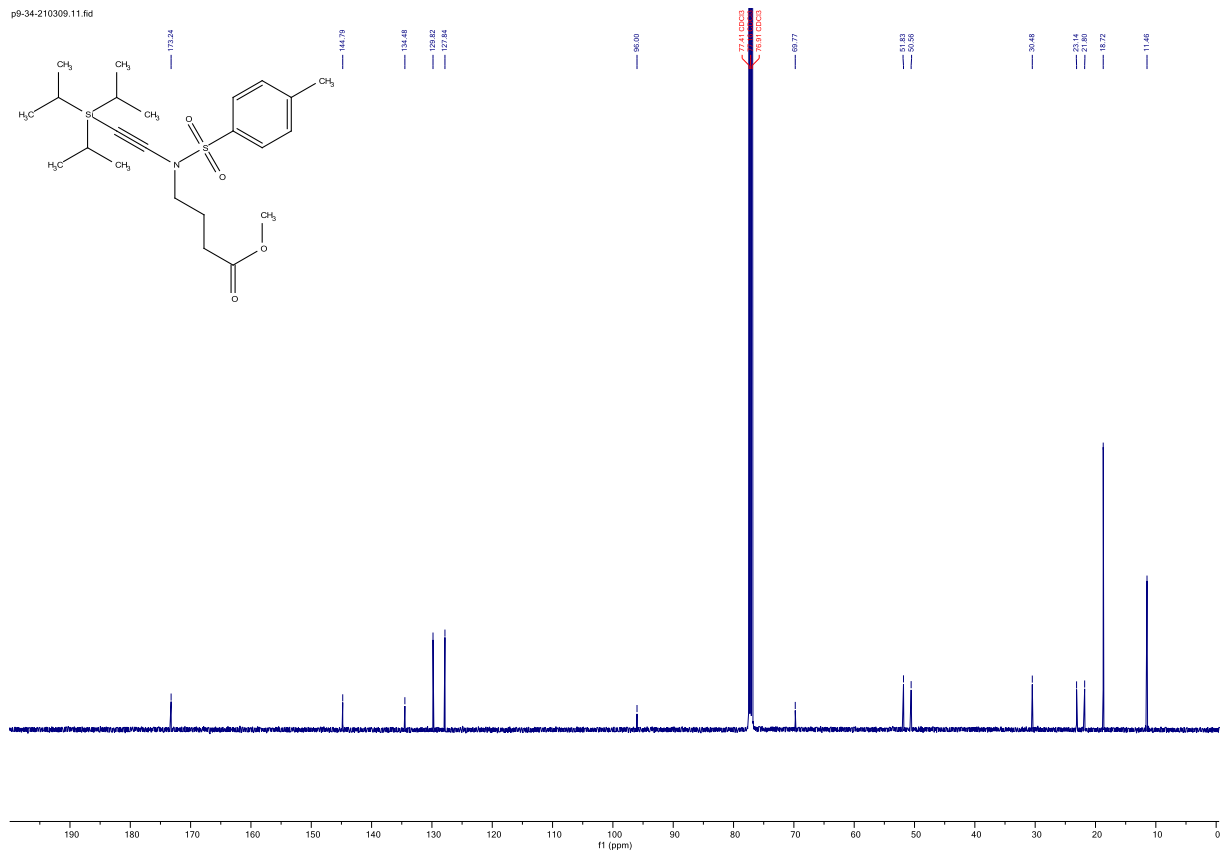

# DEPT135 NMR (126 MHz) in CDCl<sub>3</sub>

p9-34-210309.12.fid

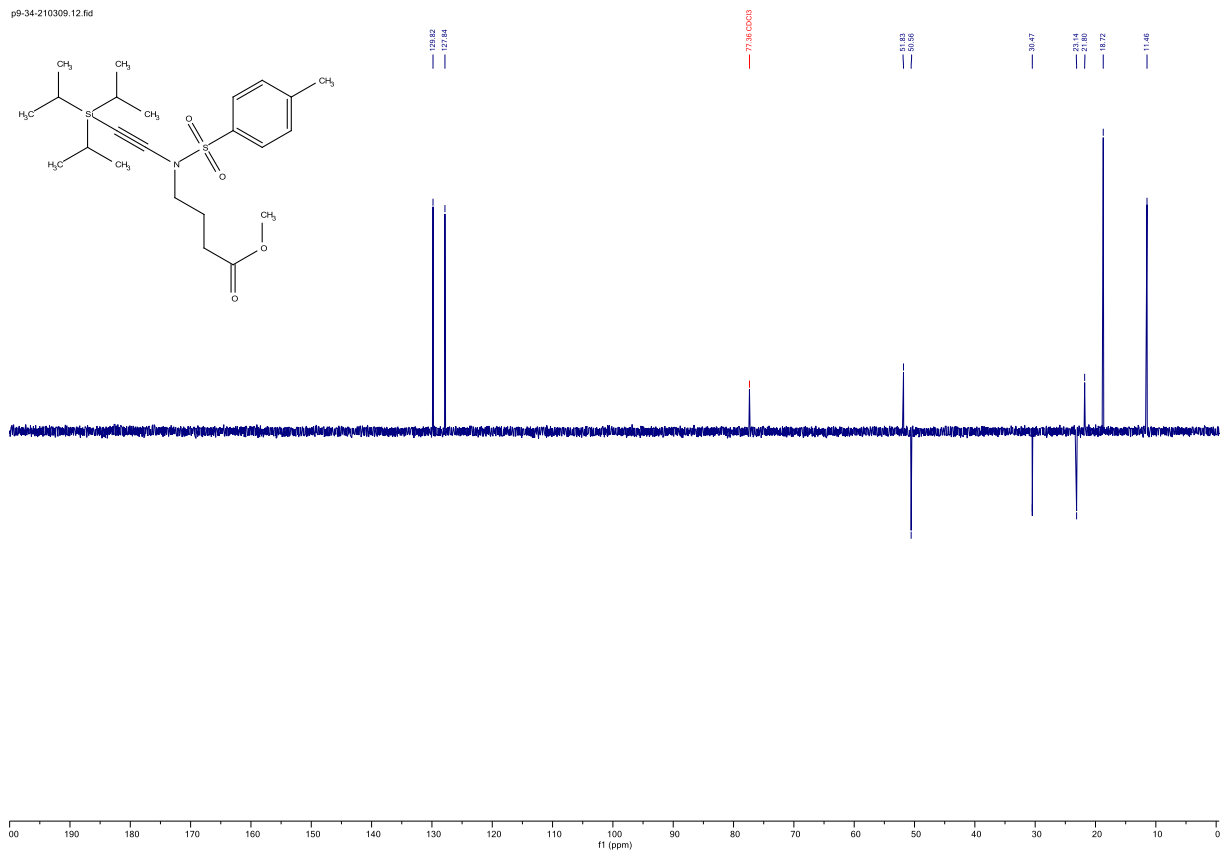





# Terminal Ynamides

## Methyl 4-((*N*-ethynyl-4-methylphenyl)sulfonamido)butanoate

### <sup>1</sup>H NMR (500 MHz) in CDCl<sub>3</sub>

p9-86-210415.10.fid

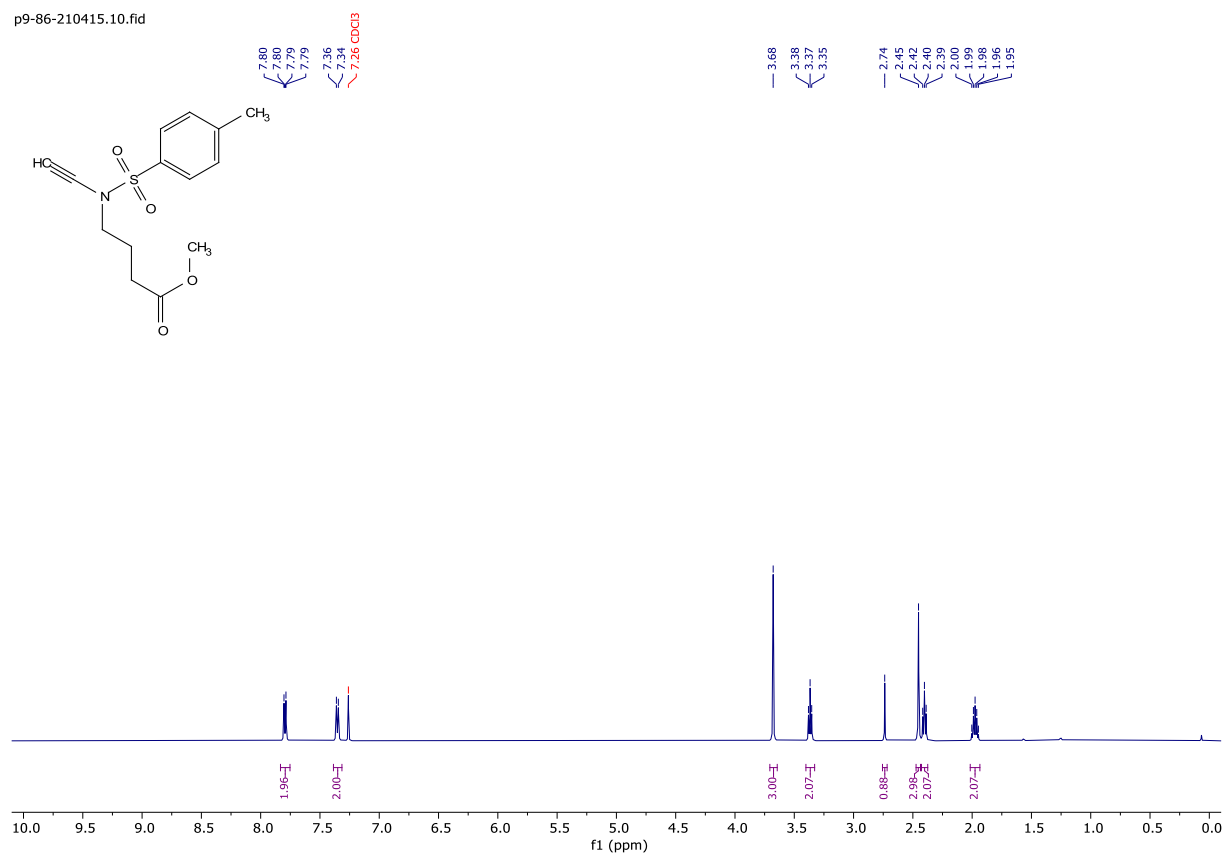

### <sup>13</sup>C NMR (126 MHz) in CDCl<sub>3</sub>

p9-86-210415.11.fid

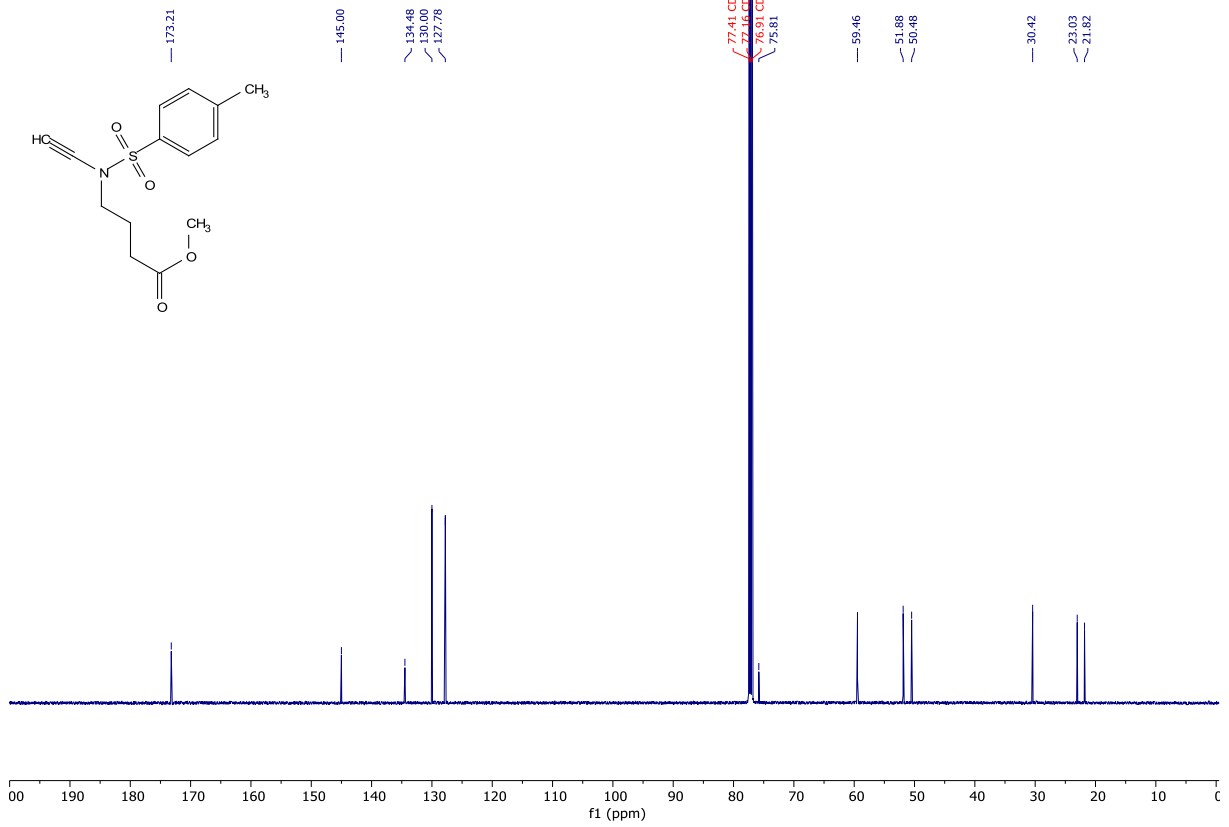

### DEPT135 NMR (126 MHz) in CDCl<sub>3</sub>

p9-86-210415.12.fid

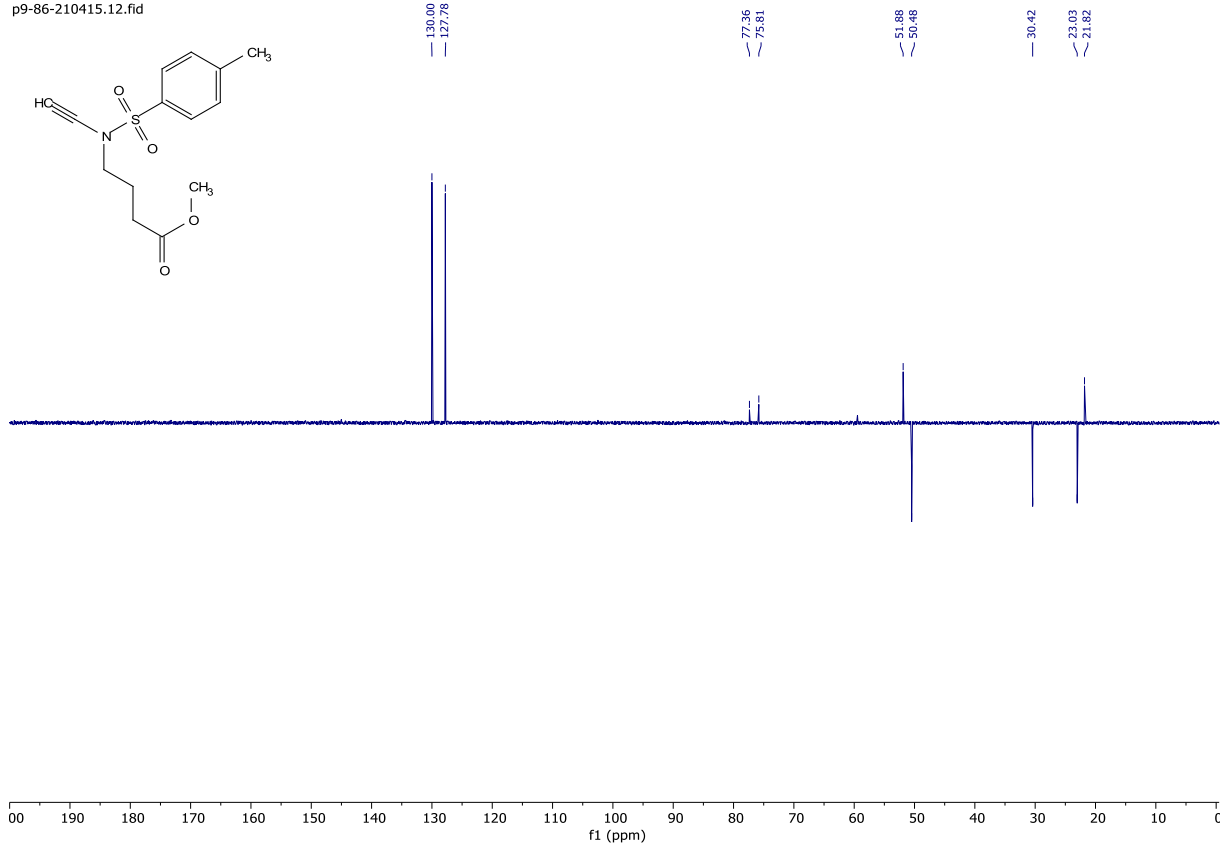

# *N*-(2-(1*H*-Indol-3-yl)ethyl)-*N*-ethynyl-4-nitrobenzenesulfonamide

## <sup>1</sup>H NMR (500 MHz) in CDCl<sub>3</sub>

p9-63-210916.10.fid

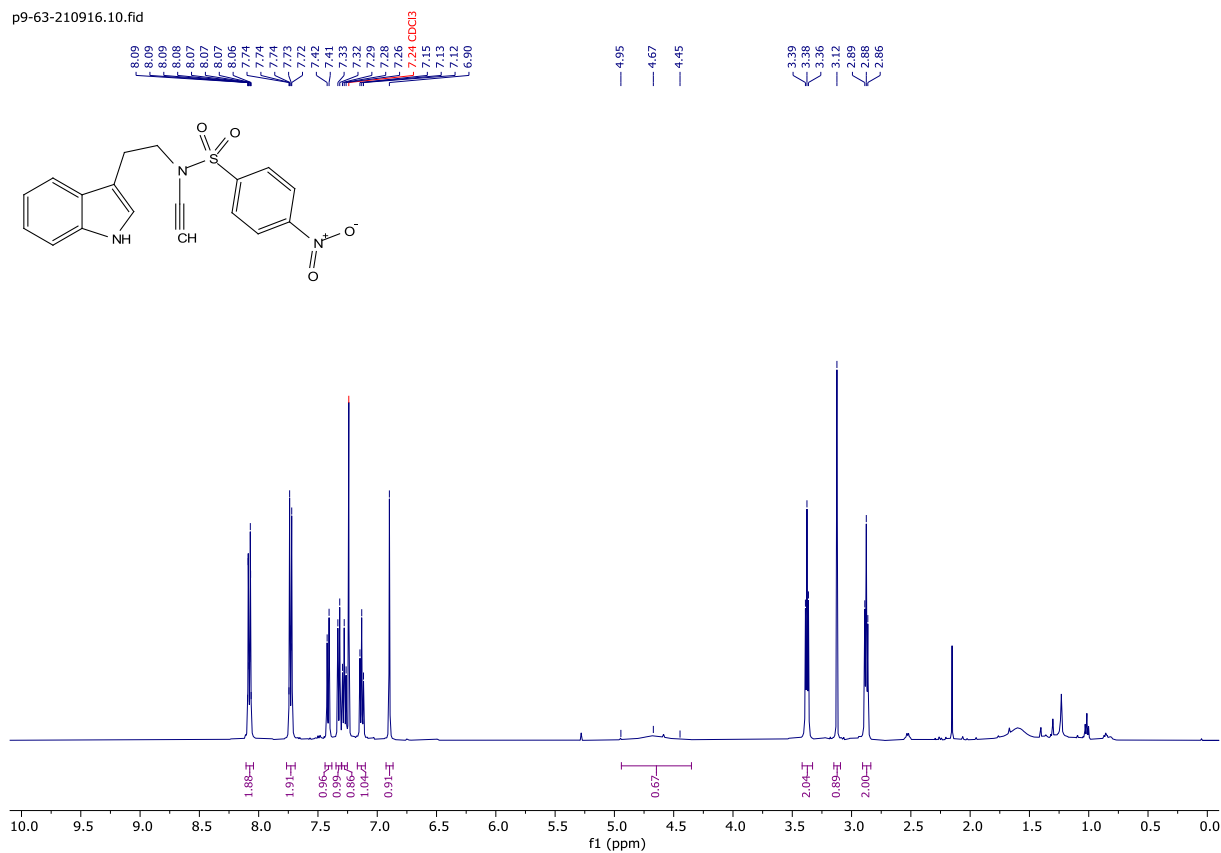

## <sup>13</sup>C NMR (126 MHz) in CDCl<sub>3</sub>

p9-63-210916.12.fid

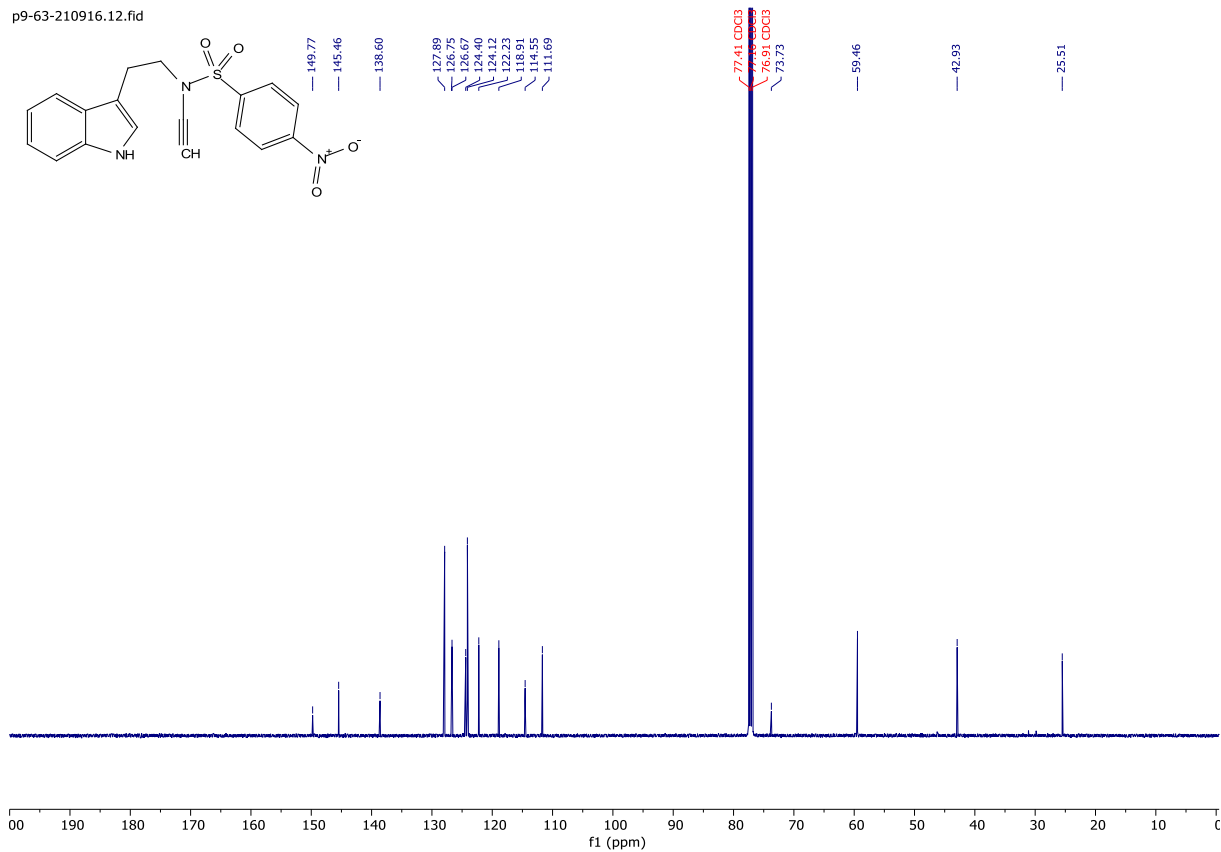

# DEPT135 NMR (126 MHz) in CDCl<sub>3</sub>

p9-63-210916.13.fid

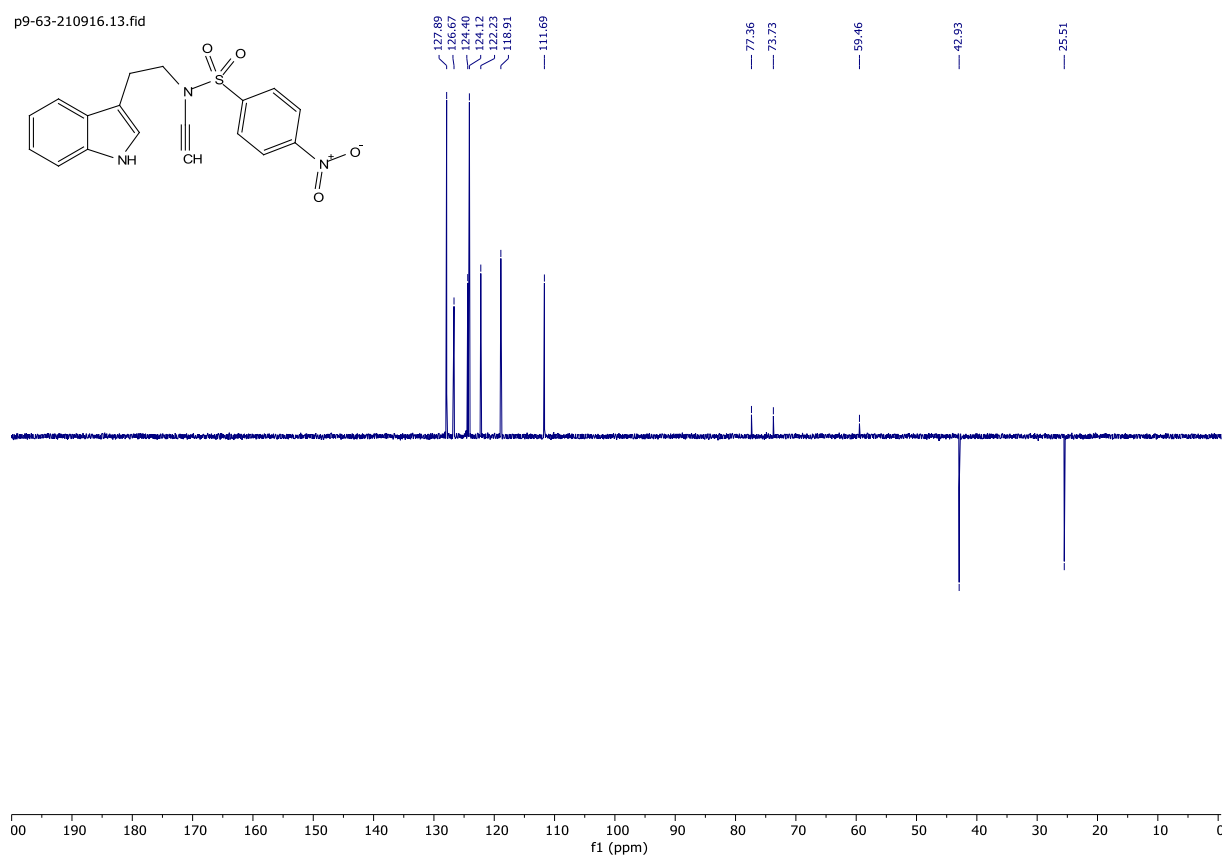

## $\gamma$ -Amino-Ynamides

### *N*-Benzyl-4-methyl-*N*-(3-phenyl-3-(pyrrolidin-1-yl)prop-1-yn-1-yl)benzenesulfonamide

**(4a)**

$^1\text{H}$  NMR (400 MHz) in  $\text{CDCl}_3$

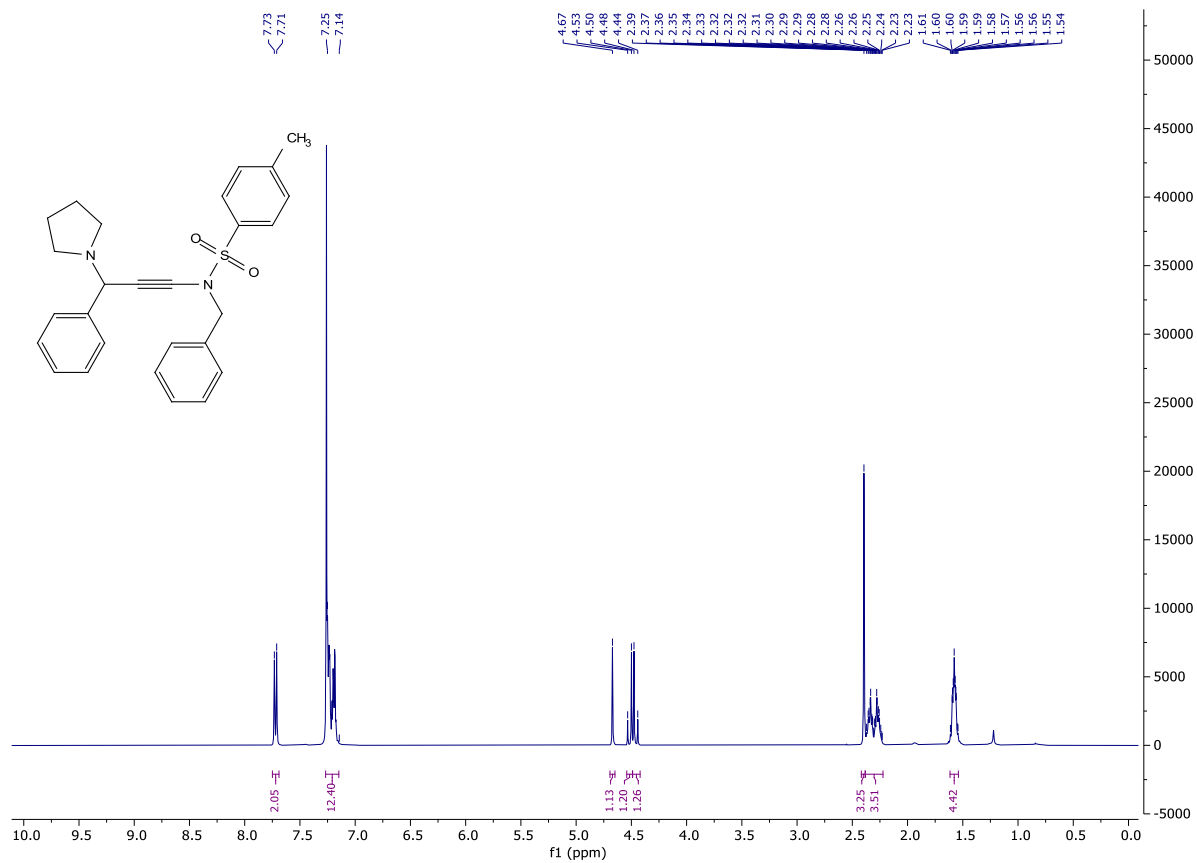



### <sup>13</sup>C NMR (126 MHz) in CDCl<sub>3</sub>

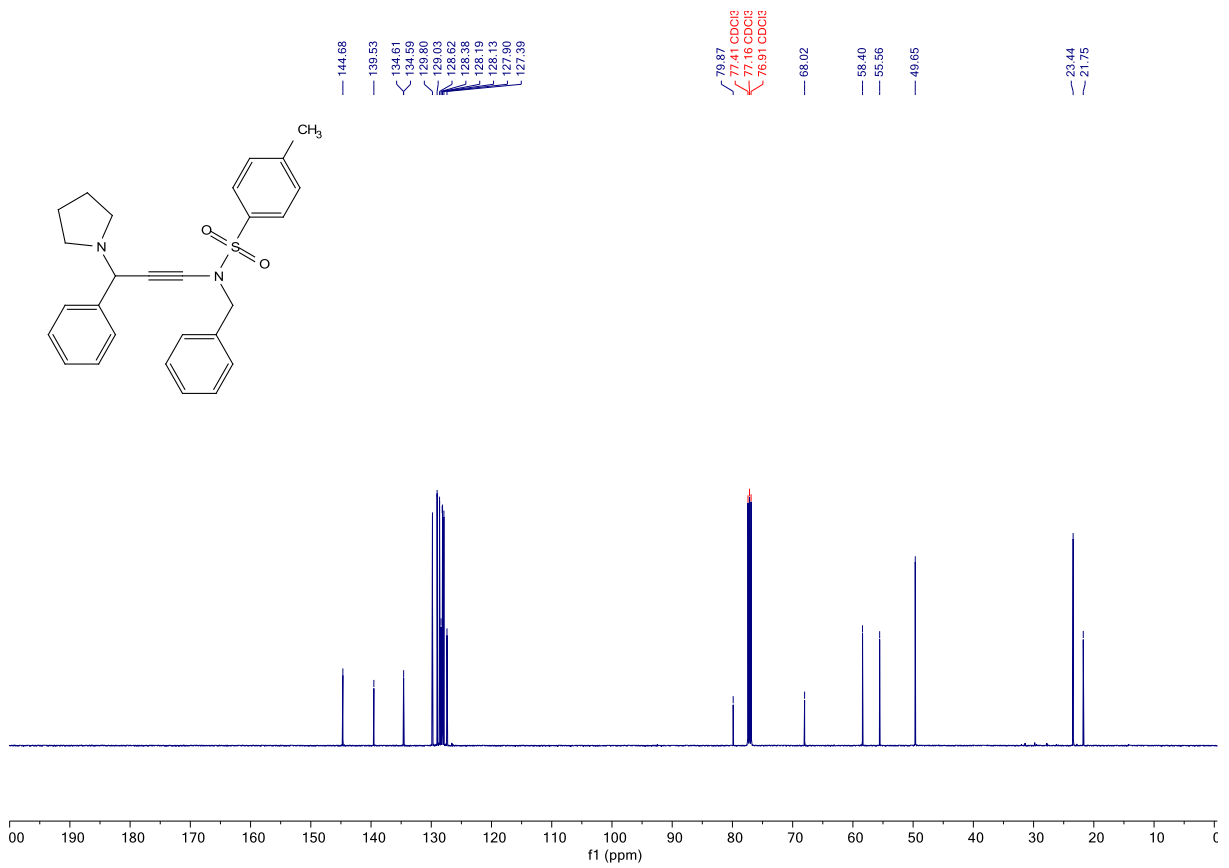

### DEPT135 NMR (126 MHz) in CDCl<sub>3</sub>

p9-5-200128.11.fid

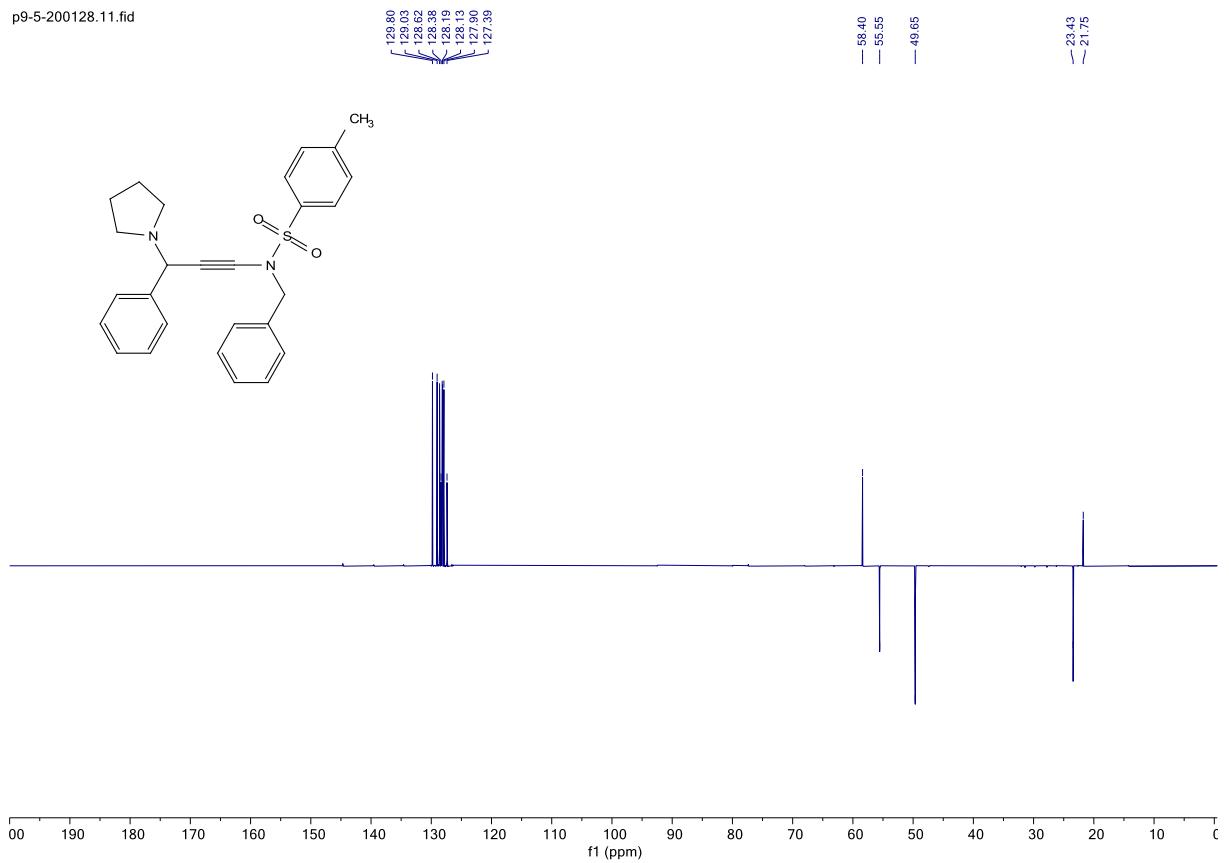

*N*-Benzyl-*N*-(3-(4-chlorophenyl)-3-(pyrrolidin-1-yl)prop-1-yn-1-yl)-4-methylbenzenesulfonamide (**4b**)

<sup>1</sup>H NMR (500 MHz) in CDCl<sub>3</sub>

p9-31-201013.10.fid

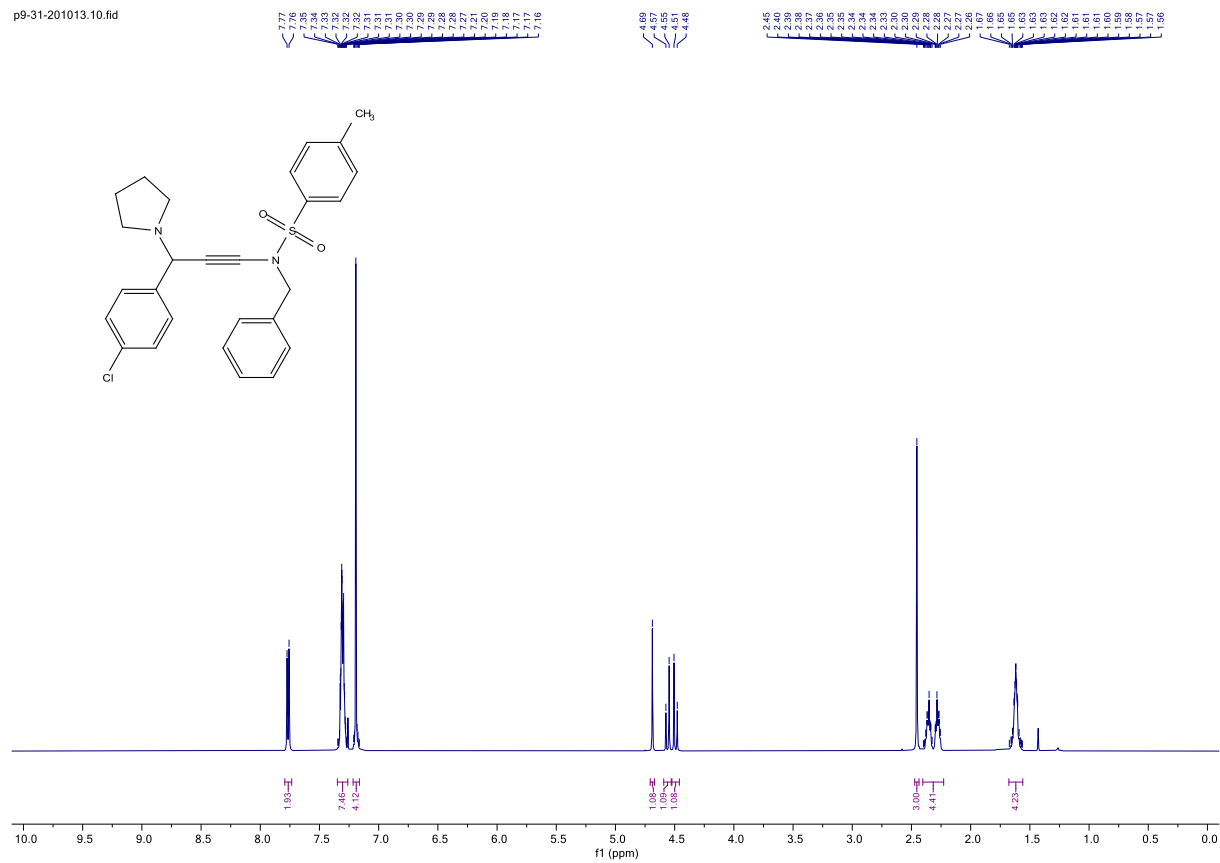

# <sup>13</sup>C NMR (126 MHz) in CDCl<sub>3</sub>

p9-31-201013.11.fid

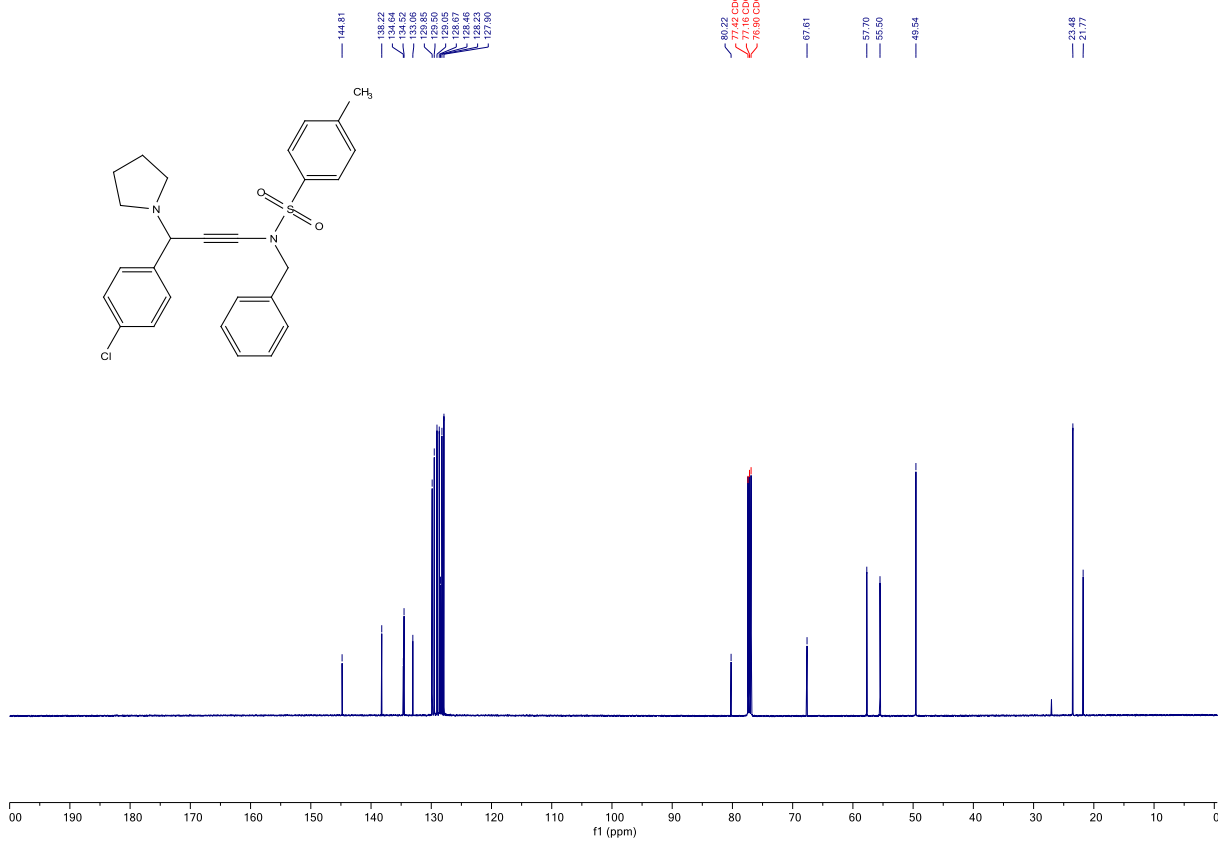

# DEPT135 NMR (126 MHz) in CDCl<sub>3</sub>

p9-31-201013.12.fid

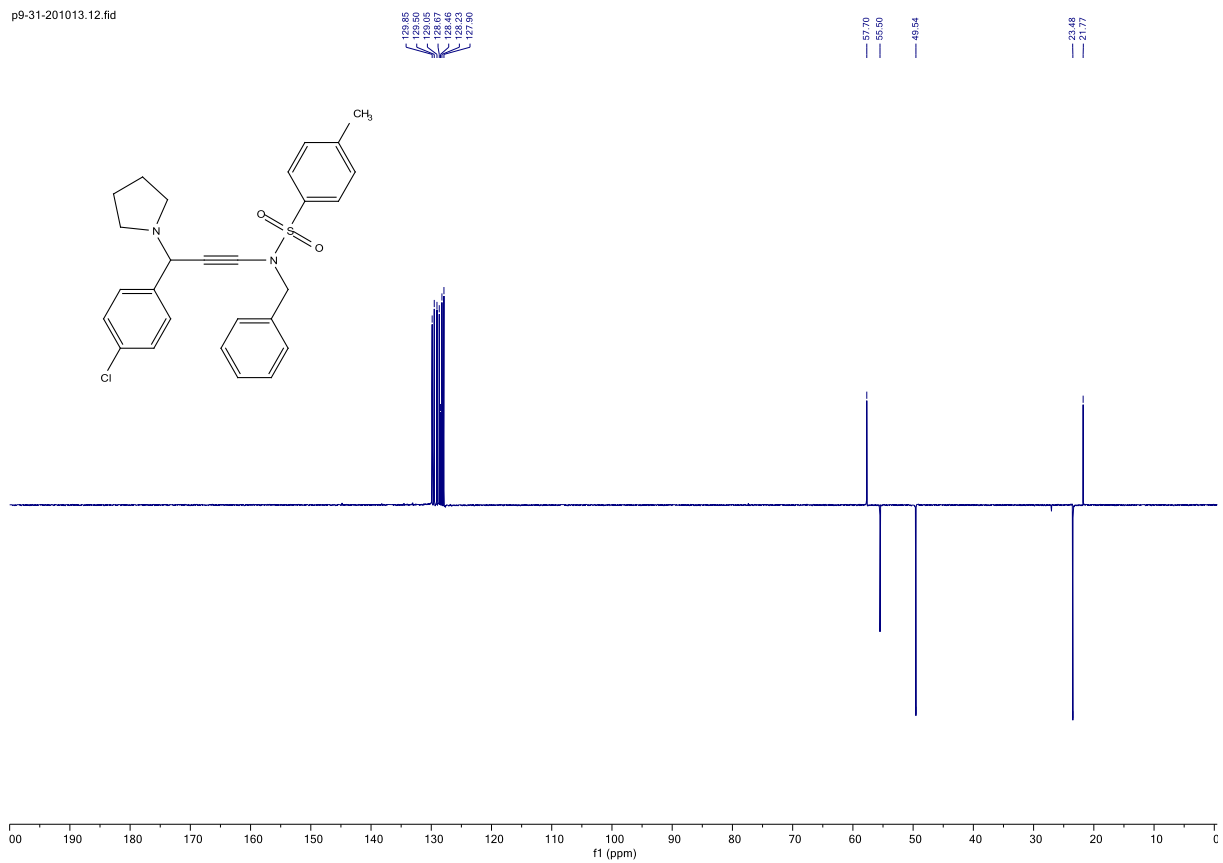



### <sup>13</sup>C NMR (126 MHz) in CDCl<sub>3</sub>

p9-32-201013.11.fid

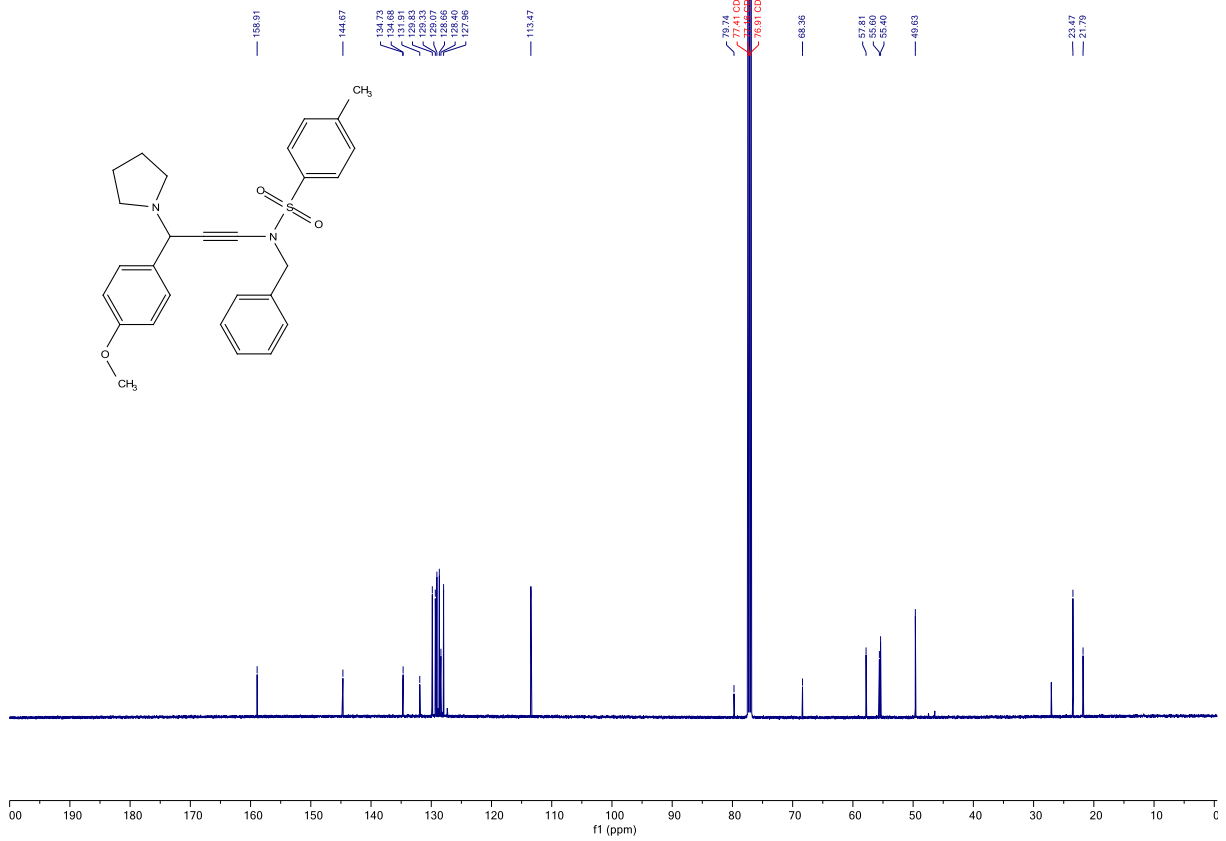

### DEPT135 NMR (126 MHz) in CDCl<sub>3</sub>

p9-32-201013.12.fid

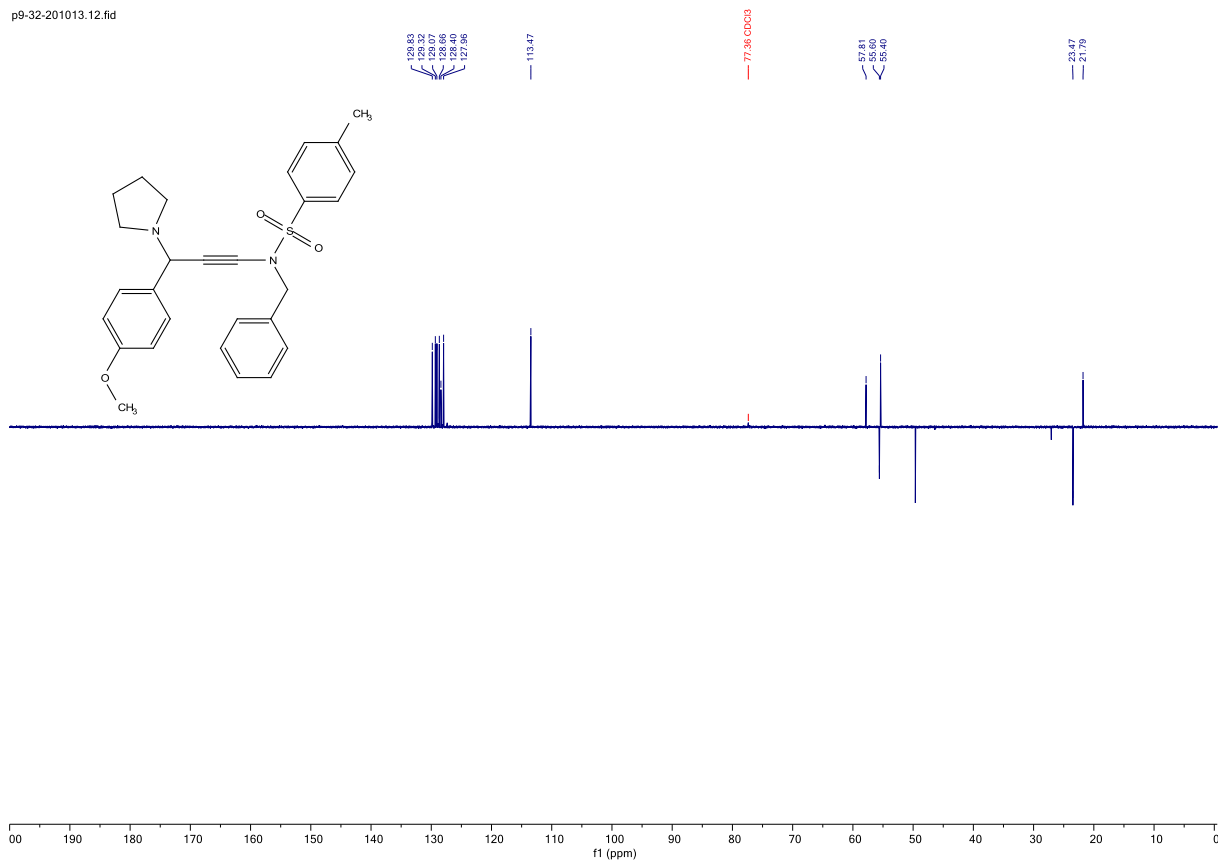

*N*-Benzyl-*N*-(3-(2-hydroxyphenyl)-3-(pyrrolidin-1-yl)prop-1-yn-1-yl)-4-methylbenzenesulfonamide (**4d**)

<sup>1</sup>H NMR (500 MHz) in CD<sub>3</sub>CN

p9-45-210422.10.fid

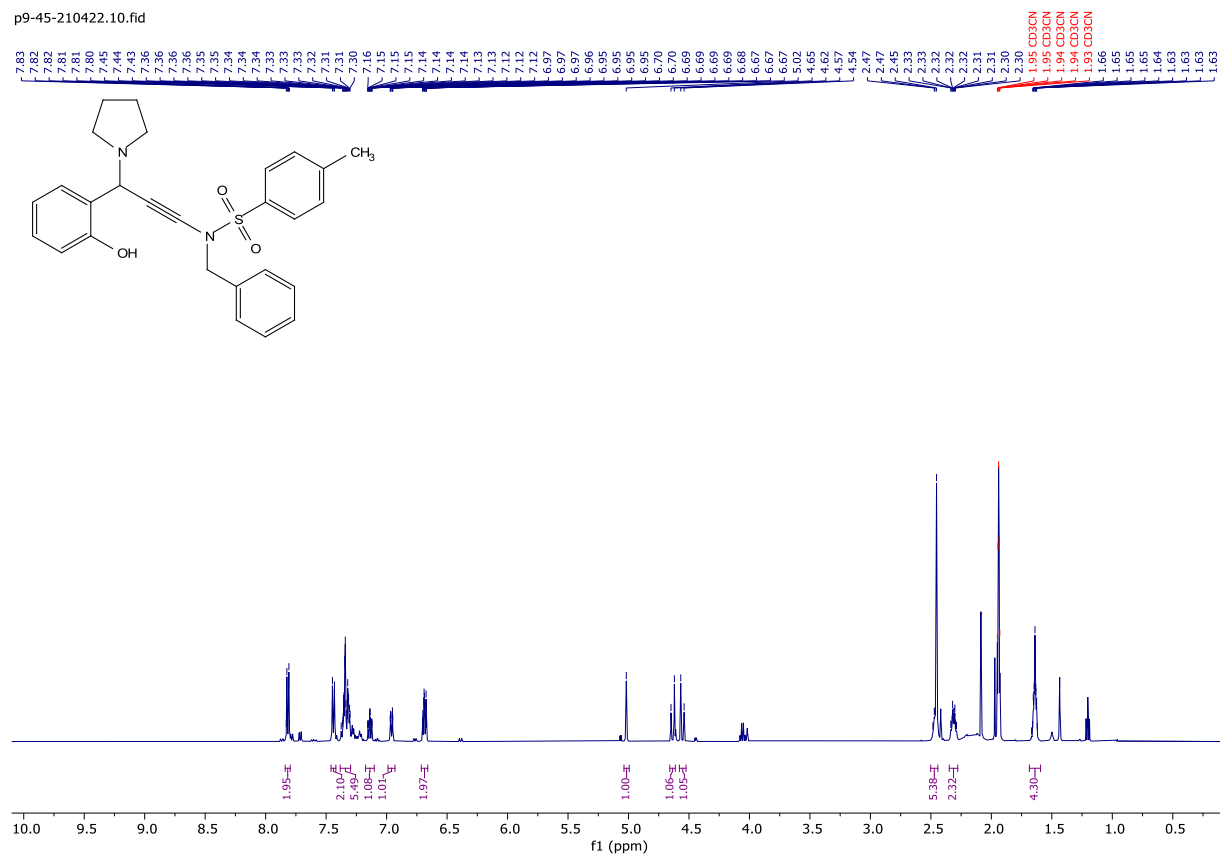

### <sup>13</sup>C NMR (126 MHz) in CD<sub>3</sub>CN

p9-45-210422.11.fid

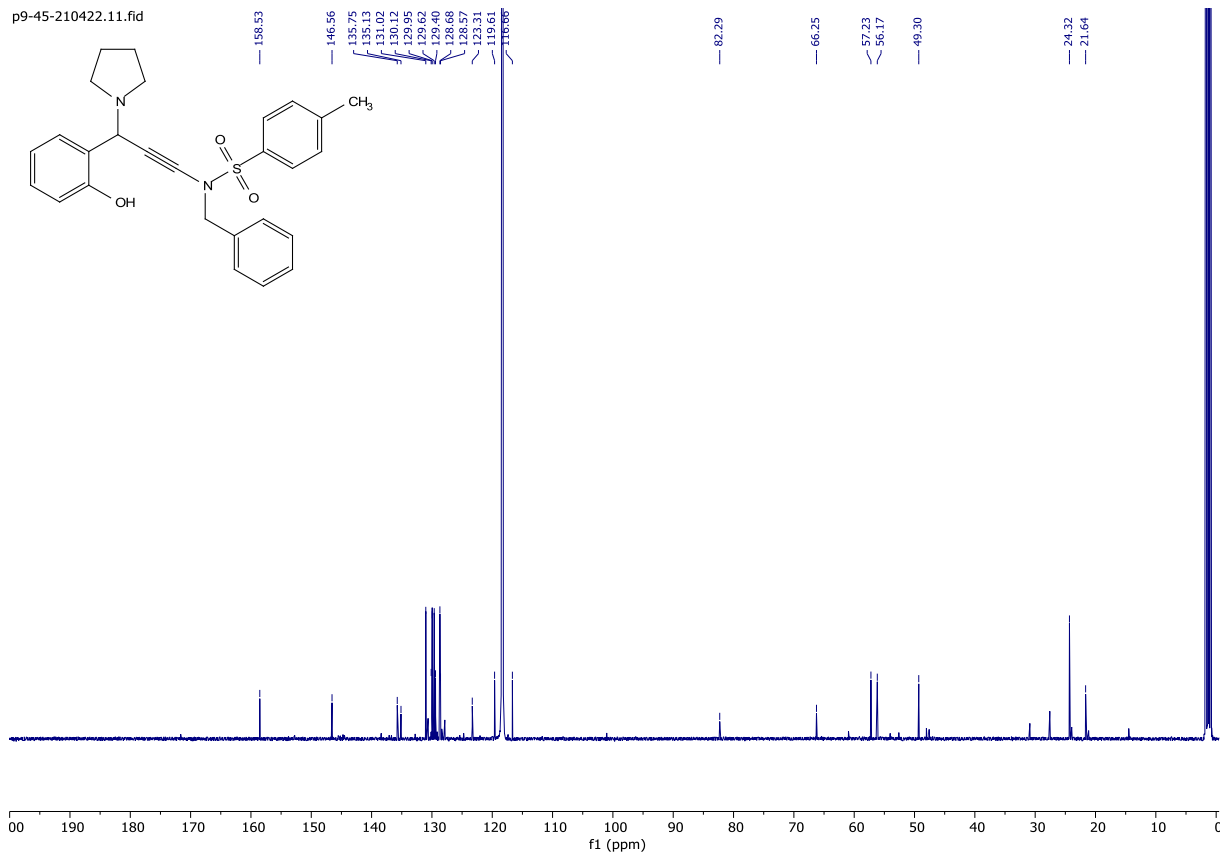

### DEPT135 NMR (126 MHz) in CD<sub>3</sub>CN

p9-45-210422.12.fid

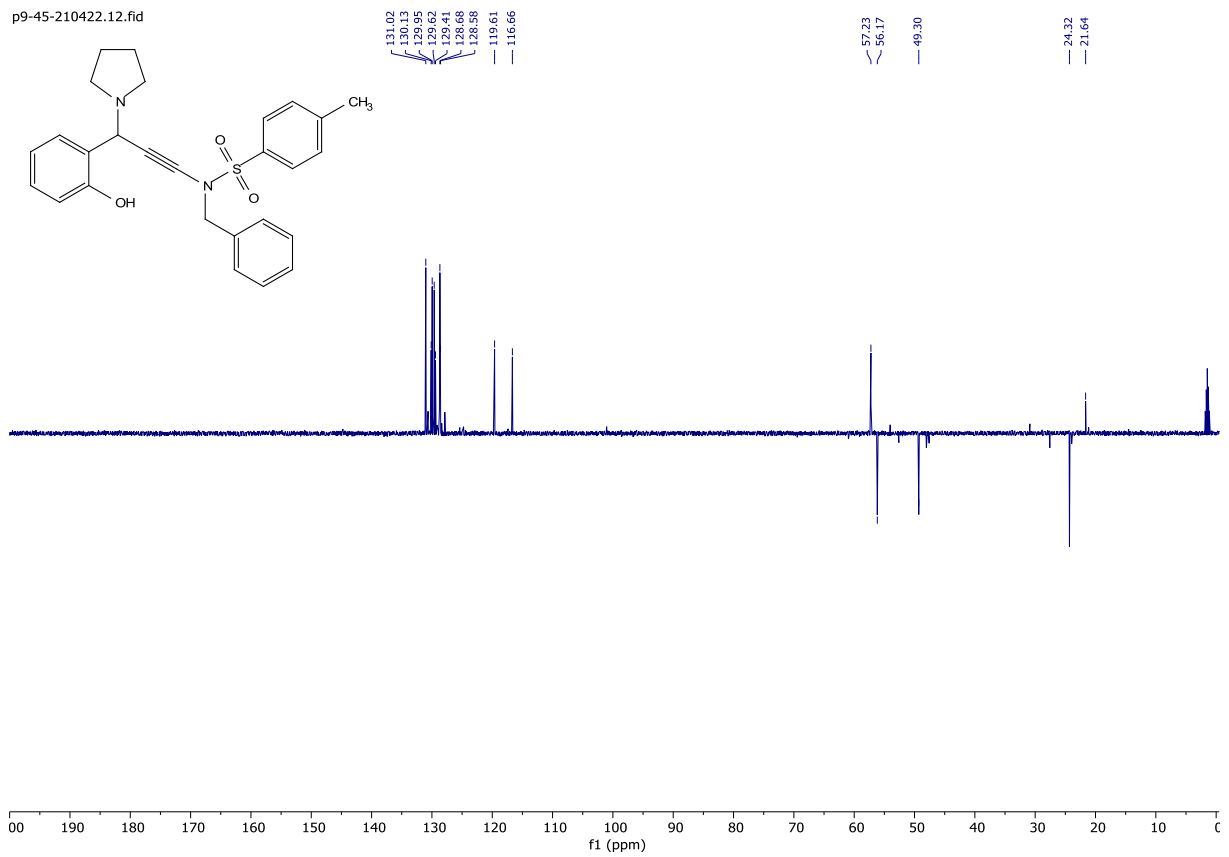

*N*-Benzyl-4-methyl-*N*-(3-(pyridin-3-yl)-3-(pyrrolidin-1-yl)prop-1-yn-1-yl)benzenesulfonamide (**4f**)

<sup>1</sup>H NMR (500 MHz) in CDCl<sub>3</sub>

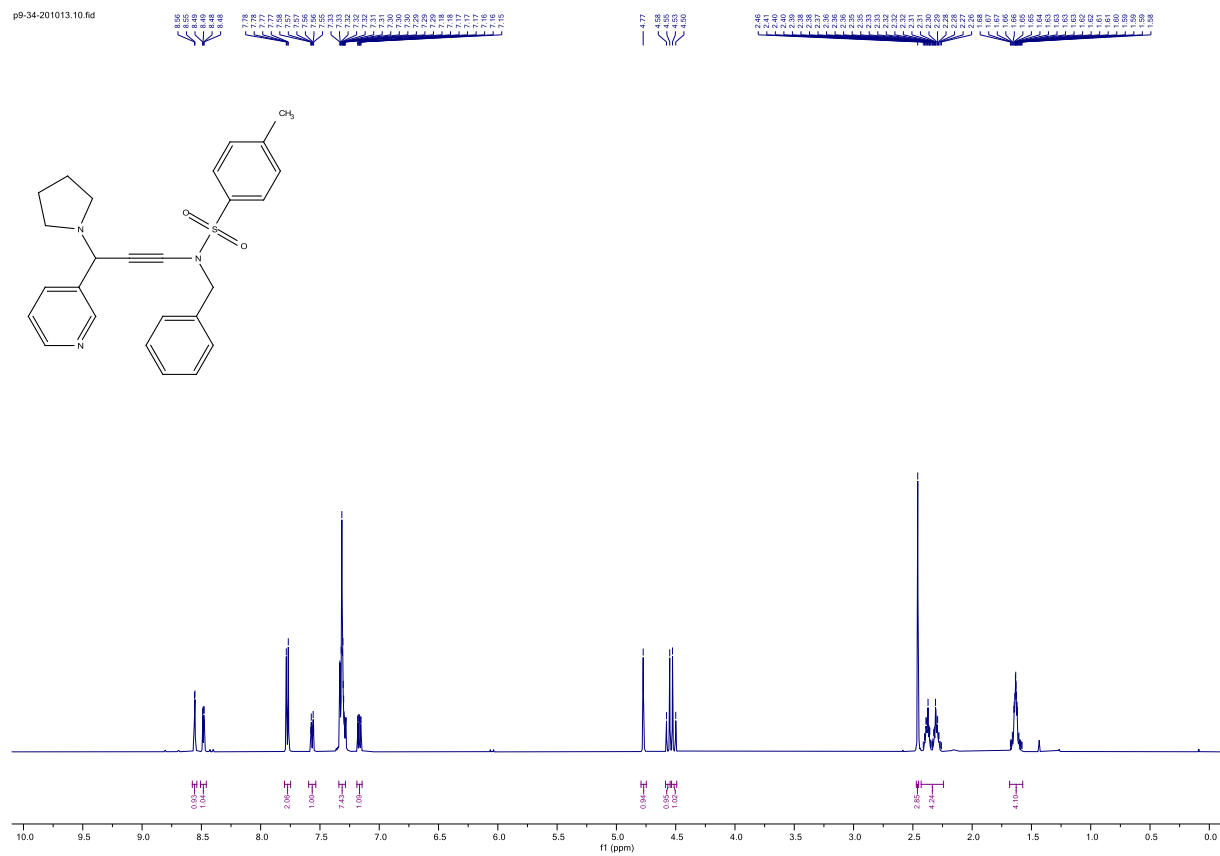



# <sup>13</sup>C NMR (126 MHz) in CDCl<sub>3</sub>

p9-34-201013.11.fid

149.75  
148.74  
144.87  
135.64  
135.18  
134.92  
134.41  
129.87  
129.87  
128.86  
128.86  
123.08  
123.08

80.33

66.90

56.15  
55.46

49.49

23.45  
21.75

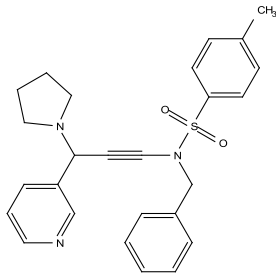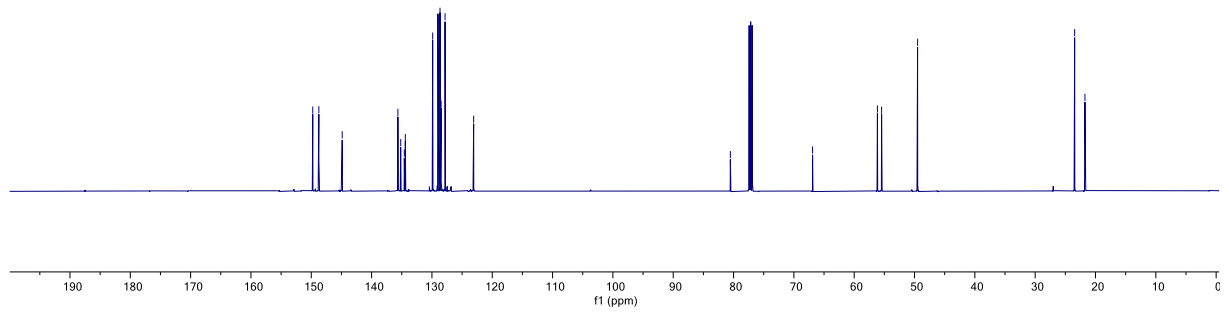

# DEPT135 NMR (126 MHz) in CDCl<sub>3</sub>

p9-34-201013.12.fid

149.75  
148.74  
135.64  
129.87  
129.87  
128.86  
128.86  
123.08

56.15  
55.46

49.49

23.45  
21.75

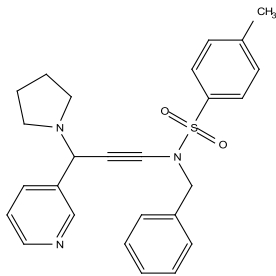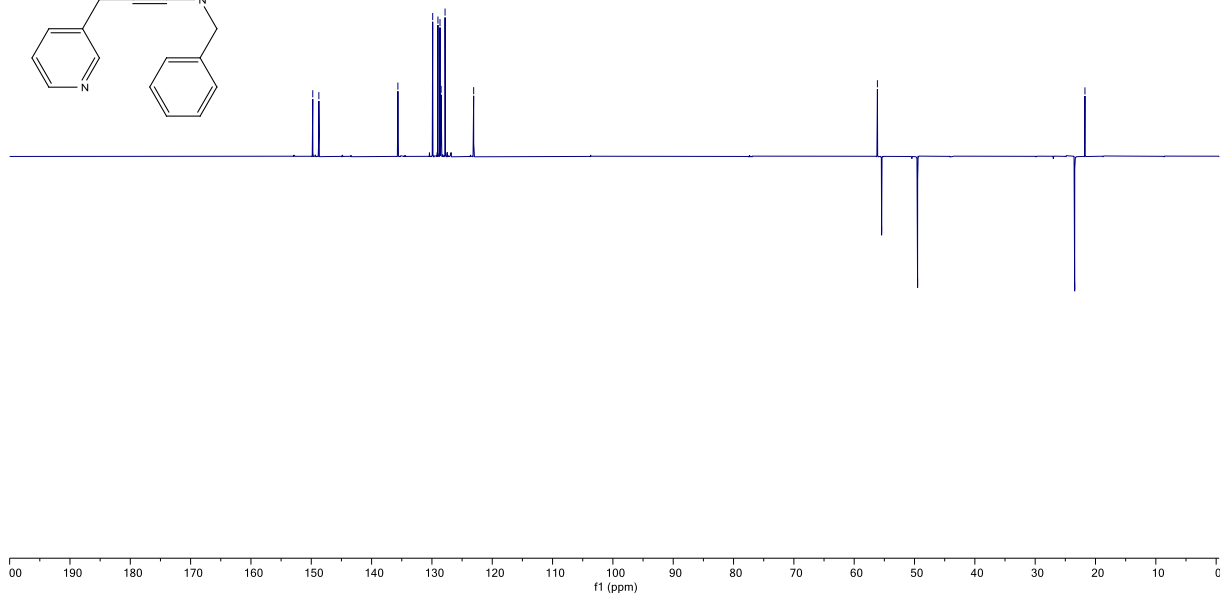

*N*-Benzyl-4-methyl-*N*-(3-(pyrrolidin-1-yl)-3-(thiophen-2-yl)prop-1-yn-1-yl)benzenesulfonamide (**4g**)

<sup>1</sup>H NMR (500 MHz) in CDCl<sub>3</sub>

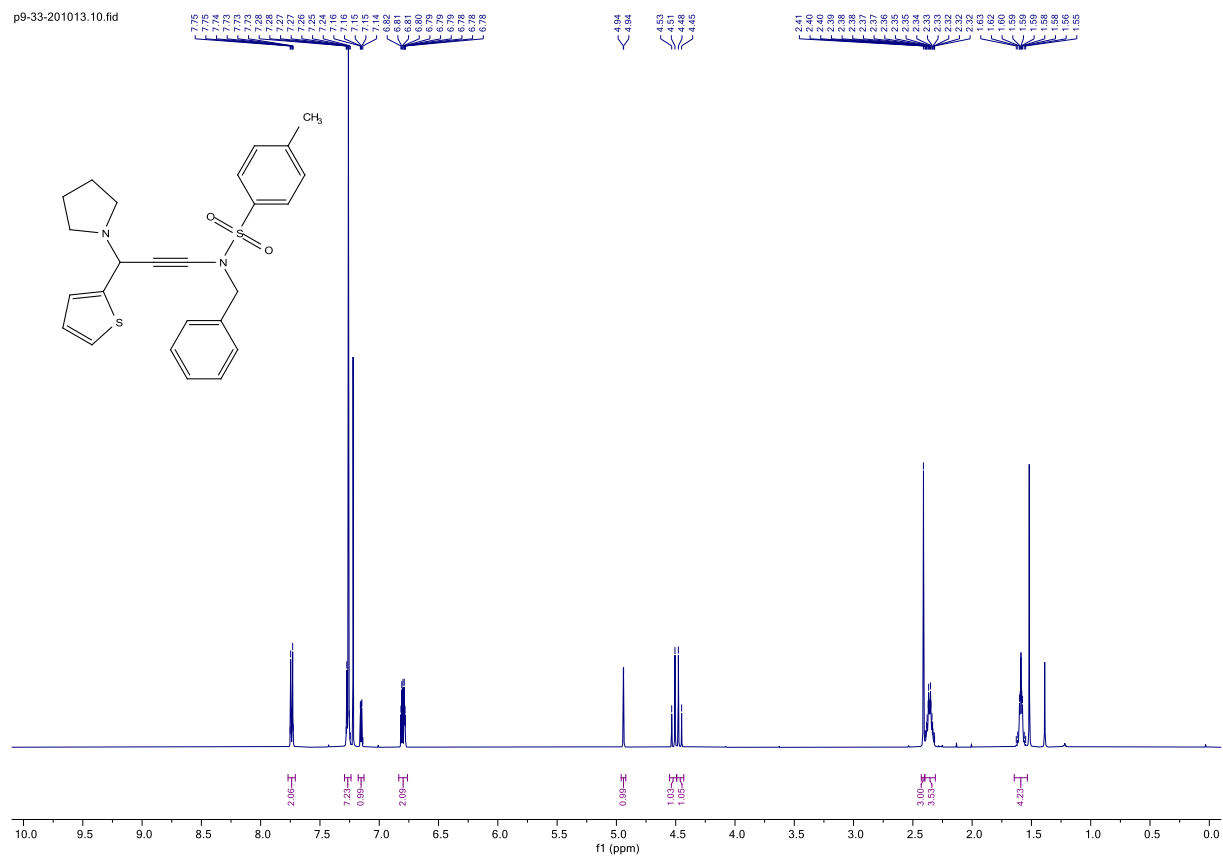

### <sup>13</sup>C NMR (126 MHz) in CDCl<sub>3</sub>

p9-33-201013.11.fid

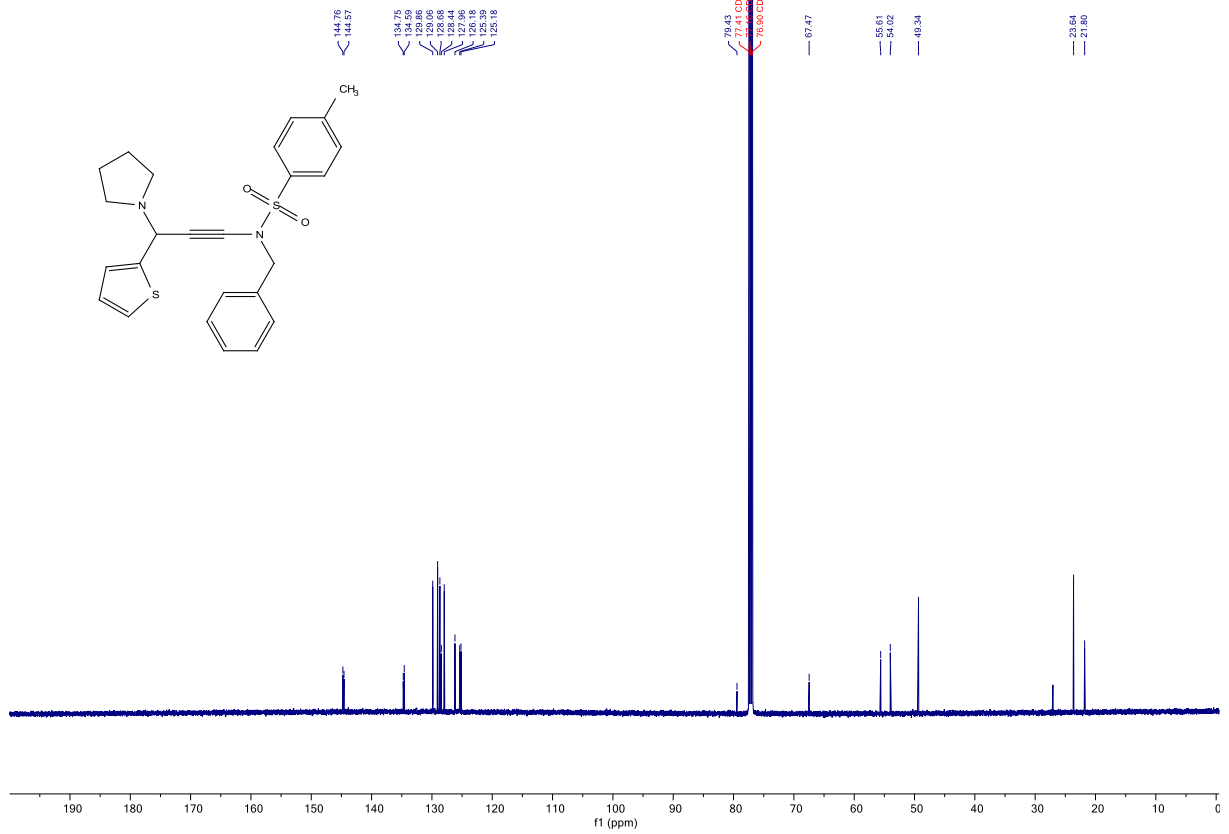

### DEPT135 NMR (126 MHz) in CDCl<sub>3</sub>

p9-33-201013.12.fid

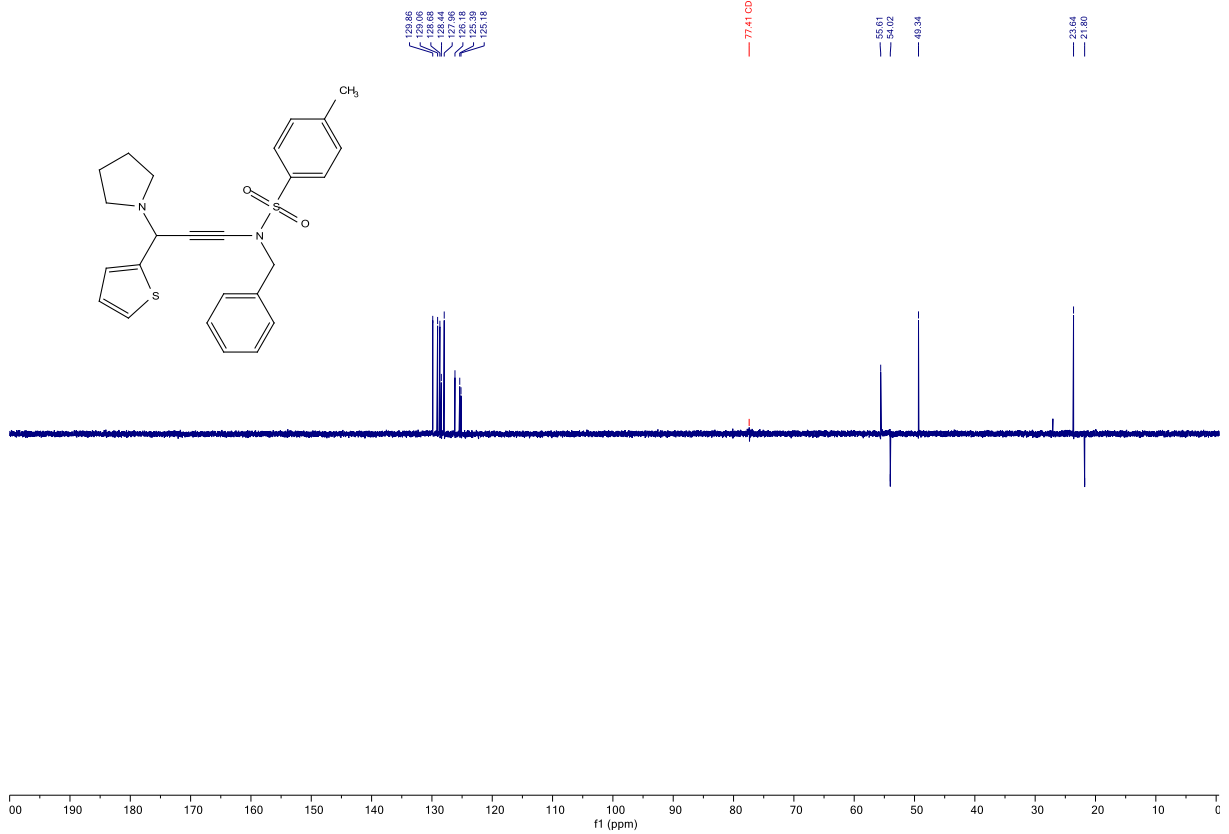



# <sup>13</sup>C NMR (126 MHz) in CDCl<sub>3</sub>

p9-58-201125.11.fid

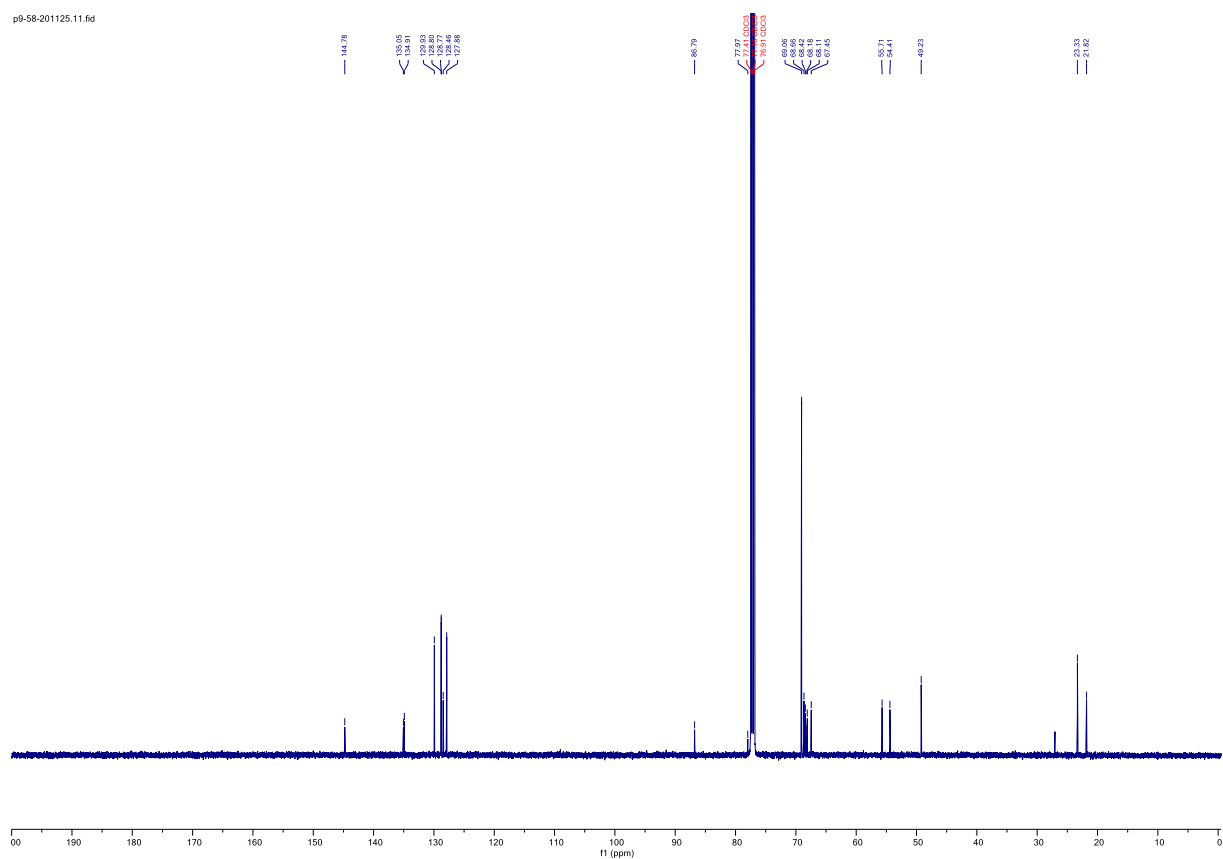

# DEPT135 NMR (126 MHz) in CDCl<sub>3</sub>

p9-58-201125.12.fid

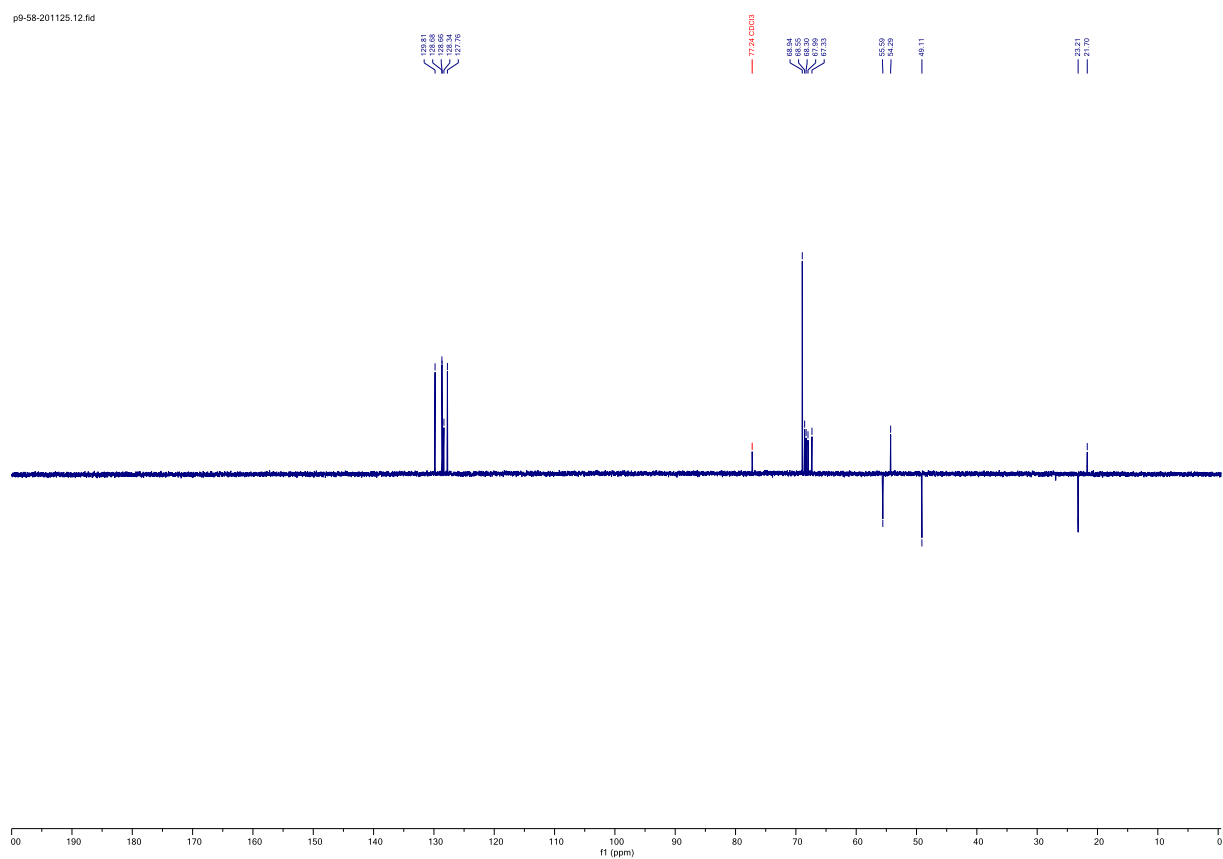

# *N*-Benzyl-4-methyl-*N*-(3-(pyrrolidin-1-yl)non-1-yn-1-yl)benzenesulfonamide (**4i**)

## <sup>1</sup>H NMR (500 MHz) in CDCl<sub>3</sub>

p9-57-201125.10.fid

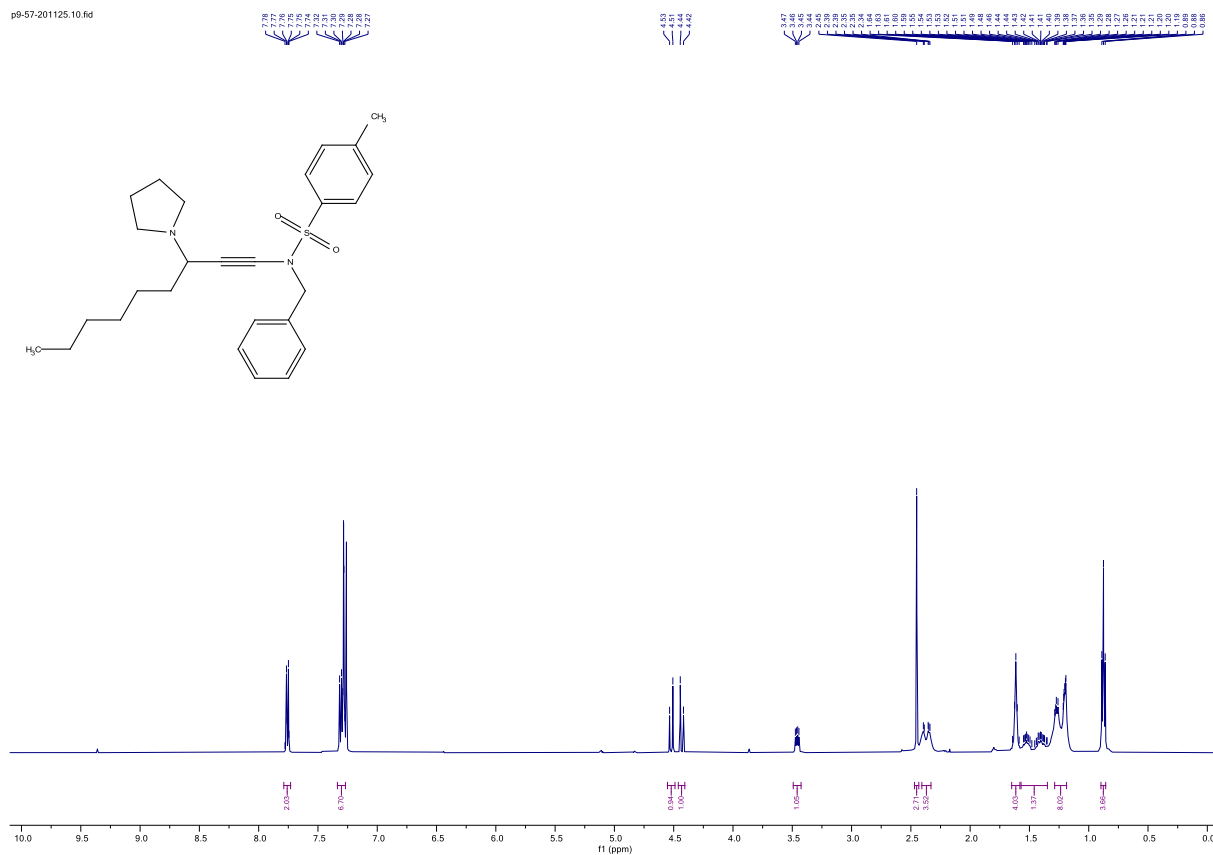

## <sup>13</sup>C NMR (126 MHz) in CDCl<sub>3</sub>

p9-57-201125.12.fid

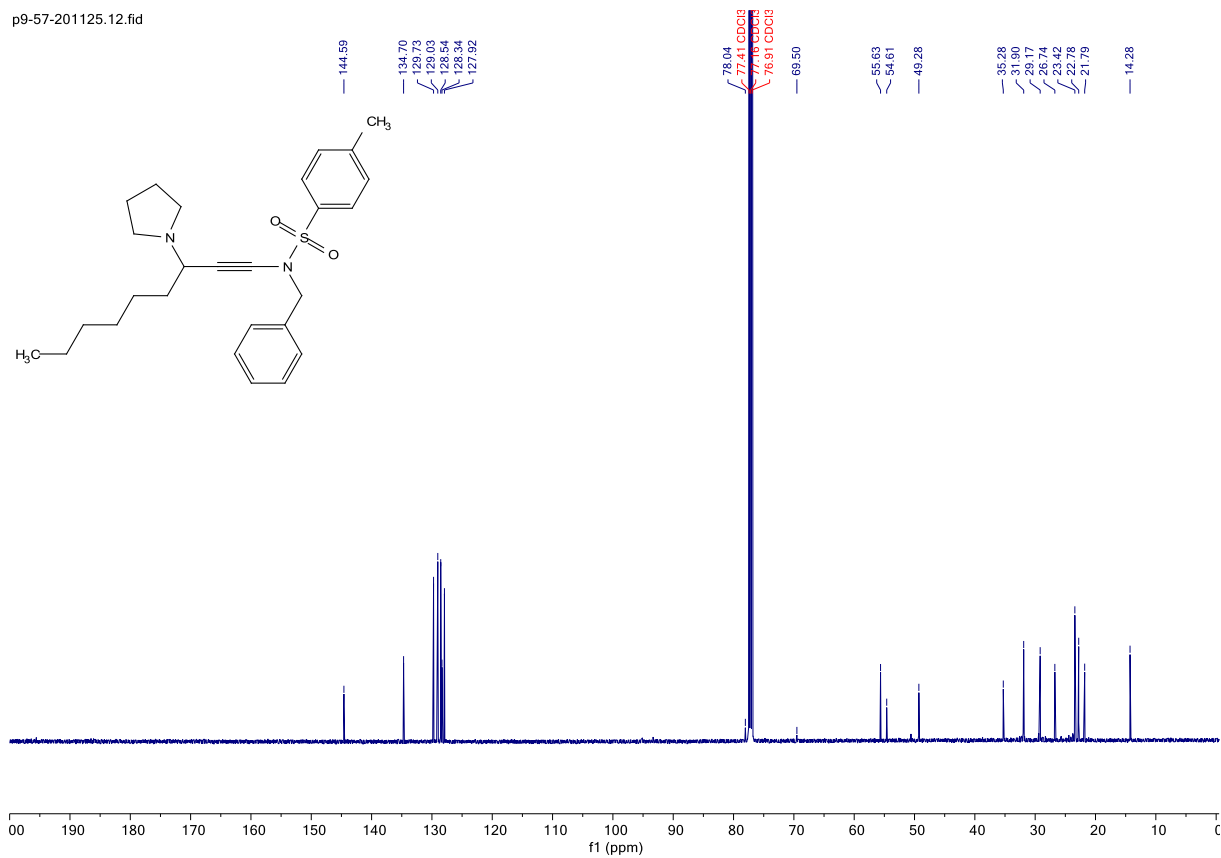

# DEPT135 NMR (126 MHz) in CDCl<sub>3</sub>

p9-57-201125.13.fid

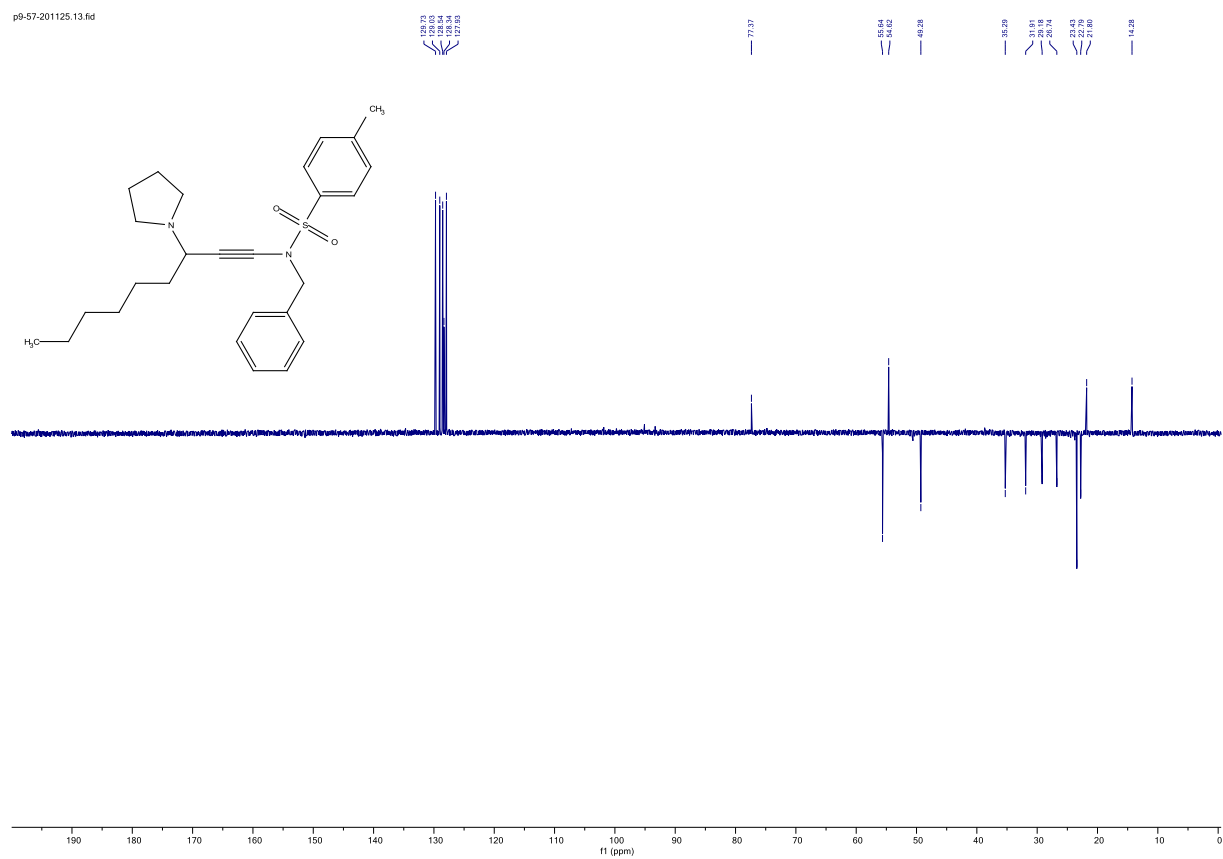

*N*-Benzyl-4-methyl-*N*-(4-methyl-3-(pyrrolidin-1-yl)pent-1-yn-1-yl)benzenesulfonamide

**(4j)**

<sup>1</sup>H NMR (500 MHz) in CDCl<sub>3</sub>

p9-65-201126.10.fid

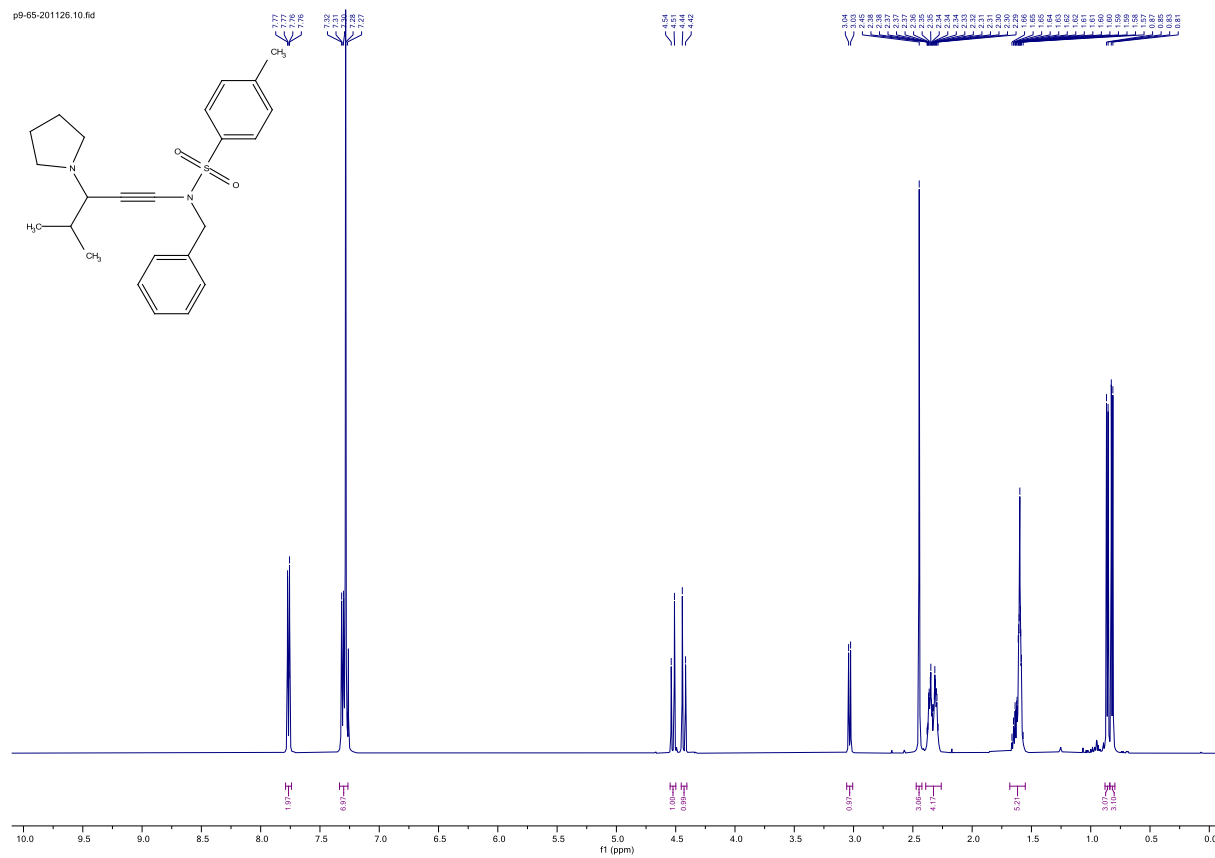



# <sup>13</sup>C NMR (126 MHz) in CDCl<sub>3</sub>

p9-65-201126.11.fid

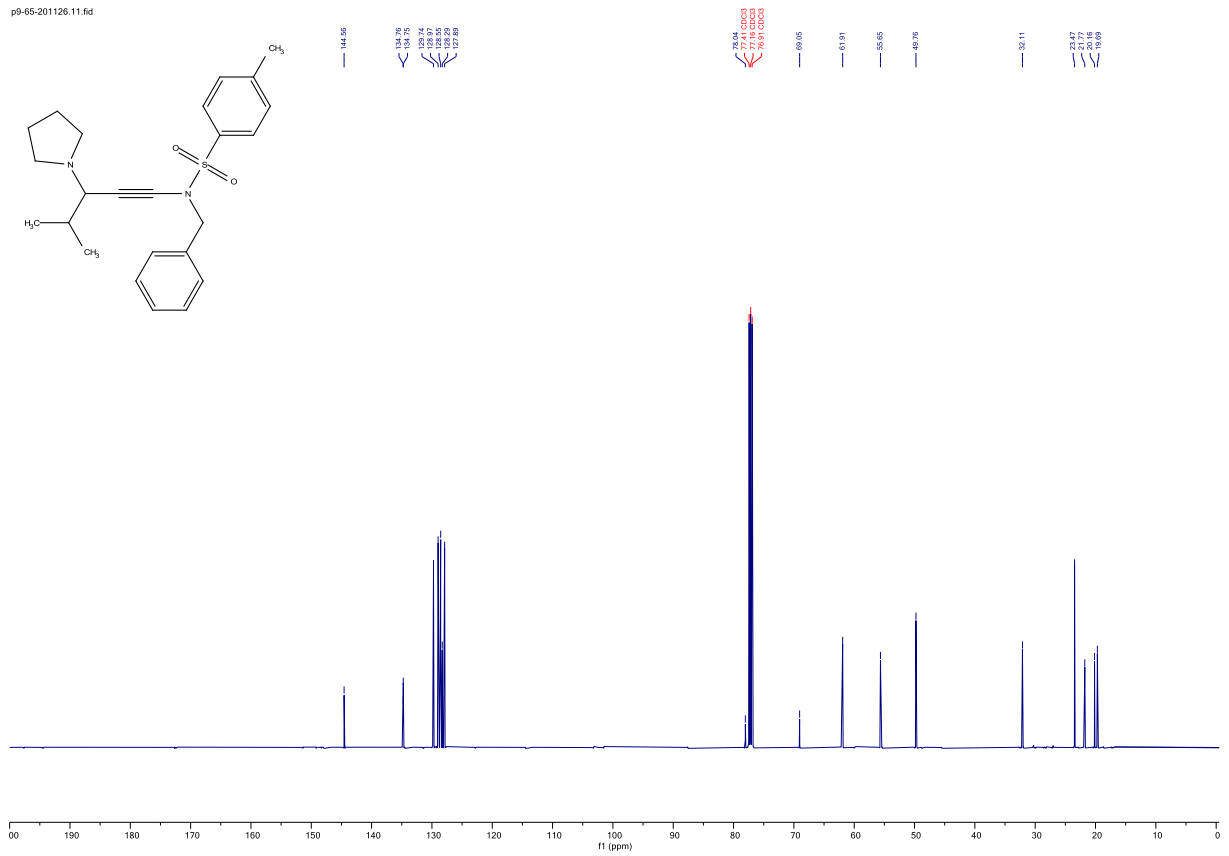

# DEPT135 NMR (126 MHz) in CDCl<sub>3</sub>

p9-65-201126.12.fid

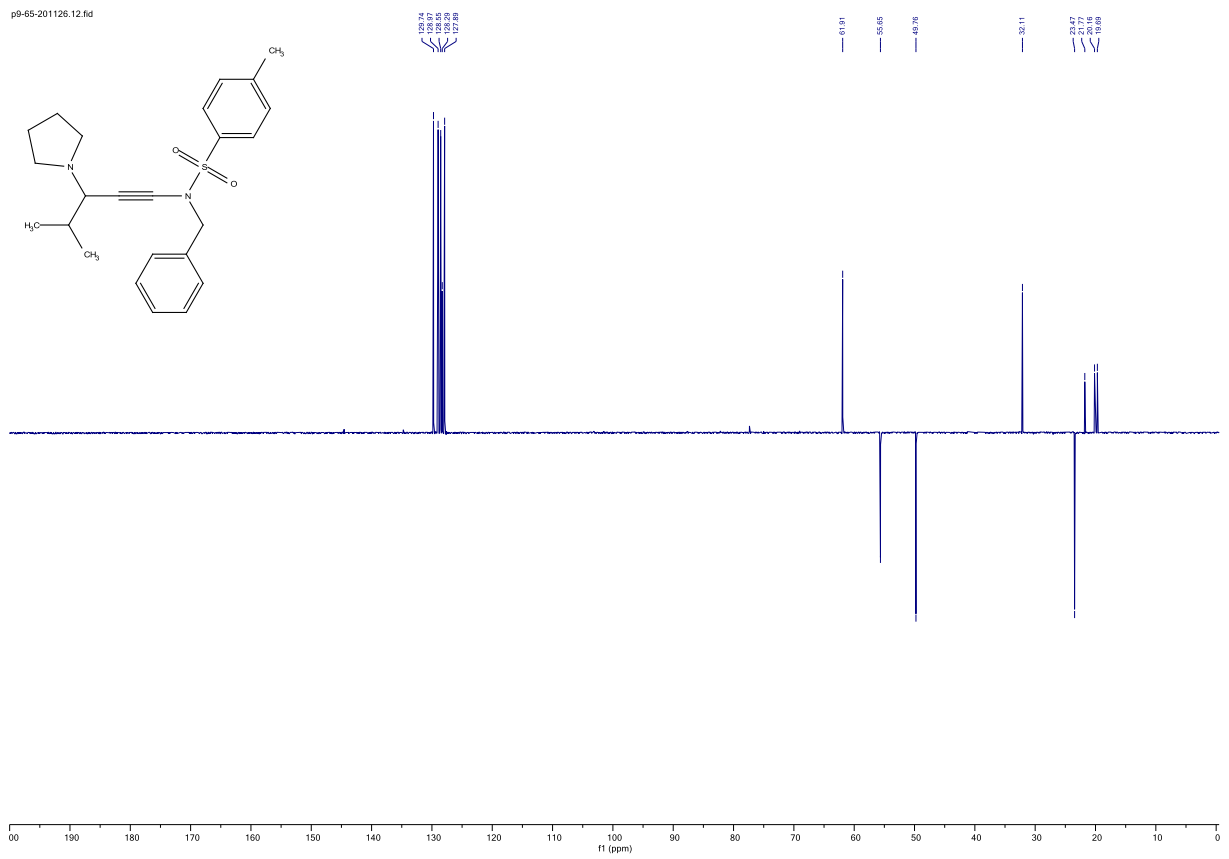

*N*-Benzyl-*N*-(4,4-dimethyl-3-(pyrrolidin-1-yl)pent-1-yn-1-yl)-4-methylbenzenesulfonamide (**4k**)

<sup>1</sup>H NMR (500 MHz) in CDCl<sub>3</sub>

p9-8-201124.10.fcd

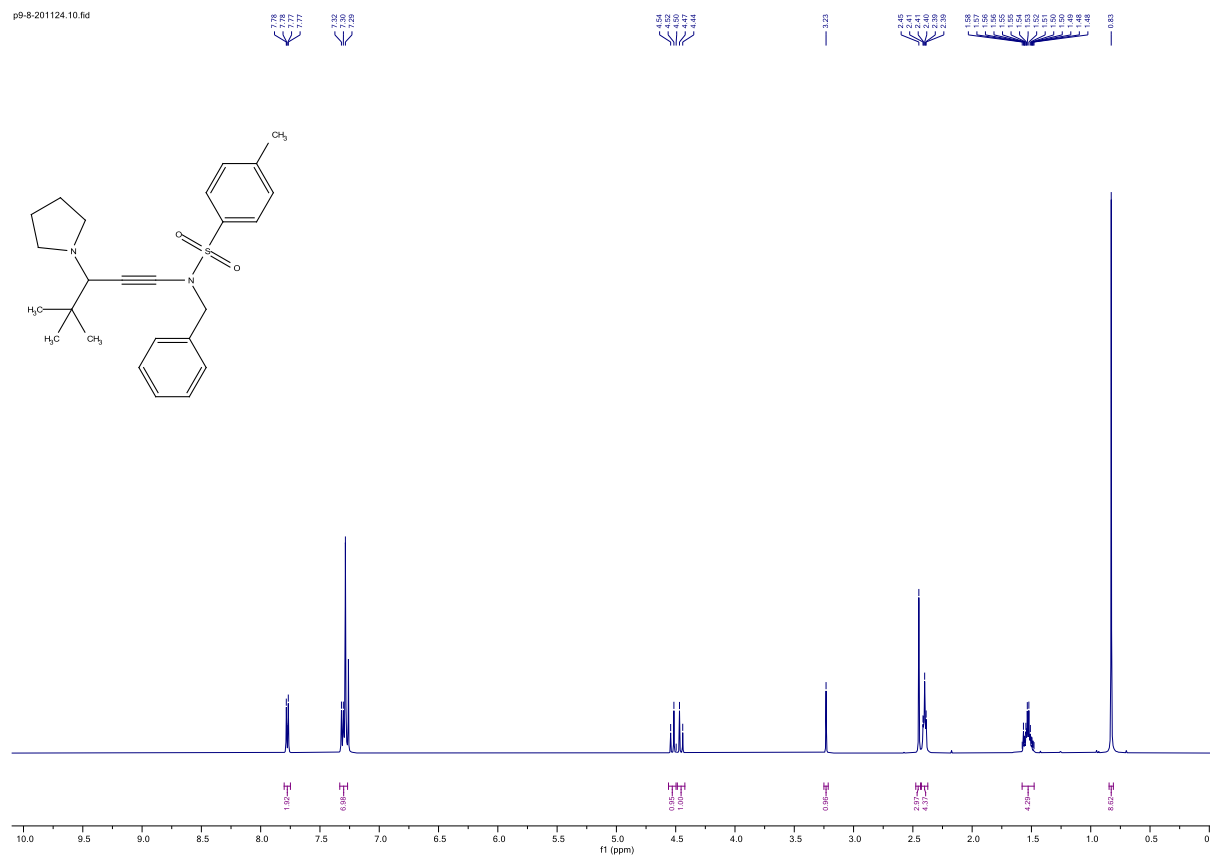

# <sup>13</sup>C NMR (126 MHz) in CDCl<sub>3</sub>

p9-8-201124.11.fid

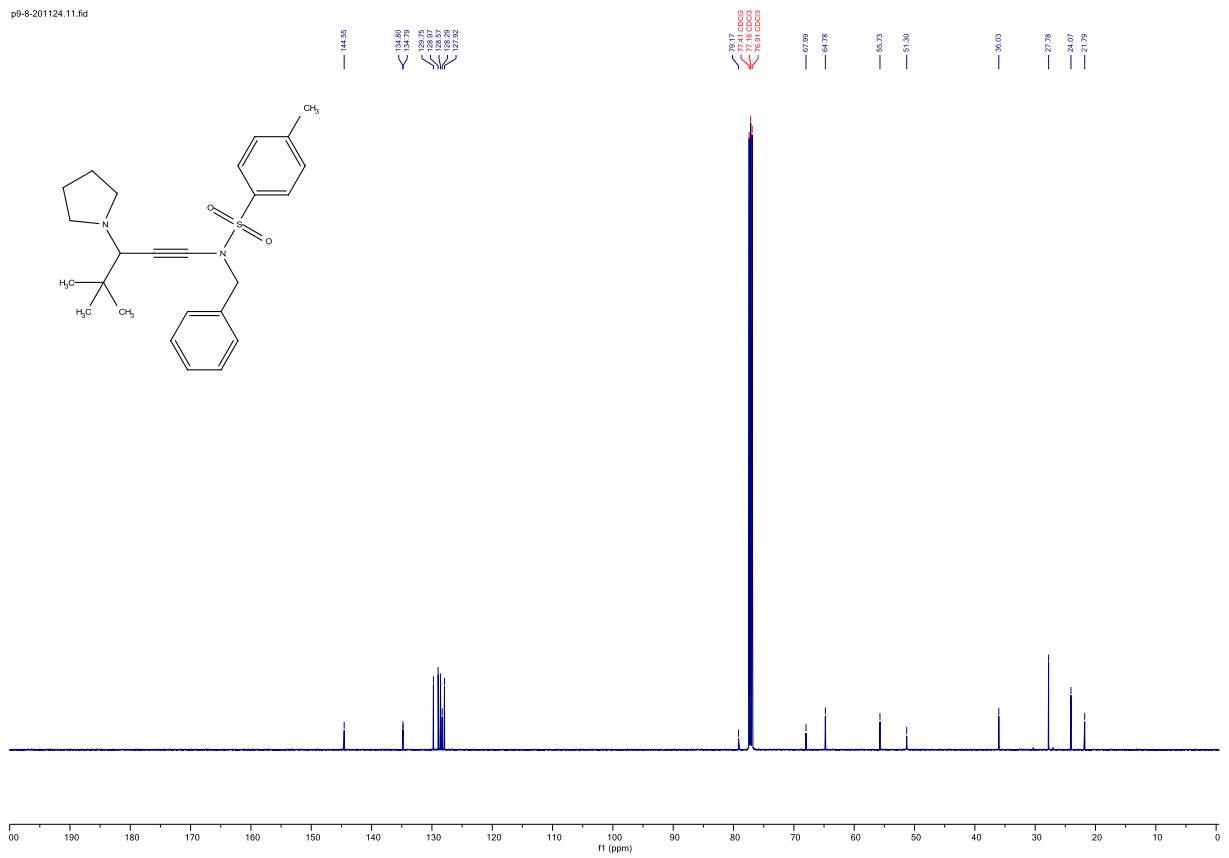

# DEPT135 NMR (126 MHz) in CDCl<sub>3</sub>

p9-8-201124.12.fid

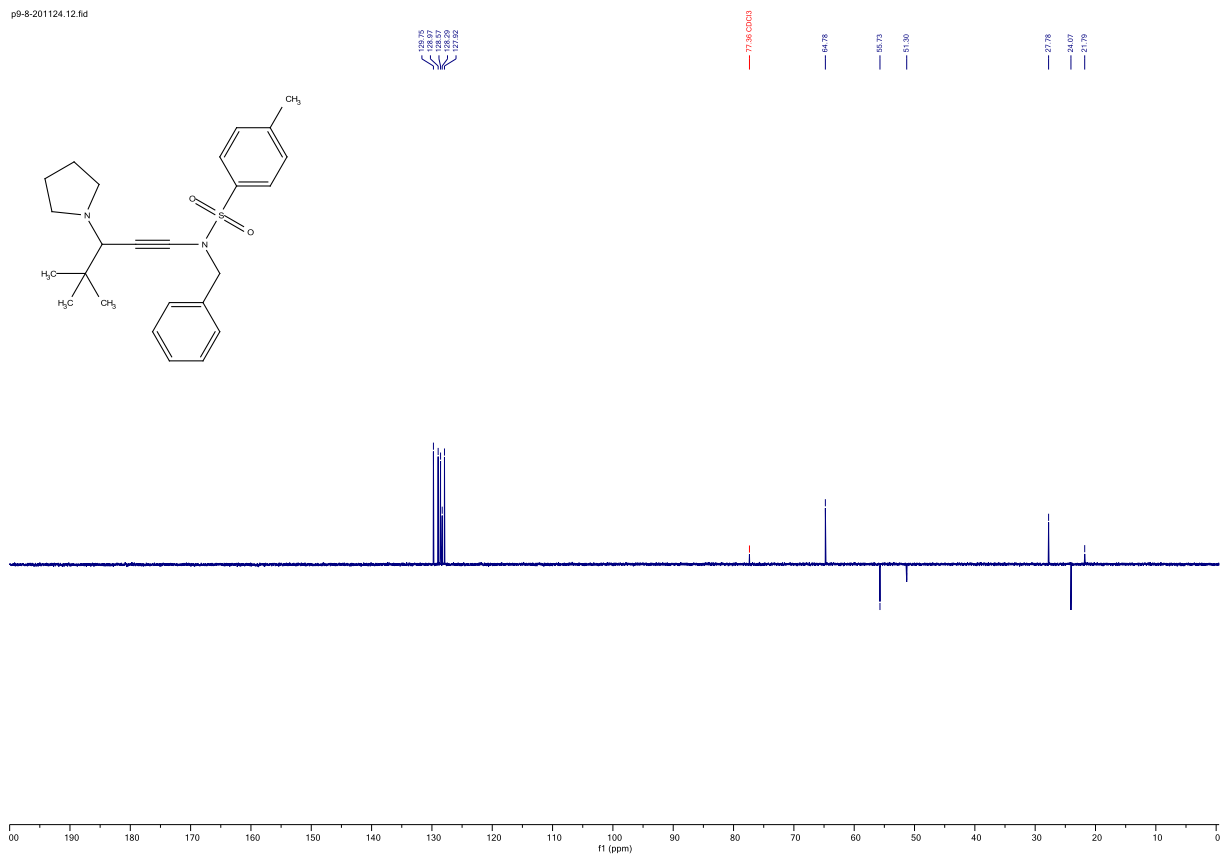

*N*-Benzyl-*N*-(3-((*S*)-2,2-dimethyl-1,3-dioxolan-4-yl)-3-(pyrrolidin-1-yl)prop-1-yn-1-yl)-4-methylbenzenesulfonamide (4I)

<sup>1</sup>H NMR (500 MHz) in CDCl<sub>3</sub>

p9-23-210211.10.fid

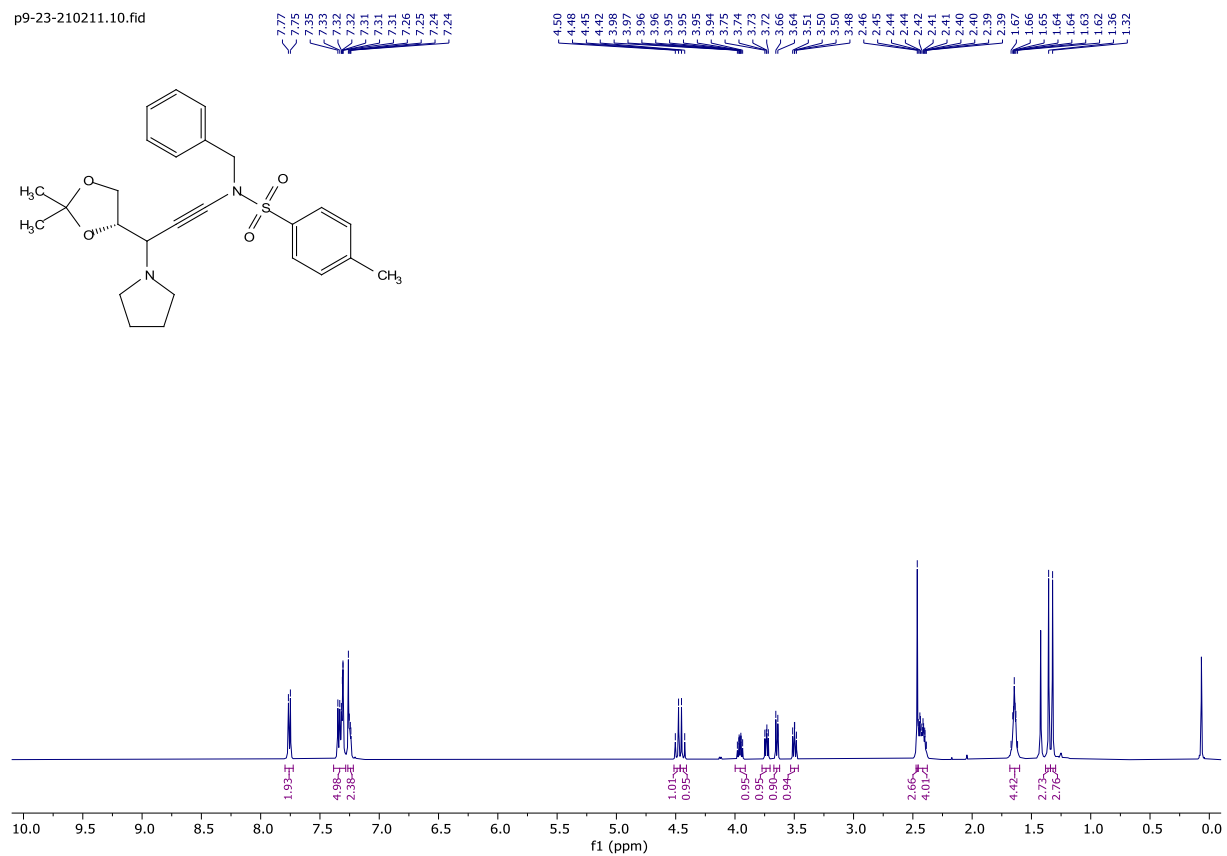

# <sup>13</sup>C NMR (126 MHz) in CDCl<sub>3</sub>

p9-87-210406.11.fid

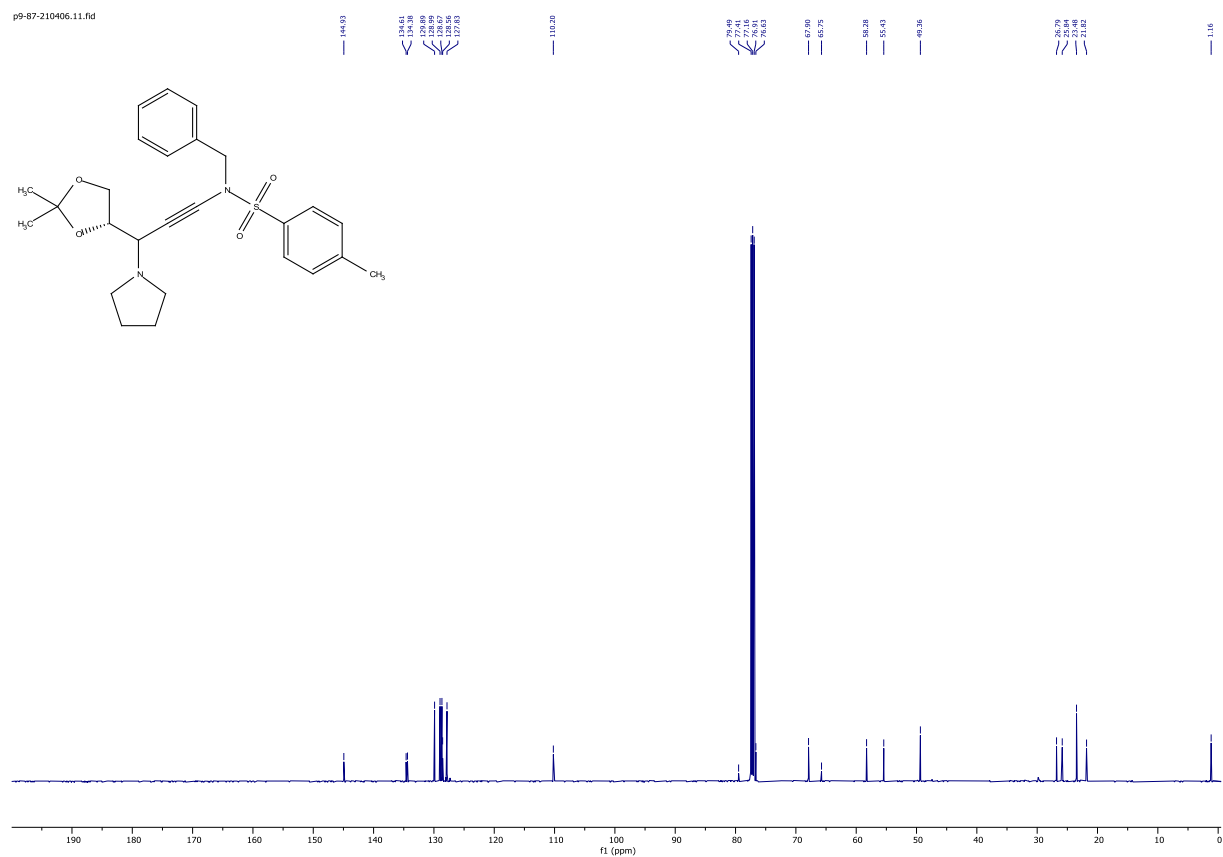

# DEPT135 NMR (126 MHz) in CDCl<sub>3</sub>

p9-87-210406.12.fid

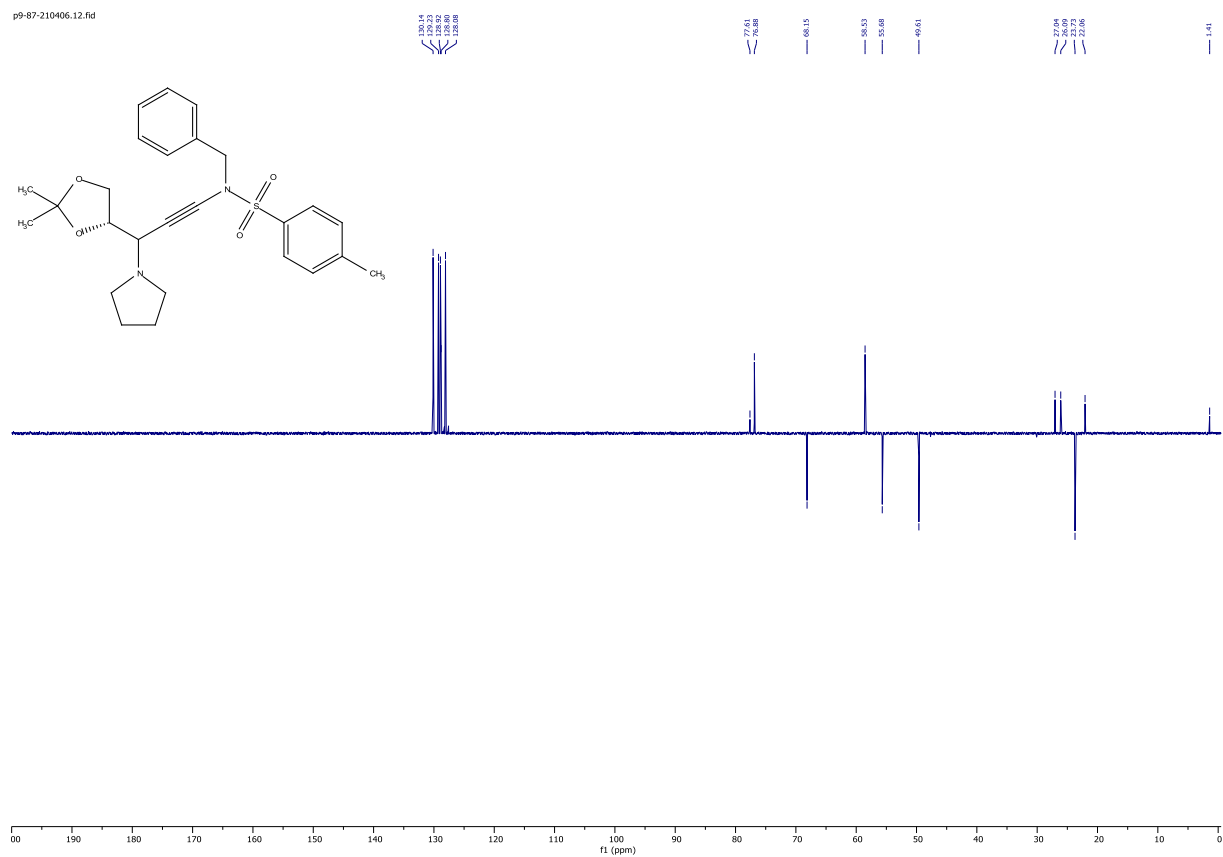



# <sup>13</sup>C NMR (126 MHz) in CDCl<sub>3</sub>

p8-111-201118.11.fid

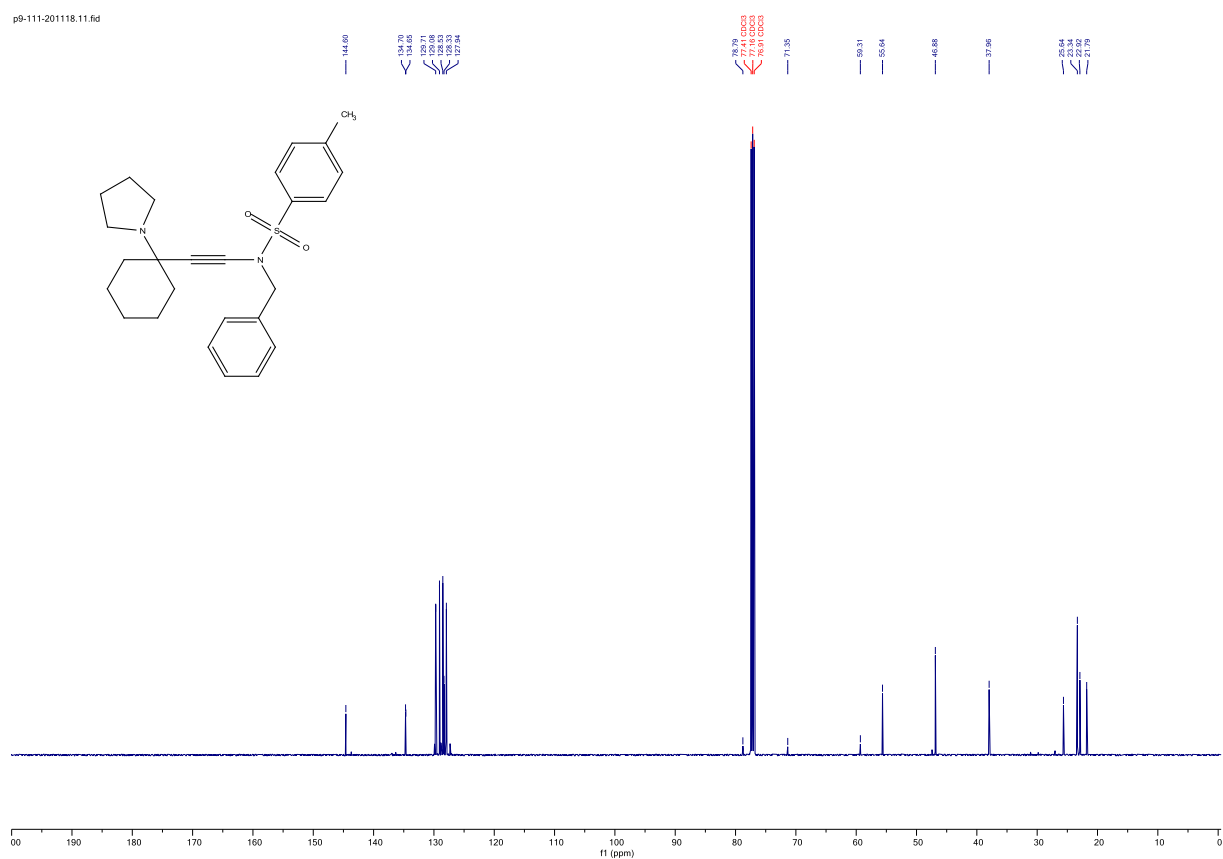

# DEPT135 NMR (126 MHz) in CDCl<sub>3</sub>

p8-111-201118.12.fid

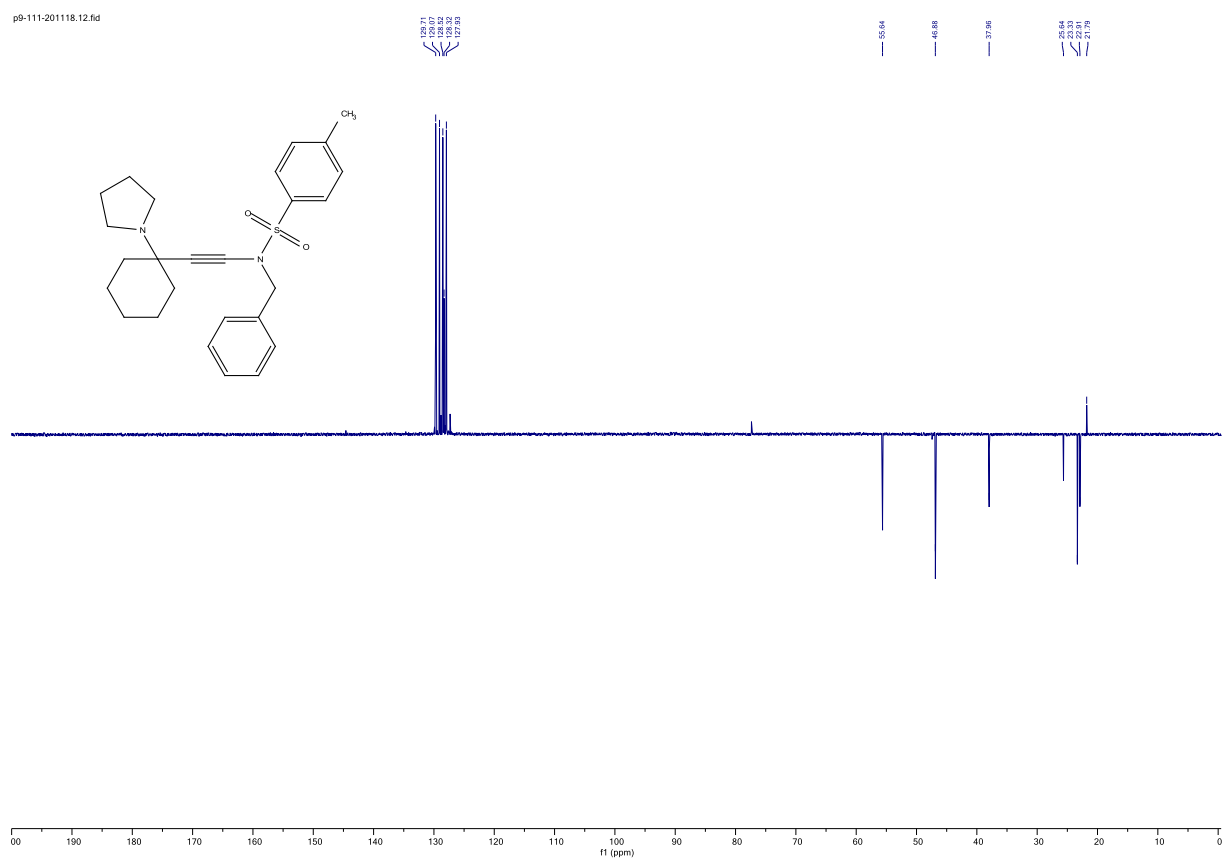

*N*-Benzyl-4-methyl-*N*-((1-(pyrrolidin-1-yl)cyclopentyl)ethynyl)benzenesulfonamide

**(4n)**

<sup>1</sup>H NMR (500 MHz) in CDCl<sub>3</sub>

p9-47-201120.10.fid

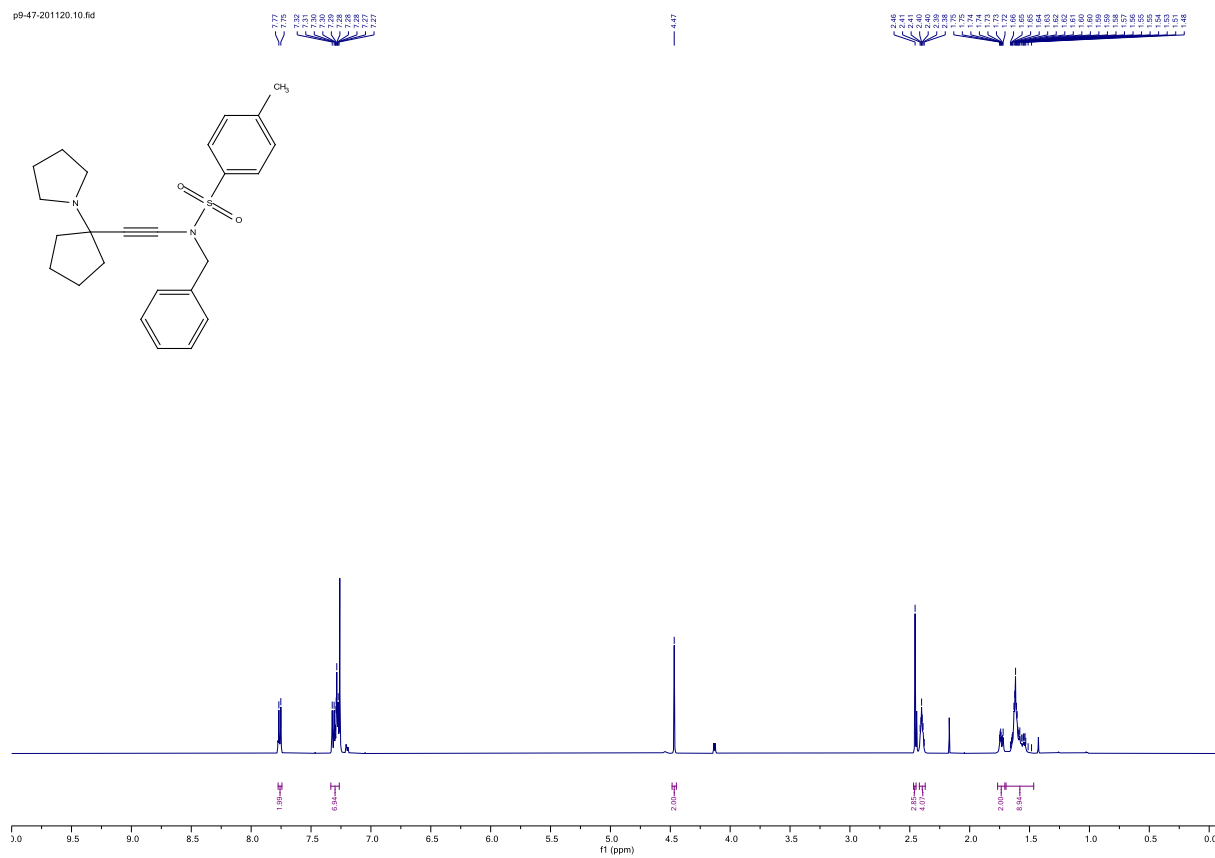



### <sup>13</sup>C NMR (126 MHz) in CDCl<sub>3</sub>

p9-47-201120.11.fid

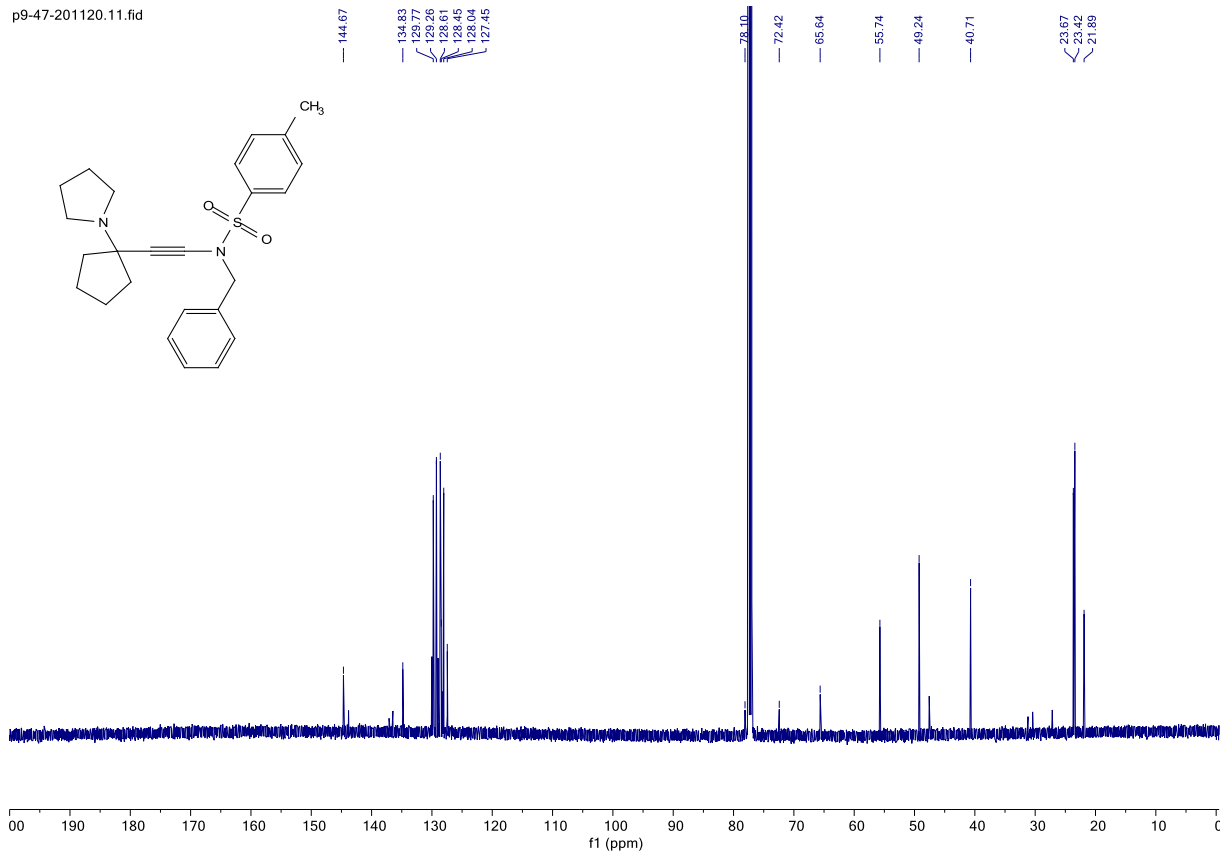

### DEPT135 NMR (126 MHz) in CDCl<sub>3</sub>

p9-47-201120.12.fid

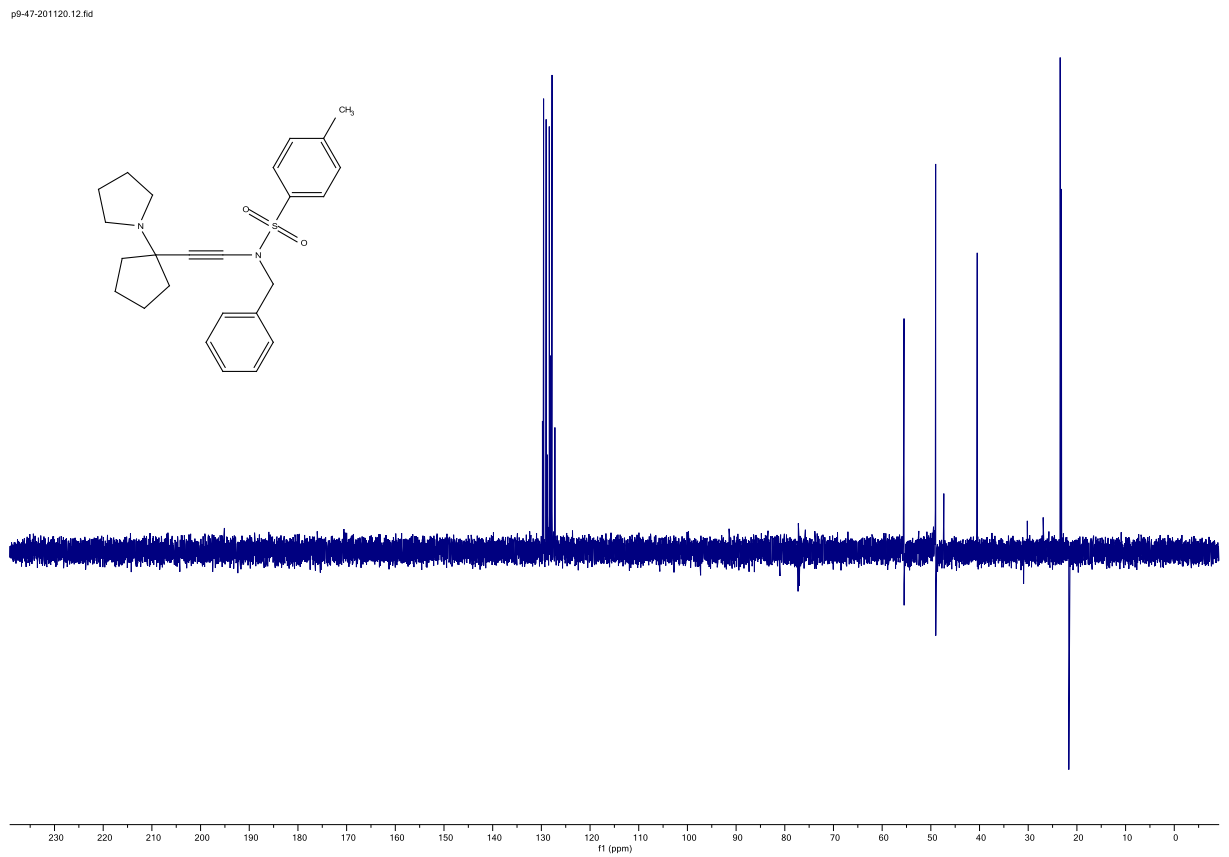



# <sup>13</sup>C NMR (126 MHz) in CDCl<sub>3</sub>

p9-48-201120.11.fid

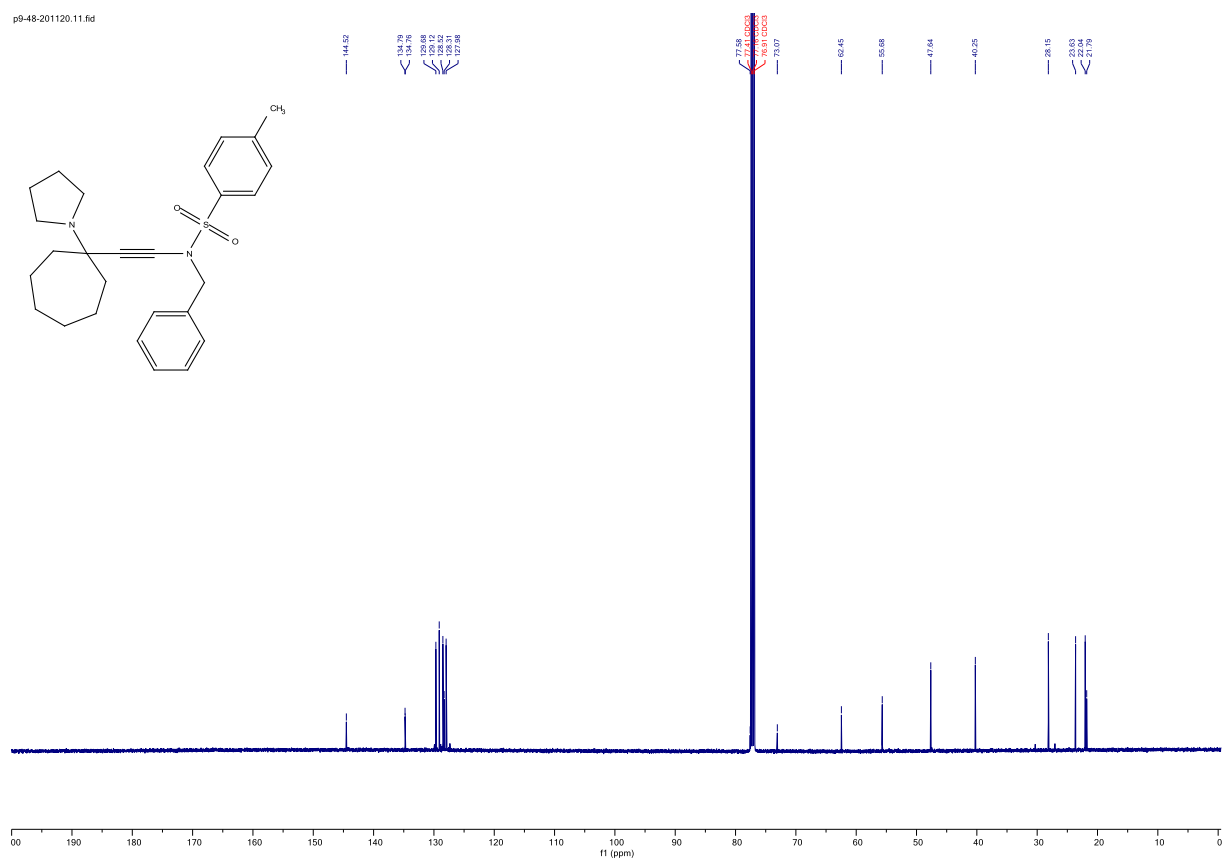

# DEPT135 NMR (126 MHz) in CDCl<sub>3</sub>

p9-48-201120.12.fid

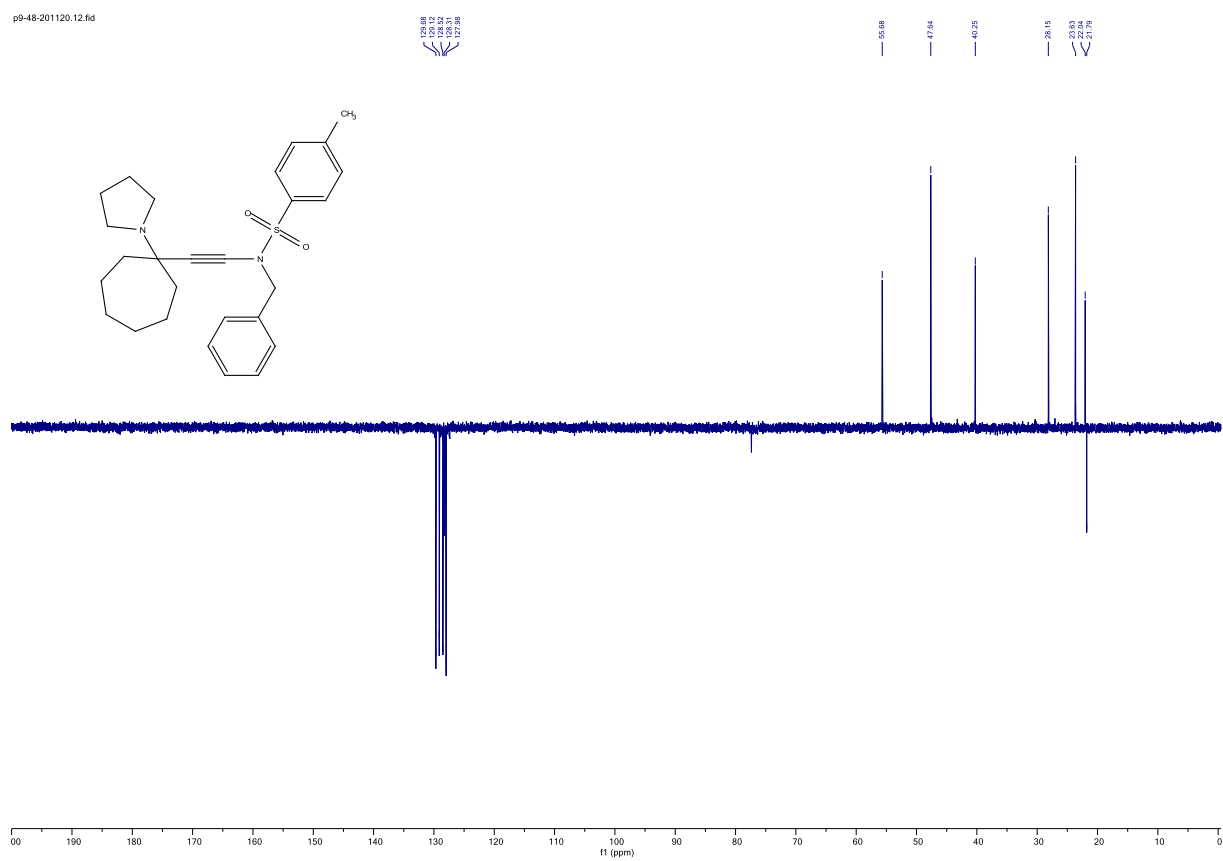

*N*-Benzyl-4-methyl-*N*-((2-methyl-1-(pyrrolidin-1-yl)cyclohexyl)ethynyl)benzenesulfonamide (**4p**)

<sup>1</sup>H NMR (500 MHz) in CDCl<sub>3</sub>

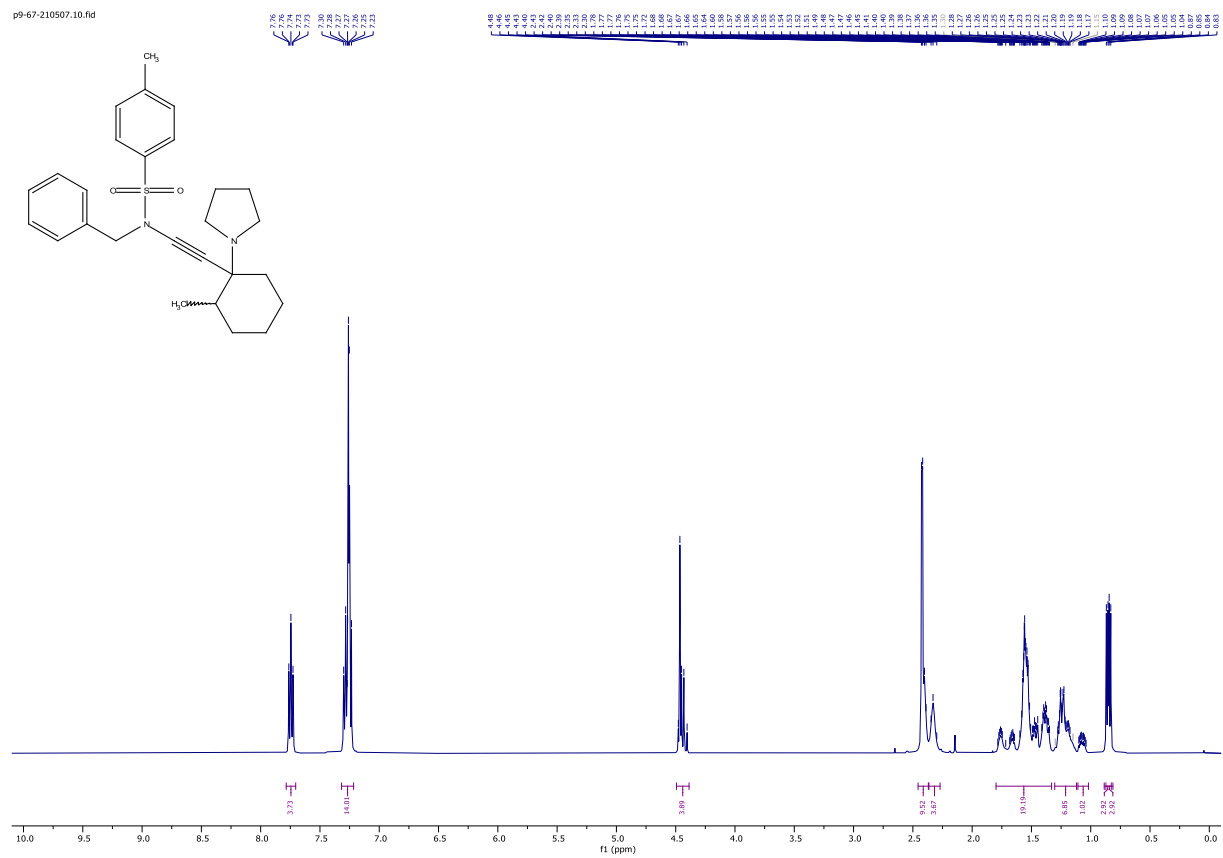

# <sup>13</sup>C NMR (126 MHz) in CDCl<sub>3</sub>

p9-67-210507.11.fid

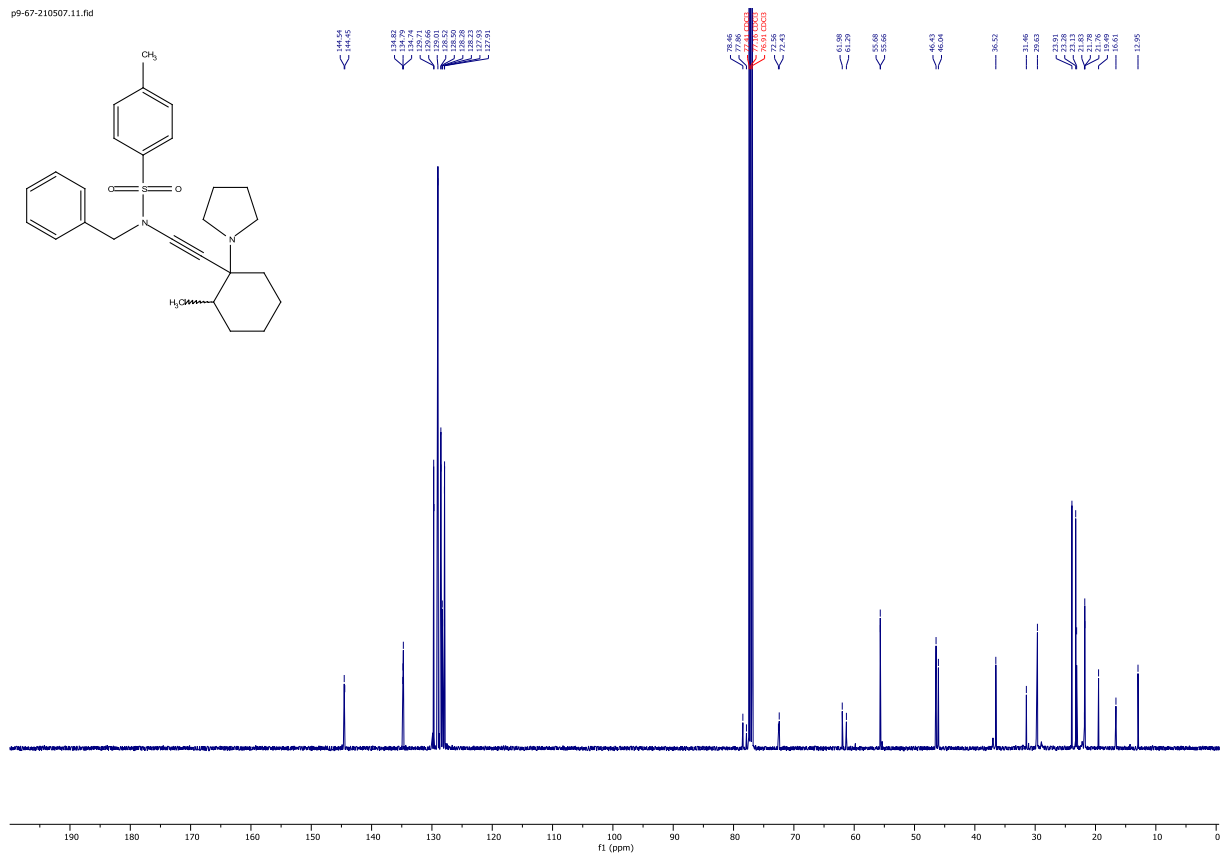

# DEPT135 NMR (126 MHz) in CDCl<sub>3</sub>

p9-67-210507.12.fid

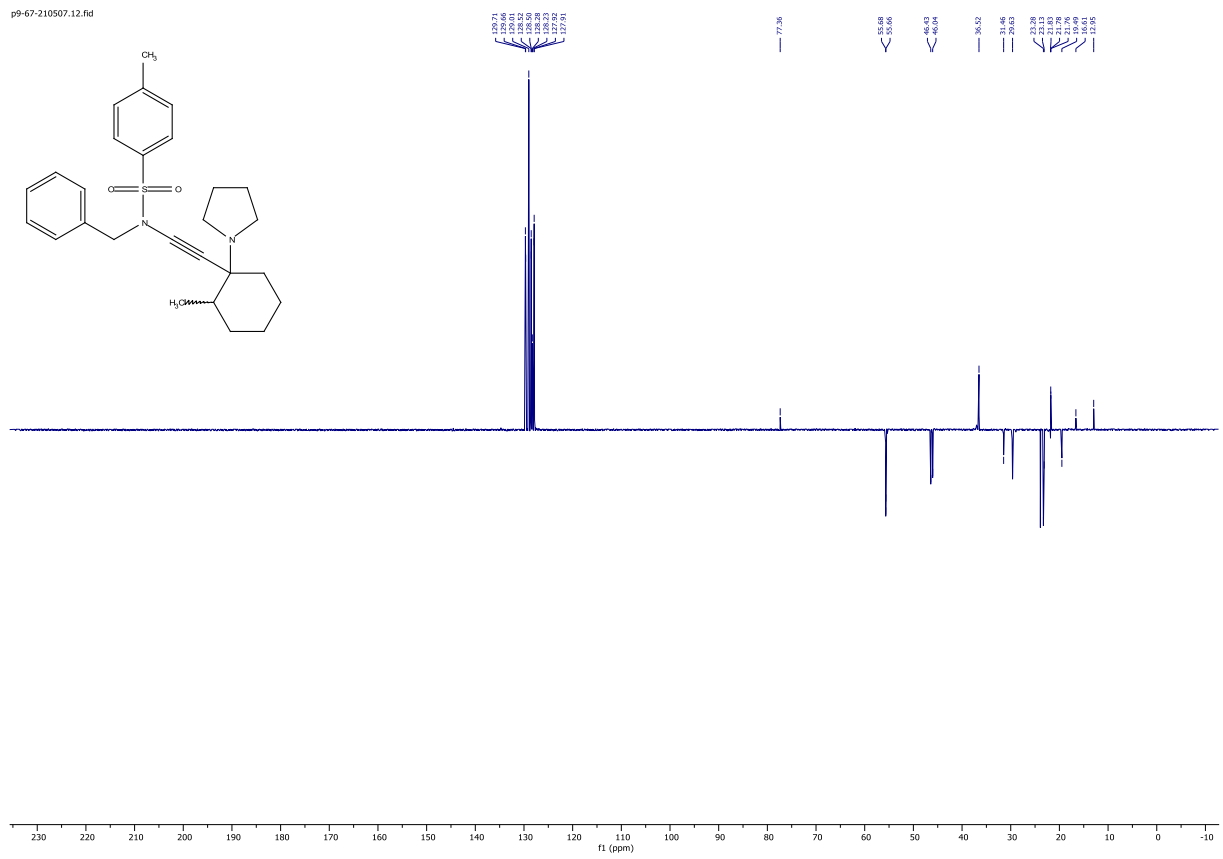

*N*-Benzyl-4-methyl-*N*-(3-methyl-3-(pyrrolidin-1-yl)hept-1-yn-1-yl)benzenesulfonamide

**(4r)**

<sup>1</sup>H NMR (500 MHz) in CDCl<sub>3</sub>

p9-83-201130.10.fid

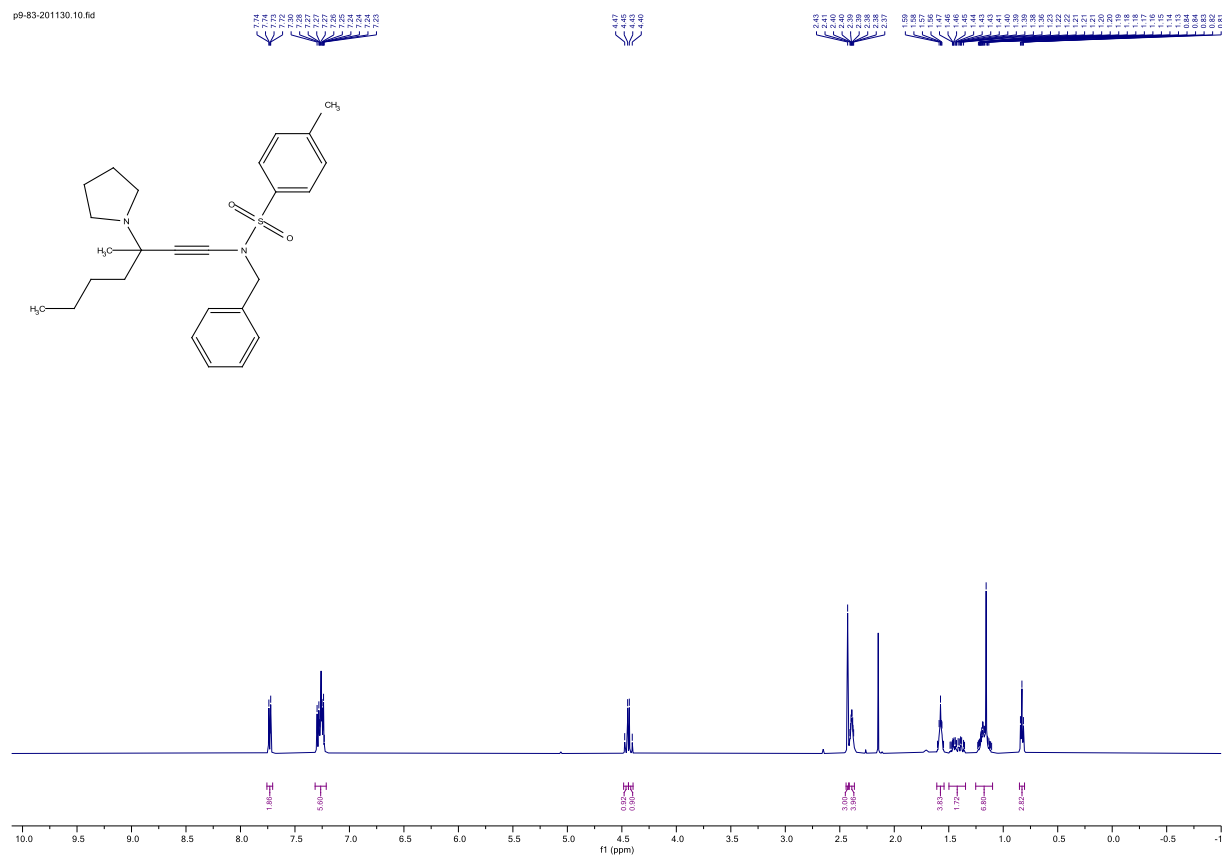

# <sup>13</sup>C NMR (126 MHz) in CDCl<sub>3</sub>

p9-83-201130.11.fid

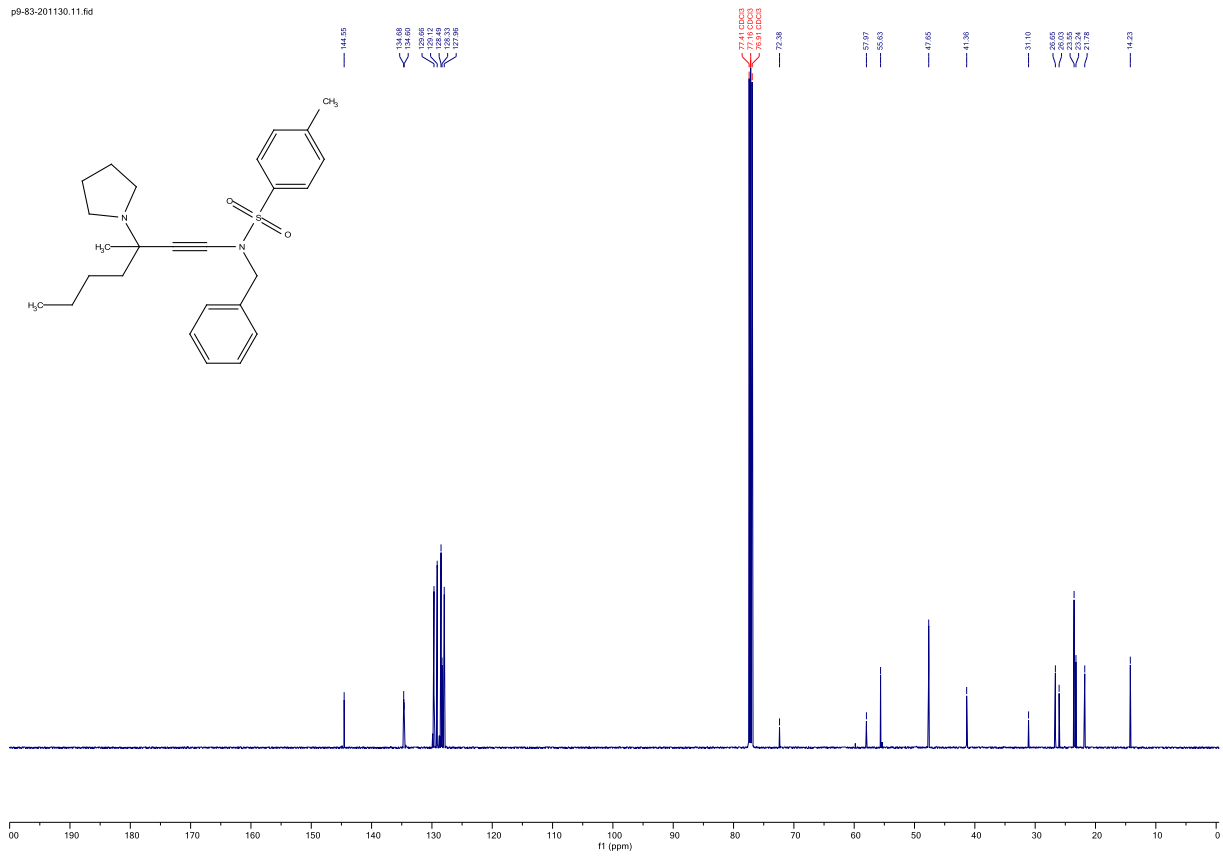

# DEPT135 NMR (126 MHz) in CDCl<sub>3</sub>

p9-83-201130.12.fid

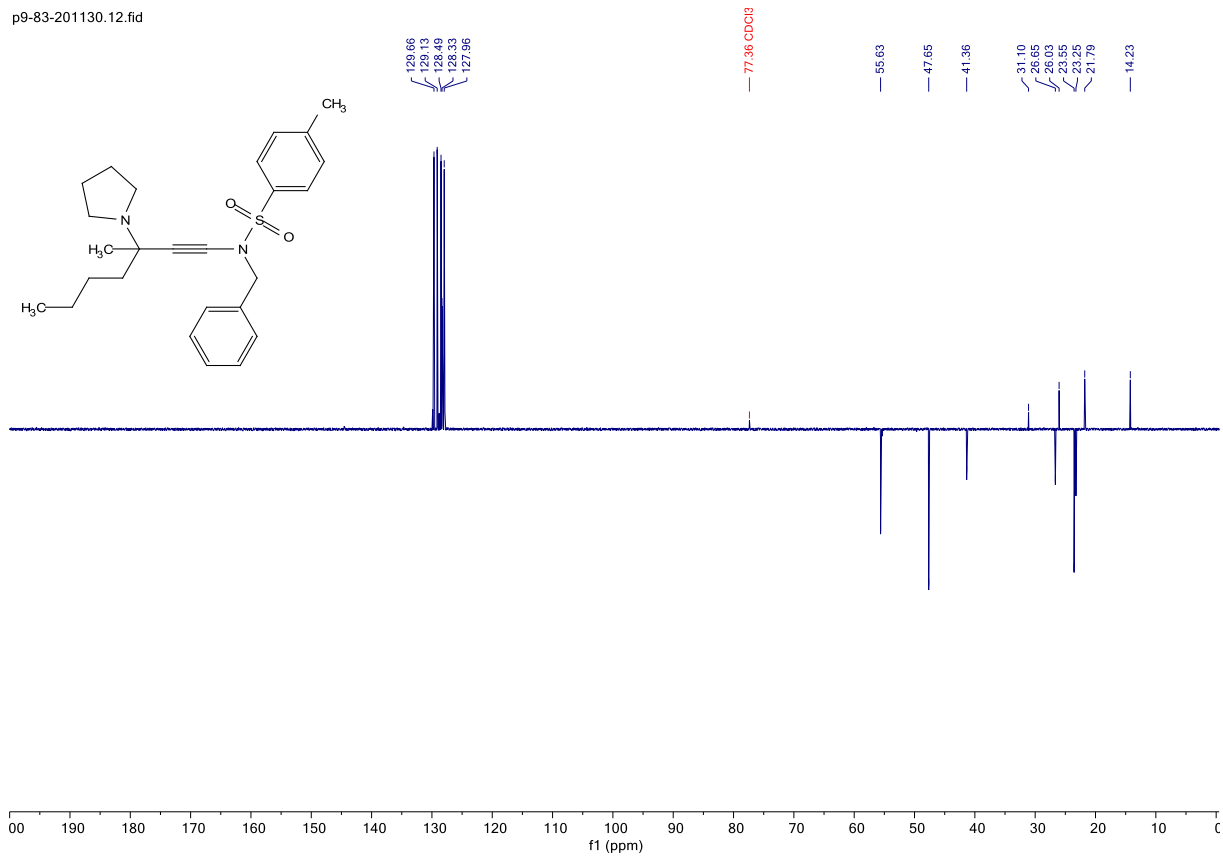

*N*-Benzyl-4-methyl-*N*-(3-phenyl-3-(piperidin-1-yl)prop-1-yn-1-yl)benzenesulfonamide

**(5a)**

<sup>1</sup>H NMR (300 MHz) in CDCl<sub>3</sub>

p9-46-201119.10.fid

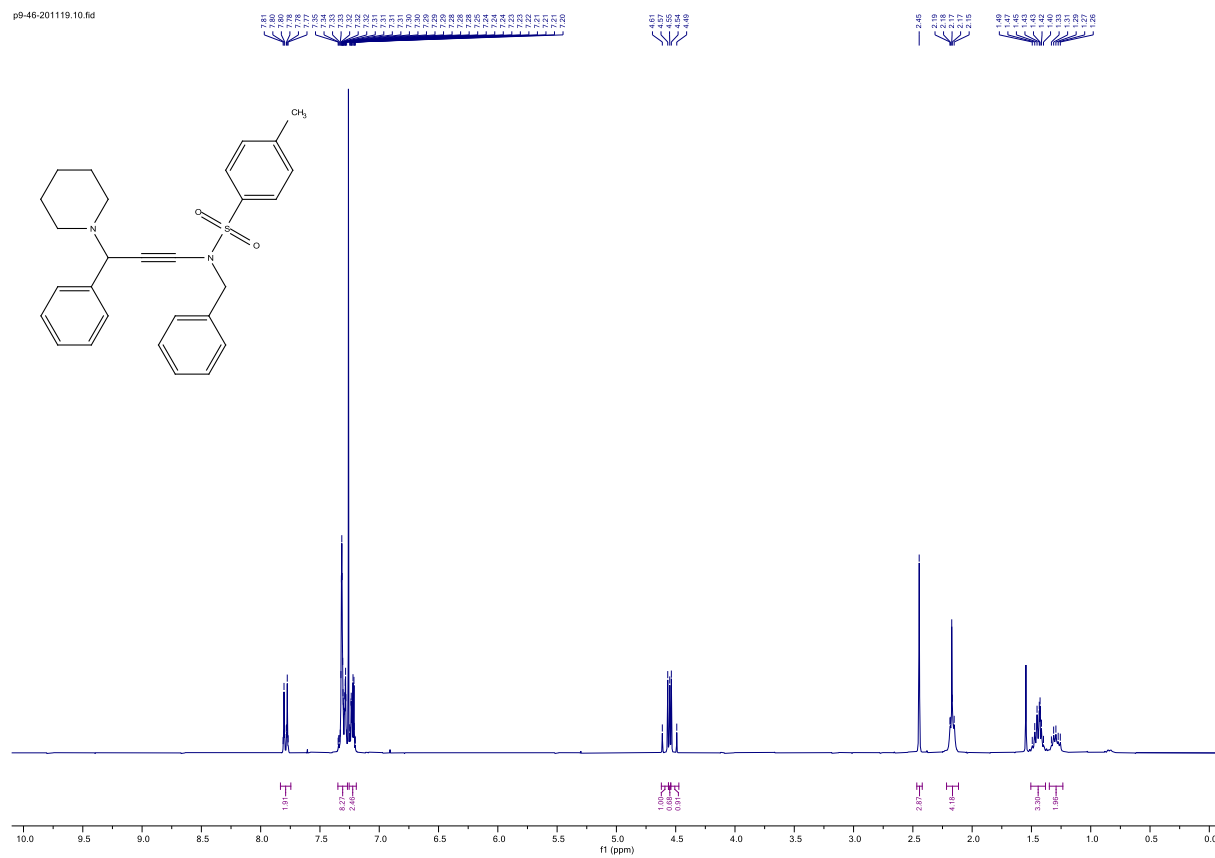





# *N*-Benzyl-4-methyl-*N*-(3-morpholino-3-phenylprop-1-yn-1-yl)benzenesulfonamide (**5b**)

## <sup>1</sup>H NMR (300 MHz) in CDCl<sub>3</sub>

p9-54-201015.10.fid

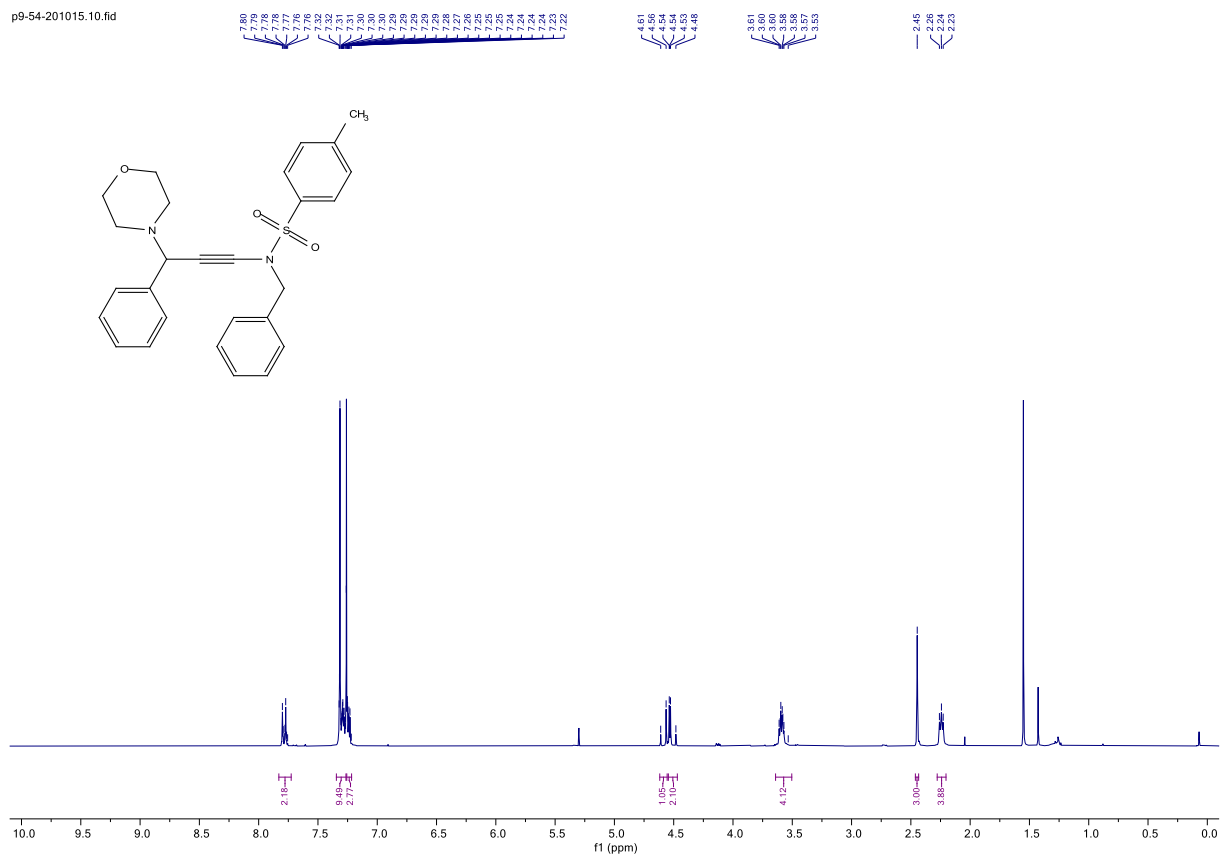

## <sup>13</sup>C NMR (126 MHz) in CDCl<sub>3</sub>

p9-99-201016.11.fid

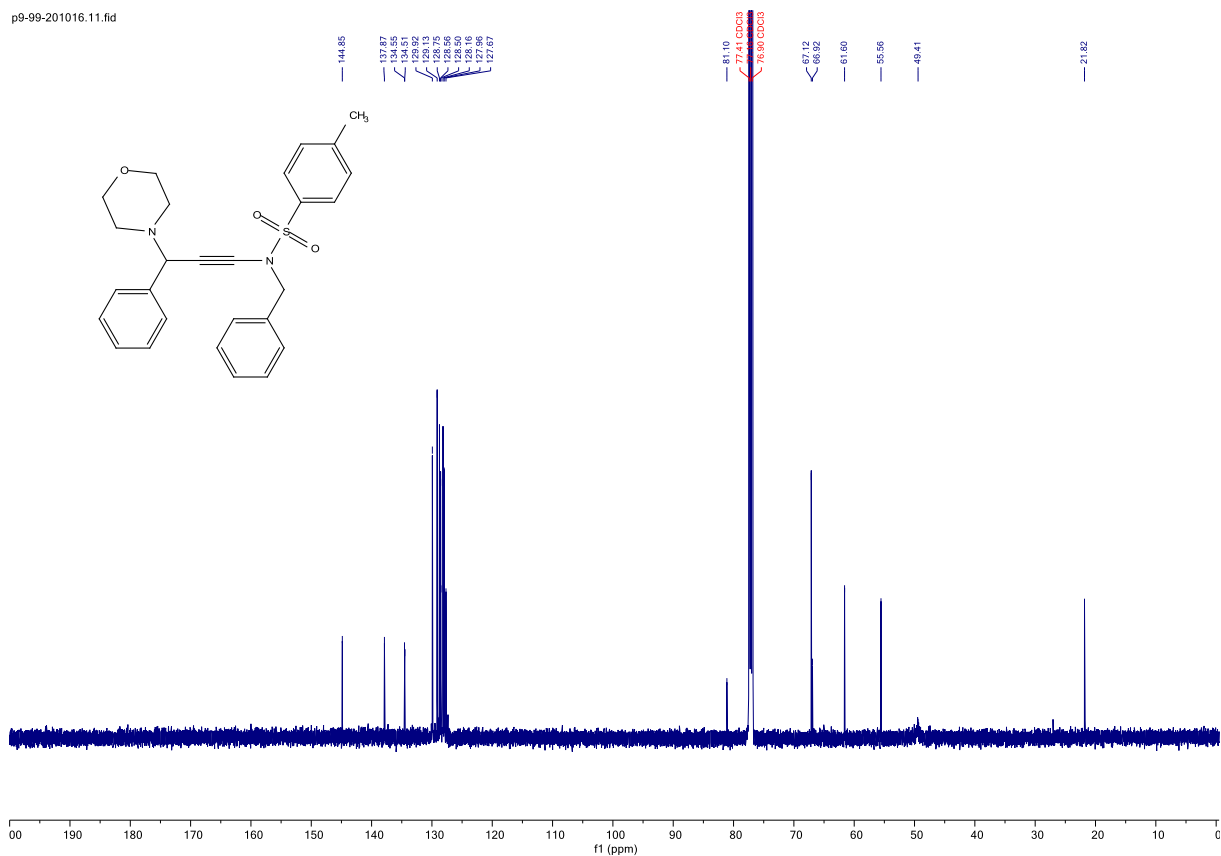

# DEPT135 NMR (126 MHz) in CDCl<sub>3</sub>

p9-99-201016.12.fid

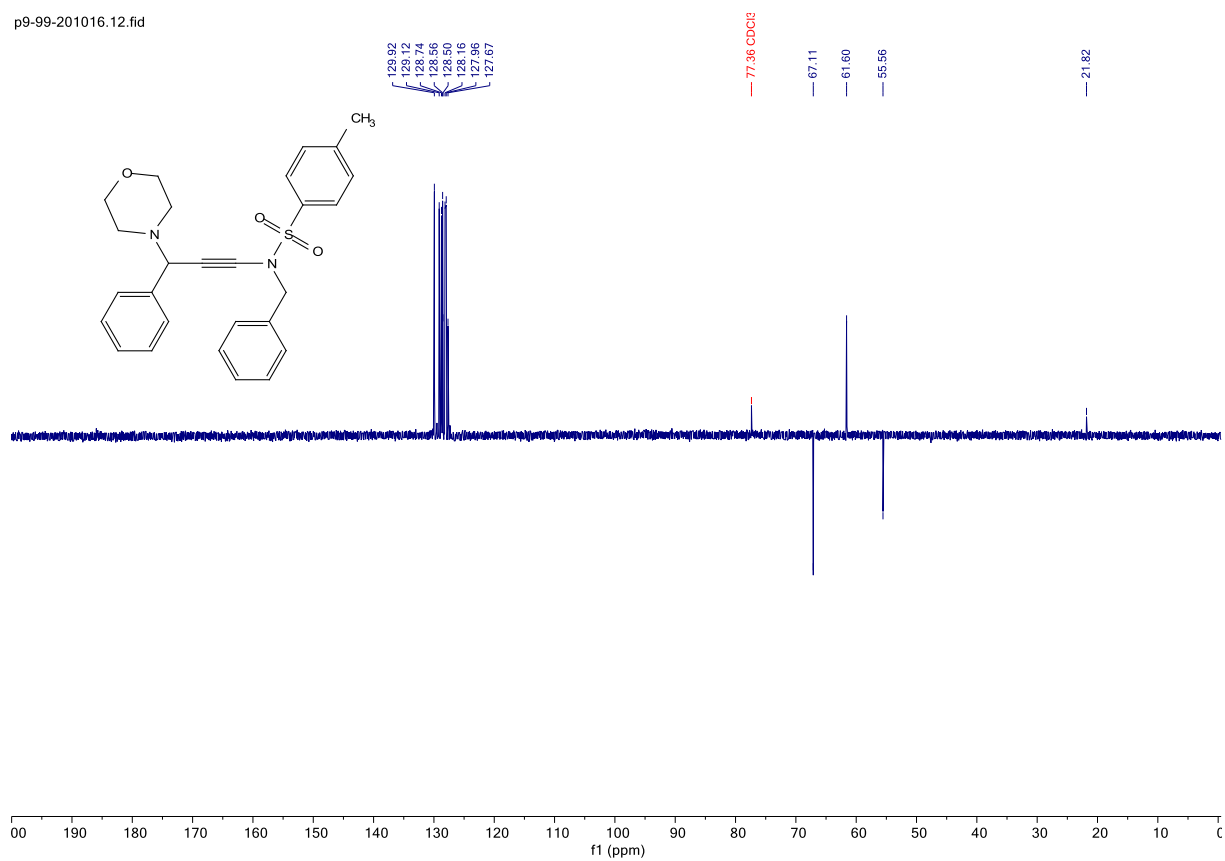

*N*-Benzyl-*N*-(3-(3,4-dihydroisoquinolin-2(1*H*)-yl)-3-phenylprop-1-yn-1-yl)-4-methylbenzenesulfonamide (**5c**)

<sup>1</sup>H NMR (500 MHz) in CDCl<sub>3</sub>

p9-66-210115.10.fid

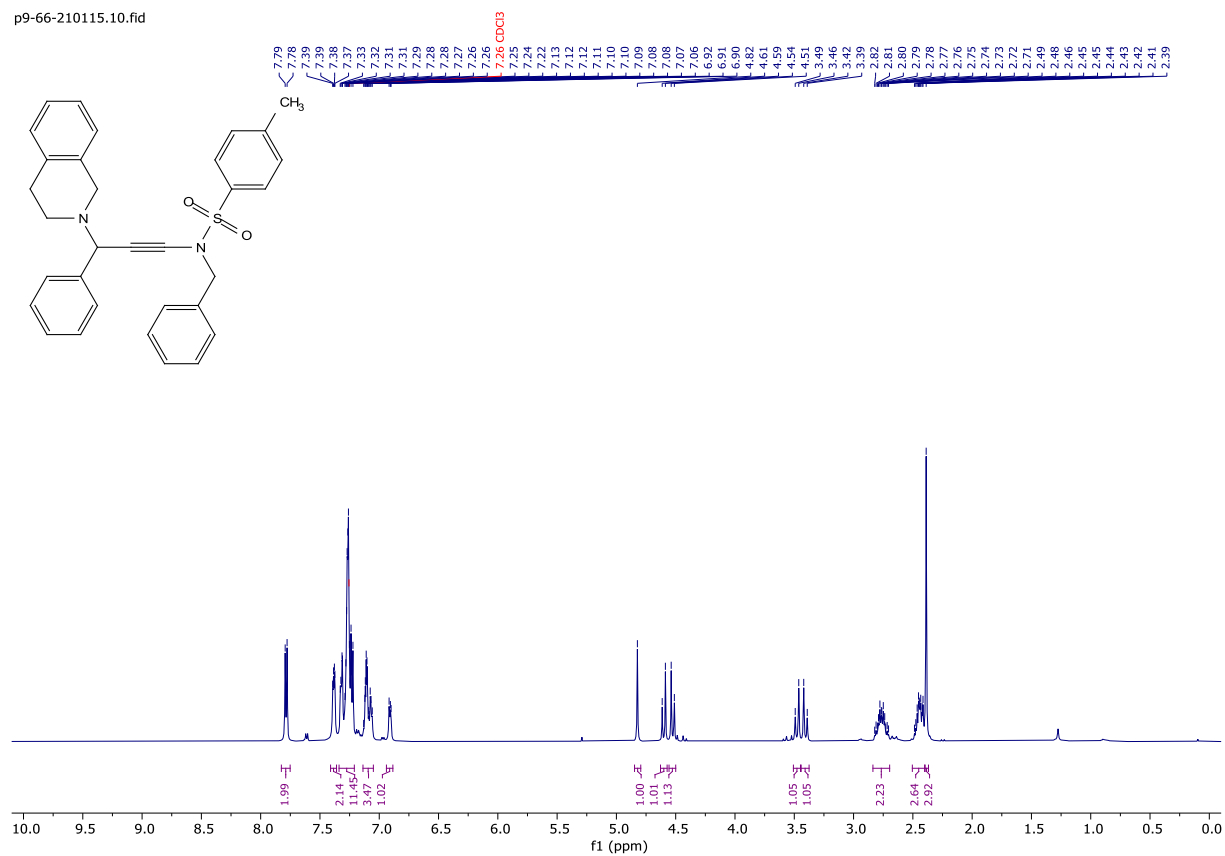

### <sup>13</sup>C NMR (126 MHz) in CDCl<sub>3</sub>

p9-66-210115.11.fid

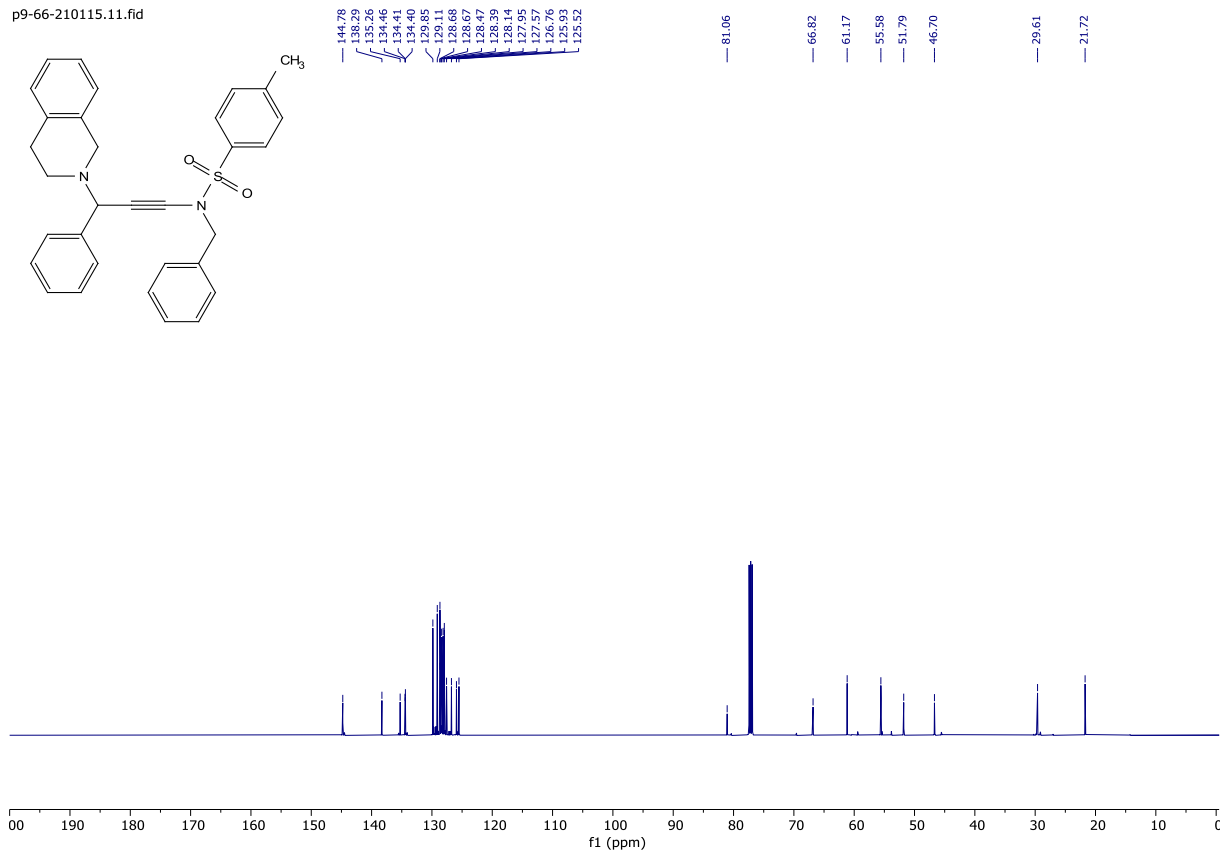

### DEPT135 NMR (126 MHz) in CDCl<sub>3</sub>

p9-66-210115.12.fid

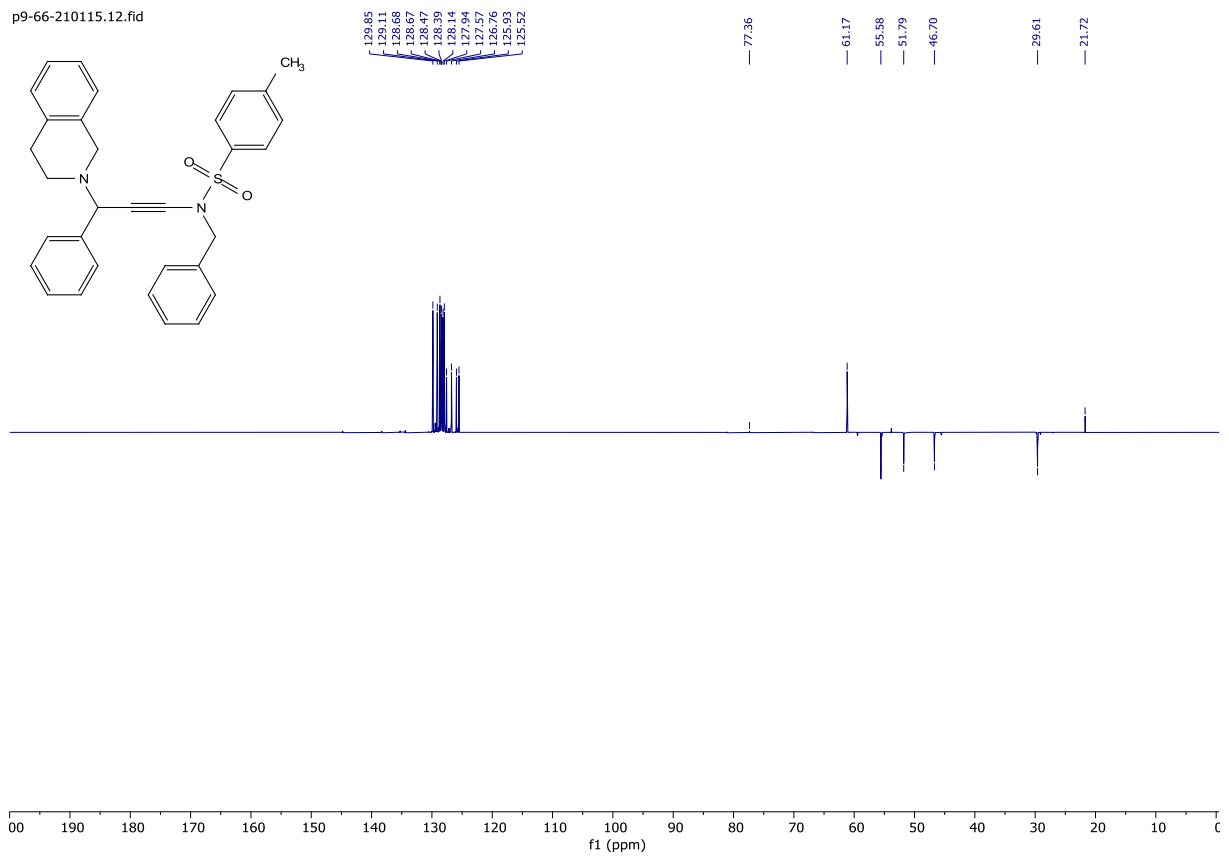



# <sup>13</sup>C NMR (126 MHz) in CDCl<sub>3</sub>

p9-9-201124.11.fid

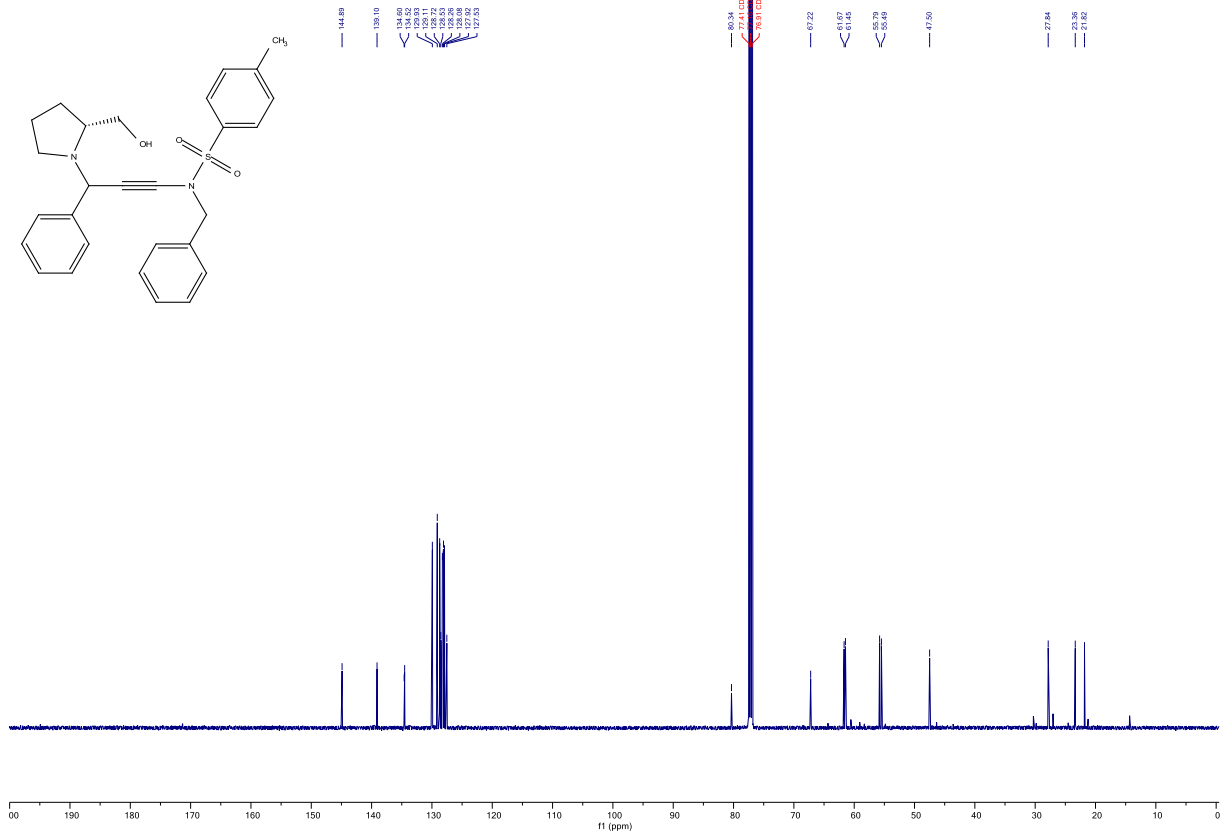

# DEPT135 NMR (126 MHz) in CDCl<sub>3</sub>

p9-9-201124.12.fid

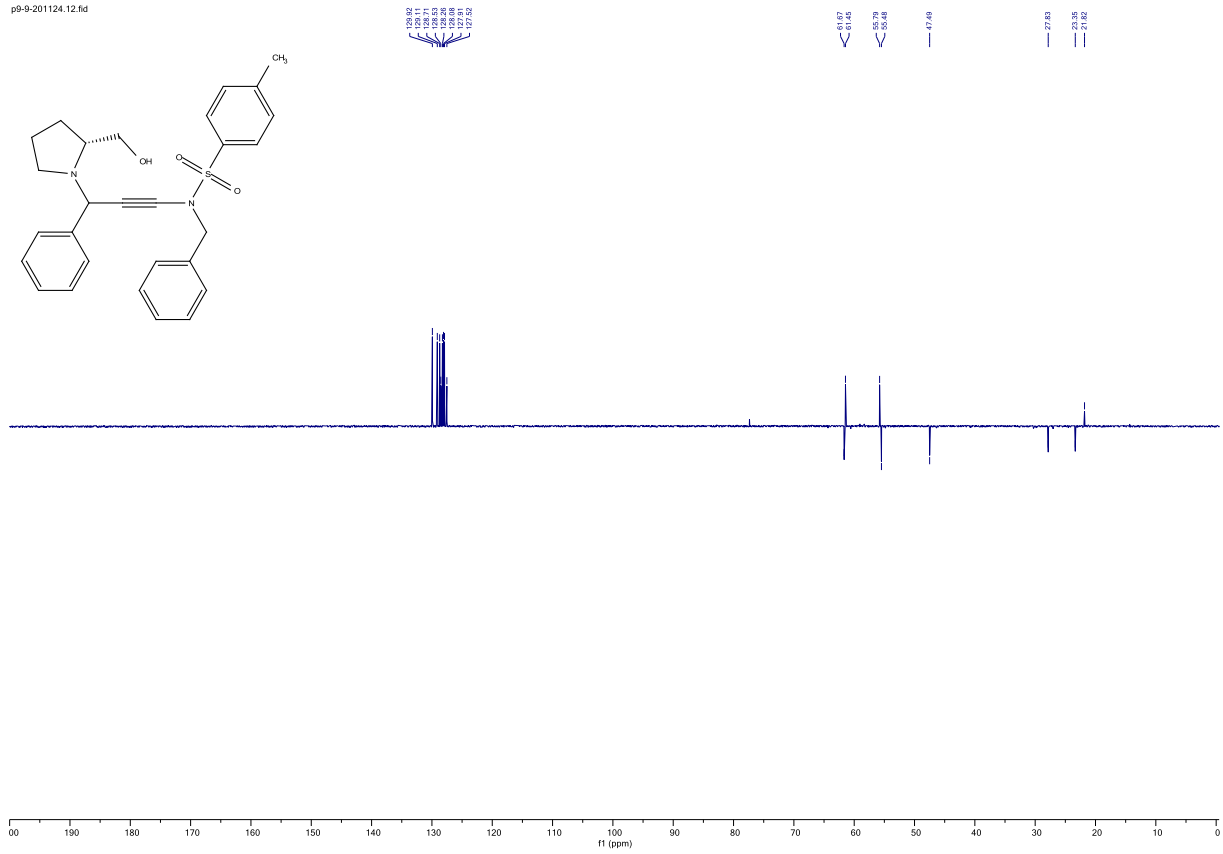

*N*-(3-(Allyl(4-methoxybenzyl)amino)-3-phenylprop-1-yn-1-yl)-*N*-benzyl-4-methylbenzenesulfonamide (**5f**)

<sup>1</sup>H NMR (500 MHz) in CDCl<sub>3</sub>

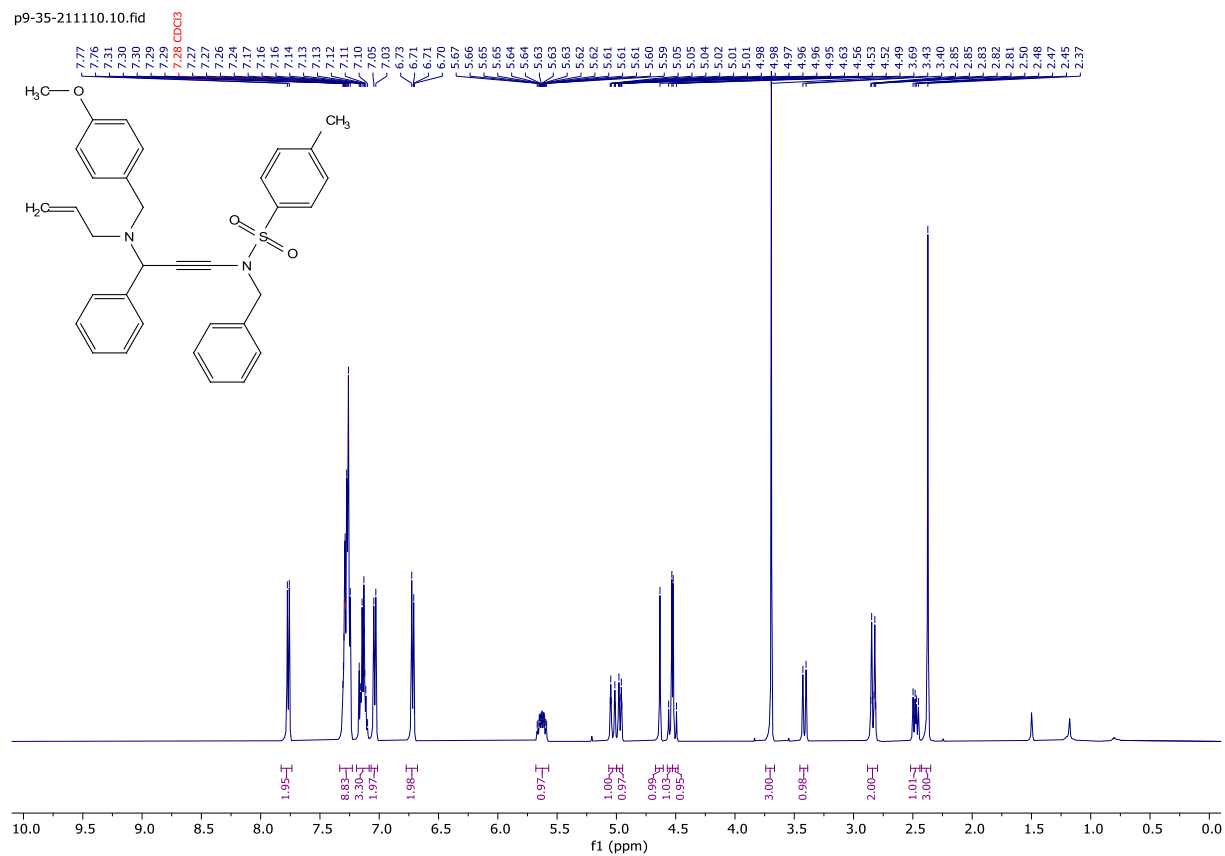



### <sup>13</sup>C NMR (126 MHz) in CDCl<sub>3</sub>

p9-35-211110.11.fid

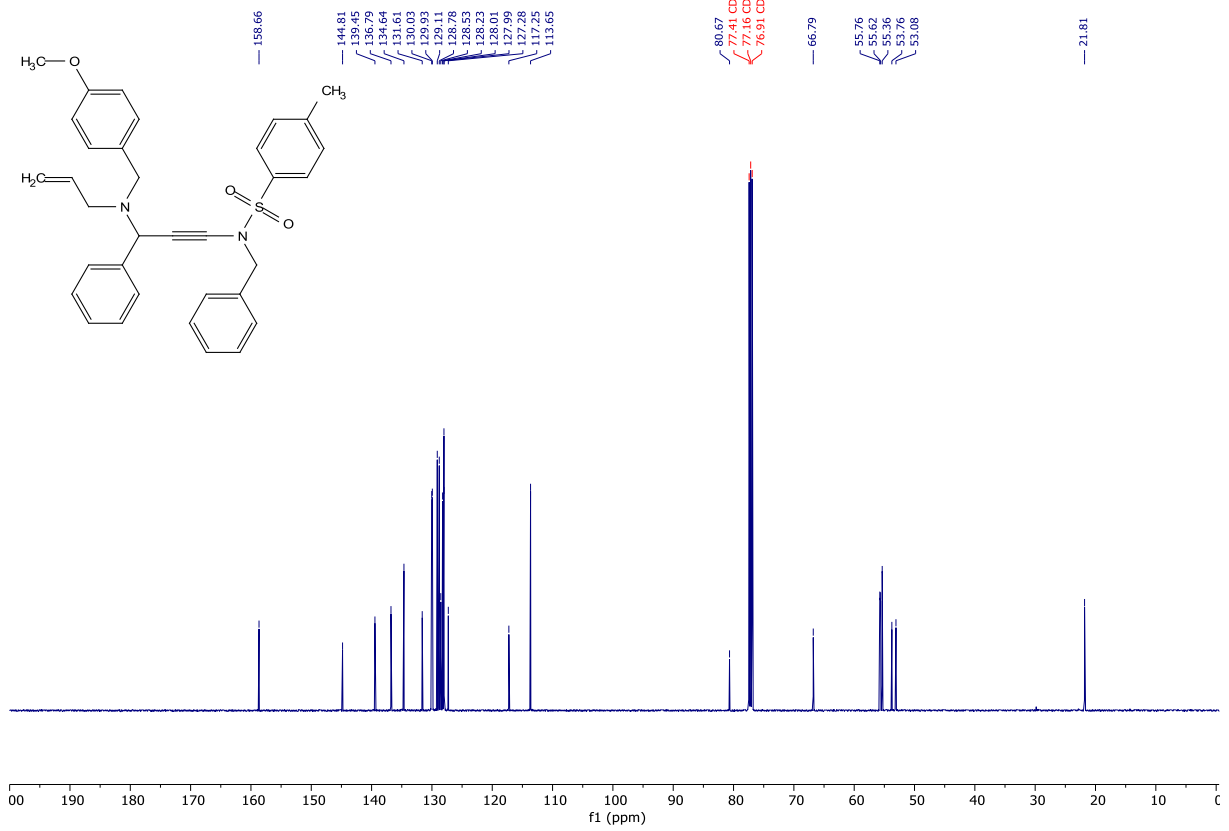

### DEPT135 NMR (126 MHz) in CDCl<sub>3</sub>

p9-35-211110.12.fid

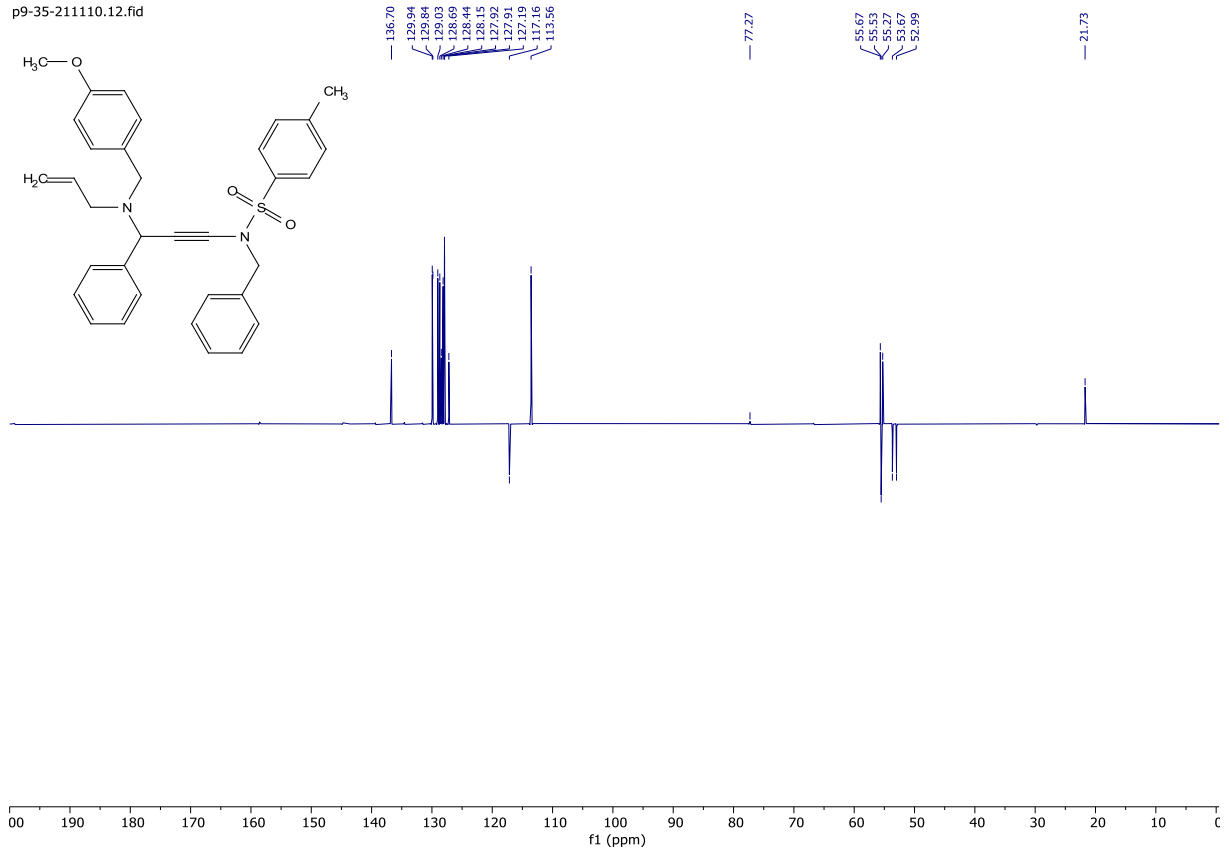



# <sup>13</sup>C NMR (126 MHz) in CDCl<sub>3</sub>

p9-26-210226.11.fid

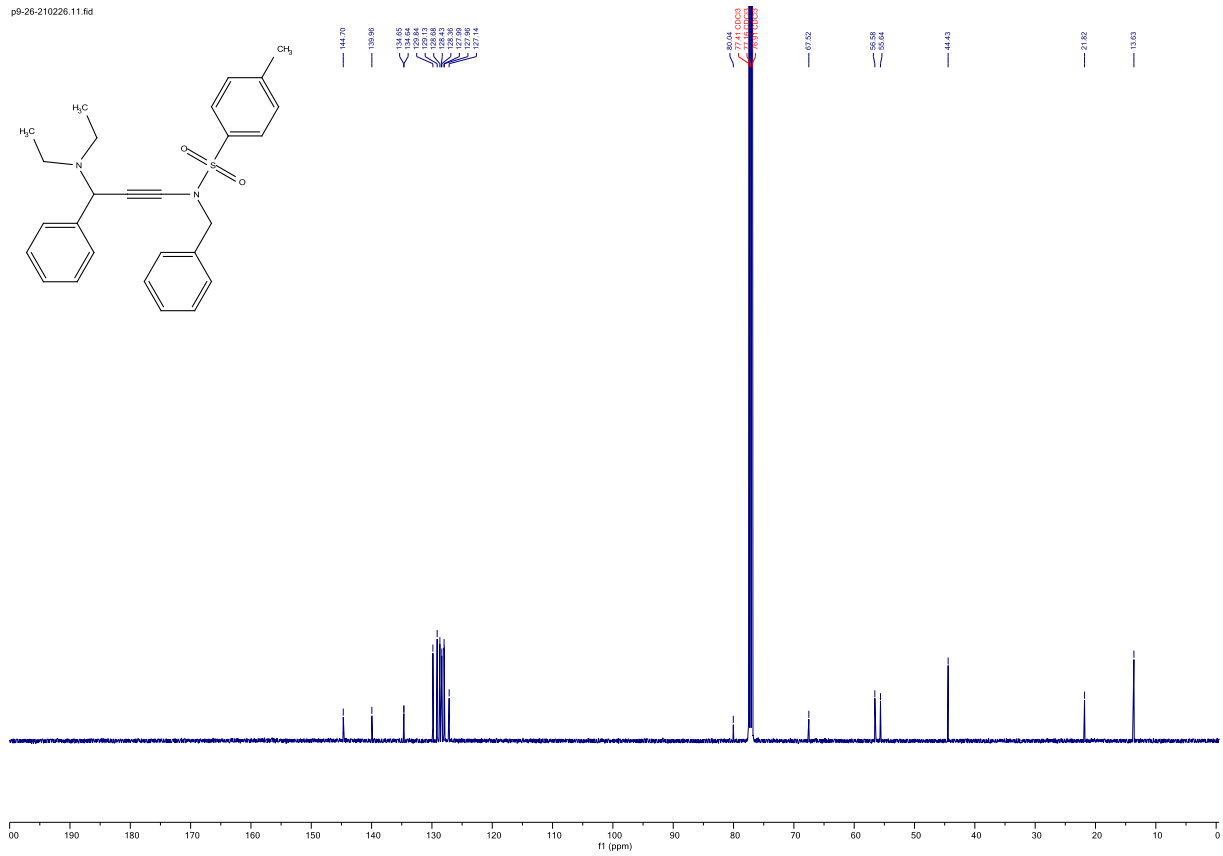

# DEPT135 NMR (126 MHz) in CDCl<sub>3</sub>

p9-26-210226.12.fid

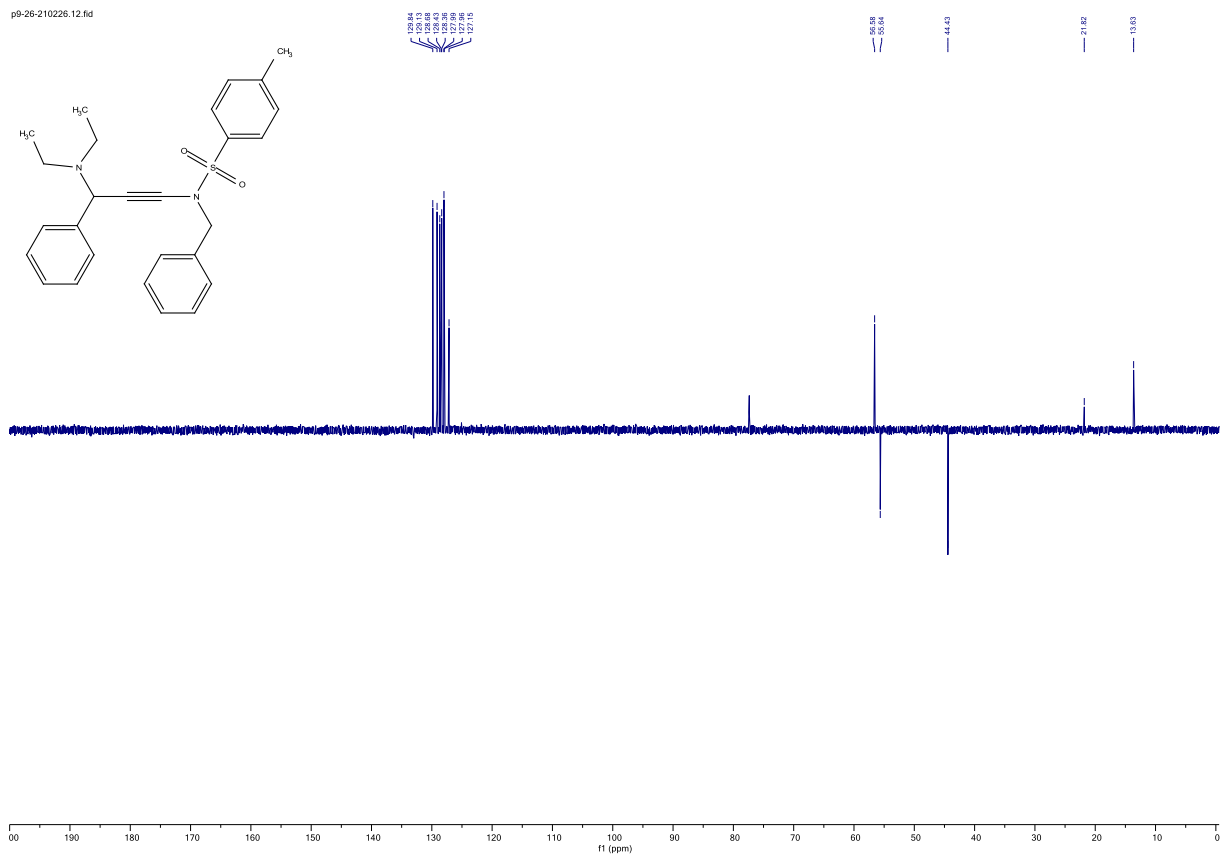

*N*-Benzyl-*N*-(3-(benzylamino)-3-phenylprop-1-yn-1-yl)-4-methylbenzenesulfonamide

**(5k)**

<sup>1</sup>H NMR (500 MHz) in CDCl<sub>3</sub>

p9-43-210504.10.fid

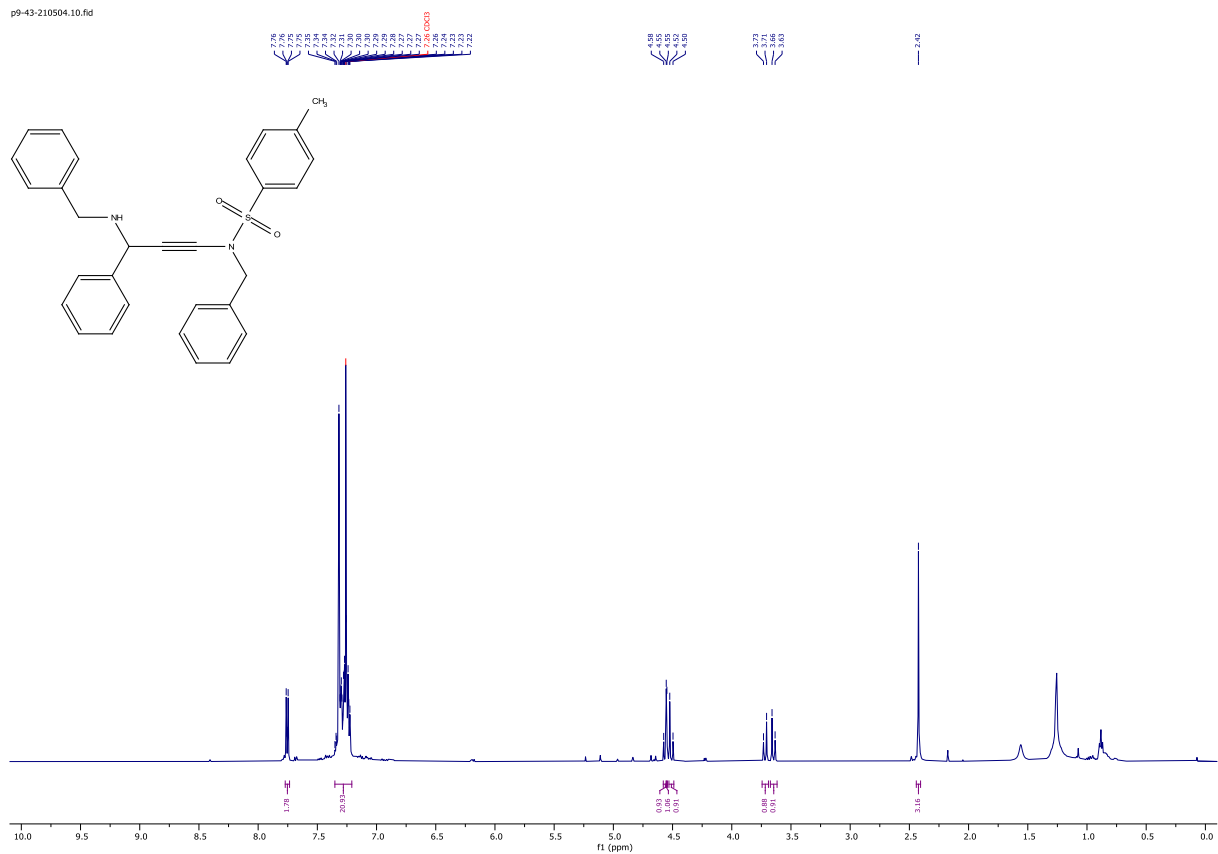

### <sup>13</sup>C NMR (126 MHz) in CDCl<sub>3</sub>

p9-43-210504.11.fid

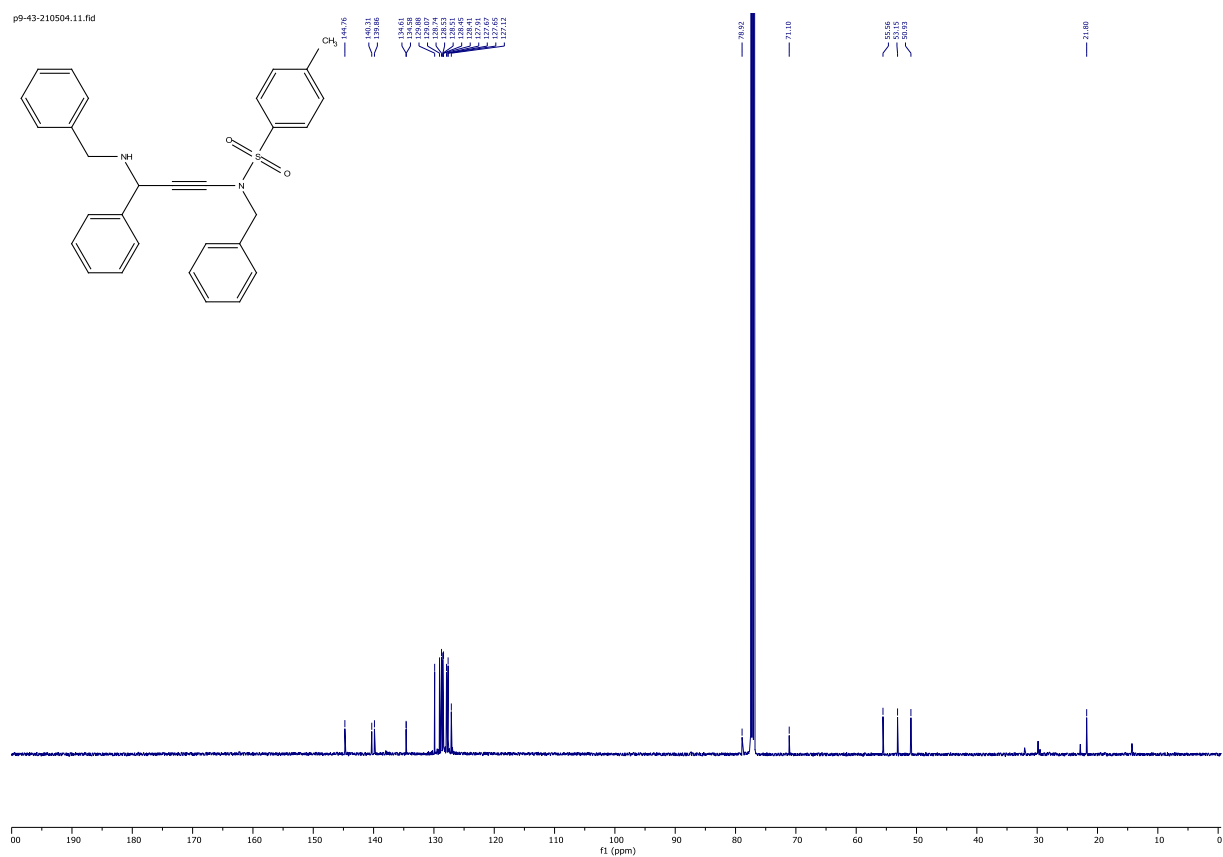

### DEPT135 NMR (126 MHz) in CDCl<sub>3</sub>

p9-43-210504.12.fid

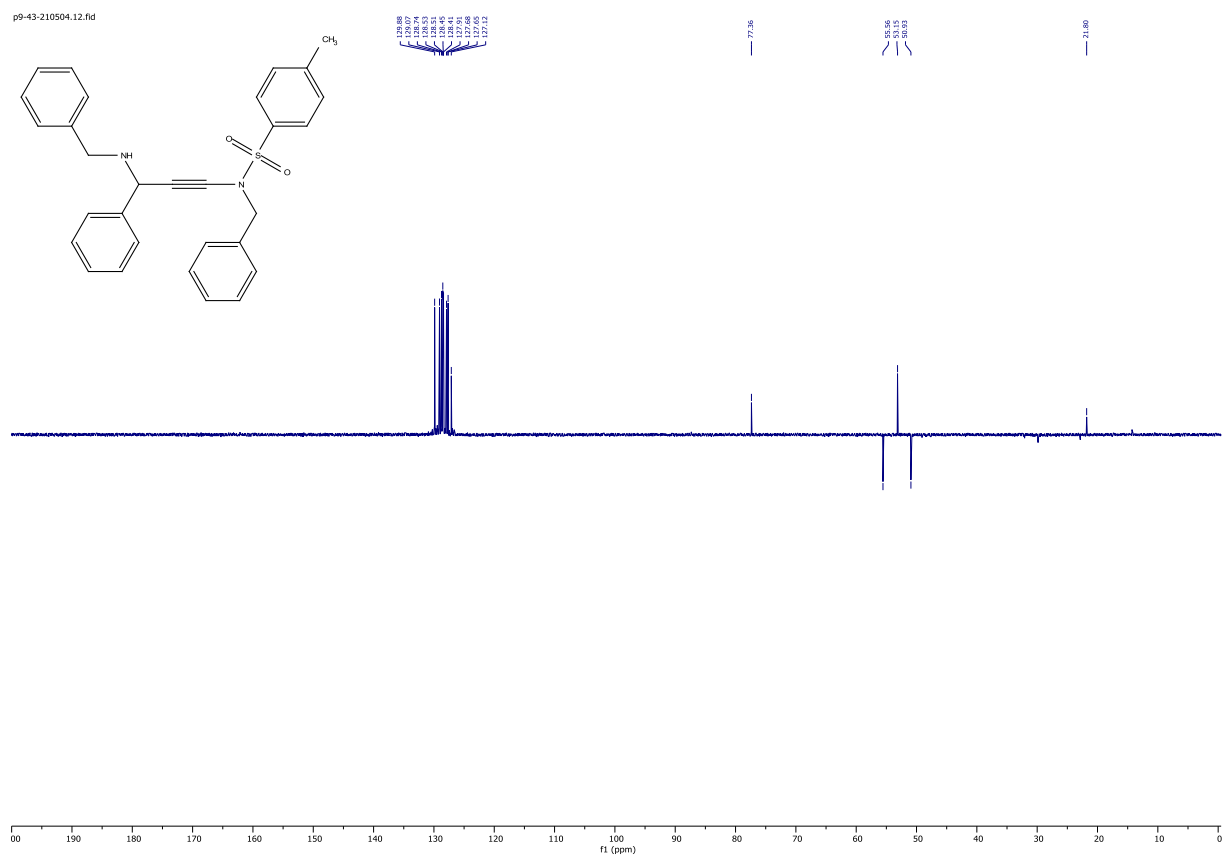



# <sup>13</sup>C NMR (126 MHz) in CDCl<sub>3</sub>

p9-39-210917.11.fid

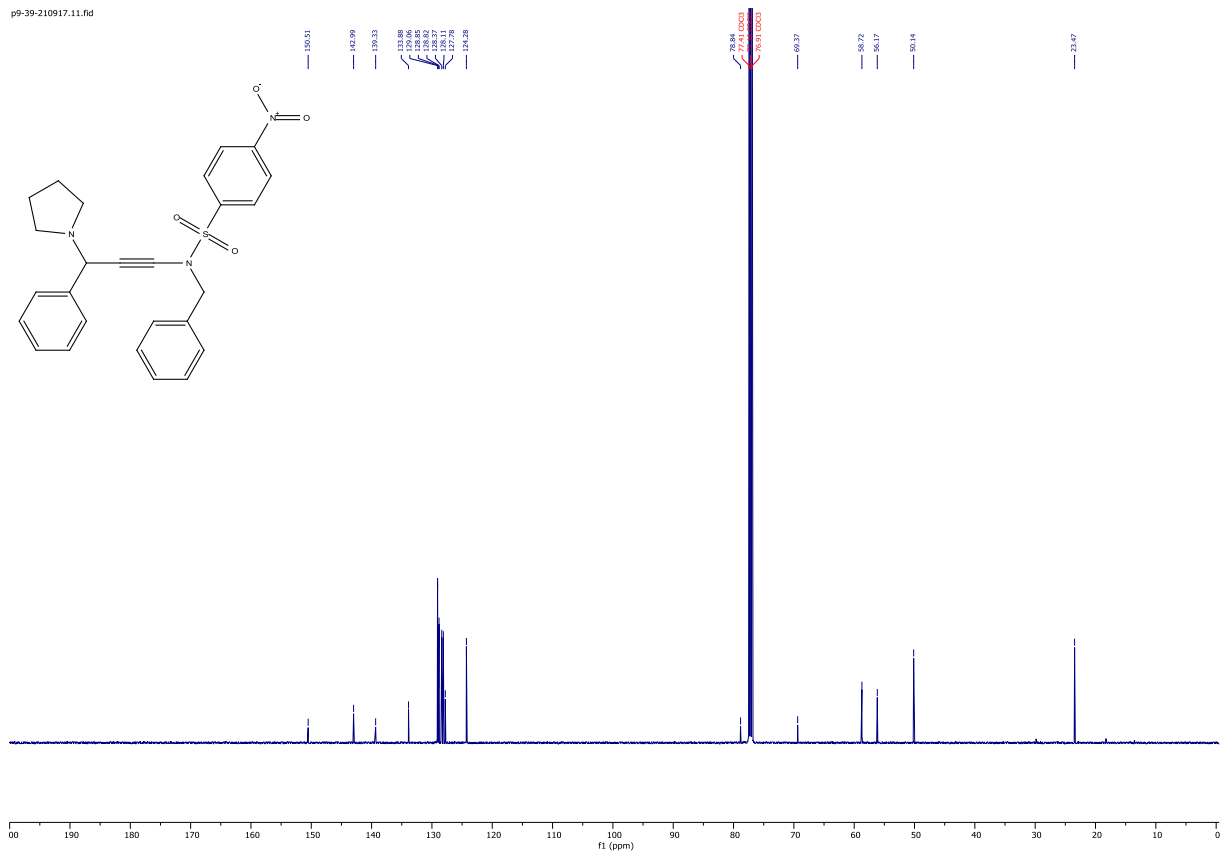

# DEPT135 NMR (126 MHz) in CDCl<sub>3</sub>

p9-39-210917.12.fid

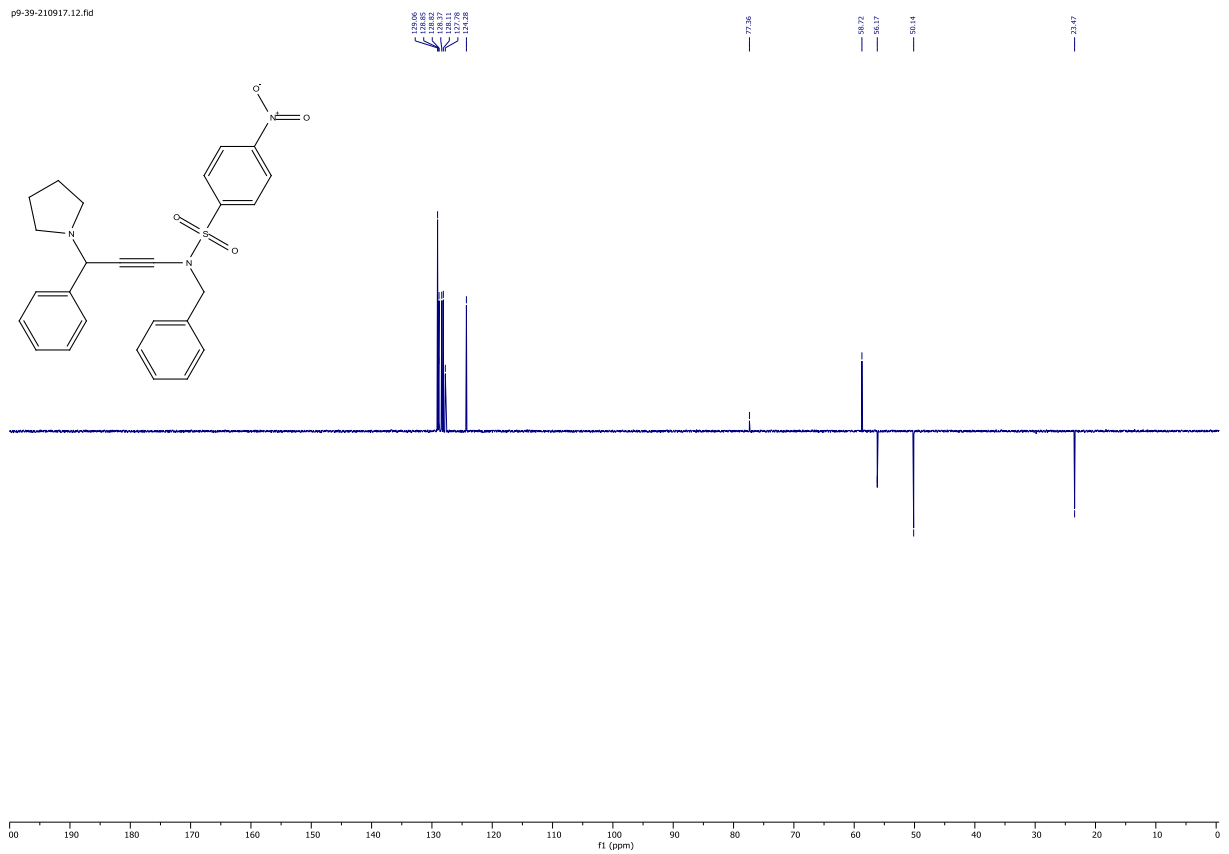

# *N*-Benzyl-*N*-(3-phenyl-3-(pyrrolidin-1-yl)prop-1-yn-1-yl)methanesulfonamide (**6b**)

<sup>1</sup>H NMR (500 MHz) in CDCl<sub>3</sub>

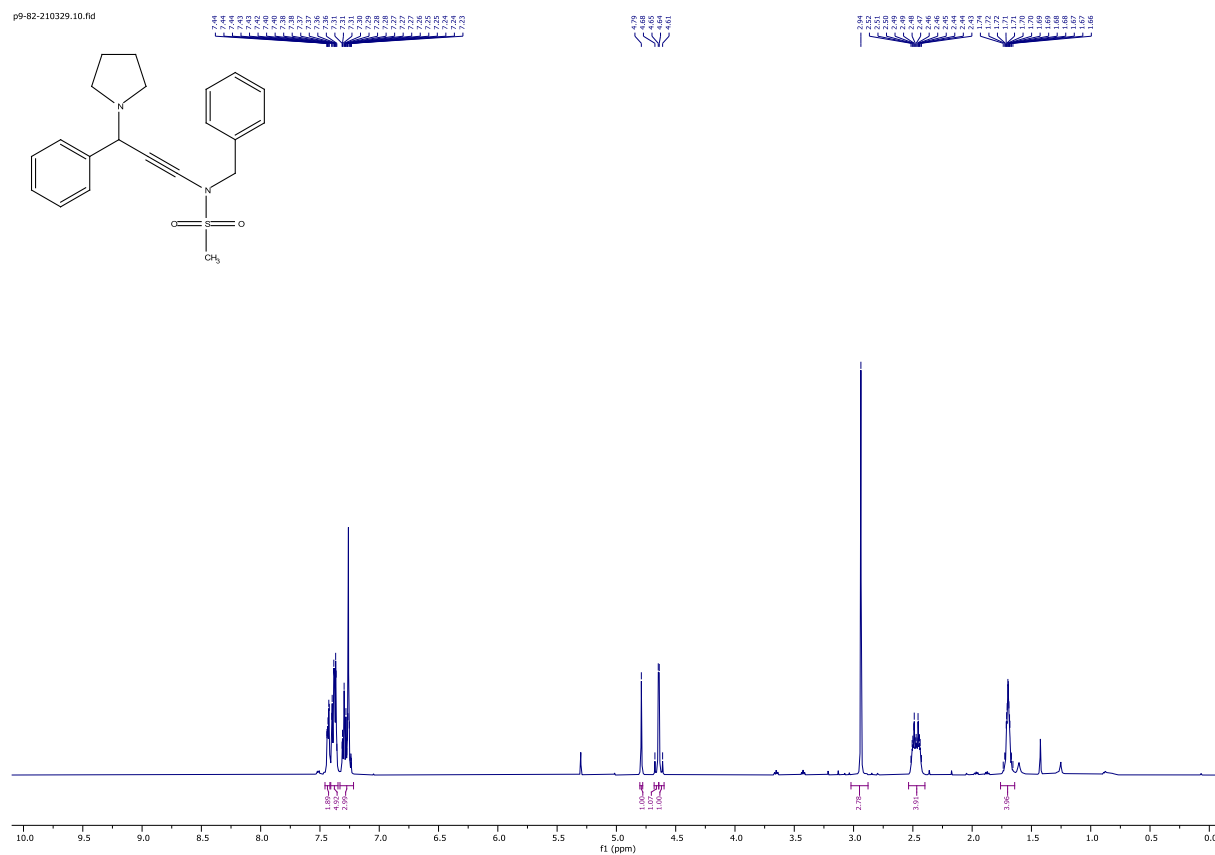

<sup>13</sup>C NMR (126 MHz) in CDCl<sub>3</sub>

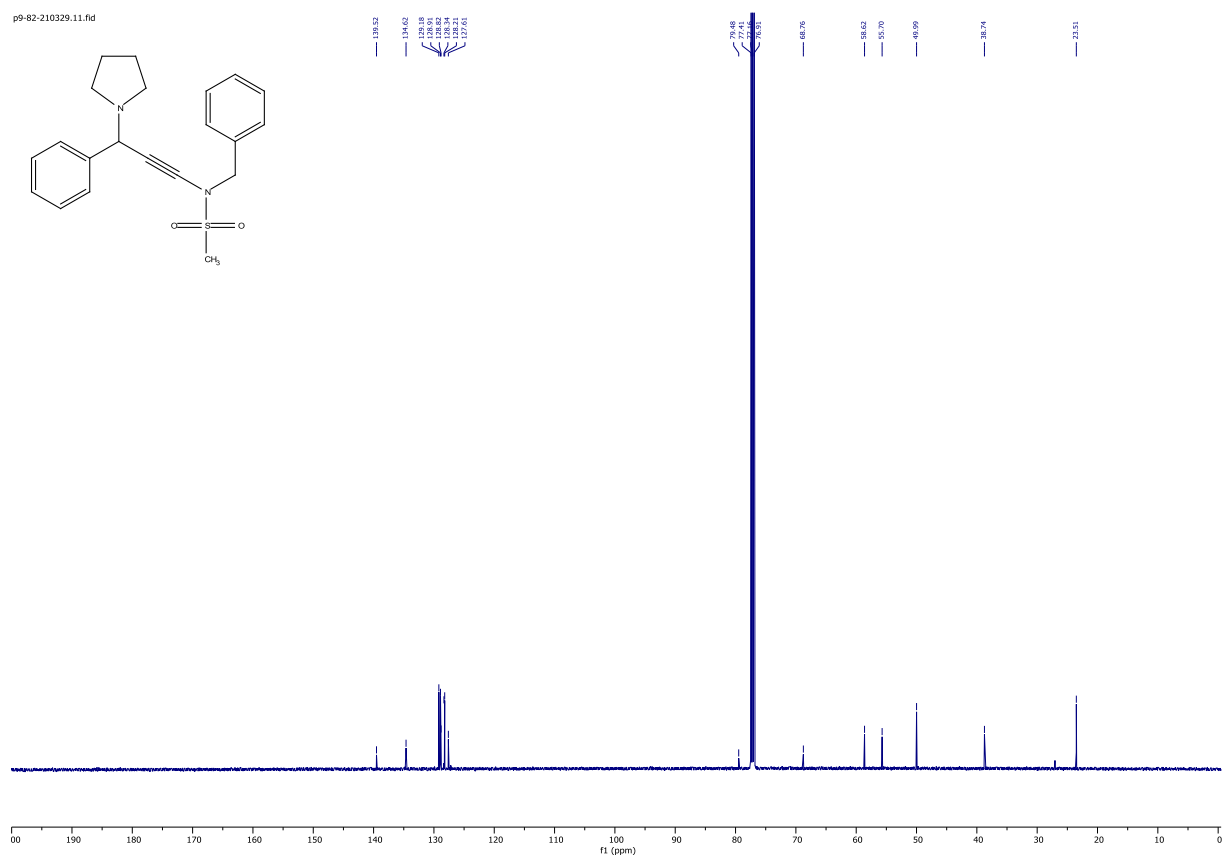





# *N*-Benzyl-4-nitro-*N*-((1-(pyrrolidin-1-yl)cyclohexyl)ethynyl)benzenesulfonamide (**6c**)

## <sup>1</sup>H NMR (500 MHz) in CDCl<sub>3</sub>

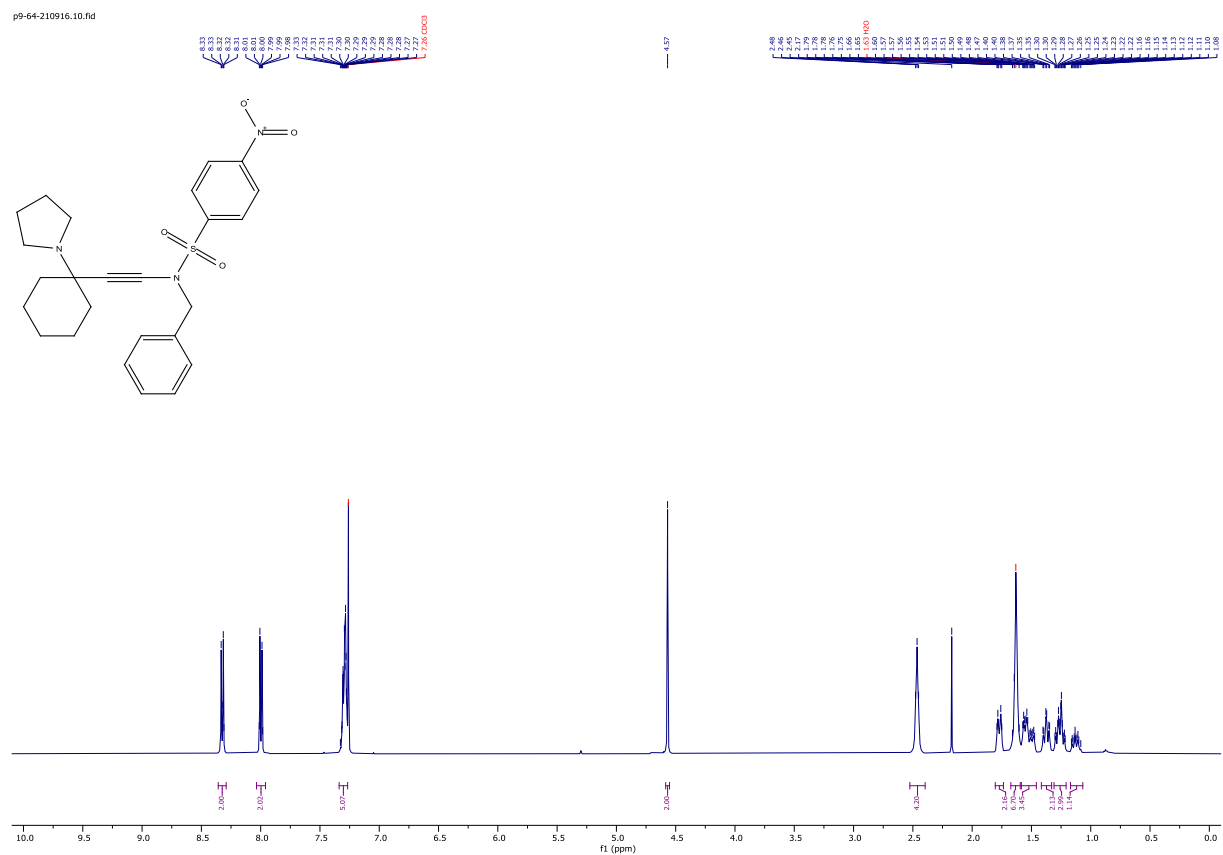

## <sup>13</sup>C NMR (126 MHz) in CDCl<sub>3</sub>

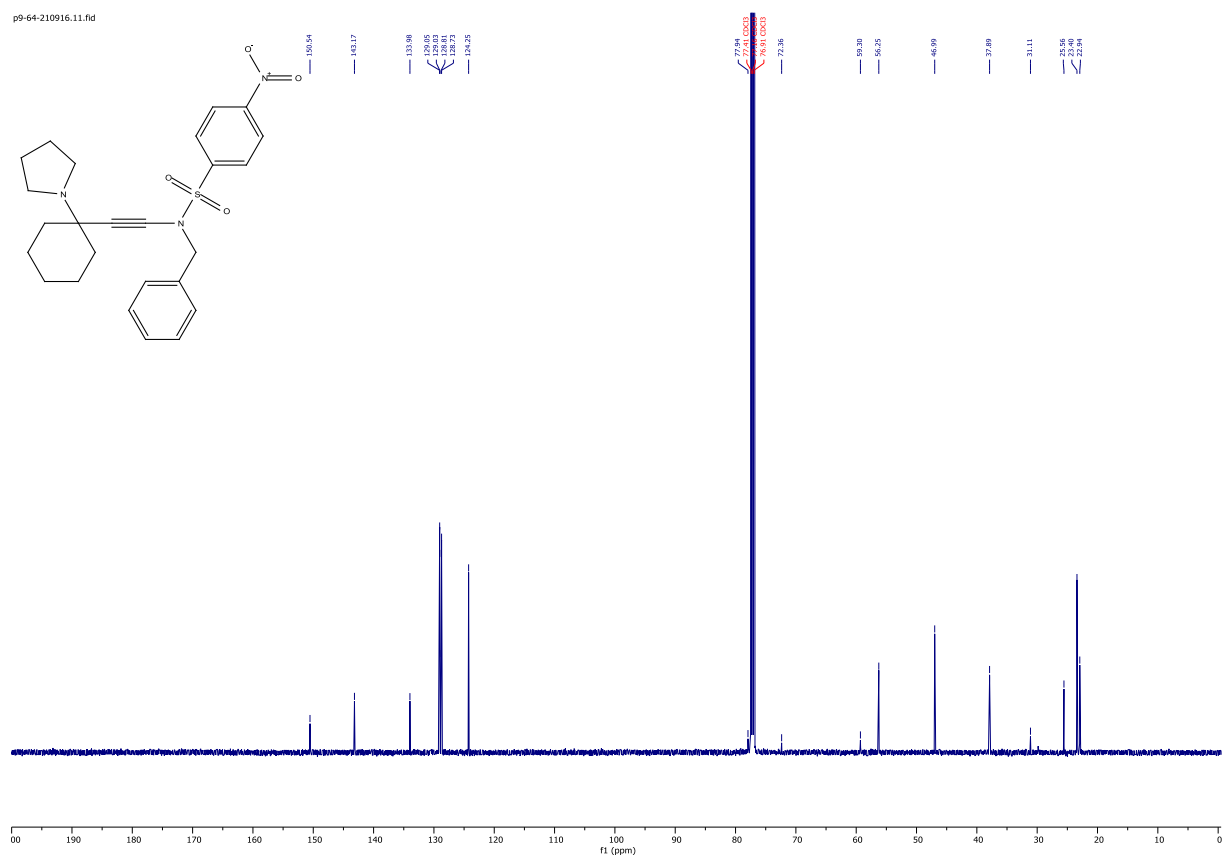

# DEPT135 NMR (126 MHz) in CDCl<sub>3</sub>

p9-64-210916.12.fid

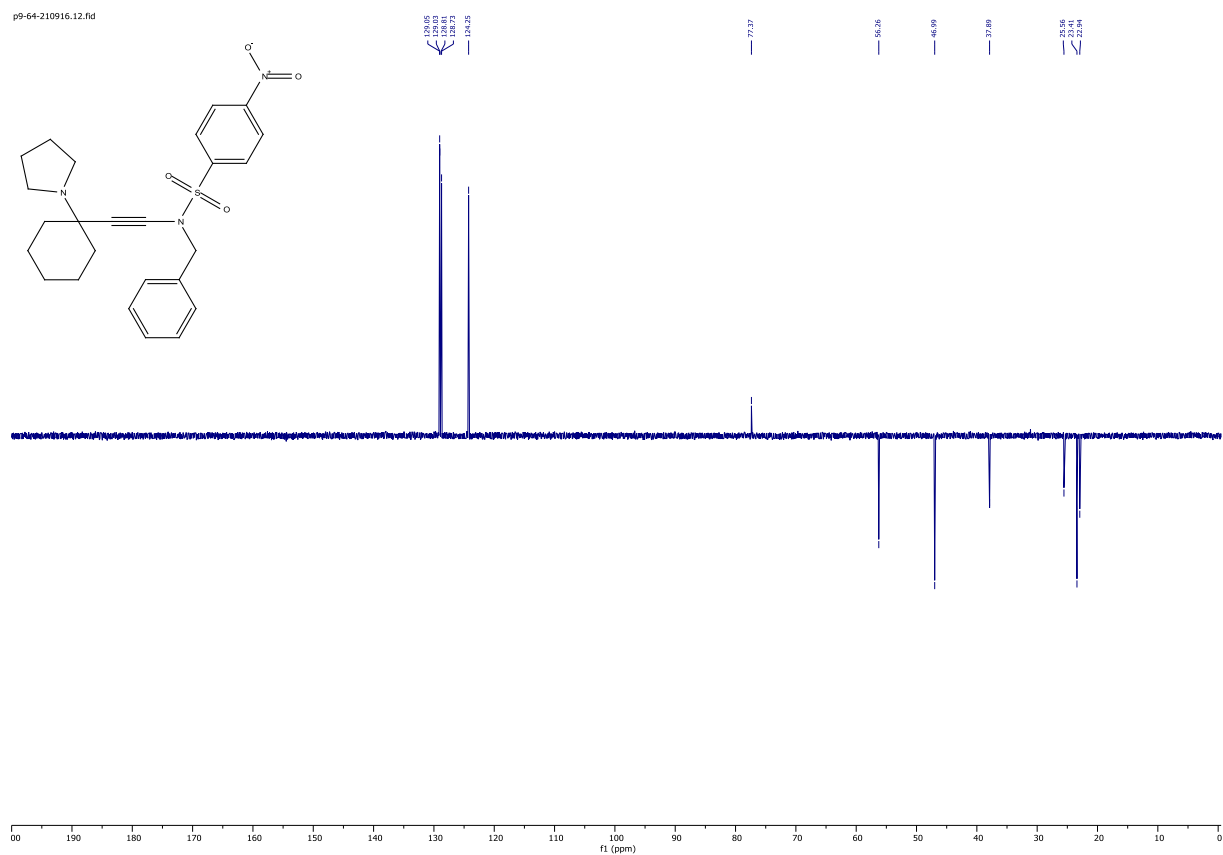

# *N*-Benzyl-*N*-((1-(pyrrolidin-1-yl)cyclohexyl)ethynyl)methanesulfonamide (**6d**)

**<sup>1</sup>H NMR (500 MHz) in CDCl<sub>3</sub>**

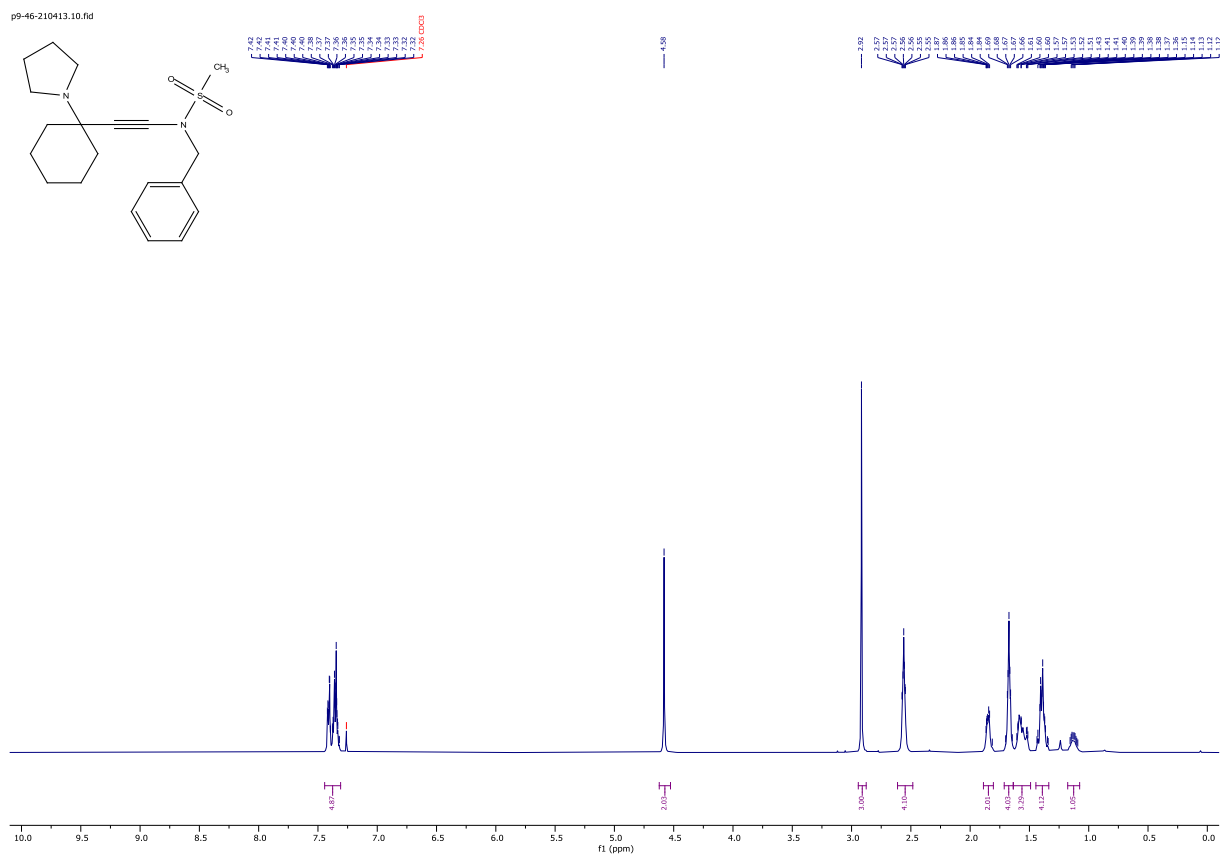

**<sup>13</sup>C NMR (126 MHz) in CDCl<sub>3</sub>**

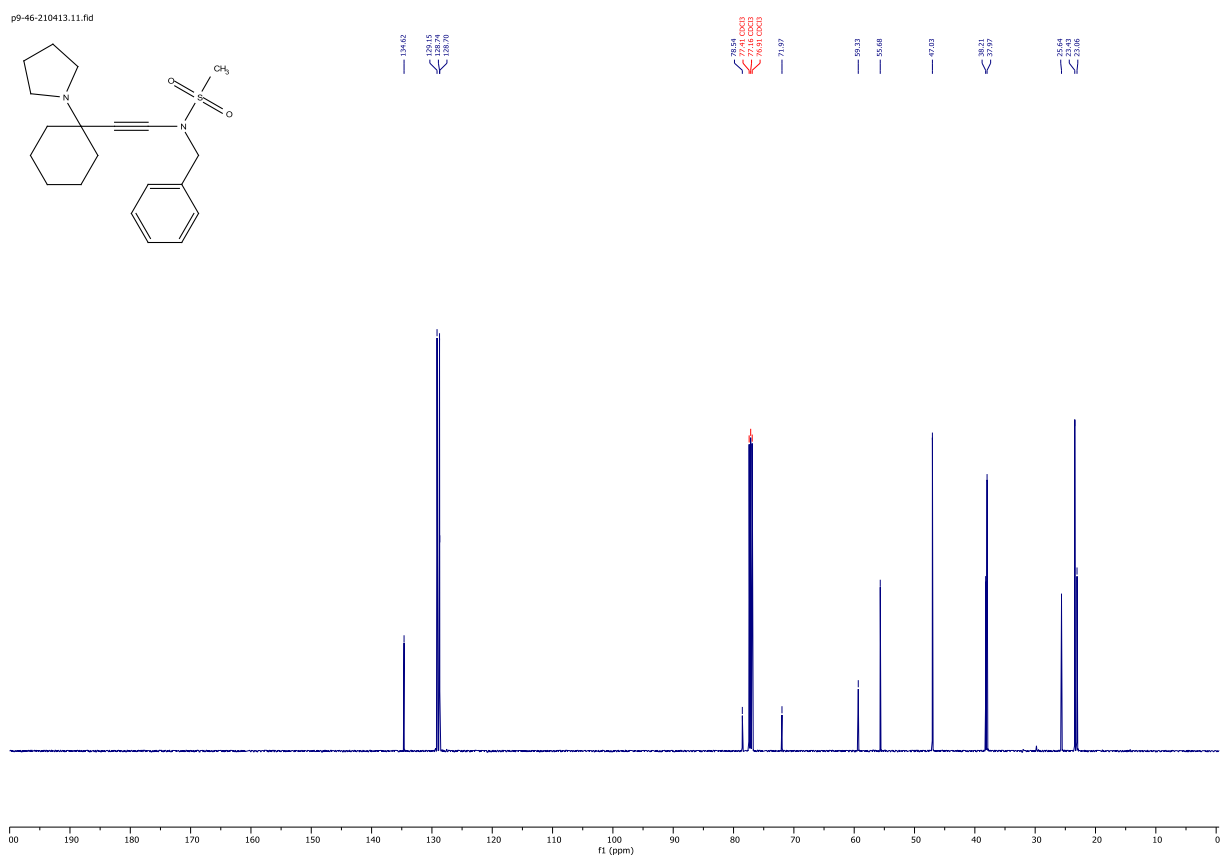

# DEPT135 NMR (126 MHz) in CDCl<sub>3</sub>

p9-46-210413.12.fid

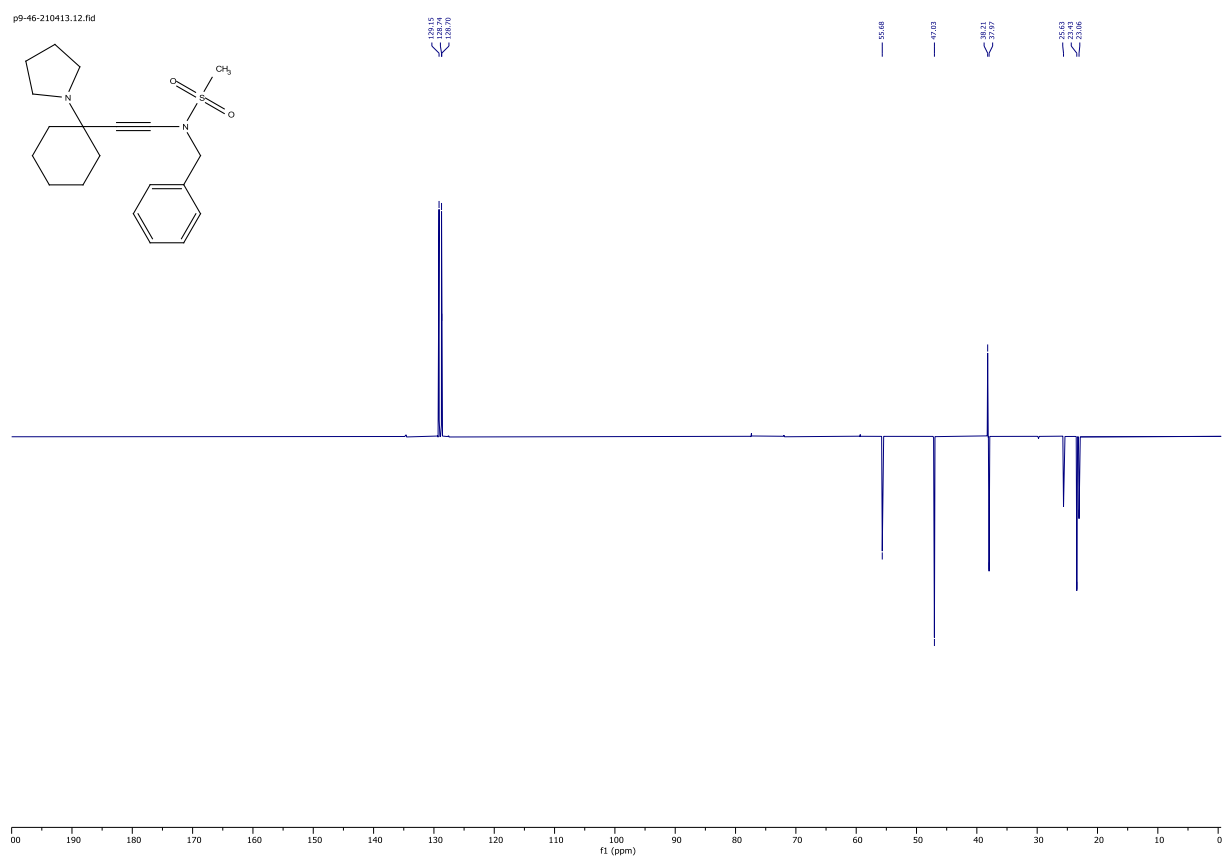

# 1-(3-Phenyl-3-(pyrrolidin-1-yl)prop-1-yn-1-yl)pyrrolidin-2-one (6e)

## <sup>1</sup>H NMR (500 MHz) in CDCl<sub>3</sub>

p9-10-210608.10.fid

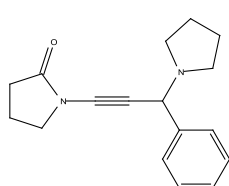

7.48  
7.46  
7.27  
7.26  
7.25  
7.24  
7.23  
7.22  
7.21  
7.18

4.77

3.66  
3.64  
3.64  
3.63

2.55  
2.54  
2.53  
2.52  
2.51  
2.50  
2.49  
2.48  
2.47  
2.46  
2.45  
2.44  
2.43  
2.42  
2.41  
2.40  
2.39  
2.38  
2.37  
2.36  
2.35  
2.34  
2.33  
2.32  
2.31  
2.30  
2.29  
2.28  
2.27  
2.26  
2.25  
2.24  
2.23  
2.22  
2.21  
2.20  
2.19  
2.18  
2.17  
2.16  
2.15  
2.14  
2.13  
2.12  
2.11  
2.10  
2.09  
2.08  
2.07  
2.06  
2.05  
2.04  
2.03  
2.02  
2.01  
2.00  
1.99  
1.98  
1.97  
1.96  
1.95  
1.94  
1.93  
1.92  
1.91  
1.90  
1.89  
1.88  
1.87  
1.86  
1.85  
1.84  
1.83  
1.82  
1.81  
1.80  
1.79  
1.78  
1.77  
1.76  
1.75  
1.74  
1.73  
1.72  
1.71  
1.70  
1.69  
1.68  
1.67  
1.66  
1.65

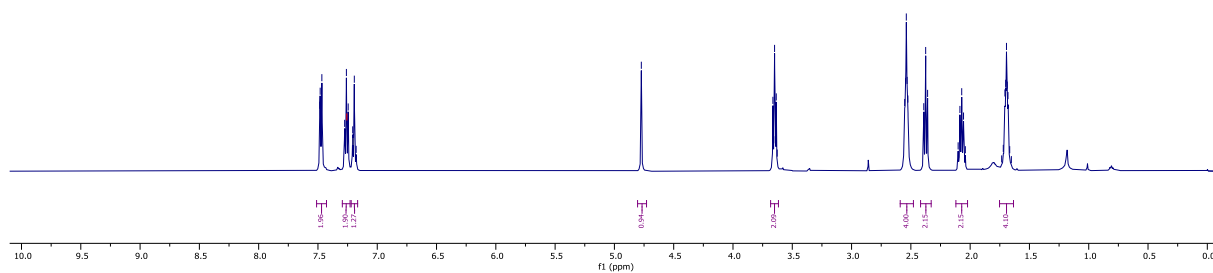

## <sup>13</sup>C NMR (126 MHz) in CDCl<sub>3</sub>

p9-10-210608.11.fid

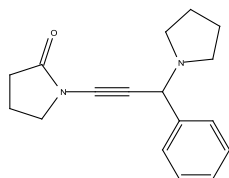

176.21

139.61

128.33

127.29

77.80  
77.14  
76.48

69.40

58.81

50.29

50.19

29.76

23.99

18.90

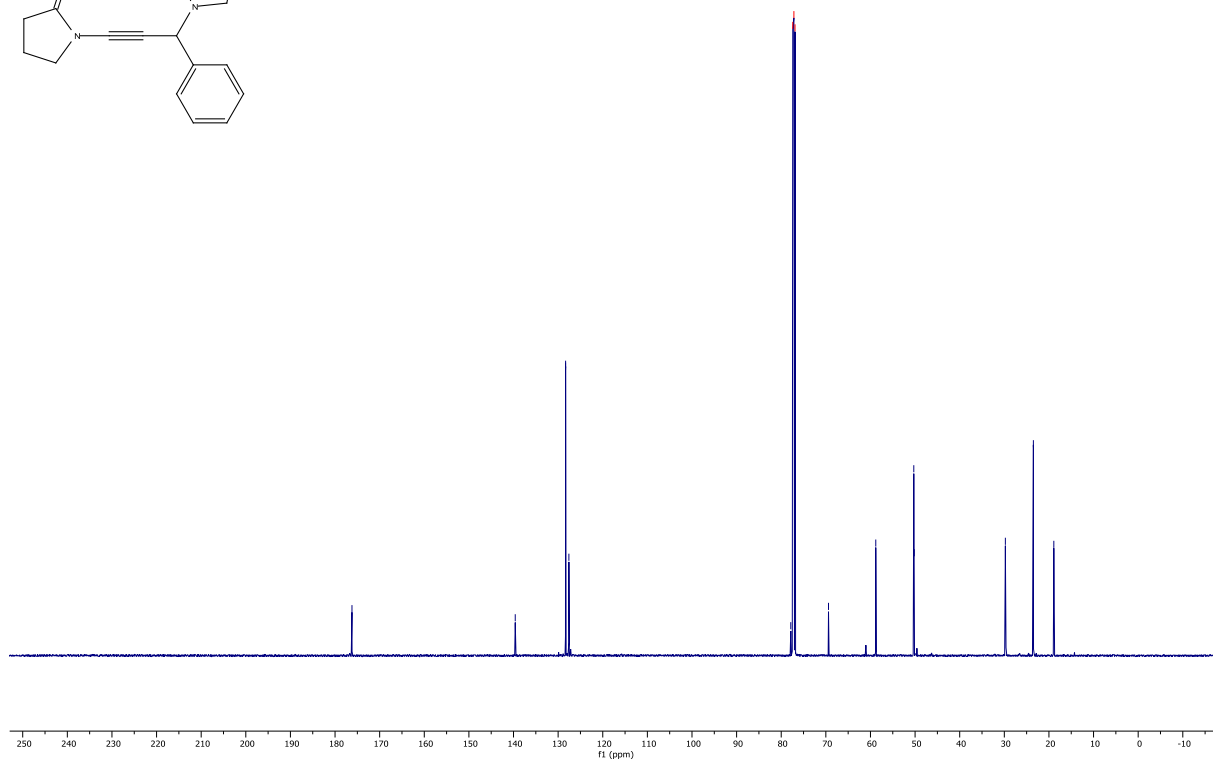

# DEPT135 NMR (126 MHz) in CDCl<sub>3</sub>

p9-10-210608.12.fid

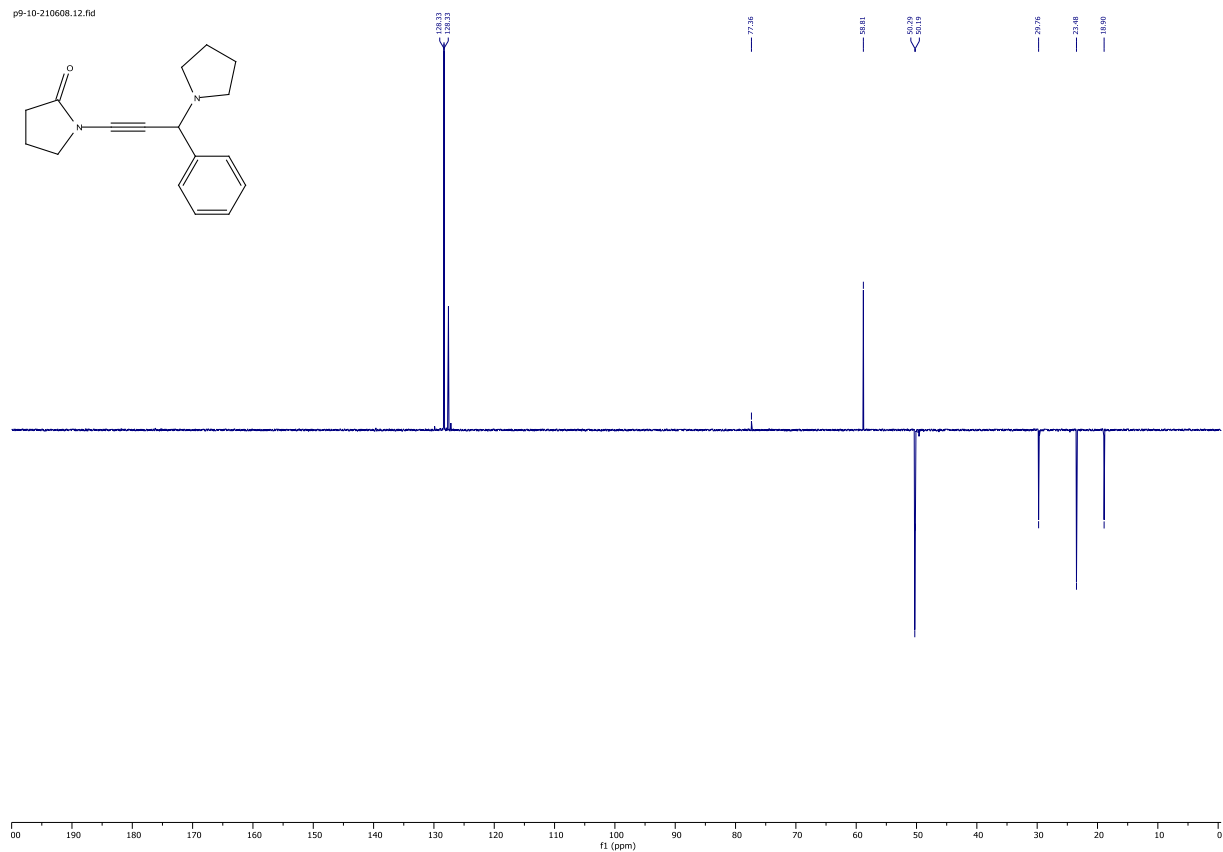

# 3-(3-Phenyl-3-(pyrrolidin-1-yl)prop-1-yn-1-yl)oxazolidin-2-one (6f)

<sup>1</sup>H NMR (500 MHz) in CDCl<sub>3</sub>

p9-30-210407.10.fid

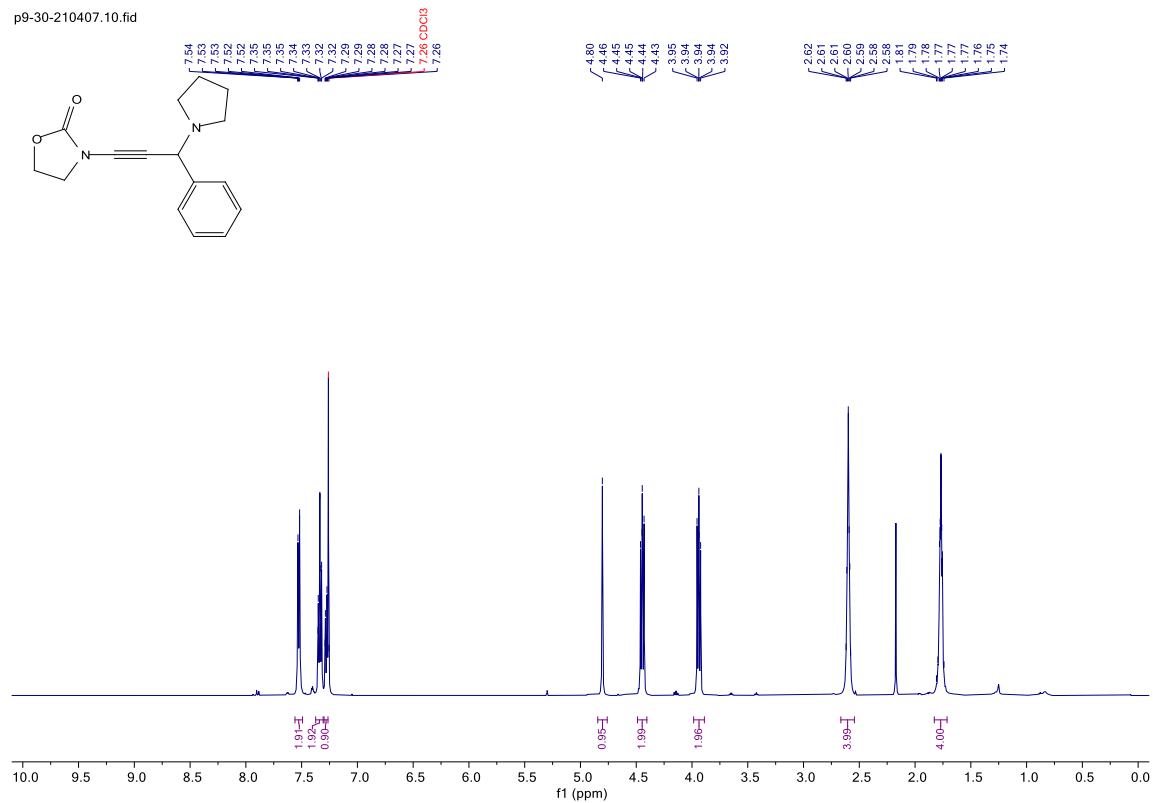

<sup>13</sup>C NMR (126 MHz) in CDCl<sub>3</sub>

p9-30-210407.11.fid

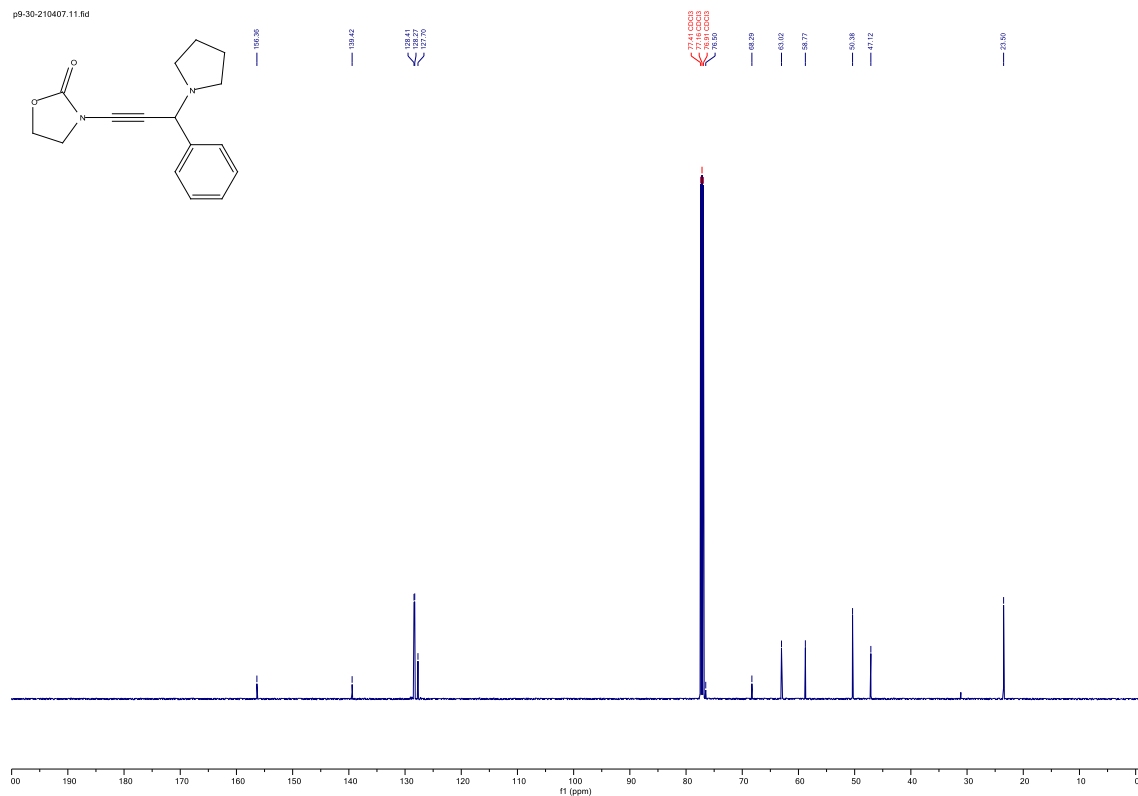



# DEPT135 NMR (126 MHz) in CDCl<sub>3</sub>

p9-30-210407.12.fid

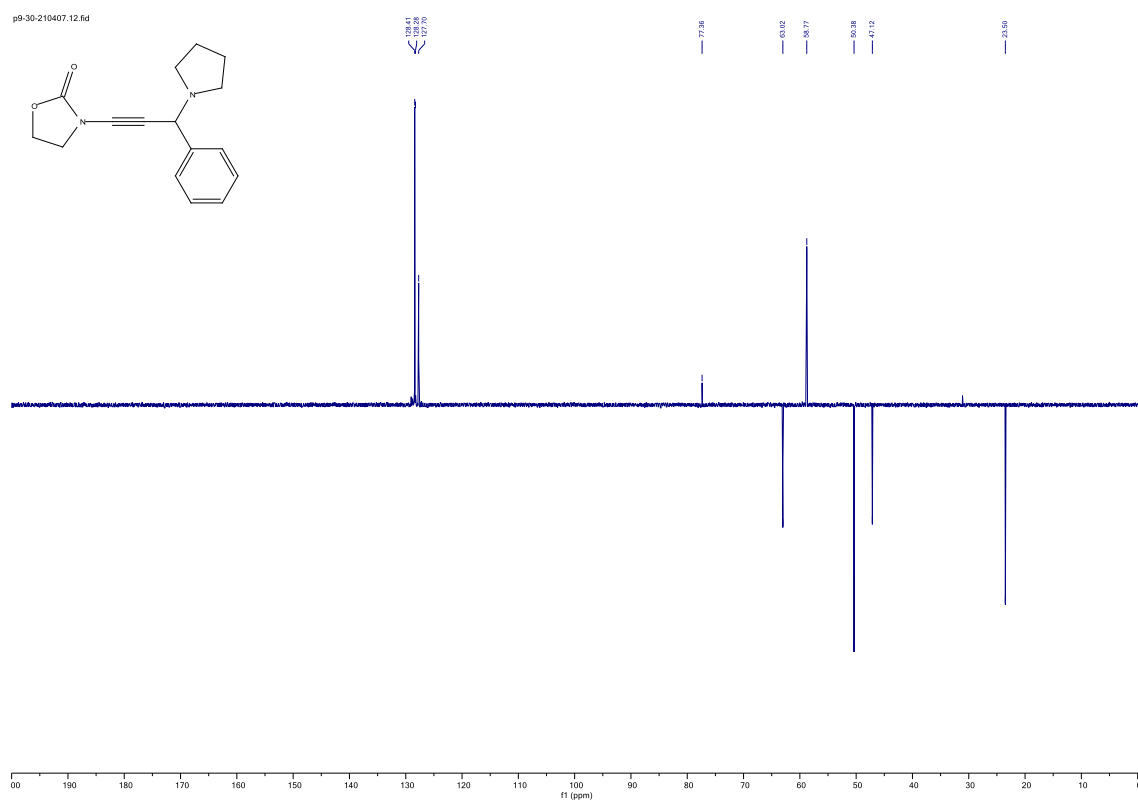

4-Methyl-N-phenyl-N-(3-phenyl-3-(pyrrolidin-1-yl)prop-1-yn-1-yl)benzenesulfonamide

**(6h)**

<sup>1</sup>H NMR (500 MHz) in CDCl<sub>3</sub>

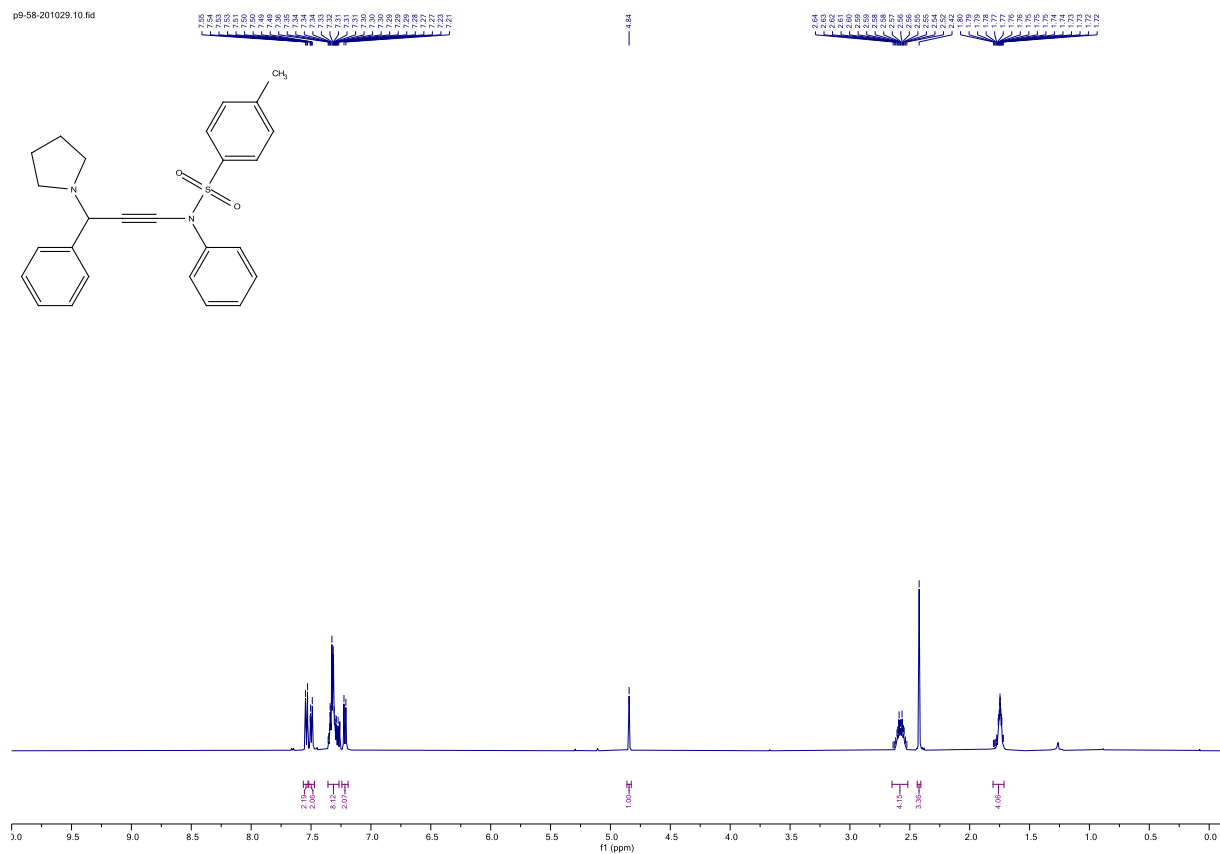

# <sup>13</sup>C NMR (126 MHz) in CDCl<sub>3</sub>

p9-58-201029.11.fid

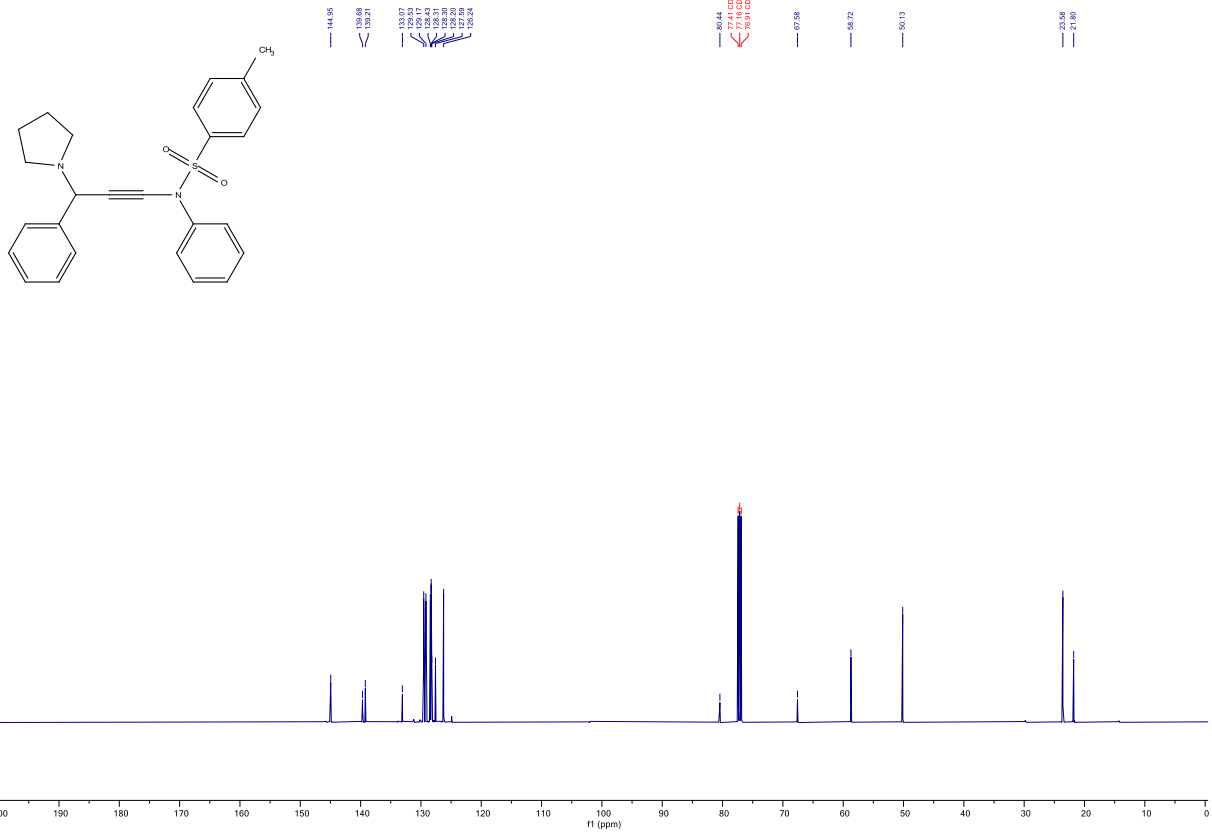

# DEPT135 NMR (126 MHz) in CDCl<sub>3</sub>

p9-58-201029.12.fid

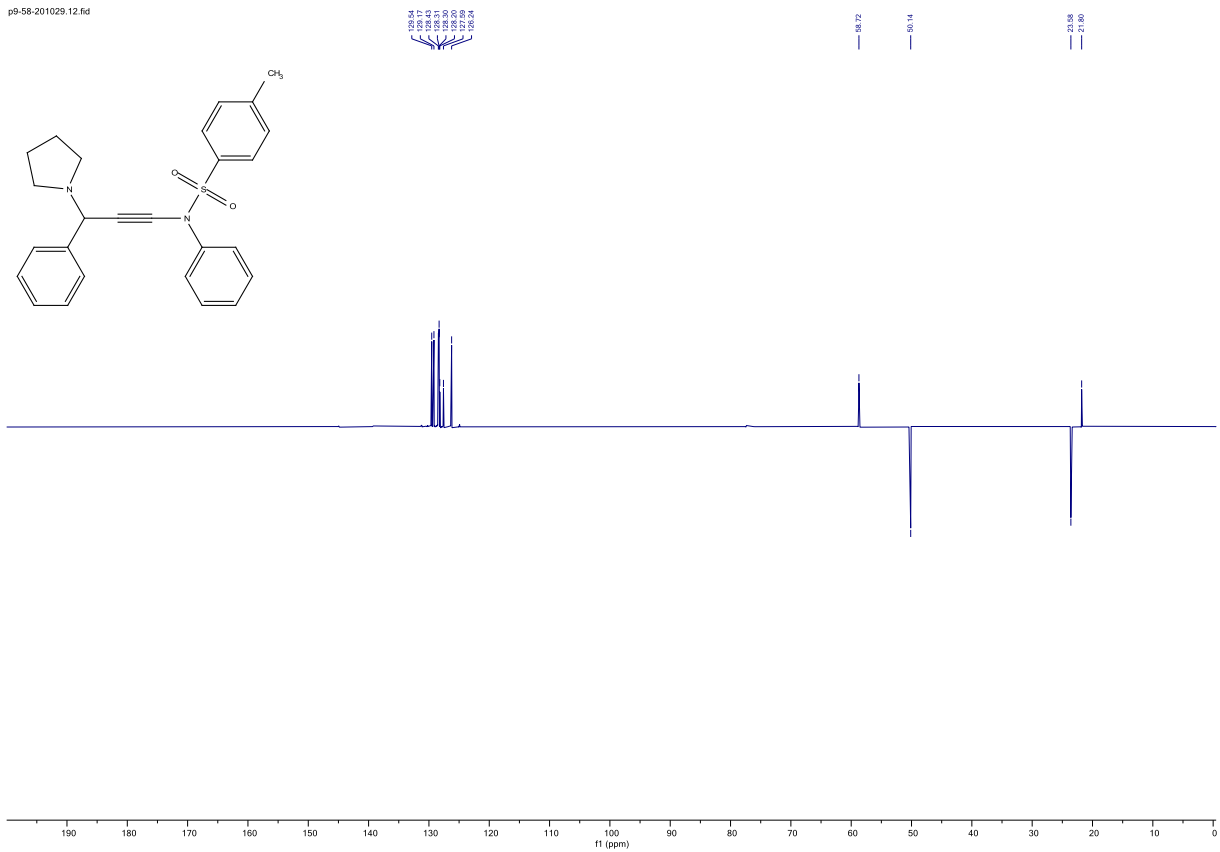

# 4-Methyl-N-phenyl-N-((1-(pyrrolidin-1-yl)cyclohexyl)ethynyl)benzenesulfonamide (6i)

<sup>1</sup>H NMR (300 MHz) in CDCl<sub>3</sub>

p9-3-201117.10.fid

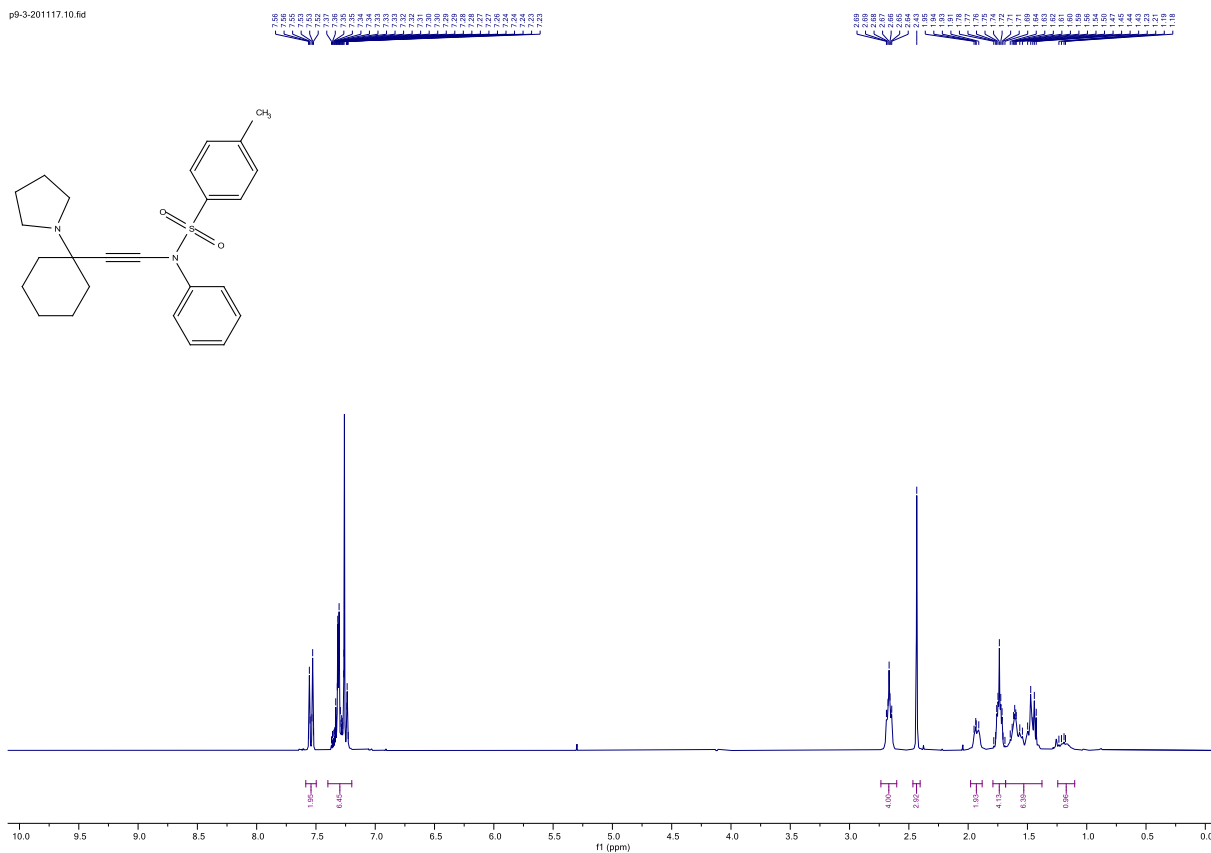

<sup>13</sup>C NMR (126 MHz) in CDCl<sub>3</sub>

p9-67-201117.10.fid

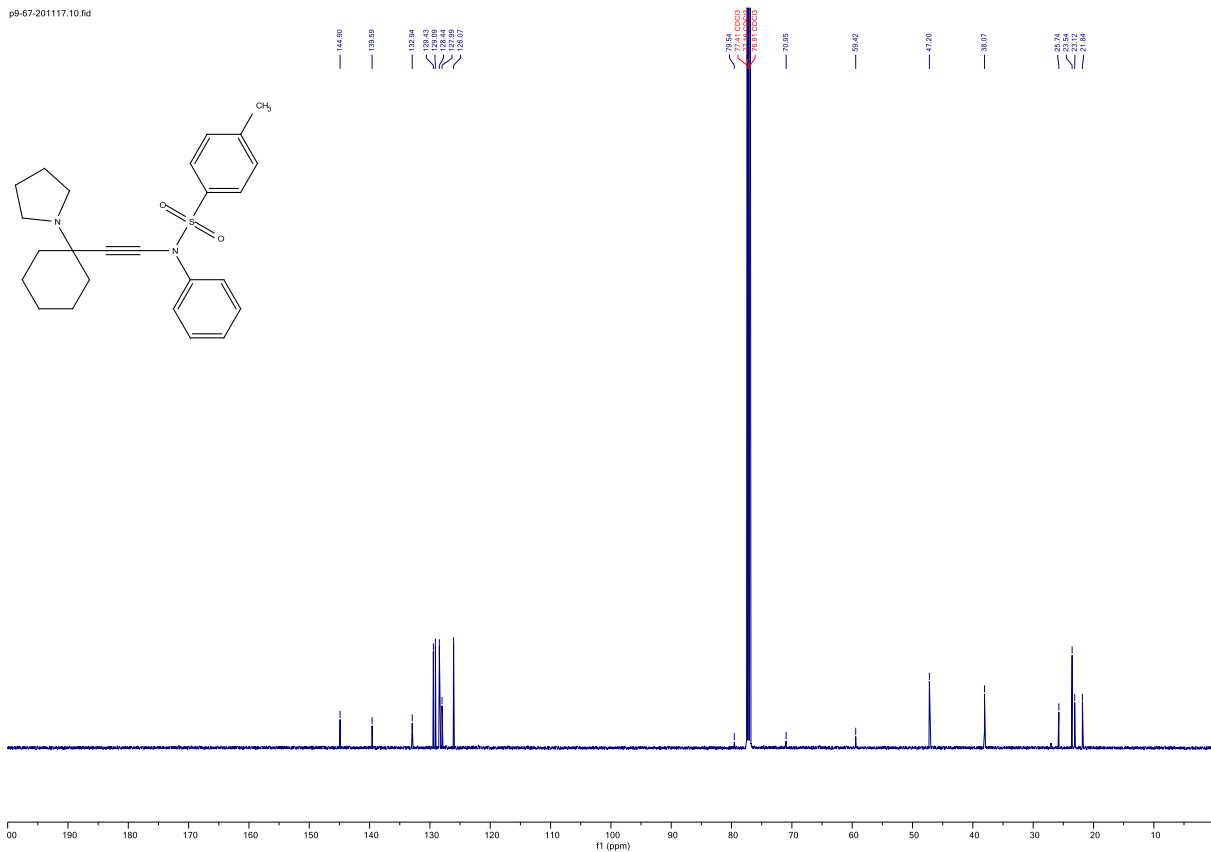

# DEPT135 NMR (126 MHz) in CDCl<sub>3</sub>

p9-67-201117.11.fid

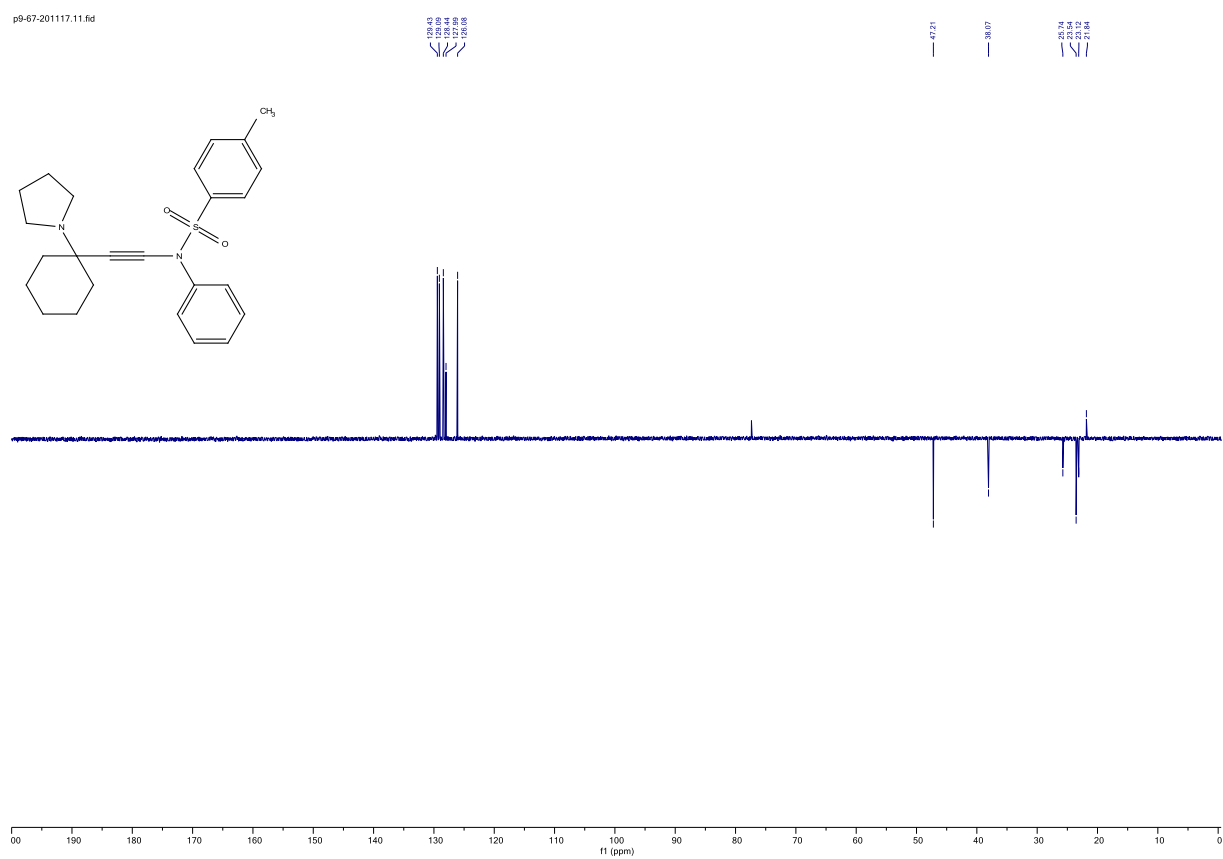

*N*-Allyl-4-methyl-*N*-(3-phenyl-3-(pyrrolidin-1-yl)prop-1-yn-1-yl)benzenesulfonamide

**(6j)**

**<sup>1</sup>H NMR (500 MHz) in CDCl<sub>3</sub>**

p9-40-201209.10.fid

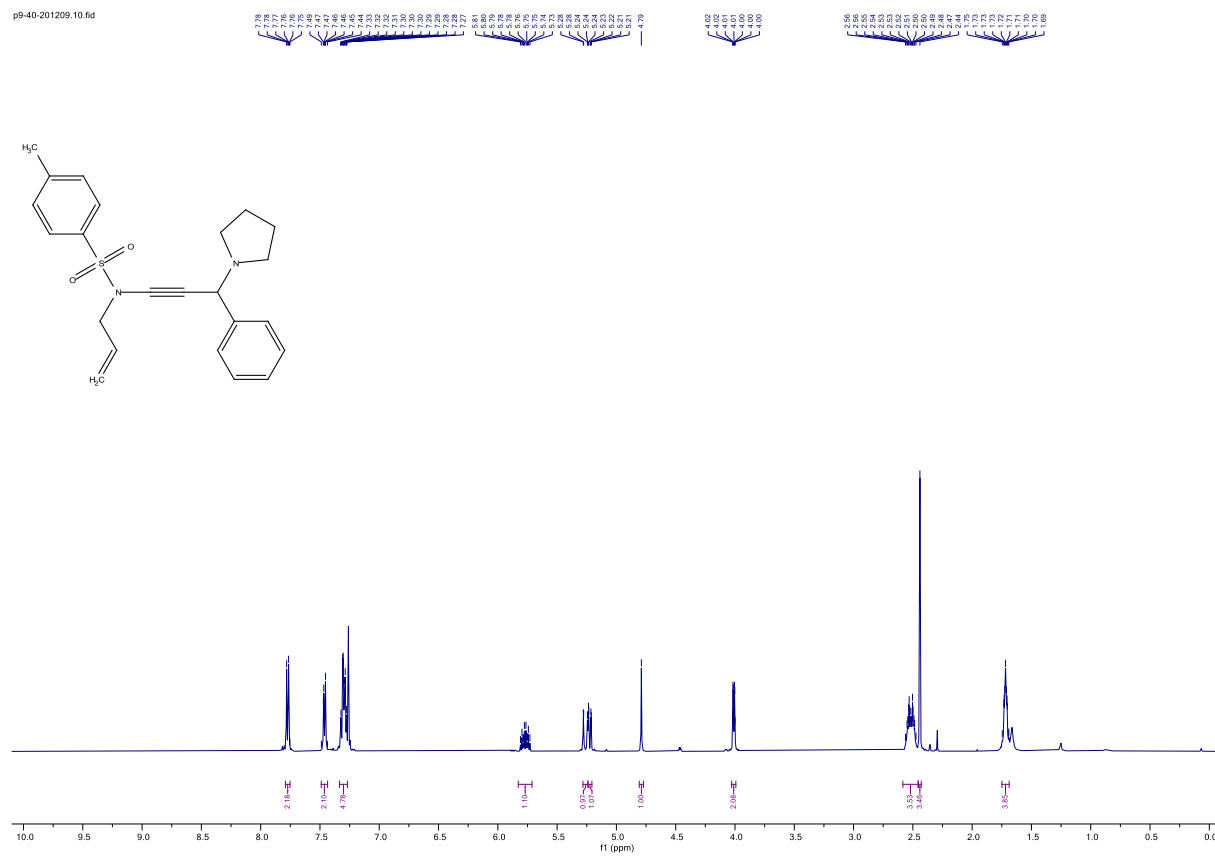

# <sup>13</sup>C NMR (126 MHz) in CDCl<sub>3</sub>

p9-40-201209.11.fid

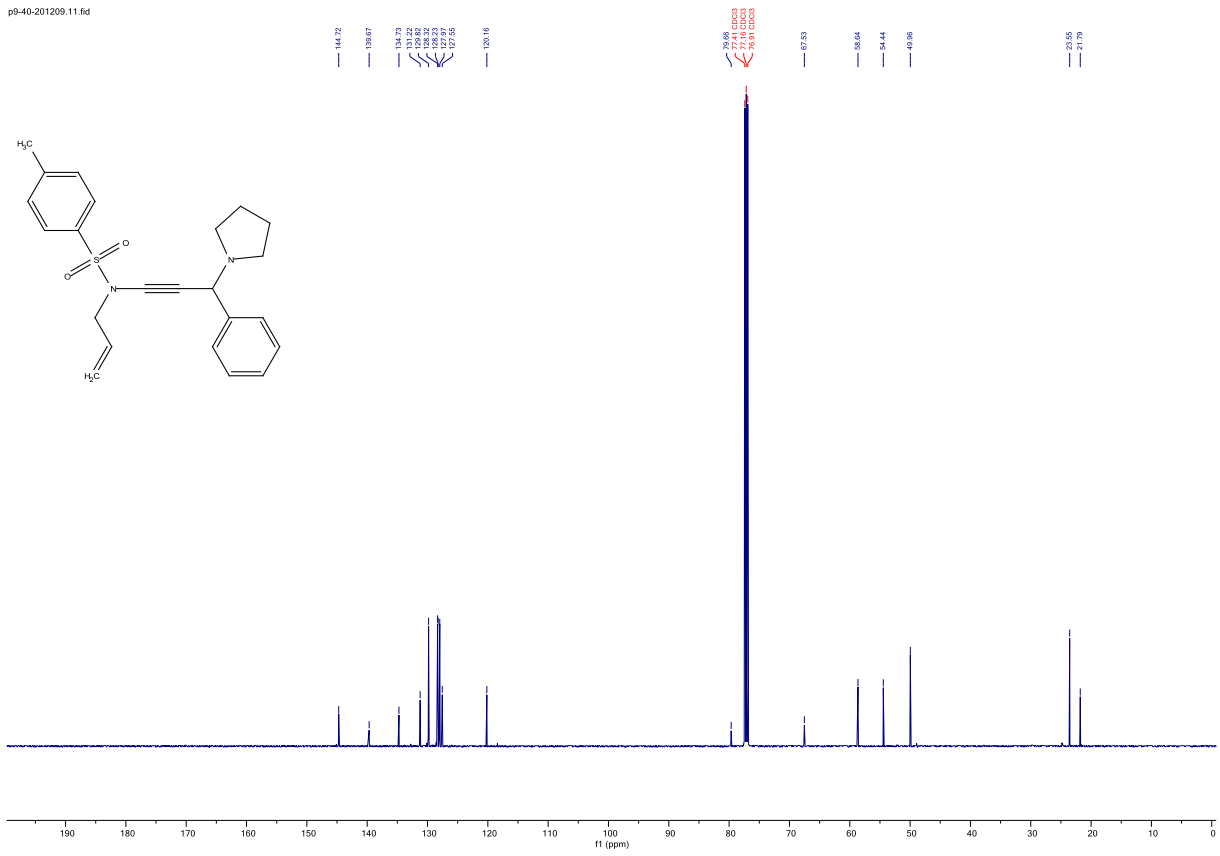

# DEPT135 NMR (126 MHz) in CDCl<sub>3</sub>

p9-40-201209.12.fid

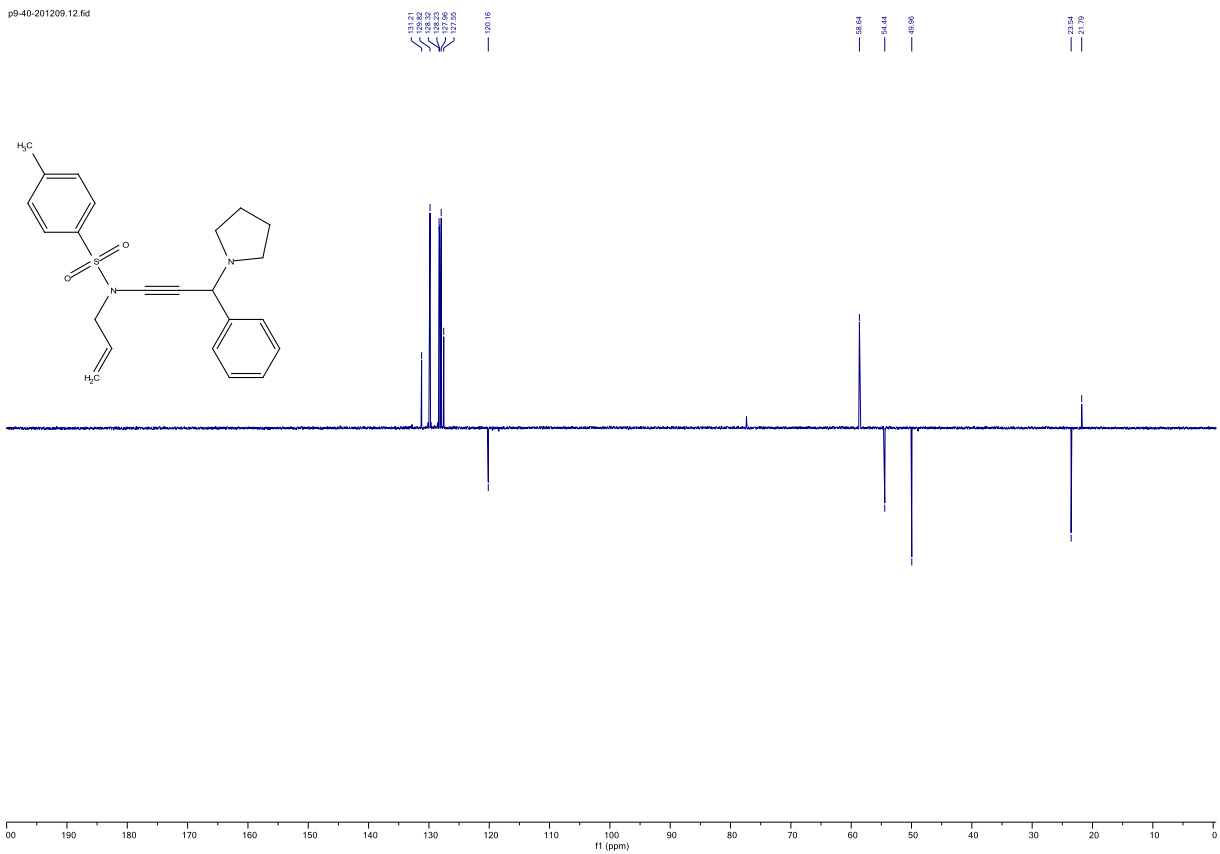





# DEPT135 NMR (126 MHz) in CDCl<sub>3</sub>

p8-41-201209.12.fid

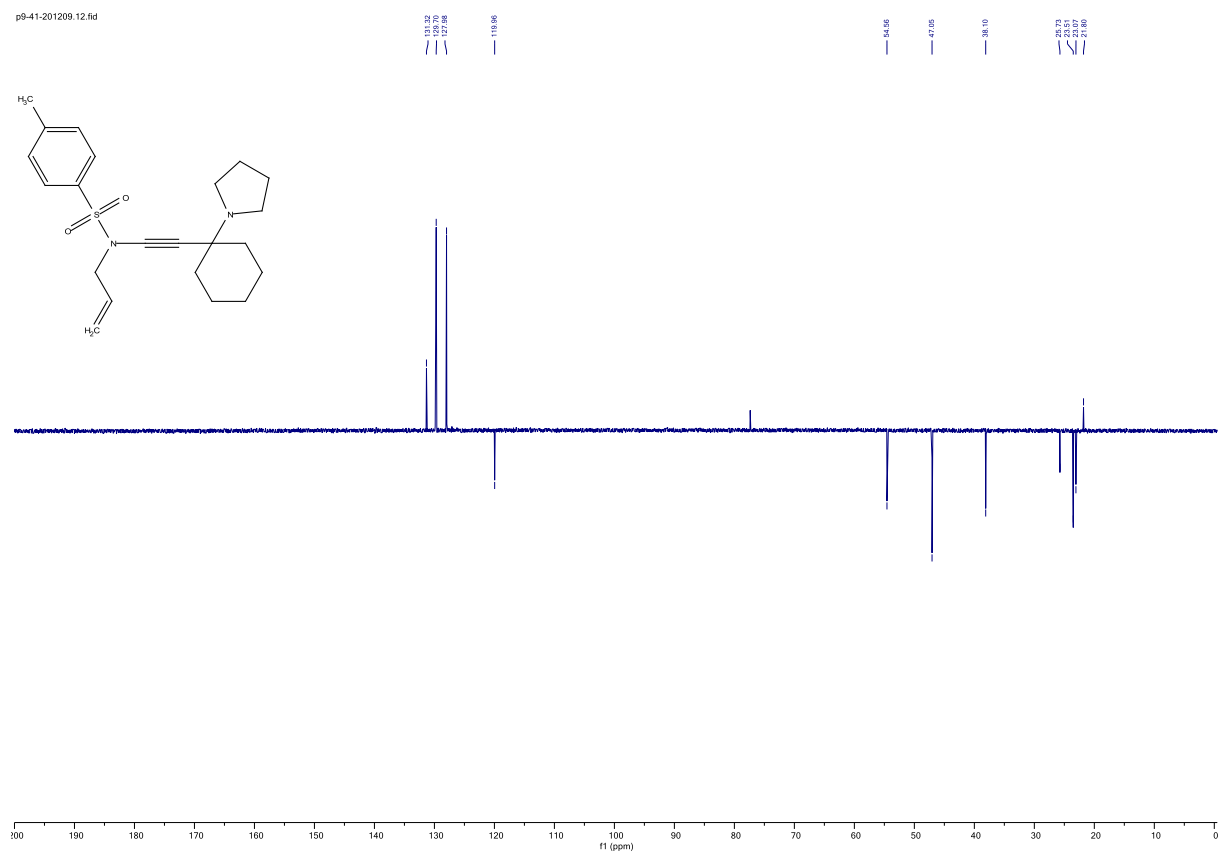

Methyl 4-((4-methyl-N-(3-phenyl-3-(pyrrolidin-1-yl)prop-1-yn-1-yl)phenyl)sulfonamido)-butanoate (6n)

<sup>1</sup>H NMR (500 MHz) in CDCl<sub>3</sub>

p9-32-210427.10.fid

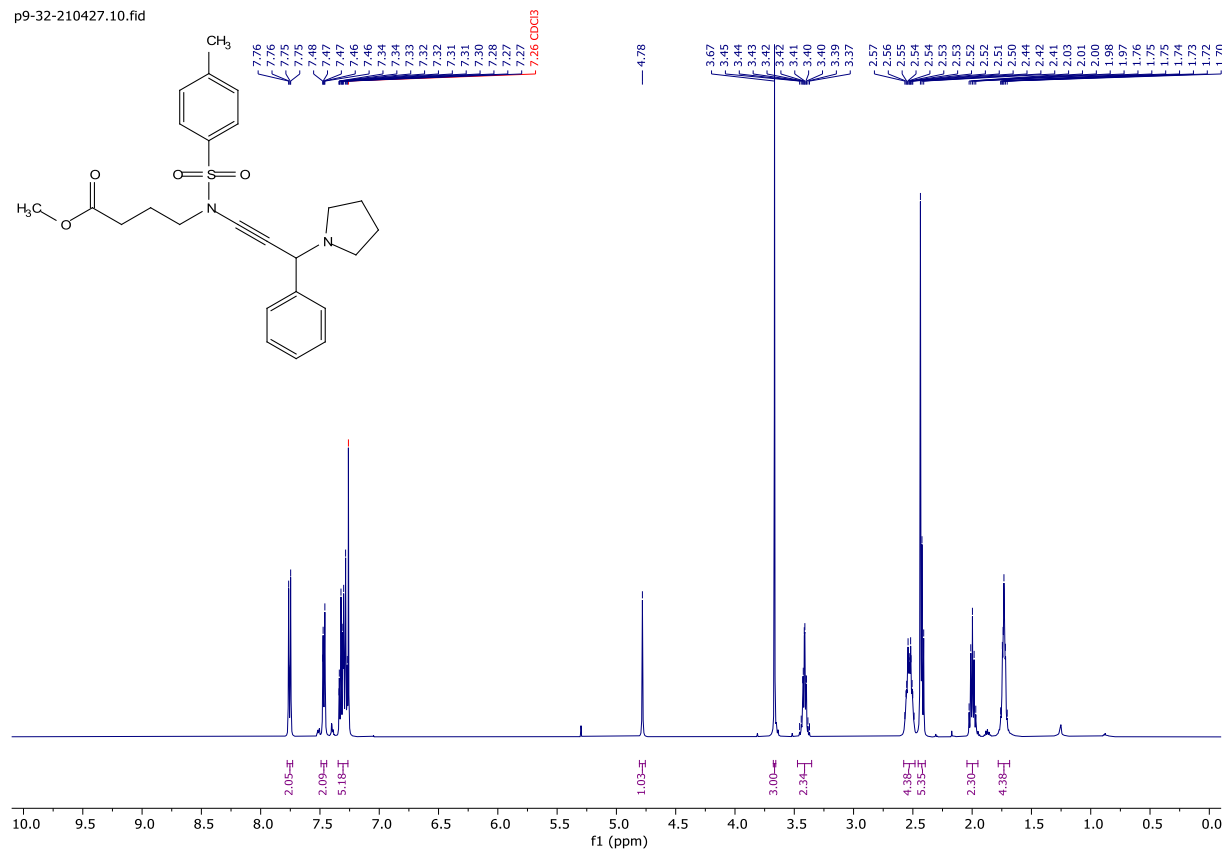

### <sup>13</sup>C NMR (126 MHz) in CDCl<sub>3</sub>

p9-32-210427.11.fid

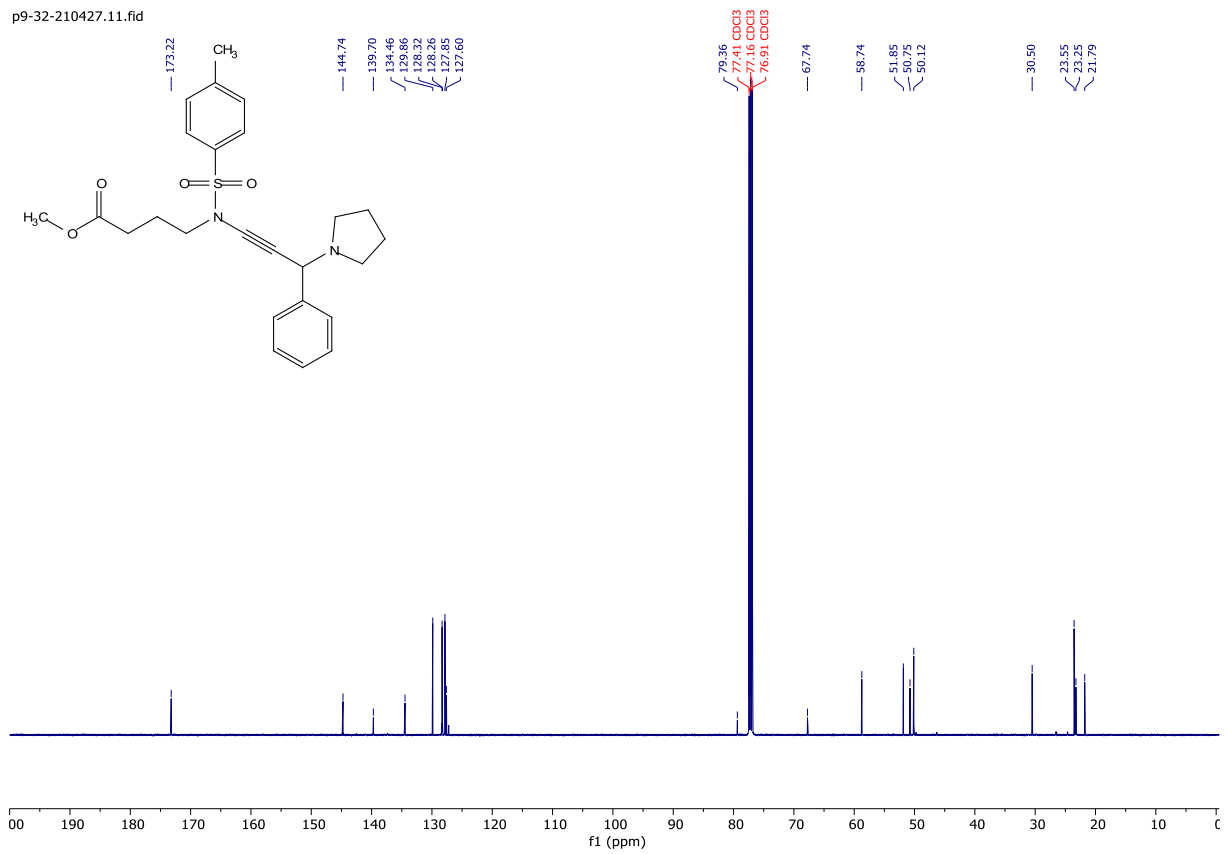

### DEPT135 NMR (126 MHz) in CDCl<sub>3</sub>

p9-32-210427.12.fid

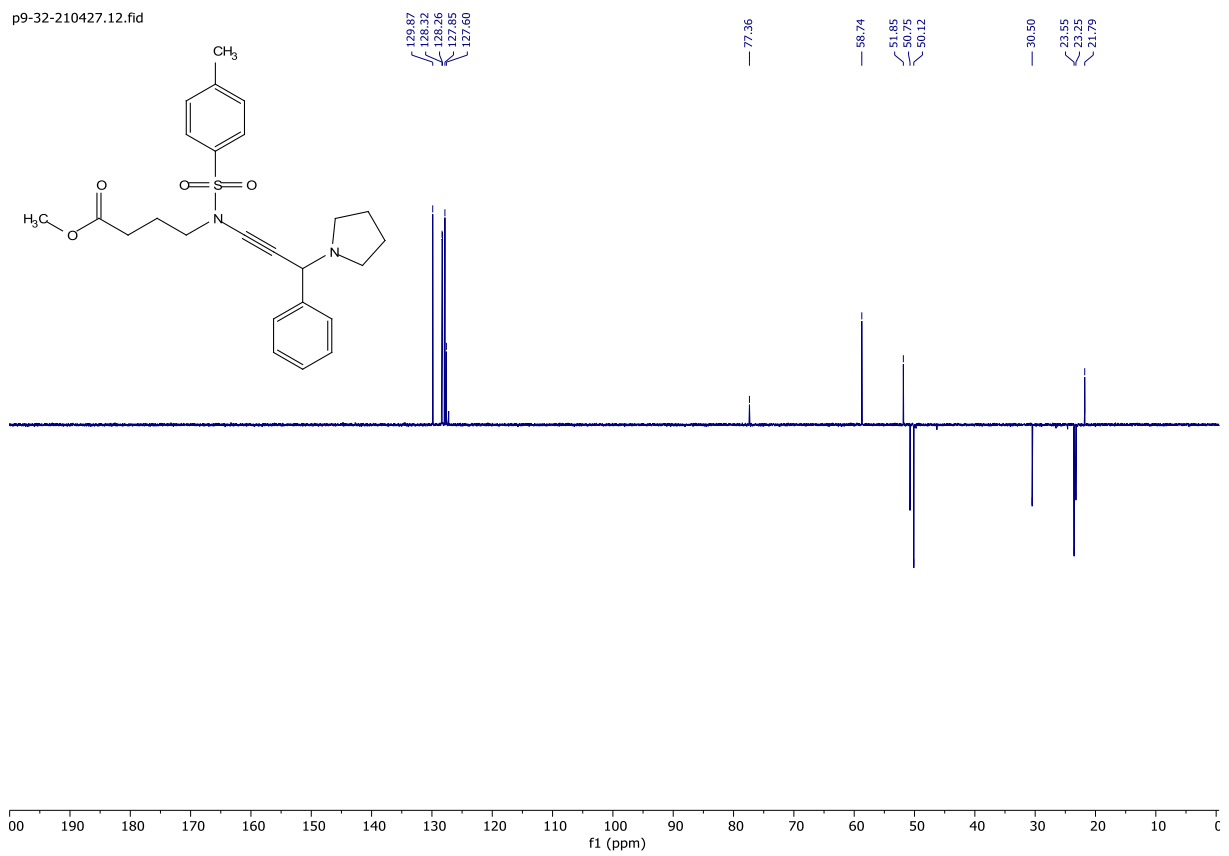

*N*-(2-(1*H*-Indol-3-yl)ethyl)-4-nitro-*N*-(3-phenyl-3-(pyrrolidin-1-yl)prop-1-yn-1-yl)benzenesulfonamide (**6o**)

<sup>1</sup>H NMR (500 MHz) in CDCl<sub>3</sub>

p6-20-211008.10.fid

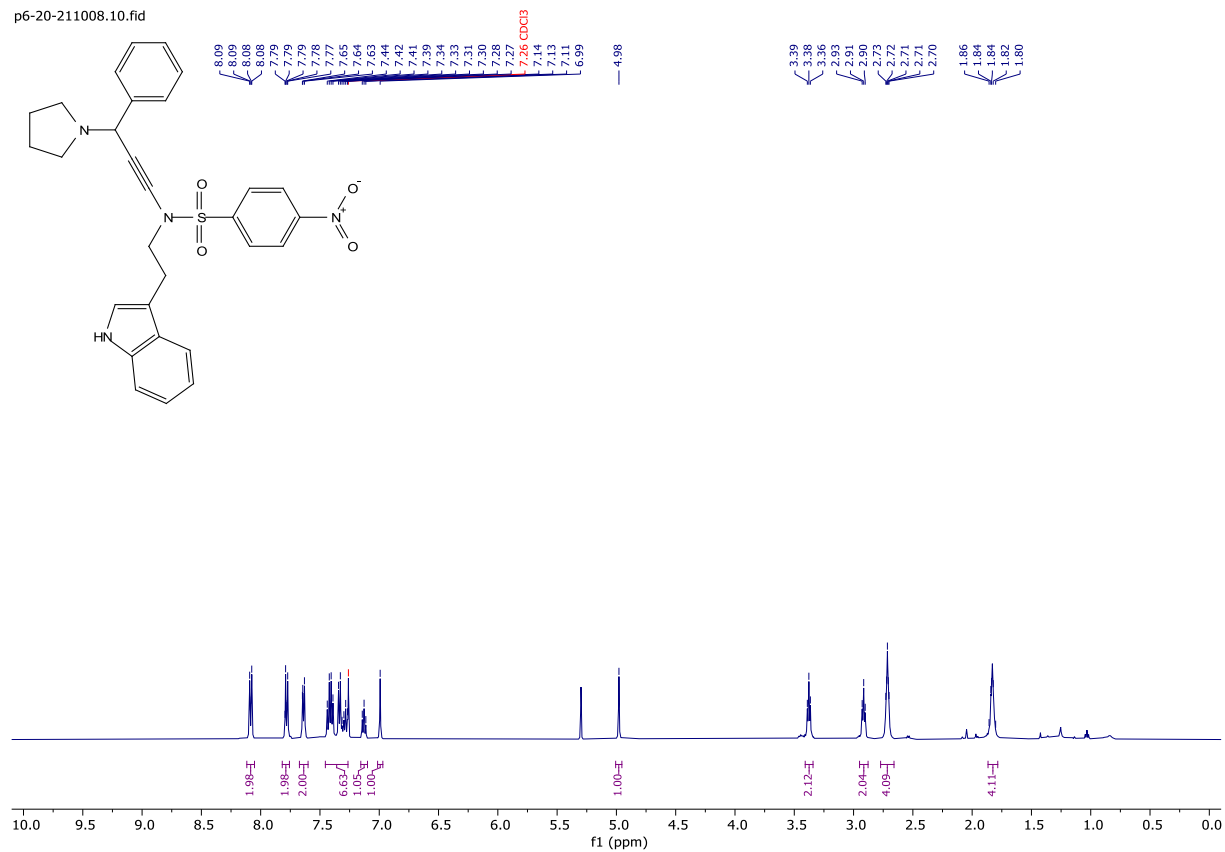

### <sup>13</sup>C NMR (126 MHz) in CDCl<sub>3</sub>

p6-20-211008.11.fid

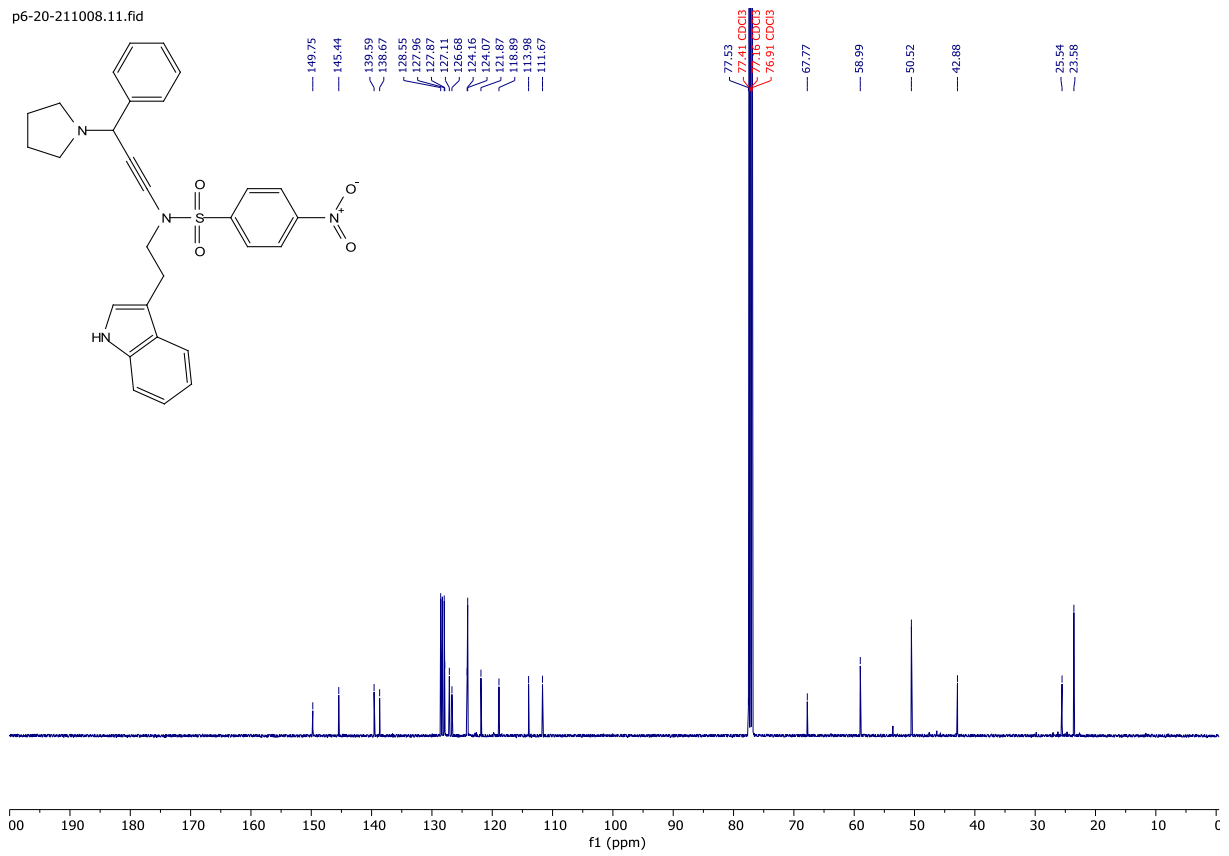

### DEPT135 NMR (126 MHz) in CDCl<sub>3</sub>

p6-20-211008.12.fid

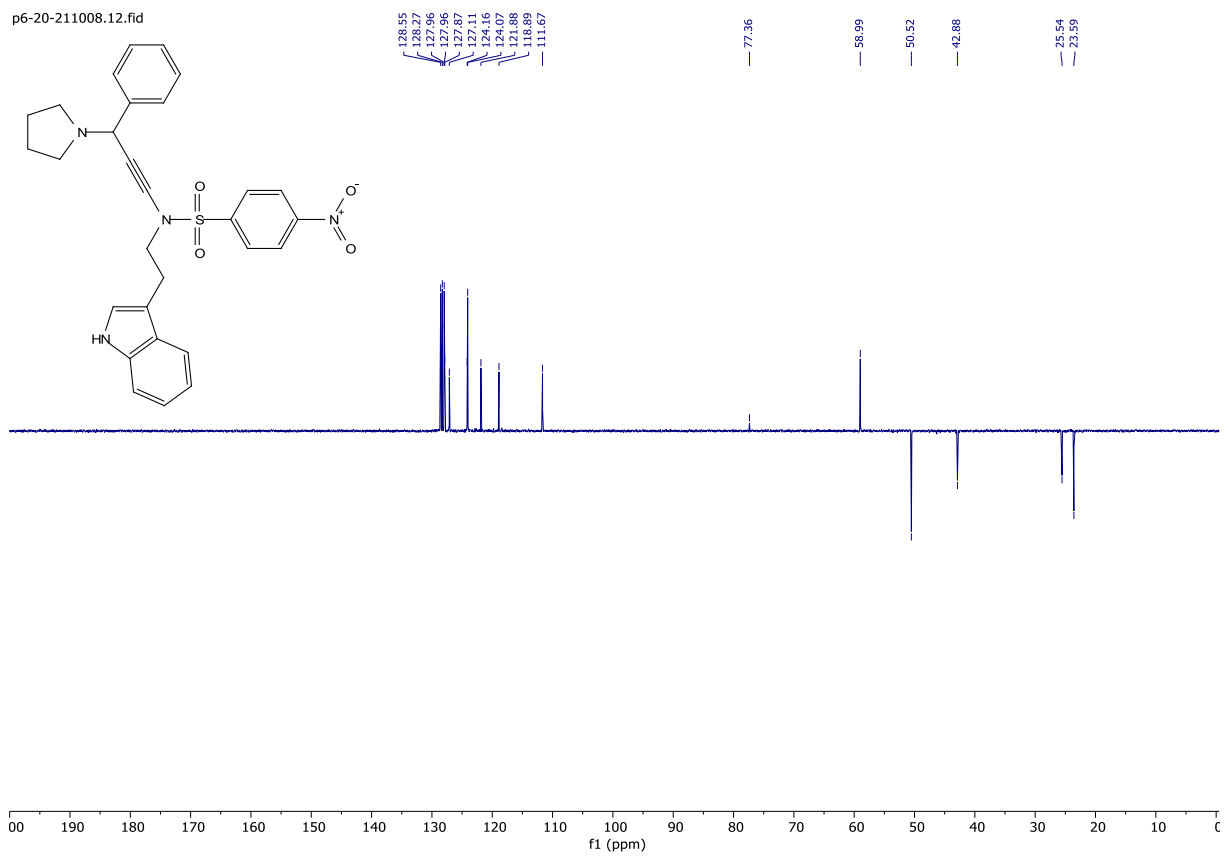

## VII. X-Ray Crystallographic Data for Compound 5d

### Crystal Structure Report for Compound 5d

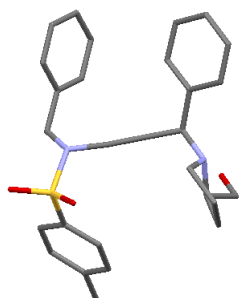

A specimen of  $C_{28}H_{30}N_2O_3S$ , approximate dimensions 0.100 mm x 0.200 mm x 0.200 mm, was used for the X-ray crystallographic analysis. The X-ray intensity data were measured ( $\lambda = 1.54178 \text{ \AA}$ ).

The integration of the data using an orthorhombic unit cell yielded a total of 52110 reflections to a maximum  $\theta$  angle of  $66.56^\circ$  (0.84  $\text{\AA}$  resolution), of which 8605 were independent (average redundancy 6.056, completeness = 99.8%,  $R_{\text{int}} = 4.96\%$ ,  $R_{\text{sig}} = 2.89\%$ ) and 8115 (94.31%) were greater than  $2\sigma(F^2)$ . The final cell constants of  $a = 10.6469(3) \text{ \AA}$ ,  $b = 15.8266(4) \text{ \AA}$ ,  $c = 28.9384(7) \text{ \AA}$ , volume =  $4876.2(2) \text{ \AA}^3$ , are based upon the refinement of the XYZ-centroids of reflections above  $20 \sigma(I)$ . The calculated minimum and maximum transmission coefficients (based on crystal size) are 0.6327 and 0.7528.

The structure was solved and refined using the Bruker SHELXTL Software Package, using the space group P 21 21 21, with  $Z = 8$  for the formula unit,  $C_{28}H_{30}N_2O_3S$ . The final anisotropic full-matrix least-squares refinement on  $F^2$  with 617 variables converged at  $R1 = 3.27\%$ , for the observed data and  $wR2 = 9.07\%$  for all data. The goodness-of-fit was 1.043. The largest peak in the final difference electron density synthesis was  $0.298 \text{ e}^-/\text{\AA}^3$  and the largest hole was  $-0.306 \text{ e}^-/\text{\AA}^3$  with an RMS deviation of  $0.039 \text{ e}^-/\text{\AA}^3$ . On the basis of the final model, the calculated density was  $1.293 \text{ g/cm}^3$  and  $F(000)$ , 2016  $e^-$ .

**Table 1. Sample and crystal data for Compound 5d.**

|                             |                              |                     |
|-----------------------------|------------------------------|---------------------|
| <b>Identification code</b>  | PPFS210322                   |                     |
| <b>Chemical formula</b>     | $C_{28}H_{30}N_2O_3S$        |                     |
| <b>Formula weight</b>       | 474.60 g/mol                 |                     |
| <b>Temperature</b>          | 120(2) K                     |                     |
| <b>Wavelength</b>           | 1.54178 $\text{\AA}$         |                     |
| <b>Crystal size</b>         | 0.100 x 0.200 x 0.200 mm     |                     |
| <b>Crystal system</b>       | orthorhombic                 |                     |
| <b>Space group</b>          | P 21 21 21                   |                     |
| <b>Unit cell dimensions</b> | $a = 10.6469(3) \text{ \AA}$ | $\alpha = 90^\circ$ |
|                             | $b = 15.8266(4) \text{ \AA}$ | $\beta = 90^\circ$  |
|                             | $c = 28.9384(7) \text{ \AA}$ | $\gamma = 90^\circ$ |
| <b>Volume</b>               | $4876.2(2) \text{ \AA}^3$    |                     |
| <b>Z</b>                    | 8                            |                     |

|                        |                         |
|------------------------|-------------------------|
| Density (calculated)   | 1.293 g/cm <sup>3</sup> |
| Absorption coefficient | 1.438 mm <sup>-1</sup>  |
| F(000)                 | 2016                    |

**Table 2. Data collection and structure refinement for Compound 5d.**

|                                   |                                                                                                                                                               |                              |       |
|-----------------------------------|---------------------------------------------------------------------------------------------------------------------------------------------------------------|------------------------------|-------|
| Theta range for data collection   | 3.05 to 66.56°                                                                                                                                                |                              |       |
| Index ranges                      | -12<=h<=12, -18<=k<=18, -34<=l<=34                                                                                                                            |                              |       |
| Reflections collected             | 52110                                                                                                                                                         |                              |       |
| Independent reflections           | 8605 [R(int) = 0.0496]                                                                                                                                        |                              |       |
| Max. and min. transmission        | 0.7528 and 0.6327                                                                                                                                             |                              |       |
| Structure solution technique      | direct methods                                                                                                                                                |                              |       |
| Structure solution program        | SHELXT 2014/5 (Sheldrick, 2014)                                                                                                                               |                              |       |
| Refinement method                 | Full-matrix least-squares on F <sup>2</sup>                                                                                                                   |                              |       |
| Refinement program                | SHELXL-2018/3 (Sheldrick, 2018)                                                                                                                               |                              |       |
| Function minimized                | $\Sigma w(F_o^2 - F_c^2)^2$                                                                                                                                   |                              |       |
| Data / restraints parameters      | / 8605 / 0 / 617                                                                                                                                              |                              |       |
| Goodness-of-fit on F <sup>2</sup> | 1.043                                                                                                                                                         |                              |       |
| $\Delta/\sigma_{\max}$            | 0.001                                                                                                                                                         |                              |       |
| Final R indices                   | 8115<br>I>2σ(I)                                                                                                                                               | data; R1 = 0.0327,<br>0.0886 | wR2 = |
|                                   | all data                                                                                                                                                      | R1 = 0.0356,<br>0.0907       | wR2 = |
| Weighting scheme                  | w=1/[σ <sup>2</sup> (F <sub>o</sub> <sup>2</sup> )+(0.0504P) <sup>2</sup> +1.3595P]<br>where P=(F <sub>o</sub> <sup>2</sup> +2F <sub>c</sub> <sup>2</sup> )/3 |                              |       |
| Absolute structure parameter      | 0.009(6)                                                                                                                                                      |                              |       |
| Largest diff. peak and hole       | 0.298 and -0.306 eÅ <sup>-3</sup>                                                                                                                             |                              |       |
| R.M.S. deviation from mean        | 0.039 eÅ <sup>-3</sup>                                                                                                                                        |                              |       |

**Table 3. Atomic coordinates and equivalent isotropic atomic displacement parameters (Å<sup>2</sup>) for Compound 5d.**

U(eq) is defined as one third of the trace of the orthogonalized U<sub>ij</sub> tensor.

|     | <b>x/a</b>  | <b>y/b</b>  | <b>z/c</b>  | <b>U(eq)</b> |
|-----|-------------|-------------|-------------|--------------|
| N1  | 0.0721(2)   | 0.95467(14) | 0.33391(7)  | 0.0209(5)    |
| C1  | 0.1048(3)   | 0.88946(16) | 0.36238(9)  | 0.0220(6)    |
| C2  | 0.1392(2)   | 0.83507(16) | 0.38791(9)  | 0.0232(5)    |
| C3  | 0.1843(2)   | 0.76751(16) | 0.41872(9)  | 0.0227(5)    |
| N2  | 0.1324(2)   | 0.68344(14) | 0.40711(8)  | 0.0267(5)    |
| C4  | 0.1700(4)   | 0.6509(2)   | 0.36127(11) | 0.0480(10)   |
| C5  | 0.0610(5)   | 0.5913(3)   | 0.34782(14) | 0.0694(14)   |
| C6  | 0.9654(4)   | 0.5959(2)   | 0.38704(14) | 0.0567(11)   |
| C7  | 0.9942(3)   | 0.67955(19) | 0.40926(11) | 0.0351(7)    |
| C8  | 0.2956(5)   | 0.6075(3)   | 0.36658(12) | 0.0581(12)   |
| O1  | 0.2929(3)   | 0.54916(16) | 0.40389(8)  | 0.0580(7)    |
| C9  | 0.1589(2)   | 0.78579(17) | 0.46964(9)  | 0.0220(5)    |
| C10 | 0.2258(3)   | 0.74001(19) | 0.50245(10) | 0.0274(6)    |
| C11 | 0.2076(3)   | 0.7546(2)   | 0.54911(10) | 0.0332(7)    |
| C12 | 0.1224(3)   | 0.8148(2)   | 0.56376(10) | 0.0341(7)    |
| C13 | 0.0551(3)   | 0.8609(2)   | 0.53133(10) | 0.0317(7)    |
| C14 | 0.0734(3)   | 0.84650(18) | 0.48440(10) | 0.0263(6)    |
| S1  | 0.12313(6)  | 0.94671(4)  | 0.27921(2)  | 0.01998(14)  |
| O2  | 0.24419(17) | 0.90861(12) | 0.28136(6)  | 0.0266(4)    |
| O3  | 0.10789(19) | 0.02931(12) | 0.25993(6)  | 0.0267(4)    |
| C15 | 0.0190(2)   | 0.87758(16) | 0.25083(9)  | 0.0184(5)    |
| C16 | 0.0480(3)   | 0.79173(17) | 0.24813(9)  | 0.0237(6)    |
| C17 | 0.9662(3)   | 0.73877(17) | 0.22473(10) | 0.0250(6)    |
| C18 | 0.8568(3)   | 0.76971(17) | 0.20447(9)  | 0.0238(6)    |
| C19 | 0.8289(3)   | 0.85533(17) | 0.20835(9)  | 0.0222(5)    |
| C20 | 0.9095(2)   | 0.90964(16) | 0.23175(8)  | 0.0209(5)    |
| C21 | 0.7703(3)   | 0.71155(19) | 0.17802(10) | 0.0307(7)    |
| C22 | 0.9452(3)   | 0.99383(18) | 0.34020(10) | 0.0254(6)    |
| C23 | 0.9210(3)   | 0.01563(17) | 0.38995(10) | 0.0235(6)    |
| C24 | 0.9841(3)   | 0.0806(2)   | 0.41166(12) | 0.0358(7)    |
| C25 | 0.9586(3)   | 0.1005(2)   | 0.45730(12) | 0.0446(9)    |
| C26 | 0.8673(3)   | 0.0569(2)   | 0.48155(10) | 0.0374(7)    |
| C27 | 0.8014(3)   | 0.9939(2)   | 0.45968(12) | 0.0383(8)    |
| C28 | 0.8280(3)   | 0.97301(19) | 0.41445(11) | 0.0316(6)    |
| N3  | 0.5702(2)   | 0.05202(15) | 0.33543(8)  | 0.0239(5)    |
| C29 | 0.5798(3)   | 0.12326(17) | 0.36258(10) | 0.0267(6)    |
| C30 | 0.5819(3)   | 0.18249(17) | 0.38830(10) | 0.0281(6)    |
| C31 | 0.5929(3)   | 0.25553(17) | 0.42049(9)  | 0.0252(5)    |
| N4  | 0.6806(2)   | 0.32020(14) | 0.40313(8)  | 0.0236(5)    |



|     | x/a         | y/b         | z/c         | U(eq)       |
|-----|-------------|-------------|-------------|-------------|
| C32 | 0.6318(3)   | 0.36880(18) | 0.36375(10) | 0.0292(6)   |
| C33 | 0.7501(3)   | 0.4096(2)   | 0.34297(12) | 0.0448(8)   |
| C34 | 0.8604(3)   | 0.3681(2)   | 0.36825(10) | 0.0341(7)   |
| C35 | 0.8040(3)   | 0.28963(18) | 0.38937(10) | 0.0300(6)   |
| C36 | 0.5360(3)   | 0.4352(2)   | 0.37666(12) | 0.0377(7)   |
| O4  | 0.4161(2)   | 0.39726(15) | 0.38694(10) | 0.0478(6)   |
| C37 | 0.6264(3)   | 0.22544(17) | 0.46931(9)  | 0.0260(6)   |
| C38 | 0.5639(3)   | 0.15599(18) | 0.48702(10) | 0.0295(6)   |
| C39 | 0.5806(3)   | 0.1320(2)   | 0.53262(11) | 0.0348(7)   |
| C40 | 0.6637(3)   | 0.1757(2)   | 0.56061(10) | 0.0349(7)   |
| C41 | 0.7291(3)   | 0.24352(19) | 0.54268(10) | 0.0294(6)   |
| C42 | 0.7116(3)   | 0.26815(18) | 0.49730(10) | 0.0284(6)   |
| S2  | 0.62823(6)  | 0.06031(4)  | 0.28192(2)  | 0.02555(16) |
| O5  | 0.74705(19) | 0.10139(14) | 0.28617(8)  | 0.0360(5)   |
| O6  | 0.6192(2)   | 0.97740(13) | 0.26254(8)  | 0.0353(5)   |
| C43 | 0.5268(3)   | 0.12766(17) | 0.25141(9)  | 0.0212(5)   |
| C44 | 0.5532(3)   | 0.21344(17) | 0.24919(9)  | 0.0248(6)   |
| C45 | 0.4707(3)   | 0.26630(17) | 0.22606(10) | 0.0268(6)   |
| C46 | 0.3627(3)   | 0.23492(17) | 0.20532(9)  | 0.0229(5)   |
| C47 | 0.3377(3)   | 0.14865(17) | 0.20844(9)  | 0.0249(6)   |
| C48 | 0.4188(3)   | 0.09470(17) | 0.23132(9)  | 0.0235(6)   |
| C49 | 0.2735(3)   | 0.29289(19) | 0.18036(9)  | 0.0301(7)   |
| C50 | 0.4480(3)   | 0.00569(17) | 0.33991(10) | 0.0266(6)   |
| C51 | 0.4201(3)   | 0.98539(17) | 0.38989(10) | 0.0247(6)   |
| C52 | 0.3268(3)   | 0.02885(18) | 0.41298(11) | 0.0307(6)   |
| C53 | 0.2974(3)   | 0.00987(19) | 0.45869(12) | 0.0326(7)   |
| C54 | 0.3631(3)   | 0.9468(2)   | 0.48145(11) | 0.0345(7)   |
| C55 | 0.4548(3)   | 0.9023(2)   | 0.45804(12) | 0.0408(8)   |
| C56 | 0.4833(3)   | 0.9214(2)   | 0.41267(11) | 0.0352(7)   |

**Table 4. Bond lengths (Å) for Compound 5d.**

|       |          |        |          |
|-------|----------|--------|----------|
| N1-C1 | 1.366(3) | N1-C22 | 1.498(3) |
| N1-S1 | 1.678(2) | C1-C2  | 1.192(4) |
| C2-C3 | 1.473(3) | C3-N2  | 1.479(3) |
| C3-C9 | 1.526(3) | C3-H3  | 1.0      |
| N2-C7 | 1.473(4) | N2-C4  | 1.478(4) |
| C4-C8 | 1.511(5) | C4-C5  | 1.546(6) |
| C4-H4 | 1.0      | C5-C6  | 1.527(7) |

|          |          |          |          |
|----------|----------|----------|----------|
| C5-H5A   | 0.99     | C5-H5B   | 0.99     |
| C6-C7    | 1.503(4) | C6-H6A   | 0.99     |
| C6-H6B   | 0.99     | C7-H7A   | 0.99     |
| C7-H7B   | 0.99     | C8-O1    | 1.421(4) |
| C8-H8A   | 0.99     | C8-H8B   | 0.99     |
| O1-H1A   | 0.84     | C9-C10   | 1.390(4) |
| C9-C14   | 1.391(4) | C10-C11  | 1.384(4) |
| C10-H10  | 0.95     | C11-C12  | 1.382(5) |
| C11-H11  | 0.95     | C12-C13  | 1.388(4) |
| C12-H12  | 0.95     | C13-C14  | 1.391(4) |
| C13-H13  | 0.95     | C14-H14  | 0.95     |
| S1-O2    | 1.424(2) | S1-O3    | 1.431(2) |
| S1-C15   | 1.761(3) | C15-C20  | 1.386(4) |
| C15-C16  | 1.396(4) | C16-C17  | 1.385(4) |
| C16-H16  | 0.95     | C17-C18  | 1.394(4) |
| C17-H17  | 0.95     | C18-C19  | 1.392(4) |
| C18-C21  | 1.510(4) | C19-C20  | 1.391(4) |
| C19-H19  | 0.95     | C20-H20  | 0.95     |
| C21-H21A | 0.98     | C21-H21B | 0.98     |
| C21-H21C | 0.98     | C22-C23  | 1.503(4) |
| C22-H22A | 0.99     | C22-H22B | 0.99     |
| C23-C24  | 1.379(4) | C23-C28  | 1.392(4) |
| C24-C25  | 1.385(5) | C24-H24  | 0.95     |
| C25-C26  | 1.383(5) | C25-H25  | 0.95     |
| C26-C27  | 1.375(5) | C26-H26  | 0.95     |
| C27-C28  | 1.379(4) | C27-H27  | 0.95     |
| C28-H28  | 0.95     | N3-C29   | 1.378(4) |
| N3-C50   | 1.499(4) | N3-S2    | 1.672(2) |
| C29-C30  | 1.197(4) | C30-C31  | 1.489(4) |
| C31-N4   | 1.473(3) | C31-C37  | 1.533(4) |
| C31-H31  | 1.0      | N4-C35   | 1.455(4) |
| N4-C32   | 1.470(4) | C32-C36  | 1.512(4) |
| C32-C33  | 1.537(4) | C32-H32  | 1.0      |
| C33-C34  | 1.531(5) | C33-H33A | 0.99     |
| C33-H33B | 0.99     | C34-C35  | 1.509(4) |
| C34-H34A | 0.99     | C34-H34B | 0.99     |
| C35-H35A | 0.99     | C35-H35B | 0.99     |
| C36-O4   | 1.442(4) | C36-H36A | 0.99     |
| C36-H36B | 0.99     | O4-H4A   | 0.84     |
| C37-C38  | 1.383(4) | C37-C42  | 1.392(4) |

|          |          |          |          |
|----------|----------|----------|----------|
| C38-C39  | 1.385(4) | C38-H38  | 0.95     |
| C39-C40  | 1.385(5) | C39-H39  | 0.95     |
| C40-C41  | 1.381(4) | C40-H40  | 0.95     |
| C41-C42  | 1.383(4) | C41-H41  | 0.95     |
| C42-H42  | 0.95     | S2-O5    | 1.428(2) |
| S2-O6    | 1.430(2) | S2-C43   | 1.755(3) |
| C43-C44  | 1.388(4) | C43-C48  | 1.390(4) |
| C44-C45  | 1.386(4) | C44-H44  | 0.95     |
| C45-C46  | 1.389(4) | C45-H45  | 0.95     |
| C46-C47  | 1.394(4) | C46-C49  | 1.506(4) |
| C47-C48  | 1.383(4) | C47-H47  | 0.95     |
| C48-H48  | 0.95     | C49-H49A | 0.98     |
| C49-H49B | 0.98     | C49-H49C | 0.98     |
| C50-C51  | 1.511(4) | C50-H50A | 0.99     |
| C50-H50B | 0.99     | C51-C52  | 1.381(4) |
| C51-C56  | 1.382(4) | C52-C53  | 1.392(5) |
| C52-H52  | 0.95     | C53-C54  | 1.386(4) |
| C53-H53  | 0.95     | C54-C55  | 1.382(5) |
| C54-H54  | 0.95     | C55-C56  | 1.381(5) |
| C55-H55  | 0.95     | C56-H56  | 0.95     |

**Table 5. Bond angles (°) for Compound 5d.**

|           |            |            |            |
|-----------|------------|------------|------------|
| C1-N1-C22 | 118.0(2)   | C1-N1-S1   | 115.46(18) |
| C22-N1-S1 | 115.95(17) | C2-C1-N1   | 176.3(3)   |
| C1-C2-C3  | 178.6(3)   | C2-C3-N2   | 113.2(2)   |
| C2-C3-C9  | 112.9(2)   | N2-C3-C9   | 108.9(2)   |
| C2-C3-H3  | 107.2      | N2-C3-H3   | 107.2      |
| C9-C3-H3  | 107.2      | C7-N2-C4   | 107.1(3)   |
| C7-N2-C3  | 113.6(2)   | C4-N2-C3   | 114.5(2)   |
| N2-C4-C8  | 107.9(3)   | N2-C4-C5   | 103.6(3)   |
| C8-C4-C5  | 114.3(3)   | N2-C4-H4   | 110.3      |
| C8-C4-H4  | 110.3      | C5-C4-H4   | 110.3      |
| C6-C5-C4  | 106.5(3)   | C6-C5-H5A  | 110.4      |
| C4-C5-H5A | 110.4      | C6-C5-H5B  | 110.4      |
| C4-C5-H5B | 110.4      | H5A-C5-H5B | 108.6      |
| C7-C6-C5  | 102.9(3)   | C7-C6-H6A  | 111.2      |
| C5-C6-H6A | 111.2      | C7-C6-H6B  | 111.2      |
| C5-C6-H6B | 111.2      | H6A-C6-H6B | 109.1      |
| N2-C7-C6  | 102.9(3)   | N2-C7-H7A  | 111.2      |

|               |            |               |            |
|---------------|------------|---------------|------------|
| C6-C7-H7A     | 111.2      | N2-C7-H7B     | 111.2      |
| C6-C7-H7B     | 111.2      | H7A-C7-H7B    | 109.1      |
| O1-C8-C4      | 110.8(3)   | O1-C8-H8A     | 109.5      |
| C4-C8-H8A     | 109.5      | O1-C8-H8B     | 109.5      |
| C4-C8-H8B     | 109.5      | H8A-C8-H8B    | 108.1      |
| C8-O1-H1A     | 109.5      | C10-C9-C14    | 119.1(3)   |
| C10-C9-C3     | 118.0(2)   | C14-C9-C3     | 122.9(2)   |
| C11-C10-C9    | 120.5(3)   | C11-C10-H10   | 119.7      |
| C9-C10-H10    | 119.7      | C12-C11-C10   | 120.4(3)   |
| C12-C11-H11   | 119.8      | C10-C11-H11   | 119.8      |
| C11-C12-C13   | 119.6(3)   | C11-C12-H12   | 120.2      |
| C13-C12-H12   | 120.2      | C12-C13-C14   | 120.1(3)   |
| C12-C13-H13   | 119.9      | C14-C13-H13   | 119.9      |
| C13-C14-C9    | 120.3(3)   | C13-C14-H14   | 119.9      |
| C9-C14-H14    | 119.9      | O2-S1-O3      | 120.43(12) |
| O2-S1-N1      | 106.46(11) | O3-S1-N1      | 105.23(11) |
| O2-S1-C15     | 109.08(12) | O3-S1-C15     | 108.33(12) |
| N1-S1-C15     | 106.44(12) | C20-C15-C16   | 121.3(2)   |
| C20-C15-S1    | 119.19(19) | C16-C15-S1    | 119.5(2)   |
| C17-C16-C15   | 118.5(3)   | C17-C16-H16   | 120.7      |
| C15-C16-H16   | 120.7      | C16-C17-C18   | 121.2(3)   |
| C16-C17-H17   | 119.4      | C18-C17-H17   | 119.4      |
| C19-C18-C17   | 119.1(2)   | C19-C18-C21   | 120.3(3)   |
| C17-C18-C21   | 120.6(3)   | C20-C19-C18   | 120.6(3)   |
| C20-C19-H19   | 119.7      | C18-C19-H19   | 119.7      |
| C15-C20-C19   | 119.1(2)   | C15-C20-H20   | 120.4      |
| C19-C20-H20   | 120.4      | C18-C21-H21A  | 109.5      |
| C18-C21-H21B  | 109.5      | H21A-C21-H21B | 109.5      |
| C18-C21-H21C  | 109.5      | H21A-C21-H21C | 109.5      |
| H21B-C21-H21C | 109.5      | N1-C22-C23    | 111.5(2)   |
| N1-C22-H22A   | 109.3      | C23-C22-H22A  | 109.3      |
| N1-C22-H22B   | 109.3      | C23-C22-H22B  | 109.3      |
| H22A-C22-H22B | 108.0      | C24-C23-C28   | 118.4(3)   |
| C24-C23-C22   | 121.6(3)   | C28-C23-C22   | 119.9(3)   |
| C23-C24-C25   | 120.6(3)   | C23-C24-H24   | 119.7      |
| C25-C24-H24   | 119.7      | C26-C25-C24   | 120.6(3)   |
| C26-C25-H25   | 119.7      | C24-C25-H25   | 119.7      |
| C27-C26-C25   | 119.2(3)   | C27-C26-H26   | 120.4      |
| C25-C26-H26   | 120.4      | C26-C27-C28   | 120.4(3)   |
| C26-C27-H27   | 119.8      | C28-C27-H27   | 119.8      |

|               |            |              |            |
|---------------|------------|--------------|------------|
| C27-C28-C23   | 120.9(3)   | C27-C28-H28  | 119.6      |
| C23-C28-H28   | 119.6      | C29-N3-C50   | 114.6(2)   |
| C29-N3-S2     | 115.85(19) | C50-N3-S2    | 116.05(18) |
| C30-C29-N3    | 175.2(3)   | C29-C30-C31  | 176.5(3)   |
| N4-C31-C30    | 112.1(2)   | N4-C31-C37   | 112.5(2)   |
| C30-C31-C37   | 110.7(2)   | N4-C31-H31   | 107.1      |
| C30-C31-H31   | 107.1      | C37-C31-H31  | 107.1      |
| C35-N4-C32    | 106.3(2)   | C35-N4-C31   | 115.7(2)   |
| C32-N4-C31    | 113.8(2)   | N4-C32-C36   | 114.2(2)   |
| N4-C32-C33    | 103.5(2)   | C36-C32-C33  | 111.0(3)   |
| N4-C32-H32    | 109.3      | C36-C32-H32  | 109.3      |
| C33-C32-H32   | 109.3      | C34-C33-C32  | 105.1(2)   |
| C34-C33-H33A  | 110.7      | C32-C33-H33A | 110.7      |
| C34-C33-H33B  | 110.7      | C32-C33-H33B | 110.7      |
| H33A-C33-H33B | 108.8      | C35-C34-C33  | 104.0(3)   |
| C35-C34-H34A  | 111.0      | C33-C34-H34A | 111.0      |
| C35-C34-H34B  | 111.0      | C33-C34-H34B | 111.0      |
| H34A-C34-H34B | 109.0      | N4-C35-C34   | 101.3(2)   |
| N4-C35-H35A   | 111.5      | C34-C35-H35A | 111.5      |
| N4-C35-H35B   | 111.5      | C34-C35-H35B | 111.5      |
| H35A-C35-H35B | 109.3      | O4-C36-C32   | 111.0(3)   |
| O4-C36-H36A   | 109.4      | C32-C36-H36A | 109.4      |
| O4-C36-H36B   | 109.4      | C32-C36-H36B | 109.4      |
| H36A-C36-H36B | 108.0      | C36-O4-H4A   | 109.5      |
| C38-C37-C42   | 118.9(3)   | C38-C37-C31  | 118.5(3)   |
| C42-C37-C31   | 122.5(2)   | C37-C38-C39  | 120.6(3)   |
| C37-C38-H38   | 119.7      | C39-C38-H38  | 119.7      |
| C38-C39-C40   | 120.1(3)   | C38-C39-H39  | 119.9      |
| C40-C39-H39   | 119.9      | C41-C40-C39  | 119.4(3)   |
| C41-C40-H40   | 120.3      | C39-C40-H40  | 120.3      |
| C40-C41-C42   | 120.5(3)   | C40-C41-H41  | 119.7      |
| C42-C41-H41   | 119.7      | C41-C42-C37  | 120.3(3)   |
| C41-C42-H42   | 119.9      | C37-C42-H42  | 119.9      |
| O5-S2-O6      | 120.76(13) | O5-S2-N3     | 106.46(13) |
| O6-S2-N3      | 105.43(13) | O5-S2-C43    | 108.17(13) |
| O6-S2-C43     | 108.56(13) | N3-S2-C43    | 106.63(12) |
| C44-C43-C48   | 121.0(2)   | C44-C43-S2   | 119.5(2)   |
| C48-C43-S2    | 119.4(2)   | C45-C44-C43  | 119.0(3)   |
| C45-C44-H44   | 120.5      | C43-C44-H44  | 120.5      |
| C44-C45-C46   | 121.2(3)   | C44-C45-H45  | 119.4      |

|               |          |               |          |
|---------------|----------|---------------|----------|
| C46-C45-H45   | 119.4    | C45-C46-C47   | 118.7(3) |
| C45-C46-C49   | 120.8(2) | C47-C46-C49   | 120.5(3) |
| C48-C47-C46   | 121.1(3) | C48-C47-H47   | 119.5    |
| C46-C47-H47   | 119.5    | C47-C48-C43   | 119.0(2) |
| C47-C48-H48   | 120.5    | C43-C48-H48   | 120.5    |
| C46-C49-H49A  | 109.5    | C46-C49-H49B  | 109.5    |
| H49A-C49-H49B | 109.5    | C46-C49-H49C  | 109.5    |
| H49A-C49-H49C | 109.5    | H49B-C49-H49C | 109.5    |
| N3-C50-C51    | 110.9(2) | N3-C50-H50A   | 109.5    |
| C51-C50-H50A  | 109.5    | N3-C50-H50B   | 109.5    |
| C51-C50-H50B  | 109.5    | H50A-C50-H50B | 108.0    |
| C52-C51-C56   | 118.9(3) | C52-C51-C50   | 119.9(3) |
| C56-C51-C50   | 121.1(3) | C51-C52-C53   | 120.9(3) |
| C51-C52-H52   | 119.5    | C53-C52-H52   | 119.5    |
| C54-C53-C52   | 119.6(3) | C54-C53-H53   | 120.2    |
| C52-C53-H53   | 120.2    | C55-C54-C53   | 119.4(3) |
| C55-C54-H54   | 120.3    | C53-C54-H54   | 120.3    |
| C56-C55-C54   | 120.6(3) | C56-C55-H55   | 119.7    |
| C54-C55-H55   | 119.7    | C55-C56-C51   | 120.5(3) |
| C55-C56-H56   | 119.8    | C51-C56-H56   | 119.8    |

**Table 6. Torsion angles (°) for Compound 5d.**

|                 |             |                 |            |
|-----------------|-------------|-----------------|------------|
| C2-C3-N2-C7     | -59.5(3)    | C9-C3-N2-C7     | 67.0(3)    |
| C2-C3-N2-C4     | 64.1(3)     | C9-C3-N2-C4     | -169.5(2)  |
| C7-N2-C4-C8     | -147.8(3)   | C3-N2-C4-C8     | 85.2(3)    |
| C7-N2-C4-C5     | -26.2(3)    | C3-N2-C4-C5     | -153.2(3)  |
| N2-C4-C5-C6     | 1.5(4)      | C8-C4-C5-C6     | 118.7(3)   |
| C4-C5-C6-C7     | 22.6(4)     | C4-N2-C7-C6     | 41.3(3)    |
| C3-N2-C7-C6     | 168.8(2)    | C5-C6-C7-N2     | -38.3(3)   |
| N2-C4-C8-O1     | 50.1(4)     | C5-C4-C8-O1     | -64.5(4)   |
| C2-C3-C9-C10    | -162.6(2)   | N2-C3-C9-C10    | 70.8(3)    |
| C2-C3-C9-C14    | 16.7(4)     | N2-C3-C9-C14    | -109.9(3)  |
| C14-C9-C10-C11  | 0.0(4)      | C3-C9-C10-C11   | 179.3(3)   |
| C9-C10-C11-C12  | 0.2(5)      | C10-C11-C12-C13 | -0.3(5)    |
| C11-C12-C13-C14 | 0.1(5)      | C12-C13-C14-C9  | 0.1(5)     |
| C10-C9-C14-C13  | -0.1(4)     | C3-C9-C14-C13   | -179.4(3)  |
| C1-N1-S1-O2     | -36.2(2)    | C22-N1-S1-O2    | 179.73(19) |
| C1-N1-S1-O3     | -165.10(19) | C22-N1-S1-O3    | 50.8(2)    |

|                 |           |                 |                 |
|-----------------|-----------|-----------------|-----------------|
| C1-N1-S1-C15    | 80.1(2)   | C22-N1-S1-C15   | -64.0(2)        |
| O2-S1-C15-C20   | -159.7(2) | O3-S1-C15-C20   | -27.0(2)        |
| N1-S1-C15-C20   | 85.8(2)   | O2-S1-C15-C16   | 20.5(2)         |
| O3-S1-C15-C16   | 153.3(2)  | N1-S1-C15-C16   | -94.0(2)        |
| C20-C15-C16-C17 | 1.7(4)    | S1-C15-C16-C17  | -178.5(2)       |
| C15-C16-C17-C18 | -0.4(4)   | C16-C17-C18-C19 | -0.7(4)         |
| C16-C17-C18-C21 | 178.4(3)  | C17-C18-C19-C20 | 0.6(4)          |
| C21-C18-C19-C20 | -178.5(2) | C16-C15-C20-C19 | -1.8(4)         |
| S1-C15-C20-C19  | 178.4(2)  | C18-C19-C20-C15 | 0.7(4)          |
| C1-N1-C22-C23   | 49.6(3)   | S1-N1-C22-C23   | -<br>167.27(19) |
| N1-C22-C23-C24  | 70.3(3)   | N1-C22-C23-C28  | -113.4(3)       |
| C28-C23-C24-C25 | 2.5(5)    | C22-C23-C24-C25 | 178.8(3)        |
| C23-C24-C25-C26 | -1.6(5)   | C24-C25-C26-C27 | -0.4(5)         |
| C25-C26-C27-C28 | 1.5(5)    | C26-C27-C28-C23 | -0.5(5)         |
| C24-C23-C28-C27 | -1.4(5)   | C22-C23-C28-C27 | -177.9(3)       |
| C30-C31-N4-C35  | -51.4(3)  | C37-C31-N4-C35  | 74.2(3)         |
| C30-C31-N4-C32  | 72.2(3)   | C37-C31-N4-C32  | -162.2(2)       |
| C35-N4-C32-C36  | -154.9(2) | C31-N4-C32-C36  | 76.5(3)         |
| C35-N4-C32-C33  | -34.1(3)  | C31-N4-C32-C33  | -162.7(2)       |
| N4-C32-C33-C34  | 9.1(3)    | C36-C32-C33-C34 | 132.1(3)        |
| C32-C33-C34-C35 | 17.6(3)   | C32-N4-C35-C34  | 45.5(3)         |
| C31-N4-C35-C34  | 173.0(2)  | C33-C34-C35-N4  | -37.9(3)        |
| N4-C32-C36-O4   | -75.5(3)  | C33-C32-C36-O4  | 167.9(3)        |
| N4-C31-C37-C38  | -170.3(2) | C30-C31-C37-C38 | -44.0(3)        |
| N4-C31-C37-C42  | 13.5(4)   | C30-C31-C37-C42 | 139.8(3)        |
| C42-C37-C38-C39 | 3.5(4)    | C31-C37-C38-C39 | -172.9(3)       |
| C37-C38-C39-C40 | -2.3(5)   | C38-C39-C40-C41 | 0.3(5)          |
| C39-C40-C41-C42 | 0.4(4)    | C40-C41-C42-C37 | 0.9(4)          |
| C38-C37-C42-C41 | -2.8(4)   | C31-C37-C42-C41 | 173.4(3)        |
| C29-N3-S2-O5    | 44.9(2)   | C50-N3-S2-O5    | -<br>176.43(19) |

|                 |           |                 |            |
|-----------------|-----------|-----------------|------------|
| C29-N3-S2-O6    | 174.3(2)  | C50-N3-S2-O6    | -47.0(2)   |
| C29-N3-S2-C43   | -70.4(2)  | C50-N3-S2-C43   | 68.3(2)    |
| O5-S2-C43-C44   | -20.5(3)  | O6-S2-C43-C44   | -153.2(2)  |
| N3-S2-C43-C44   | 93.7(2)   | O5-S2-C43-C48   | 161.9(2)   |
| O6-S2-C43-C48   | 29.2(3)   | N3-S2-C43-C48   | -83.9(2)   |
| C48-C43-C44-C45 | -0.8(4)   | S2-C43-C44-C45  | -178.3(2)  |
| C43-C44-C45-C46 | 0.1(4)    | C44-C45-C46-C47 | 0.5(4)     |
| C44-C45-C46-C49 | 179.8(3)  | C45-C46-C47-C48 | -0.6(4)    |
| C49-C46-C47-C48 | -179.9(3) | C46-C47-C48-C43 | 0.0(4)     |
| C44-C43-C48-C47 | 0.7(4)    | S2-C43-C48-C47  | 178.2(2)   |
| C29-N3-C50-C51  | -53.5(3)  | S2-N3-C50-C51   | 167.32(19) |
| N3-C50-C51-C52  | 107.6(3)  | N3-C50-C51-C56  | -75.0(3)   |
| C56-C51-C52-C53 | 1.0(4)    | C50-C51-C52-C53 | 178.4(3)   |
| C51-C52-C53-C54 | 0.3(5)    | C52-C53-C54-C55 | -1.5(5)    |
| C53-C54-C55-C56 | 1.4(5)    | C54-C55-C56-C51 | -0.1(5)    |
| C52-C51-C56-C55 | -1.1(5)   | C50-C51-C56-C55 | -178.5(3)  |

**Table 7. Anisotropic atomic displacement parameters ( $\text{\AA}^2$ ) for Compound 5d.**

The anisotropic atomic displacement factor exponent takes the form:  $-2\pi^2 [ h^2 a^{*2} U_{11} + \dots + 2 h k a^* b^* U_{12} ]$

|    | $U_{11}$   | $U_{22}$   | $U_{33}$   | $U_{23}$    | $U_{13}$    | $U_{12}$    |
|----|------------|------------|------------|-------------|-------------|-------------|
| N1 | 0.0250(11) | 0.0185(11) | 0.0192(10) | -0.0003(9)  | -0.0037(9)  | 0.0021(9)   |
| C1 | 0.0272(14) | 0.0193(12) | 0.0194(12) | -0.0021(10) | -0.0024(10) | -0.0012(11) |
| C2 | 0.0249(14) | 0.0230(13) | 0.0218(12) | -0.0007(11) | -0.0006(11) | 0.0001(10)  |
| C3 | 0.0237(13) | 0.0222(12) | 0.0223(12) | 0.0004(10)  | -0.0019(10) | 0.0020(10)  |
| N2 | 0.0376(13) | 0.0191(11) | 0.0235(11) | -0.0018(9)  | -0.0040(10) | 0.0083(10)  |
| C4 | 0.091(3)   | 0.0315(17) | 0.0212(14) | -0.0029(13) | -0.0046(16) | 0.0236(18)  |
| C5 | 0.118(4)   | 0.041(2)   | 0.049(2)   | -0.0200(18) | -0.039(3)   | 0.012(2)    |
| C6 | 0.084(3)   | 0.0327(18) | 0.054(2)   | -0.0015(17) | -0.030(2)   | -0.0099(19) |
| C7 | 0.0379(17) | 0.0262(15) | 0.0411(16) | 0.0040(13)  | -0.0124(14) | -0.0060(12) |
| C8 | 0.088(3)   | 0.049(2)   | 0.0374(18) | 0.0047(16)  | 0.022(2)    | 0.038(2)    |
| O1 | 0.083(2)   | 0.0495(15) | 0.0410(12) | 0.0078(11)  | 0.0141(13)  | 0.0401(14)  |



|     | $U_{11}$   | $U_{22}$   | $U_{33}$   | $U_{23}$    | $U_{13}$    | $U_{12}$    |
|-----|------------|------------|------------|-------------|-------------|-------------|
| C9  | 0.0234(13) | 0.0204(12) | 0.0224(12) | 0.0011(10)  | -0.0037(10) | -0.0038(10) |
| C10 | 0.0278(15) | 0.0271(14) | 0.0273(13) | 0.0045(12)  | -0.0040(11) | 0.0010(12)  |
| C11 | 0.0364(16) | 0.0379(17) | 0.0252(13) | 0.0069(13)  | -0.0082(12) | -0.0051(13) |
| C12 | 0.0400(16) | 0.0404(16) | 0.0219(13) | -0.0026(12) | -0.0002(13) | -0.0081(14) |
| C13 | 0.0307(16) | 0.0325(16) | 0.0319(15) | -0.0064(13) | 0.0006(12)  | 0.0002(12)  |
| C14 | 0.0266(14) | 0.0263(14) | 0.0259(13) | -0.0011(11) | -0.0047(11) | 0.0017(11)  |
| S1  | 0.0218(3)  | 0.0194(3)  | 0.0188(3)  | -0.0005(2)  | -0.0014(2)  | -0.0042(2)  |
| O2  | 0.0206(9)  | 0.0334(10) | 0.0259(9)  | -0.0039(8)  | -0.0016(8)  | -0.0030(8)  |
| O3  | 0.0368(11) | 0.0195(9)  | 0.0239(9)  | 0.0022(8)   | -0.0029(8)  | -0.0092(8)  |
| C15 | 0.0223(13) | 0.0167(12) | 0.0162(12) | -0.0008(10) | -0.0007(10) | -0.0046(10) |
| C16 | 0.0268(14) | 0.0212(13) | 0.0230(13) | 0.0017(11)  | -0.0035(11) | 0.0007(11)  |
| C17 | 0.0324(14) | 0.0165(12) | 0.0261(13) | -0.0002(11) | 0.0009(11)  | -0.0012(11) |
| C18 | 0.0286(14) | 0.0258(13) | 0.0169(12) | -0.0016(10) | 0.0021(10)  | -0.0085(11) |
| C19 | 0.0213(13) | 0.0270(14) | 0.0183(12) | 0.0006(11)  | -0.0013(10) | -0.0014(11) |
| C20 | 0.0248(14) | 0.0192(12) | 0.0188(12) | 0.0003(10)  | 0.0008(10)  | 0.0002(10)  |
| C21 | 0.0362(16) | 0.0322(16) | 0.0237(13) | -0.0053(12) | -0.0013(12) | -0.0123(13) |
| C22 | 0.0223(15) | 0.0276(15) | 0.0262(15) | 0.0015(11)  | -0.0039(11) | 0.0047(11)  |
| C23 | 0.0202(13) | 0.0219(13) | 0.0285(14) | -0.0018(12) | -0.0020(11) | 0.0053(11)  |
| C24 | 0.0249(15) | 0.0374(17) | 0.0451(18) | -0.0136(15) | 0.0046(13)  | -0.0069(13) |
| C25 | 0.0288(16) | 0.057(2)   | 0.0476(19) | -0.0287(18) | -0.0041(15) | -0.0007(16) |
| C26 | 0.0333(16) | 0.0506(19) | 0.0282(15) | -0.0106(14) | -0.0015(13) | 0.0169(16)  |
| C27 | 0.0428(19) | 0.0362(18) | 0.0360(17) | 0.0023(14)  | 0.0136(15)  | 0.0021(15)  |
| C28 | 0.0326(16) | 0.0257(14) | 0.0365(16) | -0.0011(13) | 0.0016(13)  | -0.0062(12) |
| N3  | 0.0250(12) | 0.0191(11) | 0.0276(12) | 0.0000(9)   | -0.0066(9)  | 0.0001(10)  |
| C29 | 0.0328(15) | 0.0201(13) | 0.0272(14) | 0.0042(11)  | -0.0077(11) | -0.0047(11) |
| C30 | 0.0315(14) | 0.0248(14) | 0.0279(13) | 0.0057(12)  | -0.0022(12) | -0.0040(12) |
| C31 | 0.0249(13) | 0.0226(13) | 0.0280(13) | 0.0000(11)  | 0.0005(11)  | -0.0004(11) |
| N4  | 0.0237(11) | 0.0202(10) | 0.0271(11) | 0.0003(9)   | -0.0003(9)  | -0.0024(9)  |
| C32 | 0.0306(15) | 0.0293(14) | 0.0277(14) | -0.0001(11) | 0.0002(12)  | 0.0015(12)  |
| C33 | 0.0346(17) | 0.058(2)   | 0.0415(17) | 0.0204(17)  | 0.0049(14)  | -0.0021(16) |
| C34 | 0.0315(16) | 0.0389(16) | 0.0320(15) | 0.0029(13)  | 0.0055(12)  | -0.0012(13) |
| C35 | 0.0275(14) | 0.0307(14) | 0.0319(14) | -0.0036(12) | 0.0023(12)  | -0.0001(12) |
| C36 | 0.0400(17) | 0.0272(15) | 0.0459(18) | 0.0081(13)  | 0.0050(14)  | 0.0042(13)  |
| O4  | 0.0434(14) | 0.0339(12) | 0.0659(16) | 0.0119(12)  | 0.0187(12)  | 0.0142(10)  |
| C37 | 0.0305(14) | 0.0217(12) | 0.0258(13) | -0.0008(11) | 0.0014(11)  | 0.0023(12)  |
| C38 | 0.0274(15) | 0.0260(15) | 0.0350(15) | -0.0017(12) | -0.0009(13) | -0.0008(12) |
| C39 | 0.0396(17) | 0.0326(16) | 0.0321(15) | 0.0019(13)  | 0.0112(13)  | -0.0030(13) |
| C40 | 0.0451(18) | 0.0390(17) | 0.0205(13) | -0.0014(12) | 0.0065(12)  | 0.0047(14)  |
| C41 | 0.0293(15) | 0.0320(15) | 0.0269(14) | -0.0058(12) | -0.0021(11) | 0.0011(12)  |

|     | $U_{11}$   | $U_{22}$   | $U_{33}$   | $U_{23}$    | $U_{13}$    | $U_{12}$    |
|-----|------------|------------|------------|-------------|-------------|-------------|
| C42 | 0.0334(15) | 0.0263(15) | 0.0255(13) | -0.0020(12) | 0.0026(11)  | -0.0020(12) |
| S2  | 0.0231(3)  | 0.0225(3)  | 0.0311(3)  | 0.0016(3)   | -0.0019(3)  | 0.0067(3)   |
| O5  | 0.0209(10) | 0.0399(12) | 0.0470(13) | 0.0075(10)  | -0.0015(9)  | 0.0040(9)   |
| O6  | 0.0410(12) | 0.0261(10) | 0.0388(11) | -0.0043(9)  | 0.0025(10)  | 0.0137(9)   |
| C43 | 0.0216(13) | 0.0215(13) | 0.0205(13) | -0.0012(10) | 0.0006(10)  | 0.0039(10)  |
| C44 | 0.0241(14) | 0.0230(13) | 0.0274(14) | 0.0009(11)  | -0.0012(11) | -0.0023(11) |
| C45 | 0.0338(15) | 0.0190(13) | 0.0275(14) | 0.0035(11)  | -0.0032(12) | -0.0010(11) |
| C46 | 0.0281(14) | 0.0240(13) | 0.0164(11) | 0.0007(10)  | 0.0016(10)  | 0.0038(11)  |
| C47 | 0.0273(14) | 0.0262(14) | 0.0211(12) | -0.0040(11) | -0.0031(10) | -0.0013(11) |
| C48 | 0.0279(14) | 0.0186(12) | 0.0239(13) | -0.0023(11) | 0.0008(11)  | -0.0003(11) |
| C49 | 0.0360(17) | 0.0325(16) | 0.0219(13) | 0.0005(12)  | -0.0038(12) | 0.0075(13)  |
| C50 | 0.0275(15) | 0.0226(14) | 0.0298(16) | -0.0018(11) | -0.0062(12) | -0.0037(12) |
| C51 | 0.0238(14) | 0.0181(12) | 0.0321(15) | -0.0007(12) | -0.0049(12) | -0.0038(11) |
| C52 | 0.0345(16) | 0.0202(13) | 0.0373(16) | 0.0018(13)  | -0.0059(13) | 0.0019(12)  |
| C53 | 0.0310(16) | 0.0250(15) | 0.0418(18) | -0.0043(13) | 0.0014(14)  | -0.0006(13) |
| C54 | 0.0310(16) | 0.0337(16) | 0.0389(16) | 0.0083(13)  | 0.0003(13)  | -0.0064(14) |
| C55 | 0.0292(16) | 0.0412(18) | 0.052(2)   | 0.0209(16)  | 0.0020(14)  | 0.0064(14)  |
| C56 | 0.0259(15) | 0.0334(17) | 0.0464(18) | 0.0086(15)  | 0.0049(14)  | 0.0063(13)  |

**Table 8. Hydrogen atomic coordinates and isotropic atomic displacement parameters ( $\text{\AA}^2$ ) for Compound 5d.**

|     | x/a     | y/b    | z/c    | U(eq) |
|-----|---------|--------|--------|-------|
| H3  | 0.2774  | 0.7640 | 0.4148 | 0.027 |
| H4  | 0.1767  | 0.6984 | 0.3386 | 0.058 |
| H5A | 0.0224  | 0.6098 | 0.3184 | 0.083 |
| H5B | 0.0920  | 0.5328 | 0.3440 | 0.083 |
| H6A | -0.1216 | 0.5946 | 0.3750 | 0.068 |
| H6B | -0.0231 | 0.5488 | 0.4091 | 0.068 |
| H7A | -0.0444 | 0.7267 | 0.3919 | 0.042 |
| H7B | -0.0358 | 0.6812 | 0.4416 | 0.042 |
| H8A | 0.3166  | 0.5773 | 0.3376 | 0.07  |
| H8B | 0.3616  | 0.6503 | 0.3722 | 0.07  |
| H1A | 0.2451  | 0.5675 | 0.4247 | 0.087 |
| H10 | 0.2844  | 0.6984 | 0.4927 | 0.033 |
| H11 | 0.2541  | 0.7231 | 0.5712 | 0.04  |
| H12 | 0.1099  | 0.8245 | 0.5958 | 0.041 |
| H13 | -0.0035 | 0.9024 | 0.5412 | 0.038 |
| H14 | 0.0272  | 0.8783 | 0.4623 | 0.032 |

|      | <b>x/a</b> | <b>y/b</b> | <b>z/c</b> | <b>U(eq)</b> |
|------|------------|------------|------------|--------------|
| H16  | 0.1221     | 0.7701     | 0.2620     | 0.028        |
| H17  | -0.0149    | 0.6803     | 0.2224     | 0.03         |
| H19  | -0.2459    | 0.8769     | 0.1949     | 0.027        |
| H20  | -0.1102    | 0.9679     | 0.2346     | 0.025        |
| H21A | -0.1990    | 0.7053     | 0.1463     | 0.046        |
| H21B | -0.3145    | 0.7355     | 0.1775     | 0.046        |
| H21C | -0.2317    | 0.6561     | 0.1931     | 0.046        |
| H22A | -0.1201    | 0.9540     | 0.3293     | 0.03         |
| H22B | -0.0605    | 1.0457     | 0.3212     | 0.03         |
| H24  | 0.0456     | 1.1119     | 0.3952     | 0.043        |
| H25  | 0.0043     | 1.1444     | 0.4721     | 0.053        |
| H26  | -0.1496    | 1.0704     | 0.5129     | 0.045        |
| H27  | -0.2629    | 0.9645     | 0.4758     | 0.046        |
| H28  | -0.2178    | 0.9290     | 0.3998     | 0.038        |
| H31  | 0.5082     | 0.2825     | 0.4223     | 0.03         |
| H32  | 0.5942     | 0.3291     | 0.3407     | 0.035        |
| H33A | 0.7550     | 0.3985     | 0.3093     | 0.054        |
| H33B | 0.7499     | 0.4714     | 0.3481     | 0.054        |
| H34A | 0.9286     | 0.3534     | 0.3464     | 0.041        |
| H34B | 0.8943     | 0.4060     | 0.3924     | 0.041        |
| H35A | 0.7975     | 0.2433     | 0.3665     | 0.036        |
| H35B | 0.8532     | 0.2700     | 0.4163     | 0.036        |
| H36A | 0.5660     | 0.4670     | 0.4040     | 0.045        |
| H36B | 0.5263     | 0.4756     | 0.3508     | 0.045        |
| H4A  | 0.3648     | 0.4351     | 0.3945     | 0.072        |
| H38  | 0.5091     | 0.1244     | 0.4677     | 0.035        |
| H39  | 0.5349     | 0.0854     | 0.5447     | 0.042        |
| H40  | 0.6756     | 0.1592     | 0.5919     | 0.042        |
| H41  | 0.7867     | 0.2735     | 0.5617     | 0.035        |
| H42  | 0.7580     | 0.3144     | 0.4852     | 0.034        |
| H44  | 0.6267     | 0.2356     | 0.2633     | 0.03         |
| H45  | 0.4883     | 0.3251     | 0.2244     | 0.032        |
| H47  | 0.2637     | 0.1265     | 0.1946     | 0.03         |
| H48  | 0.4010     | 0.0360     | 0.2333     | 0.028        |
| H49A | 0.2963     | 0.3518     | 0.1867     | 0.045        |
| H49B | 0.1876     | 0.2824     | 0.1911     | 0.045        |
| H49C | 0.2784     | 0.2823     | 0.1470     | 0.045        |
| H50A | 0.4519     | -0.0474    | 0.3219     | 0.032        |
| H50B | 0.3794     | 0.0408     | 0.3271     | 0.032        |

|     | <b>x/a</b> | <b>y/b</b> | <b>z/c</b> | <b>U(eq)</b> |
|-----|------------|------------|------------|--------------|
| H52 | 0.2820     | 0.0723     | 0.3975     | 0.037        |
| H53 | 0.2327     | 0.0400     | 0.4742     | 0.039        |
| H54 | 0.3452     | -0.0658    | 0.5129     | 0.041        |
| H55 | 0.4988     | -0.1419    | 0.4733     | 0.049        |
| H56 | 0.5467     | -0.1096    | 0.3970     | 0.042        |
